# Supplementary material for: Determining the effects of paternal obesity on sperm chromatin at histone H3 lysine 4 tri-methylation in relation to the placental transcriptome and cellular composition
Source: eLife journal article supplement (doi:10.7554/elife.83288), 2024-11-29

Figure 3 - Figure supplement 1

A

Regions with decreased H3K4me3 enrichment  
at tissue-specific enhancers

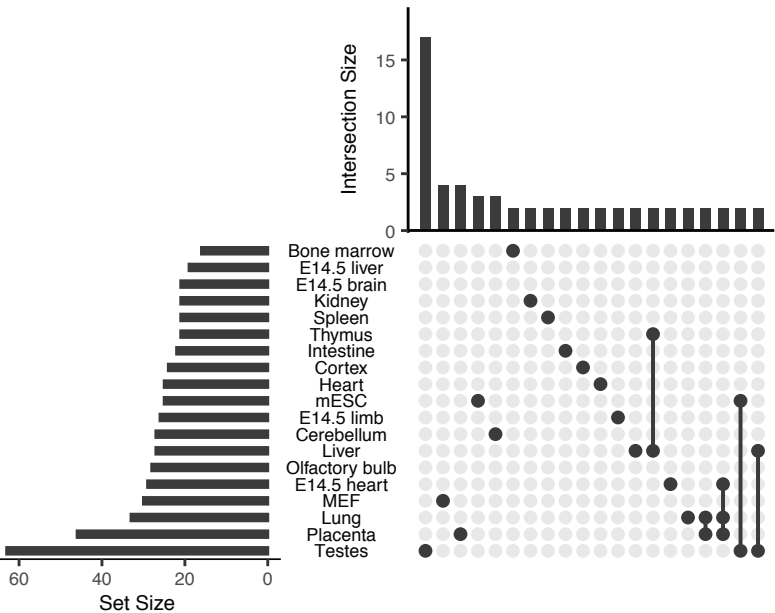

B

Regions with increased H3K4me3 enrichment  
at tissue-specific enhancers

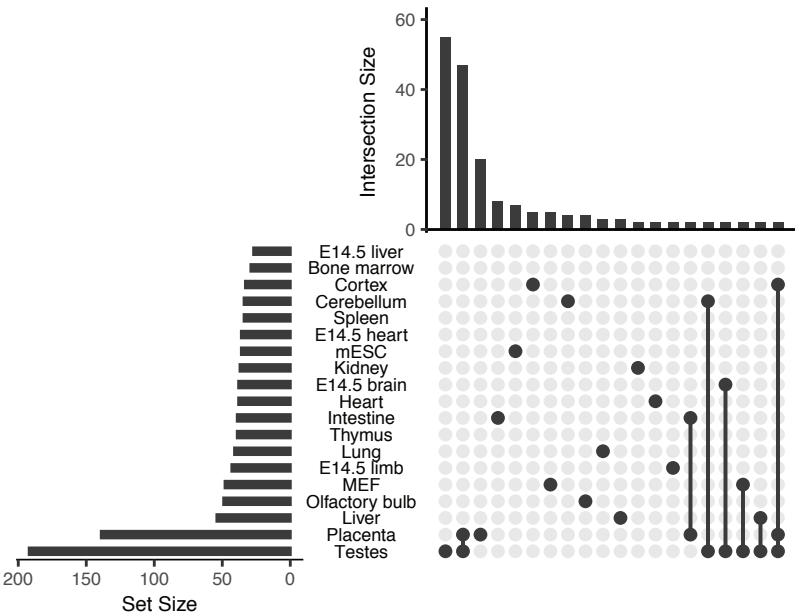

Supplement: supp [file elife-83288-supp-v1.zip]
