# Supplementary material for: Determining the effects of paternal obesity on sperm chromatin at histone H3 lysine 4 tri-methylation in relation to the placental transcriptome and cellular composition
Source: eLife. 2024 Nov 29;13:e83288. doi: 10.7554/eLife.83288 (PMC11717366; doi:10.7554/eLife.83288)
Supplement: Supplementary file 1. — (a) ChIP-sequencing sample information and read statistics. (b) Significant gene ontology terms enriched in high-fat diet (HFD)-sperm differentially expressed histone H3 lysine 4 tri-methylation (deH3K4me3) regions at promoters detected in our previous study and this study, related to Figure 2—figure supplement 1E. (c) Significant gene ontology terms enriched in HFD-sperm at regions showing a decrease in H3K4me3 at promoters, related to Figure 2—figure supplement 1E. (d) Significant gene ontology terms enriched in HFD-sperm at regions showing an increase in H3K4me3 at promoters, related to Figure 2—figure supplement 1E. (e) Significant gene ontology terms enriched in differentially expressed genes in female placentas derived from HFD-sires, related to Figure 4C. (f) Significant gene ontology terms enriched in differentially expressed genes in male placentas derived from HFD-sires, related to Figure 4D. (g) Reference single-cell RNA-sequencing data information (from Han et al., 2018) – number of cells per cell type, related to Figure 5—figure supplement 1. [file elife-83288-supp1.xlsx]

## Sheet: Supplementary_file_1a
Sample ID	Number of animals pooled	Number of reads	% of duplicates	Alignment rate (%)
CON1	2	40345634	0.42071	98.21
HFD1	7	40701175	0.52037	98.18
CON2	2	45399661	0.51594	97.72
HFD2	5	37976375	0.47043	98.04
CON3	4	37622335	0.40624	98.14
HFD3	4	42775479	0.35213	98.47

## Sheet: Supplementary_file_1b
GO.cluster	Cluster given name	Cluster name	IC	GO.ID	term	definition	Sperm_deH3K4me3_Paper1.genes_frequency	Sperm_deH3K4me3_Paper1.pvalue	Sperm_deH3K4me3_Paper1.-log10_pvalue	Sperm_deH3K4me3_Paper1.Significant_genes	Sperm_deH3K4me3_Paper1.Significant_genes_symbol	Sperm_deH3K4me3_Paper2.genes_frequency	Sperm_deH3K4me3_Paper2.pvalue	Sperm_deH3K4me3_Paper2.-log10_pvalue	Sperm_deH3K4me3_Paper2.Significant_genes	Sperm_deH3K4me3_Paper2.Significant_genes_symbol
1		nucleobase-containing compound metabolic process	8.96	GO:0009148	pyrimidine nucleoside triphosphate biosynthetic process	The chemical reactions and pathways resulting in the formation of pyrimidine nucleoside triphosphate, a compound consisting of a pyrimidine base linked to a ribose or deoxyribose sugar esterified with triphosphate on the sugar.	0% (0/14)	1	0	NA	NA	21.43% (3/14)	0.00237558	2.62	18103;54369;56520	Nme2;Nme6;Nme4
1			9.14	GO:0009209	pyrimidine ribonucleoside triphosphate biosynthetic process	The chemical reactions and pathways resulting in the formation of pyrimidine ribonucleoside triphosphate, a compound consisting of a pyrimidine base linked to a ribose sugar esterified with triphosphate on the sugar.	0% (0/11)	1	0	NA	NA	27.27% (3/11)	0.00112542	2.95	18103;54369;56520	Nme2;Nme6;Nme4
1			8.96	GO:0009208	pyrimidine ribonucleoside triphosphate metabolic process	The chemical reactions and pathways involving pyrimidine ribonucleoside triphosphate, a compound consisting of a pyrimidine base linked to a ribose sugar esterified with triphosphate on the sugar.	0% (0/13)	1	0	NA	NA	23.08% (3/13)	0.00189416	2.72	18103;54369;56520	Nme2;Nme6;Nme4
1			6.82	GO:0009141	nucleoside triphosphate metabolic process	The chemical reactions and pathways involving a nucleoside triphosphate, a compound consisting of a nucleobase linked to a deoxyribose or ribose sugar esterified with triphosphate on the sugar.	0.88% (1/113)	0.845758	0.07	NA	NA	6.19% (7/113)	0.00723163	2.14	18103;382985;50799;54369;56520;66422;67942	Nme2;Rrm2b;Slc25a13;Nme6;Nme4;Dctpp1;Atp5g2
1			8.67	GO:0009147	pyrimidine nucleoside triphosphate metabolic process	The chemical reactions and pathways involving pyrimidine nucleoside triphosphate, a compound consisting of a pyrimidine base linked to a ribose or deoxyribose sugar esterified with triphosphate on the sugar.	0% (0/18)	1	0	NA	NA	22.22% (4/18)	0.000370185	3.43	18103;54369;56520;66422	Nme2;Nme6;Nme4;Dctpp1
1			9.57	GO:0046036	CTP metabolic process	The chemical reactions and pathways involving CTP, cytidine triphosphate.	0% (0/11)	1	0	NA	NA	27.27% (3/11)	0.00112542	2.95	18103;54369;56520	Nme2;Nme6;Nme4
1			9.74	GO:0046051	UTP metabolic process	The chemical reactions and pathways involving UTP, uridine (5'-)triphosphate.	0% (0/11)	1	0	NA	NA	27.27% (3/11)	0.00112542	2.95	18103;54369;56520	Nme2;Nme6;Nme4
1			7.26	GO:0006220	pyrimidine nucleotide metabolic process	The chemical reactions and pathways involving a pyrimidine nucleotide, a compound consisting of nucleoside (a pyrimidine base linked to a deoxyribose or ribose sugar) esterified with a phosphate group at either the 3' or 5'-hydroxyl group of the sugar.	2.38% (1/42)	0.500255	0.3	NA	NA	16.67% (7/42)	1.67128e-05	4.78	107569;18103;22171;54369;56520;66422;68971	Nt5c3;Nme2;Tyms;Nme6;Nme4;Dctpp1;Tamm41
1			8.01	GO:0009218	pyrimidine ribonucleotide metabolic process	The chemical reactions and pathways involving a pyrimidine ribonucleotide, a compound consisting of nucleoside (a pyrimidine base linked to a ribose sugar) esterified with a phosphate group at either the 3' or 5'-hydroxyl group of the sugar.	3.85% (1/26)	0.349005	0.46	NA	NA	15.38% (4/26)	0.00159611	2.8	107569;18103;54369;56520	Nt5c3;Nme2;Nme6;Nme4
1			8.13	GO:0009219	pyrimidine deoxyribonucleotide metabolic process	The chemical reactions and pathways involving a pyrimidine deoxynucleotide, a compound consisting of nucleoside (a pyrimidine base linked to a deoxyribose sugar) esterified with a phosphate group at either the 3' or 5'-hydroxyl group of the sugar.	4.55% (1/22)	0.30454	0.52	NA	NA	18.18% (4/22)	0.000831259	3.08	107569;18103;22171;66422	Nt5c3;Nme2;Tyms;Dctpp1
1			9.37	GO:0046073	dTMP metabolic process	The chemical reactions and pathways involving dTMP, deoxyribosylthymine monophosphate (2'-deoxyribosylthymine 5'-phosphate).	7.14% (1/14)	0.20632	0.69	NA	NA	21.43% (3/14)	0.00237558	2.62	107569;18103;22171	Nt5c3;Nme2;Tyms
1			5.06	GO:0006753	nucleoside phosphate metabolic process	The chemical reactions and pathways involving any phosphorylated nucleoside.	2.65% (12/452)	0.0696963	1.16	NA	NA	3.76% (17/452)	0.00902118	2.04	107569;11474;12183;15356;18103;22171;23959;382985;50799;54369;56520;66422;67942;68738;68971;72106;73724	Nt5c3;Actn3;Bpgm;Hmgcl;Nme2;Tyms;Nt5e;Rrm2b;Slc25a13;Nme6;Nme4;Dctpp1;Atp5g2;Acss1;Tamm41;Jmjd8;Mcee
1			5.12	GO:0009117	nucleotide metabolic process	The chemical reactions and pathways involving a nucleotide, a nucleoside that is esterified with (ortho)phosphate or an oligophosphate at any hydroxyl group on the glycose moiety; may be mono-, di- or triphosphate; this definition includes cyclic nucleotides (nucleoside cyclic phosphates).	2.7% (12/444)	0.0627819	1.2	NA	NA	3.83% (17/444)	0.00763267	2.12	107569;11474;12183;15356;18103;22171;23959;382985;50799;54369;56520;66422;67942;68738;68971;72106;73724	Nt5c3;Actn3;Bpgm;Hmgcl;Nme2;Tyms;Nt5e;Rrm2b;Slc25a13;Nme6;Nme4;Dctpp1;Atp5g2;Acss1;Tamm41;Jmjd8;Mcee
1			7.4	GO:0009262	deoxyribonucleotide metabolic process	The chemical reactions and pathways involving a deoxyribonucleotide, a compound consisting of deoxyribonucleoside (a base linked to a deoxyribose sugar) esterified with a phosphate group at either the 3' or 5'-hydroxyl group of the sugar.	2.08% (1/48)	0.54745	0.26	NA	NA	10.42% (5/48)	0.00251376	2.6	107569;18103;22171;382985;66422	Nt5c3;Nme2;Tyms;Rrm2b;Dctpp1
1			7.51	GO:0009394	2'-deoxyribonucleotide metabolic process	The chemical reactions and pathways involving a 2'-deoxyribonucleotide, a compound consisting of 2'-deoxyribonucleoside (a base linked to a 2'-deoxyribose sugar) esterified with a phosphate group at either the 3' or 5'-hydroxyl group of the sugar.	2.17% (1/46)	0.532235	0.27	NA	NA	10.87% (5/46)	0.00207822	2.68	107569;18103;22171;382985;66422	Nt5c3;Nme2;Tyms;Rrm2b;Dctpp1
1			8.04	GO:0009129	pyrimidine nucleoside monophosphate metabolic process	The chemical reactions and pathways involving pyrimidine nucleoside monophosphate, a compound consisting of a pyrimidine base linked to a ribose or deoxyribose sugar esterified with phosphate on the sugar.	4.55% (1/22)	0.30454	0.52	NA	NA	13.64% (3/22)	0.00894069	2.05	107569;18103;22171	Nt5c3;Nme2;Tyms
1			8.61	GO:0009176	pyrimidine deoxyribonucleoside monophosphate metabolic process	The chemical reactions and pathways involving pyrimidine deoxynucleoside monophosphate, a compound consisting of a pyrimidine base linked to a deoxyribose sugar esterified with phosphate on the sugar.	5.88% (1/17)	0.244677	0.61	NA	NA	17.65% (3/17)	0.00424689	2.37	107569;18103;22171	Nt5c3;Nme2;Tyms
1			6.78	GO:0009116	nucleoside metabolic process	The chemical reactions and pathways involving a nucleoside, a nucleobase linked to either beta-D-ribofuranose (a ribonucleoside) or 2-deoxy-beta-D-ribofuranose, (a deoxyribonucleoside), e.g. adenosine, guanosine, inosine, cytidine, uridine and deoxyadenosine, deoxyguanosine, deoxycytidine and thymidine (= deoxythymidine).	1.09% (1/92)	0.781537	0.11	NA	NA	6.52% (6/92)	0.0098748	2.01	107569;18103;23959;54369;56520;68556	Nt5c3;Nme2;Nt5e;Nme6;Nme4;Uckl1
1			2.36	GO:0006139	nucleobase-containing compound metabolic process	Any cellular metabolic process involving nucleobases, nucleosides, nucleotides and nucleic acids.	2.02% (101/4991)	0.00986236	2.01	107569;109077;11474;11555;11568;11834;11906;12029;12142;12389;12394;12416;12445;12683;13593;13983;14130;14652;14683;14842;15356;15511;16002;17855;17872;18028;18091;18514;18616;19134;19223;19285;20319;20416;209011;211151;212712;21413;214133;216154;216853;217069;223646;224691;224829;22658;226641;229512;231506;235047;23971;245263;245841;26901;27273;328274;330502;332110;381373;382913;384619;385674;38…	Nt5c3;Ints5;Actn3;Adrb2;Aebp1;Aqr;Zfhx3;Bcl6b;Prdm1;Cav1;Runx1;Cbx2;Ccnd3;Cidea;Ebf3;Esr2;Fcgr2b;Glp1r;Gnas;Gsx1;Hmgcl;Hspa1b;Igf2;Mvk;Ppp1r15a;Nfib;Nkx2-5;Pbx1;Peg3;Prpf4b;Ptgis;Cavin1;Sfrp2;Shc1;Sirt7;Churc1;Satb2;Tcf4;Tet2;Med16;Wrap53;Trim25;Naprt;Zfp472;Trerf1;Pcgf2;Atf6;Smg5;Lin54;Zfp809;Papss1;Gm4981;Polr2h;Ss18l2;Pdk4;Zfp459;Zfp82;Mapk15;Sp9;Neil2;Kash5;Zfp174;Zhx2;Angel2;Acaa2;Batf;Irf3;…	2.68% (134/4991)	5.23767e-05	4.28	100336;104156;107045;107568;107569;107607;107829;11474;11757;11758;11785;11921;12028;12142;12183;12367;12850;13199;13636;13654;13712;13983;14158;14609;15227;15356;15368;15373;15397;16002;16363;16535;16599;170787;170936;17314;18103;18207;18424;19205;19698;20193;20429;20678;208647;20877;209200;209584;210104;212712;21413;216151;216154;21672;21678;216853;21937;22059;22084;22171;224619;224694;225631;2…	Ppp1r8;Etv5;Lars;Wwp1;Nt5c3;Nod1;Thoc5;Actn3;Prdx3;Prdx6;Apbb1;Atoh1;Bax;Prdm1;Bpgm;Casp3;Coq7;Ddn;Efna1;Egr2;Elk1;Esr2;Fer;Gja1;Foxf1;Hmgcl;Hmox1;Hmx3;Hoxa11os;Igf2;Irf2;Kcnq1;Klf3;Hdac10;Zfp369;Mgmt;Nme2;Nthl1;Otx2;Ptbp1;Relb;S100a1;Shox2;Sox5;Creb3l2;Aurkb;Dtx3l;Tyw3;Zfp658;Satb2;Tcf4;Polrmt;Med16;Prdx2;Tead3;Wrap53;Tnfrsf1a;Trp53;Tsc2;Tyms;Traf7;Zfp81;Onecut2;Taf6l;Rorb;Ablim1;Zfp46;Uap1l1;Ga…
1			4.86	GO:0055086	nucleobase-containing small molecule metabolic process	The cellular chemical reactions and pathways involving a nucleobase-containing small molecule: a nucleobase, a nucleoside, or a nucleotide.	2.56% (13/507)	0.0751707	1.12	NA	NA	3.75% (19/507)	0.00619781	2.21	107569;11474;12183;15356;18103;22171;227620;23959;382985;50799;54369;56520;66422;67942;68556;68738;68971;72106;73724	Nt5c3;Actn3;Bpgm;Hmgcl;Nme2;Tyms;Uap1l1;Nt5e;Rrm2b;Slc25a13;Nme6;Nme4;Dctpp1;Atp5g2;Uckl1;Acss1;Tamm41;Jmjd8;Mcee
1			9.65	GO:0006183	GTP biosynthetic process	The chemical reactions and pathways resulting in the formation of GTP, guanosine triphosphate.	0% (0/11)	1	0	NA	NA	27.27% (3/11)	0.00112542	2.95	18103;54369;56520	Nme2;Nme6;Nme4
1			8.13	GO:0009163	nucleoside biosynthetic process	The chemical reactions and pathways resulting in the formation of any one of a family of organic molecules consisting of a purine or pyrimidine base covalently bonded to a sugar ribose (a ribonucleoside) or deoxyribose (a deoxyribonucleoside).	0% (0/30)	1	0	NA	NA	13.33% (4/30)	0.00274932	2.56	18103;23959;54369;56520	Nme2;Nt5e;Nme6;Nme4
1			8.13	GO:0042455	ribonucleoside biosynthetic process	The chemical reactions and pathways resulting in the formation of any ribonucleoside, a nucleoside in which purine or pyrimidine base is linked to a ribose (beta-D-ribofuranose) molecule.	0% (0/30)	1	0	NA	NA	13.33% (4/30)	0.00274932	2.56	18103;23959;54369;56520	Nme2;Nt5e;Nme6;Nme4
1			8.13	GO:0042451	purine nucleoside biosynthetic process	The chemical reactions and pathways resulting in the formation of any purine nucleoside, one of a family of organic molecules consisting of a purine base covalently bonded to a sugar ribose (a ribonucleoside) or deoxyribose (a deoxyribonucleoside).	0% (0/30)	1	0	NA	NA	13.33% (4/30)	0.00274932	2.56	18103;23959;54369;56520	Nme2;Nt5e;Nme6;Nme4
1			8.13	GO:0046129	purine ribonucleoside biosynthetic process	The chemical reactions and pathways resulting in the formation of any purine ribonucleoside, a nucleoside in which purine base is linked to a ribose (beta-D-ribofuranose) molecule.	0% (0/30)	1	0	NA	NA	13.33% (4/30)	0.00274932	2.56	18103;23959;54369;56520	Nme2;Nt5e;Nme6;Nme4
1			8.47	GO:0009263	deoxyribonucleotide biosynthetic process	The chemical reactions and pathways resulting in the formation of a deoxyribonucleotide, a compound consisting of deoxyribonucleoside (a base linked to a deoxyribose sugar) esterified with a phosphate group at either the 3' or 5'-hydroxyl group of the sugar.	0% (0/16)	1	0	NA	NA	18.75% (3/16)	0.00354905	2.45	18103;22171;382985	Nme2;Tyms;Rrm2b
1			8.64	GO:0009265	2'-deoxyribonucleotide biosynthetic process	The chemical reactions and pathways resulting in the formation of a 2'-deoxyribonucleotide, a compound consisting of 2'-deoxyribonucleoside (a base linked to a 2'-deoxyribose sugar) esterified with a phosphate group at either the 3' or 5'-hydroxyl group of the sugar.	0% (0/16)	1	0	NA	NA	18.75% (3/16)	0.00354905	2.45	18103;22171;382985	Nme2;Tyms;Rrm2b
1			9.74	GO:0006241	CTP biosynthetic process	The chemical reactions and pathways resulting in the formation of CTP, cytidine 5'-triphosphate.	0% (0/10)	1	0	NA	NA	30% (3/10)	0.000830642	3.08	18103;54369;56520	Nme2;Nme6;Nme4
1			7.79	GO:0006221	pyrimidine nucleotide biosynthetic process	The chemical reactions and pathways resulting in the formation of a pyrimidine nucleotide, a compound consisting of nucleoside (a pyrimidine base linked to a deoxyribose or ribose sugar) esterified with a phosphate group at either the 3' or 5'-hydroxyl group of the sugar.	0% (0/28)	1	0	NA	NA	17.86% (5/28)	0.000199409	3.7	18103;22171;54369;56520;68971	Nme2;Tyms;Nme6;Nme4;Tamm41
1			8.42	GO:0009220	pyrimidine ribonucleotide biosynthetic process	The chemical reactions and pathways resulting in the formation of a pyrimidine ribonucleotide, a compound consisting of nucleoside (a pyrimidine base linked to a ribose sugar) esterified with a phosphate group at either the 3' or 5'-hydroxyl group of the sugar.	0% (0/18)	1	0	NA	NA	16.67% (3/18)	0.00502223	2.3	18103;54369;56520	Nme2;Nme6;Nme4
2		nitrogen compound metabolic process	6.08	GO:0016485	protein processing	Any protein maturation process achieved by the cleavage of a peptide bond or bonds within a protein. Protein maturation is the process leading to the attainment of the full functional capacity of a protein.	4.83% (13/269)	0.000526892	3.28	103743;11568;12333;12369;12380;17389;17872;216725;66286;67759;68876;75736;76687	Tmem98;Aebp1;Capn1;Casp7;Cast;Mmp16;Ppp1r15a;Adamts2;Sec11c;Plgrkt;Atp23;Bcl2l12;Spcs3	2.97% (8/269)	0.165494	0.78	NA	NA
2			5.86	GO:0051604	protein maturation	Any process leading to the attainment of the full functional capacity of a protein.	3.89% (13/334)	0.0036236	2.44	103743;11568;12333;12369;12380;17389;17872;216725;66286;67759;68876;75736;76687	Tmem98;Aebp1;Capn1;Casp7;Cast;Mmp16;Ppp1r15a;Adamts2;Sec11c;Plgrkt;Atp23;Bcl2l12;Spcs3	2.69% (9/334)	0.217865	0.66	NA	NA
2			7.73	GO:0070613	regulation of protein processing	Any process that modulates the frequency, rate or extent of protein processing, any protein maturation process achieved by the cleavage of a peptide bond or bonds within a protein.	7.25% (5/69)	0.00545323	2.26	103743;12380;17872;67759;75736	Tmem98;Cast;Ppp1r15a;Plgrkt;Bcl2l12	7.25% (5/69)	0.0117887	1.93	NA	NA
2			7.7	GO:1903317	regulation of protein maturation	NA	6.94% (5/72)	0.00652545	2.19	103743;12380;17872;67759;75736	Tmem98;Cast;Ppp1r15a;Plgrkt;Bcl2l12	6.94% (5/72)	0.0139929	1.85	NA	NA
2			8.5	GO:0010955	negative regulation of protein processing	Any process that decreases the rate, frequency or extent of protein maturation by peptide bond cleavage.	14.29% (4/28)	0.00105898	2.98	103743;12380;17872;75736	Tmem98;Cast;Ppp1r15a;Bcl2l12	7.14% (2/28)	0.105331	0.98	NA	NA
2			8.5	GO:1903318	negative regulation of protein maturation	NA	14.29% (4/28)	0.00105898	2.98	103743;12380;17872;75736	Tmem98;Cast;Ppp1r15a;Bcl2l12	7.14% (2/28)	0.105331	0.98	NA	NA
2			7.23	GO:0006400	tRNA modification	The covalent alteration of one or more nucleotides within a tRNA molecule to produce a tRNA molecule with a sequence that differs from that coded genetically.	3.9% (3/77)	0.132126	0.88	NA	NA	7.79% (6/77)	0.00419785	2.38	209584;66966;66971;70153;72341;83669	Tyw3;Trit1;Cdk5rap1;2210016F16Rik;Elp6;Wdr6
2			6.51	GO:0008033	tRNA processing	The process in which a pre-tRNA molecule is converted to a mature tRNA, ready for addition of an aminoacyl group.	2.56% (3/117)	0.299986	0.52	NA	NA	6.84% (8/117)	0.00229029	2.64	209584;54364;66966;66971;70153;72341;73681;83669	Tyw3;Rpp30;Trit1;Cdk5rap1;2210016F16Rik;Elp6;Trmt11;Wdr6
2			6.08	GO:0006399	tRNA metabolic process	The chemical reactions and pathways involving tRNA, transfer RNA, a class of relatively small RNA molecules responsible for mediating the insertion of amino acids into the sequence of nascent polypeptide chains during protein synthesis. Transfer RNA is characterized by the presence of many unusual minor bases, the function of which has not been completely established.	2.4% (4/167)	0.292462	0.53	NA	NA	7.19% (12/167)	0.000127692	3.89	107045;209584;229487;237886;54364;66966;66971;70153;71941;72341;73681;83669	Lars;Tyw3;Gatb;Slfn9;Rpp30;Trit1;Cdk5rap1;2210016F16Rik;Cars2;Elp6;Trmt11;Wdr6
2			2.65	GO:0016070	RNA metabolic process	The cellular chemical reactions and pathways involving RNA, ribonucleic acid, one of the two main type of nucleic acid, consisting of a long, unbranched macromolecule formed from ribonucleotides joined in 3',5'-phosphodiester linkage.	2.09% (85/4068)	0.00855333	2.07	109077;11555;11568;11834;11906;12029;12142;12389;12394;12416;12445;13593;13983;14130;14652;14683;14842;15511;16002;17872;18028;18091;18514;18616;19134;19223;19285;20319;20416;209011;211151;212712;21413;214133;216154;217069;224691;224829;22658;226641;229512;231506;235047;245263;245841;26901;328274;330502;332110;381373;385674;387609;52477;53314;54131;550619;56698;57265;57314;58805;66172;66877;67836…	Ints5;Adrb2;Aebp1;Aqr;Zfhx3;Bcl6b;Prdm1;Cav1;Runx1;Cbx2;Ccnd3;Ebf3;Esr2;Fcgr2b;Glp1r;Gnas;Gsx1;Hspa1b;Igf2;Ppp1r15a;Nfib;Nkx2-5;Pbx1;Peg3;Prpf4b;Ptgis;Cavin1;Sfrp2;Shc1;Sirt7;Churc1;Satb2;Tcf4;Tet2;Med16;Trim25;Zfp472;Trerf1;Pcgf2;Atf6;Smg5;Lin54;Zfp809;Gm4981;Polr2h;Ss18l2;Zfp459;Zfp82;Mapk15;Sp9;Zfp174;Zhx2;Angel2;Batf;Irf3;Arid3c;Phax;Fzd2;Nelfcd;Mlxipl;Med11;Crnkl1;Wdr83;Foxk2;Rasl11a;Rpap1;Z…	2.53% (103/4068)	0.0037741	2.42	100336;104156;107045;107568;107607;107829;11757;11758;11785;11921;12142;12850;13199;13636;13654;13712;13983;14158;15227;15368;15373;15397;16002;16363;16599;170787;170936;18424;19205;19698;20193;20429;20678;208647;20877;209200;209584;210104;212712;21413;216151;216154;21672;21678;21937;22059;22084;224619;224694;225631;225895;225998;226251;22704;229487;230674;233902;237886;243910;244672;320145;33050…	Ppp1r8;Etv5;Lars;Wwp1;Nod1;Thoc5;Prdx3;Prdx6;Apbb1;Atoh1;Prdm1;Coq7;Ddn;Efna1;Egr2;Elk1;Esr2;Fer;Foxf1;Hmox1;Hmx3;Hoxa11os;Igf2;Irf2;Klf3;Hdac10;Zfp369;Otx2;Ptbp1;Relb;S100a1;Shox2;Sox5;Creb3l2;Aurkb;Dtx3l;Tyw3;Zfp658;Satb2;Tcf4;Polrmt;Med16;Prdx2;Tead3;Tnfrsf1a;Trp53;Tsc2;Traf7;Zfp81;Onecut2;Taf6l;Rorb;Ablim1;Zfp46;Gatb;Kdm4a;Fbxl19;Slfn9;Nfkbid;Cwf19l2;Sp8;Zfp82;Chek2;Il22;Camk1;Cbx7;Cks1b;Irf3…
2			2.45	GO:0090304	nucleic acid metabolic process	Any cellular metabolic process involving nucleic acids.	2% (91/4559)	0.0207368	1.68	NA	NA	2.54% (116/4559)	0.0016458	2.78	100336;104156;107045;107568;107607;107829;11757;11758;11785;11921;12028;12142;12367;12850;13199;13636;13654;13712;13983;14158;14609;15227;15368;15373;15397;16002;16363;16599;170787;170936;17314;18207;18424;19205;19698;20193;20429;20678;208647;20877;209200;209584;210104;212712;21413;216151;216154;21672;21678;216853;21937;22059;22084;224619;224694;225631;225895;225998;226251;22704;229487;230674;233…	Ppp1r8;Etv5;Lars;Wwp1;Nod1;Thoc5;Prdx3;Prdx6;Apbb1;Atoh1;Bax;Prdm1;Casp3;Coq7;Ddn;Efna1;Egr2;Elk1;Esr2;Fer;Gja1;Foxf1;Hmox1;Hmx3;Hoxa11os;Igf2;Irf2;Klf3;Hdac10;Zfp369;Mgmt;Nthl1;Otx2;Ptbp1;Relb;S100a1;Shox2;Sox5;Creb3l2;Aurkb;Dtx3l;Tyw3;Zfp658;Satb2;Tcf4;Polrmt;Med16;Prdx2;Tead3;Wrap53;Tnfrsf1a;Trp53;Tsc2;Traf7;Zfp81;Onecut2;Taf6l;Rorb;Ablim1;Zfp46;Gatb;Kdm4a;Fbxl19;Neil3;Slfn9;Nfkbid;Cwf19l2;Sp8…
2			2.96	GO:0006351	transcription, DNA-templated	The cellular synthesis of RNA on a template of DNA.	2.23% (70/3142)	0.00412961	2.38	11555;11568;11906;12029;12142;12389;12394;12416;12445;13593;13983;14130;14652;14683;14842;15511;16002;17872;18028;18091;18514;18616;19223;19285;20319;20416;209011;211151;212712;21413;214133;216154;217069;224691;224829;22658;226641;231506;235047;245263;245841;26901;328274;330502;332110;381373;385674;387609;53314;54131;550619;57265;57314;58805;66172;68837;68895;68925;68992;69159;69241;69790;69870;7…	Adrb2;Aebp1;Zfhx3;Bcl6b;Prdm1;Cav1;Runx1;Cbx2;Ccnd3;Ebf3;Esr2;Fcgr2b;Glp1r;Gnas;Gsx1;Hspa1b;Igf2;Ppp1r15a;Nfib;Nkx2-5;Pbx1;Peg3;Ptgis;Cavin1;Sfrp2;Shc1;Sirt7;Churc1;Satb2;Tcf4;Tet2;Med16;Trim25;Zfp472;Trerf1;Pcgf2;Atf6;Lin54;Zfp809;Gm4981;Polr2h;Ss18l2;Zfp459;Zfp82;Mapk15;Sp9;Zfp174;Zhx2;Batf;Irf3;Arid3c;Fzd2;Nelfcd;Mlxipl;Med11;Foxk2;Rasl11a;Rpap1;Zfp580;Rhebl1;Polr2d;Med30;Polr3gl;Zfp248;Trim14…	2.48% (78/3142)	0.0190314	1.72	NA	NA
2			3.48	GO:0006366	transcription by RNA polymerase II	The synthesis of RNA from a DNA template by RNA polymerase II (RNAP II), originating at an RNA polymerase II promoter. Includes transcription of messenger RNA (mRNA) and certain small nuclear RNAs (snRNAs).	2.39% (57/2388)	0.00233137	2.63	11555;11568;11906;12029;12142;12389;12394;12416;12445;13593;13983;14652;14683;14842;16002;17872;18028;18091;18514;18616;20319;209011;211151;212712;21413;214133;216154;224691;224829;22658;226641;235047;245263;245841;26901;328274;330502;332110;381373;385674;387609;53314;54131;550619;57314;58805;66172;68837;68925;68992;69241;69790;72720;75736;76900;79362;93837	Adrb2;Aebp1;Zfhx3;Bcl6b;Prdm1;Cav1;Runx1;Cbx2;Ccnd3;Ebf3;Esr2;Glp1r;Gnas;Gsx1;Igf2;Ppp1r15a;Nfib;Nkx2-5;Pbx1;Peg3;Sfrp2;Sirt7;Churc1;Satb2;Tcf4;Tet2;Med16;Zfp472;Trerf1;Pcgf2;Atf6;Zfp809;Gm4981;Polr2h;Ss18l2;Zfp459;Zfp82;Mapk15;Sp9;Zfp174;Zhx2;Batf;Irf3;Arid3c;Nelfcd;Mlxipl;Med11;Foxk2;Rpap1;Zfp580;Polr2d;Med30;Zfp248;Bcl2l12;Ssbp4;Bhlhe41;Dach2	2.55% (61/2388)	0.0222663	1.65	NA	NA
2			2.85	GO:0034654	nucleobase-containing compound biosynthetic process	The chemical reactions and pathways resulting in the formation of nucleobases, nucleosides, nucleotides and nucleic acids.	2.15% (76/3539)	0.00692883	2.16	107569;11555;11568;11906;12029;12142;12389;12394;12416;12445;13593;13983;14130;14652;14683;14842;15511;16002;17872;18028;18091;18514;18616;19223;19285;20319;20416;209011;211151;212712;21413;214133;216154;216853;217069;223646;224691;224829;22658;226641;231506;235047;23971;245263;245841;26901;27273;328274;330502;332110;381373;385674;387609;53314;54131;550619;57265;57314;58805;66172;67126;68837;6889…	Nt5c3;Adrb2;Aebp1;Zfhx3;Bcl6b;Prdm1;Cav1;Runx1;Cbx2;Ccnd3;Ebf3;Esr2;Fcgr2b;Glp1r;Gnas;Gsx1;Hspa1b;Igf2;Ppp1r15a;Nfib;Nkx2-5;Pbx1;Peg3;Ptgis;Cavin1;Sfrp2;Shc1;Sirt7;Churc1;Satb2;Tcf4;Tet2;Med16;Wrap53;Trim25;Naprt;Zfp472;Trerf1;Pcgf2;Atf6;Lin54;Zfp809;Papss1;Gm4981;Polr2h;Ss18l2;Pdk4;Zfp459;Zfp82;Mapk15;Sp9;Zfp174;Zhx2;Batf;Irf3;Arid3c;Fzd2;Nelfcd;Mlxipl;Med11;Atp5e;Foxk2;Rasl11a;Rpap1;Zfp580;Rheb…	2.68% (95/3539)	0.000940614	3.03	104156;107568;107569;107607;107829;11757;11785;11921;12142;12850;13199;13636;13654;13712;13983;14158;14609;15227;15368;15373;15397;16002;16363;16599;170787;170936;18103;18424;19205;19698;20193;20429;20678;208647;20877;209200;210104;212712;21413;216151;216154;21672;21678;216853;21937;22059;22084;22171;224619;224694;225631;225895;225998;226251;22704;227620;230674;233902;23959;243910;320145;330502;3…	Etv5;Wwp1;Nt5c3;Nod1;Thoc5;Prdx3;Apbb1;Atoh1;Prdm1;Coq7;Ddn;Efna1;Egr2;Elk1;Esr2;Fer;Gja1;Foxf1;Hmox1;Hmx3;Hoxa11os;Igf2;Irf2;Klf3;Hdac10;Zfp369;Nme2;Otx2;Ptbp1;Relb;S100a1;Shox2;Sox5;Creb3l2;Aurkb;Dtx3l;Zfp658;Satb2;Tcf4;Polrmt;Med16;Prdx2;Tead3;Wrap53;Tnfrsf1a;Trp53;Tsc2;Tyms;Traf7;Zfp81;Onecut2;Taf6l;Rorb;Ablim1;Zfp46;Uap1l1;Kdm4a;Fbxl19;Nt5e;Nfkbid;Sp8;Zfp82;Rrm2b;Primpol;Slc25a13;Chek2;Il22;…
2			2.95	GO:0032774	RNA biosynthetic process	The chemical reactions and pathways resulting in the formation of RNA, ribonucleic acid, one of the two main type of nucleic acid, consisting of a long, unbranched macromolecule formed from ribonucleotides joined in 3',5'-phosphodiester linkage. Includes polymerization of ribonucleotide monomers. Refers not only to transcription but also to e.g. viral RNA replication.	2.22% (70/3159)	0.00469945	2.33	11555;11568;11906;12029;12142;12389;12394;12416;12445;13593;13983;14130;14652;14683;14842;15511;16002;17872;18028;18091;18514;18616;19223;19285;20319;20416;209011;211151;212712;21413;214133;216154;217069;224691;224829;22658;226641;231506;235047;245263;245841;26901;328274;330502;332110;381373;385674;387609;53314;54131;550619;57265;57314;58805;66172;68837;68895;68925;68992;69159;69241;69790;69870;7…	Adrb2;Aebp1;Zfhx3;Bcl6b;Prdm1;Cav1;Runx1;Cbx2;Ccnd3;Ebf3;Esr2;Fcgr2b;Glp1r;Gnas;Gsx1;Hspa1b;Igf2;Ppp1r15a;Nfib;Nkx2-5;Pbx1;Peg3;Ptgis;Cavin1;Sfrp2;Shc1;Sirt7;Churc1;Satb2;Tcf4;Tet2;Med16;Trim25;Zfp472;Trerf1;Pcgf2;Atf6;Lin54;Zfp809;Gm4981;Polr2h;Ss18l2;Zfp459;Zfp82;Mapk15;Sp9;Zfp174;Zhx2;Batf;Irf3;Arid3c;Fzd2;Nelfcd;Mlxipl;Med11;Foxk2;Rasl11a;Rpap1;Zfp580;Rhebl1;Polr2d;Med30;Polr3gl;Zfp248;Trim14…	2.47% (78/3159)	0.0213709	1.67	NA	NA
2			2.96	GO:0097659	nucleic acid-templated transcription	The cellular synthesis of RNA on a template of nucleic acid (DNA or RNA).	2.23% (70/3146)	0.00425798	2.37	11555;11568;11906;12029;12142;12389;12394;12416;12445;13593;13983;14130;14652;14683;14842;15511;16002;17872;18028;18091;18514;18616;19223;19285;20319;20416;209011;211151;212712;21413;214133;216154;217069;224691;224829;22658;226641;231506;235047;245263;245841;26901;328274;330502;332110;381373;385674;387609;53314;54131;550619;57265;57314;58805;66172;68837;68895;68925;68992;69159;69241;69790;69870;7…	Adrb2;Aebp1;Zfhx3;Bcl6b;Prdm1;Cav1;Runx1;Cbx2;Ccnd3;Ebf3;Esr2;Fcgr2b;Glp1r;Gnas;Gsx1;Hspa1b;Igf2;Ppp1r15a;Nfib;Nkx2-5;Pbx1;Peg3;Ptgis;Cavin1;Sfrp2;Shc1;Sirt7;Churc1;Satb2;Tcf4;Tet2;Med16;Trim25;Zfp472;Trerf1;Pcgf2;Atf6;Lin54;Zfp809;Gm4981;Polr2h;Ss18l2;Zfp459;Zfp82;Mapk15;Sp9;Zfp174;Zhx2;Batf;Irf3;Arid3c;Fzd2;Nelfcd;Mlxipl;Med11;Foxk2;Rasl11a;Rpap1;Zfp580;Rhebl1;Polr2d;Med30;Polr3gl;Zfp248;Trim14…	2.48% (78/3146)	0.019562	1.71	NA	NA
2			4.32	GO:0051253	negative regulation of RNA metabolic process	Any process that stops, prevents, or reduces the frequency, rate or extent of the chemical reactions and pathways involving RNA.	2.56% (35/1367)	0.00596969	2.22	11568;11906;12029;12142;12389;12394;12416;12445;13983;16002;17872;18028;18091;18616;20319;20416;209011;212712;21413;224829;22658;328274;332110;385674;387609;52477;54131;56698;57314;58805;68837;72720;75284;79362;99311	Aebp1;Zfhx3;Bcl6b;Prdm1;Cav1;Runx1;Cbx2;Ccnd3;Esr2;Igf2;Ppp1r15a;Nfib;Nkx2-5;Peg3;Sfrp2;Shc1;Sirt7;Satb2;Tcf4;Trerf1;Pcgf2;Zfp459;Mapk15;Zfp174;Zhx2;Angel2;Irf3;Phax;Nelfcd;Mlxipl;Foxk2;Zfp248;Bcdin3d;Bhlhe41;Commd7	2.56% (35/1367)	0.0710473	1.15	NA	NA
2			3.53	GO:0006357	regulation of transcription by RNA polymerase II	Any process that modulates the frequency, rate or extent of transcription mediated by RNA polymerase II.	2.31% (54/2341)	0.00612485	2.21	11555;11568;11906;12029;12142;12389;12394;12416;12445;13593;13983;14652;14683;14842;16002;17872;18028;18091;18514;18616;20319;209011;211151;212712;21413;214133;216154;224691;224829;22658;226641;235047;245263;26901;328274;330502;332110;381373;385674;387609;53314;54131;550619;57314;58805;66172;68837;68992;69790;72720;75736;76900;79362;93837	Adrb2;Aebp1;Zfhx3;Bcl6b;Prdm1;Cav1;Runx1;Cbx2;Ccnd3;Ebf3;Esr2;Glp1r;Gnas;Gsx1;Igf2;Ppp1r15a;Nfib;Nkx2-5;Pbx1;Peg3;Sfrp2;Sirt7;Churc1;Satb2;Tcf4;Tet2;Med16;Zfp472;Trerf1;Pcgf2;Atf6;Zfp809;Gm4981;Ss18l2;Zfp459;Zfp82;Mapk15;Sp9;Zfp174;Zhx2;Batf;Irf3;Arid3c;Nelfcd;Mlxipl;Med11;Foxk2;Zfp580;Med30;Zfp248;Bcl2l12;Ssbp4;Bhlhe41;Dach2	2.48% (58/2341)	0.0425411	1.37	NA	NA
2			4.89	GO:0000122	negative regulation of transcription by RNA polymerase II	Any process that stops, prevents, or reduces the frequency, rate or extent of transcription mediated by RNA polymerase II.	2.84% (27/951)	0.00409327	2.39	11568;11906;12029;12142;12389;12394;12416;12445;13983;16002;17872;18028;18091;18616;209011;212712;21413;22658;328274;332110;385674;387609;54131;57314;58805;72720;79362	Aebp1;Zfhx3;Bcl6b;Prdm1;Cav1;Runx1;Cbx2;Ccnd3;Esr2;Igf2;Ppp1r15a;Nfib;Nkx2-5;Peg3;Sirt7;Satb2;Tcf4;Pcgf2;Zfp459;Mapk15;Zfp174;Zhx2;Irf3;Nelfcd;Mlxipl;Zfp248;Bhlhe41	2.73% (26/951)	0.0606196	1.22	NA	NA
2			4.4	GO:0045892	negative regulation of transcription, DNA-templated	Any process that stops, prevents, or reduces the frequency, rate or extent of cellular DNA-templated transcription.	2.56% (32/1252)	0.00861946	2.06	11568;11906;12029;12142;12389;12394;12416;12445;13983;16002;17872;18028;18091;18616;20319;20416;209011;212712;21413;224829;22658;328274;332110;385674;387609;54131;57314;58805;68837;72720;79362;99311	Aebp1;Zfhx3;Bcl6b;Prdm1;Cav1;Runx1;Cbx2;Ccnd3;Esr2;Igf2;Ppp1r15a;Nfib;Nkx2-5;Peg3;Sfrp2;Shc1;Sirt7;Satb2;Tcf4;Trerf1;Pcgf2;Zfp459;Mapk15;Zfp174;Zhx2;Irf3;Nelfcd;Mlxipl;Foxk2;Zfp248;Bhlhe41;Commd7	2.56% (32/1252)	0.0830876	1.08	NA	NA
2			4.4	GO:1902679	negative regulation of RNA biosynthetic process	NA	2.55% (32/1257)	0.00910449	2.04	11568;11906;12029;12142;12389;12394;12416;12445;13983;16002;17872;18028;18091;18616;20319;20416;209011;212712;21413;224829;22658;328274;332110;385674;387609;54131;57314;58805;68837;72720;79362;99311	Aebp1;Zfhx3;Bcl6b;Prdm1;Cav1;Runx1;Cbx2;Ccnd3;Esr2;Igf2;Ppp1r15a;Nfib;Nkx2-5;Peg3;Sfrp2;Shc1;Sirt7;Satb2;Tcf4;Trerf1;Pcgf2;Zfp459;Mapk15;Zfp174;Zhx2;Irf3;Nelfcd;Mlxipl;Foxk2;Zfp248;Bhlhe41;Commd7	2.55% (32/1257)	0.0864303	1.06	NA	NA
2			4.4	GO:1903507	negative regulation of nucleic acid-templated transcription	NA	2.55% (32/1256)	0.00900572	2.05	11568;11906;12029;12142;12389;12394;12416;12445;13983;16002;17872;18028;18091;18616;20319;20416;209011;212712;21413;224829;22658;328274;332110;385674;387609;54131;57314;58805;68837;72720;79362;99311	Aebp1;Zfhx3;Bcl6b;Prdm1;Cav1;Runx1;Cbx2;Ccnd3;Esr2;Igf2;Ppp1r15a;Nfib;Nkx2-5;Peg3;Sfrp2;Shc1;Sirt7;Satb2;Tcf4;Trerf1;Pcgf2;Zfp459;Mapk15;Zfp174;Zhx2;Irf3;Nelfcd;Mlxipl;Foxk2;Zfp248;Bhlhe41;Commd7	2.55% (32/1256)	0.0857545	1.07	NA	NA
3		Regulation of metabolic process	9	GO:1904406	negative regulation of nitric oxide metabolic process	NA	15.79% (3/19)	0.00346736	2.46	11433;12389;19223	Acp5;Cav1;Ptgis	0% (0/19)	1	0	NA	NA
3			9	GO:0045019	negative regulation of nitric oxide biosynthetic process	Any process that stops, prevents, or reduces the frequency, rate or extent of the chemical reactions and pathways resulting in the formation of nitric oxide.	15.79% (3/19)	0.00346736	2.46	11433;12389;19223	Acp5;Cav1;Ptgis	0% (0/19)	1	0	NA	NA
3			7.68	GO:0045428	regulation of nitric oxide biosynthetic process	Any process that modulates the frequency, rate or extent of the chemical reactions and pathways resulting in the formation of nitric oxide.	7.04% (5/71)	0.00615295	2.21	11433;11898;12389;19223;53791	Acp5;Ass1;Cav1;Ptgis;Tlr5	1.41% (1/71)	0.75829	0.12	NA	NA
3			7.47	GO:0010507	negative regulation of autophagy	Any process that stops, prevents, or reduces the frequency, rate or extent of autophagy. Autophagy is the process in which cells digest parts of their own cytoplasm.	2.78% (2/72)	0.330136	0.48	NA	NA	8.33% (6/72)	0.00300343	2.52	100502698;15368;22059;22084;230674;83669	Rubcn;Hmox1;Trp53;Tsc2;Kdm4a;Wdr6
3			8.23	GO:0016242	negative regulation of macroautophagy	Any process that stops, prevents, or reduces the frequency, rate or extent of macroautophagy.	0% (0/32)	1	0	NA	NA	12.5% (4/32)	0.00349728	2.46	100502698;15368;22059;22084	Rubcn;Hmox1;Trp53;Tsc2
3			2.85	GO:0031326	regulation of cellular biosynthetic process	Any process that modulates the frequency, rate or extent of the chemical reactions and pathways resulting in the formation of substances, carried out by individual cells.	2.27% (85/3743)	0.000809566	3.09	11428;11433;11555;11568;11898;11906;11977;12029;12142;12286;12389;12394;12416;12445;12724;13593;13983;14130;14652;14683;14842;15511;16002;16847;17855;17872;18028;18091;18514;18616;19223;194952;19735;20319;20416;209011;211151;212712;213696;21413;214133;216154;216853;217069;224691;224829;22658;226641;227358;231506;234384;235047;245263;26901;27273;328274;330502;332110;381373;385674;387609;53314;5379…	Aco1;Acp5;Adrb2;Aebp1;Ass1;Zfhx3;Atp7a;Bcl6b;Prdm1;Cacna1a;Cav1;Runx1;Cbx2;Ccnd3;Clcn2;Ebf3;Esr2;Fcgr2b;Glp1r;Gnas;Gsx1;Hspa1b;Igf2;Lepr;Mvk;Ppp1r15a;Nfib;Nkx2-5;Pbx1;Peg3;Ptgis;Jmjd4;Rgs2;Sfrp2;Shc1;Sirt7;Churc1;Satb2;Duoxa1;Tcf4;Tet2;Med16;Wrap53;Trim25;Zfp472;Trerf1;Pcgf2;Atf6;Erfe;Lin54;Mpv17l2;Zfp809;Gm4981;Ss18l2;Pdk4;Zfp459;Zfp82;Mapk15;Sp9;Zfp174;Zhx2;Batf;Tlr5;Irf3;Arid3c;Fzd2;Nelfcd;Mlx…	2.32% (87/3743)	0.0563052	1.25	NA	NA
3			4.2	GO:0031327	negative regulation of cellular biosynthetic process	Any process that stops, prevents, or reduces the frequency, rate or extent of the chemical reactions and pathways resulting in the formation of substances, carried out by individual cells.	2.59% (40/1545)	0.00276862	2.56	11433;11568;11906;12029;12142;12286;12389;12394;12416;12445;13983;16002;16847;17855;17872;18028;18091;18616;19223;19735;20319;20416;209011;212712;21413;224829;22658;227358;328274;332110;385674;387609;54131;57314;58805;622408;68837;72720;79362;99311	Acp5;Aebp1;Zfhx3;Bcl6b;Prdm1;Cacna1a;Cav1;Runx1;Cbx2;Ccnd3;Esr2;Igf2;Lepr;Mvk;Ppp1r15a;Nfib;Nkx2-5;Peg3;Ptgis;Rgs2;Sfrp2;Shc1;Sirt7;Satb2;Tcf4;Trerf1;Pcgf2;Erfe;Zfp459;Mapk15;Zfp174;Zhx2;Irf3;Nelfcd;Mlxipl;Mcidas;Foxk2;Zfp248;Bhlhe41;Commd7	2.33% (36/1545)	0.173132	0.76	NA	NA
3			3.13	GO:0031325	positive regulation of cellular metabolic process	Any process that activates or increases the frequency, rate or extent of the chemical reactions and pathways by which individual cells transform chemical substances.	2.1% (72/3429)	0.0142781	1.85	NA	NA	2.62% (90/3429)	0.00258779	2.59	104156;107607;107829;109270;11474;11758;11785;11898;11921;12028;12367;12388;12850;12905;13033;13199;13636;13654;13712;13983;15227;15368;16002;16363;16971;170787;17314;18003;18189;18424;19156;19186;19205;19698;20429;20678;208647;20877;209200;212712;21413;216154;21672;21678;216853;21937;22059;22084;224045;224619;225631;225998;226251;231279;23922;268860;270190;27403;320207;320924;50883;50929;52163;5…	Etv5;Nod1;Thoc5;Prr5;Actn3;Prdx6;Apbb1;Ass1;Atoh1;Bax;Casp3;Ctnnd1;Coq7;Cradd;Ctsd;Ddn;Efna1;Egr2;Elk1;Esr2;Foxf1;Hmox1;Igf2;Irf2;Lrp1;Hdac10;Mgmt;Nedd9;Nrxn1;Otx2;Psap;Psme1;Ptbp1;Relb;Shox2;Sox5;Creb3l2;Aurkb;Dtx3l;Satb2;Tcf4;Med16;Prdx2;Tead3;Wrap53;Tnfrsf1a;Trp53;Tsc2;Eif2b5;Traf7;Onecut2;Rorb;Ablim1;Guf1;Jtb;Abat;Ephb1;Abca7;Pik3r5;Ccbe1;Chek2;Il22;Camk1;Cbx7;Nucb2;Irf3;Parp14;Akap8;Trip4;Pp…
3			2.29	GO:0031323	regulation of cellular metabolic process	Any process that modulates the frequency, rate or extent of the chemical reactions and pathways by which individual cells transform chemical substances.	2.19% (128/5845)	0.000105122	3.98	103743;11428;11433;11474;11539;11555;11568;11640;11898;11906;11977;12029;12142;12286;12305;12380;12389;12394;12416;12445;12683;12724;13033;13593;13867;13983;14130;14652;14683;14800;14842;15511;16002;16847;17309;17311;17855;17872;18028;18091;18260;18514;18616;19223;192652;194952;19735;20319;20320;20416;209011;20971;211151;212712;213696;21413;214133;216154;216853;217011;217069;22067;224691;224829;2…	Tmem98;Aco1;Acp5;Actn3;Adora1;Adrb2;Aebp1;Akap1;Ass1;Zfhx3;Atp7a;Bcl6b;Prdm1;Cacna1a;Ddr1;Cast;Cav1;Runx1;Cbx2;Ccnd3;Cidea;Clcn2;Ctsd;Ebf3;Erbb3;Esr2;Fcgr2b;Glp1r;Gnas;Gria2;Gsx1;Hspa1b;Igf2;Lepr;Mgat3;Kitl;Mvk;Ppp1r15a;Nfib;Nkx2-5;Ocln;Pbx1;Peg3;Ptgis;Wdr81;Jmjd4;Rgs2;Sfrp2;Nptn;Shc1;Sirt7;Sdc4;Churc1;Satb2;Duoxa1;Tcf4;Tet2;Med16;Wrap53;Nle1;Trim25;Trpc5;Zfp472;Trerf1;Pcgf2;Atf6;Erfe;Lrsam1;Smg5…	2.38% (139/5845)	0.00688619	2.16	100336;100502698;104156;107568;107607;107829;109270;11474;11757;11758;11785;11898;11921;12028;12142;12367;12388;12850;12905;13033;13162;13199;13636;13654;13712;13983;14158;14609;14705;15227;15368;15373;15397;16002;16363;16599;16971;17035;170787;170936;17314;18003;18189;18424;19156;19186;19205;19698;20193;20429;20678;20714;208647;20877;209200;209378;210104;212712;21413;216154;21672;21678;216853;21…	Ppp1r8;Rubcn;Etv5;Wwp1;Nod1;Thoc5;Prr5;Actn3;Prdx3;Prdx6;Apbb1;Ass1;Atoh1;Bax;Prdm1;Casp3;Ctnnd1;Coq7;Cradd;Ctsd;Slc6a3;Ddn;Efna1;Egr2;Elk1;Esr2;Fer;Gja1;Bscl2;Foxf1;Hmox1;Hmx3;Hoxa11os;Igf2;Irf2;Klf3;Lrp1;Lxn;Hdac10;Zfp369;Mgmt;Nedd9;Nrxn1;Otx2;Psap;Psme1;Ptbp1;Relb;S100a1;Shox2;Sox5;Serpina3k;Creb3l2;Aurkb;Dtx3l;Itih5;Zfp658;Satb2;Tcf4;Med16;Prdx2;Tead3;Wrap53;Tnfrsf1a;Trp53;Tsc2;Tyms;Eif2b5;Tr…
3			3.6	GO:0031324	negative regulation of cellular metabolic process	Any process that stops, prevents, or reduces the frequency, rate or extent of the chemical reactions and pathways by which individual cells transform chemical substances.	2.44% (63/2578)	0.0007449	3.13	103743;11433;11474;11568;11640;11906;11977;12029;12142;12286;12380;12389;12394;12416;12445;13983;15511;16002;16847;17309;17855;17872;18028;18091;18260;18616;19223;19735;20319;20416;209011;212712;21413;217011;224829;22658;227358;241289;260302;26569;328274;332110;333433;385674;387609;394436;52477;54131;554327;56177;56698;57314;58805;622408;67603;68082;68837;72720;74769;75284;75736;79362;99311	Tmem98;Acp5;Actn3;Aebp1;Akap1;Zfhx3;Atp7a;Bcl6b;Prdm1;Cacna1a;Cast;Cav1;Runx1;Cbx2;Ccnd3;Esr2;Hspa1b;Igf2;Lepr;Mgat3;Mvk;Ppp1r15a;Nfib;Nkx2-5;Ocln;Peg3;Ptgis;Rgs2;Sfrp2;Shc1;Sirt7;Satb2;Tcf4;Nle1;Trerf1;Pcgf2;Erfe;Ppp1r26;Gga3;Slc27a4;Zfp459;Mapk15;Gpd1l;Zfp174;Zhx2;Ugt1a1;Angel2;Irf3;2610042L04Rik;Olfm1;Phax;Nelfcd;Mlxipl;Mcidas;Dusp6;Dusp19;Foxk2;Zfp248;Pik3cb;Bcdin3d;Bcl2l12;Bhlhe41;Commd7	2.44% (63/2578)	0.0445666	1.35	NA	NA
3			6.51	GO:0006109	regulation of carbohydrate metabolic process	Any process that modulates the frequency, rate or extent of the chemical reactions and pathways involving carbohydrates.	4.55% (9/198)	0.00549222	2.26	11474;16002;16847;209011;227358;27273;394436;58805;68837	Actn3;Igf2;Lepr;Sirt7;Erfe;Pdk4;Ugt1a1;Mlxipl;Foxk2	2.02% (4/198)	0.552293	0.26	NA	NA
3			2.34	GO:0080090	regulation of primary metabolic process	Any process that modulates the frequency, rate or extent of the chemical reactions and pathways within a cell or an organism involving those compounds formed as a part of the normal anabolic and catabolic processes. These processes take place in most, if not all, cells of the organism.	2.1% (119/5662)	0.00113543	2.94	103743;11428;11474;11539;11555;11568;11640;11906;11977;12029;12142;12286;12380;12389;12394;12416;12445;12683;12724;13033;13593;13867;13983;14130;14652;14683;14842;15511;16002;16847;16913;17309;17311;17855;17872;18028;18091;18260;18514;18616;19223;192652;194952;19735;20319;20320;20416;209011;20971;211151;212712;21413;214133;216154;216853;217011;217069;22067;224691;224829;22658;226641;227358;229512…	Tmem98;Aco1;Actn3;Adora1;Adrb2;Aebp1;Akap1;Zfhx3;Atp7a;Bcl6b;Prdm1;Cacna1a;Cast;Cav1;Runx1;Cbx2;Ccnd3;Cidea;Clcn2;Ctsd;Ebf3;Erbb3;Esr2;Fcgr2b;Glp1r;Gnas;Gsx1;Hspa1b;Igf2;Lepr;Psmb8;Mgat3;Kitl;Mvk;Ppp1r15a;Nfib;Nkx2-5;Ocln;Pbx1;Peg3;Ptgis;Wdr81;Jmjd4;Rgs2;Sfrp2;Nptn;Shc1;Sirt7;Sdc4;Churc1;Satb2;Tcf4;Tet2;Med16;Wrap53;Nle1;Trim25;Trpc5;Zfp472;Trerf1;Pcgf2;Atf6;Erfe;Smg5;Lin54;Mpv17l2;Zfp809;Gm4981;…	2.4% (136/5662)	0.00535173	2.27	100336;100502698;104156;107568;107607;107829;109270;11474;11757;11758;11785;11921;12028;12142;12367;12388;12850;12905;13033;13162;13199;13636;13654;13712;13983;14158;14609;14705;15227;15368;15373;15397;16002;16363;16599;16912;16913;16971;17035;170787;170936;17314;18003;18189;18424;19156;19186;19205;19698;20193;20429;20678;20714;208647;20877;209200;209378;210104;212712;21413;216154;21672;21678;216…	Ppp1r8;Rubcn;Etv5;Wwp1;Nod1;Thoc5;Prr5;Actn3;Prdx3;Prdx6;Apbb1;Atoh1;Bax;Prdm1;Casp3;Ctnnd1;Coq7;Cradd;Ctsd;Slc6a3;Ddn;Efna1;Egr2;Elk1;Esr2;Fer;Gja1;Bscl2;Foxf1;Hmox1;Hmx3;Hoxa11os;Igf2;Irf2;Klf3;Psmb9;Psmb8;Lrp1;Lxn;Hdac10;Zfp369;Mgmt;Nedd9;Nrxn1;Otx2;Psap;Psme1;Ptbp1;Relb;S100a1;Shox2;Sox5;Serpina3k;Creb3l2;Aurkb;Dtx3l;Itih5;Zfp658;Satb2;Tcf4;Med16;Prdx2;Tead3;Wrap53;Tnfrsf1a;Trp53;Tsc2;Tyms;Ei…
3			6.92	GO:0010906	regulation of glucose metabolic process	Any process that modulates the rate, frequency or extent of glucose metabolism. Glucose metabolic processes are the chemical reactions and pathways involving glucose, the aldohexose gluco-hexose.	5.3% (7/132)	0.00611403	2.21	11474;16002;16847;209011;227358;27273;68837	Actn3;Igf2;Lepr;Sirt7;Erfe;Pdk4;Foxk2	2.27% (3/132)	0.485979	0.31	NA	NA
3			6.7	GO:0010675	regulation of cellular carbohydrate metabolic process	Any process that modulates the rate, extent or frequency of the chemical reactions and pathways involving carbohydrates, any of a group of organic compounds based of the general formula Cx(H2O)y, as carried out by individual cells.	4.85% (8/165)	0.0059345	2.23	11474;16002;16847;209011;227358;27273;394436;68837	Actn3;Igf2;Lepr;Sirt7;Erfe;Pdk4;Ugt1a1;Foxk2	1.82% (3/165)	0.63643	0.2	NA	NA
3			8.06	GO:0010677	negative regulation of cellular carbohydrate metabolic process	Any process that decreases the rate, extent or frequency of the chemical reactions and pathways involving carbohydrates, any of a group of organic compounds based of the general formula Cx(H2O)y, as carried out by individual cells.	8.16% (4/49)	0.00837587	2.08	11474;16847;227358;394436	Actn3;Lepr;Erfe;Ugt1a1	2.04% (1/49)	0.624512	0.2	NA	NA
3			2.38	GO:0051171	regulation of nitrogen compound metabolic process	Any process that modulates the frequency, rate or extent of the chemical reactions and pathways involving nitrogen or nitrogenous compounds.	2.15% (118/5488)	0.000493437	3.31	103743;11428;11433;11474;11539;11555;11568;11640;11898;11906;11977;12029;12142;12286;12380;12389;12394;12416;12445;12683;13033;13593;13867;13983;14130;14652;14683;14842;15511;16002;16847;16913;17309;17311;17855;17872;18028;18091;18260;18514;18616;19223;194952;19735;20319;20320;20416;209011;20971;211151;212712;213696;21413;214133;216154;216853;217011;217069;22067;224691;224829;22658;226641;229512;…	Tmem98;Aco1;Acp5;Actn3;Adora1;Adrb2;Aebp1;Akap1;Ass1;Zfhx3;Atp7a;Bcl6b;Prdm1;Cacna1a;Cast;Cav1;Runx1;Cbx2;Ccnd3;Cidea;Ctsd;Ebf3;Erbb3;Esr2;Fcgr2b;Glp1r;Gnas;Gsx1;Hspa1b;Igf2;Lepr;Psmb8;Mgat3;Kitl;Mvk;Ppp1r15a;Nfib;Nkx2-5;Ocln;Pbx1;Peg3;Ptgis;Jmjd4;Rgs2;Sfrp2;Nptn;Shc1;Sirt7;Sdc4;Churc1;Satb2;Duoxa1;Tcf4;Tet2;Med16;Wrap53;Nle1;Trim25;Trpc5;Zfp472;Trerf1;Pcgf2;Atf6;Smg5;Lin54;Mpv17l2;Zfp809;Gm4981;…	2.46% (135/5488)	0.00227822	2.64	100336;104156;107568;107607;107829;109270;11474;11757;11758;11785;11898;11921;12028;12142;12367;12388;12850;12905;13033;13162;13199;13636;13654;13712;13983;14158;14609;15227;15368;15373;15397;16002;16363;16599;16912;16913;16971;17035;170787;170936;17314;18003;18189;18424;19156;19186;19205;19698;20193;20429;20678;20714;208647;20877;209200;209378;210104;212712;21413;216154;21672;21678;216853;21937;…	Ppp1r8;Etv5;Wwp1;Nod1;Thoc5;Prr5;Actn3;Prdx3;Prdx6;Apbb1;Ass1;Atoh1;Bax;Prdm1;Casp3;Ctnnd1;Coq7;Cradd;Ctsd;Slc6a3;Ddn;Efna1;Egr2;Elk1;Esr2;Fer;Gja1;Foxf1;Hmox1;Hmx3;Hoxa11os;Igf2;Irf2;Klf3;Psmb9;Psmb8;Lrp1;Lxn;Hdac10;Zfp369;Mgmt;Nedd9;Nrxn1;Otx2;Psap;Psme1;Ptbp1;Relb;S100a1;Shox2;Sox5;Serpina3k;Creb3l2;Aurkb;Dtx3l;Itih5;Zfp658;Satb2;Tcf4;Med16;Prdx2;Tead3;Wrap53;Tnfrsf1a;Trp53;Tsc2;Tyms;Eif2b5;Tr…
3			3.68	GO:0051172	negative regulation of nitrogen compound metabolic process	Any process that stops, prevents, or reduces the frequency, rate or extent of the chemical reactions and pathways involving nitrogen or nitrogenous compounds.	2.32% (56/2410)	0.00451537	2.35	103743;11433;11474;11568;11640;11906;11977;12029;12142;12380;12389;12394;12416;12445;13983;15511;16002;17309;17855;17872;18028;18091;18260;18616;19223;19735;20319;20416;209011;212712;21413;217011;224829;22658;260302;328274;332110;333433;385674;387609;52477;54131;554327;56177;56698;57314;58805;67603;68082;68837;72720;74769;75284;75736;79362;99311	Tmem98;Acp5;Actn3;Aebp1;Akap1;Zfhx3;Atp7a;Bcl6b;Prdm1;Cast;Cav1;Runx1;Cbx2;Ccnd3;Esr2;Hspa1b;Igf2;Mgat3;Mvk;Ppp1r15a;Nfib;Nkx2-5;Ocln;Peg3;Ptgis;Rgs2;Sfrp2;Shc1;Sirt7;Satb2;Tcf4;Nle1;Trerf1;Pcgf2;Gga3;Zfp459;Mapk15;Gpd1l;Zfp174;Zhx2;Angel2;Irf3;2610042L04Rik;Olfm1;Phax;Nelfcd;Mlxipl;Dusp6;Dusp19;Foxk2;Zfp248;Pik3cb;Bcdin3d;Bcl2l12;Bhlhe41;Commd7	2.49% (60/2410)	0.0364068	1.44	NA	NA
3			2.85	GO:0009893	positive regulation of metabolic process	Any process that activates or increases the frequency, rate or extent of the chemical reactions and pathways within a cell or an organism.	2.07% (82/3956)	0.0120168	1.92	NA	NA	2.6% (103/3956)	0.00154378	2.81	104156;107568;107607;107829;109270;11474;11758;11785;11898;11921;12028;12142;12367;12388;12850;12905;13033;13199;13636;13654;13712;13983;14297;14609;14705;15227;15368;16002;16363;16971;170787;17314;18003;18189;18424;18442;19156;19186;19205;19698;20193;20429;20678;208647;20877;209200;212712;21413;216154;21672;21678;216853;21937;22059;22084;22368;224045;22415;224619;225631;225998;226251;230674;2312…	Etv5;Wwp1;Nod1;Thoc5;Prr5;Actn3;Prdx6;Apbb1;Ass1;Atoh1;Bax;Prdm1;Casp3;Ctnnd1;Coq7;Cradd;Ctsd;Ddn;Efna1;Egr2;Elk1;Esr2;Fxn;Gja1;Bscl2;Foxf1;Hmox1;Igf2;Irf2;Lrp1;Hdac10;Mgmt;Nedd9;Nrxn1;Otx2;P2ry2;Psap;Psme1;Ptbp1;Relb;S100a1;Shox2;Sox5;Creb3l2;Aurkb;Dtx3l;Satb2;Tcf4;Med16;Prdx2;Tead3;Wrap53;Tnfrsf1a;Trp53;Tsc2;Trpv2;Eif2b5;Wnt3;Traf7;Onecut2;Rorb;Ablim1;Kdm4a;Guf1;Jtb;Abat;Ephb1;Abca7;Pik3r5;Ccbe…
3			3.23	GO:0051173	positive regulation of nitrogen compound metabolic process	Any process that activates or increases the frequency, rate or extent of the chemical reactions and pathways involving nitrogen or nitrogenous compounds.	2.04% (65/3187)	0.0342733	1.47	NA	NA	2.67% (85/3187)	0.00221831	2.65	104156;107568;107607;107829;109270;11758;11785;11898;11921;12028;12367;12388;12850;12905;13033;13199;13636;13654;13712;13983;14609;15227;16002;16363;16971;170787;17314;18003;18189;18424;19156;19186;19205;19698;20429;20678;208647;20877;209200;212712;21413;216154;21672;21678;216853;21937;22059;22084;224045;224619;225631;225998;226251;231279;23922;268860;27403;320207;320924;50883;50929;52163;52609;5…	Etv5;Wwp1;Nod1;Thoc5;Prr5;Prdx6;Apbb1;Ass1;Atoh1;Bax;Casp3;Ctnnd1;Coq7;Cradd;Ctsd;Ddn;Efna1;Egr2;Elk1;Esr2;Gja1;Foxf1;Igf2;Irf2;Lrp1;Hdac10;Mgmt;Nedd9;Nrxn1;Otx2;Psap;Psme1;Ptbp1;Relb;Shox2;Sox5;Creb3l2;Aurkb;Dtx3l;Satb2;Tcf4;Med16;Prdx2;Tead3;Wrap53;Tnfrsf1a;Trp53;Tsc2;Eif2b5;Traf7;Onecut2;Rorb;Ablim1;Guf1;Jtb;Abat;Abca7;Pik3r5;Ccbe1;Chek2;Il22;Camk1;Cbx7;Irf3;Parp14;Akap8;Trip4;Ppp2r3c;Fis1;Rwd…
3			2.82	GO:0009889	regulation of biosynthetic process	Any process that modulates the frequency, rate or extent of the chemical reactions and pathways resulting in the formation of substances.	2.25% (86/3818)	0.000963326	3.02	11428;11433;11555;11568;11898;11906;11977;12029;12142;12286;12389;12394;12416;12445;12724;13593;13983;14130;14652;14683;14718;14842;15511;16002;16847;17855;17872;18028;18091;18514;18616;19223;194952;19735;20319;20416;209011;211151;212712;213696;21413;214133;216154;216853;217069;224691;224829;22658;226641;227358;231506;234384;235047;245263;26901;27273;328274;330502;332110;381373;385674;387609;5331…	Aco1;Acp5;Adrb2;Aebp1;Ass1;Zfhx3;Atp7a;Bcl6b;Prdm1;Cacna1a;Cav1;Runx1;Cbx2;Ccnd3;Clcn2;Ebf3;Esr2;Fcgr2b;Glp1r;Gnas;Got1;Gsx1;Hspa1b;Igf2;Lepr;Mvk;Ppp1r15a;Nfib;Nkx2-5;Pbx1;Peg3;Ptgis;Jmjd4;Rgs2;Sfrp2;Shc1;Sirt7;Churc1;Satb2;Duoxa1;Tcf4;Tet2;Med16;Wrap53;Trim25;Zfp472;Trerf1;Pcgf2;Atf6;Erfe;Lin54;Mpv17l2;Zfp809;Gm4981;Ss18l2;Pdk4;Zfp459;Zfp82;Mapk15;Sp9;Zfp174;Zhx2;Batf;Tlr5;Irf3;Arid3c;Fzd2;Nelfc…	2.28% (87/3818)	0.0818685	1.09	NA	NA
3			4.18	GO:0009890	negative regulation of biosynthetic process	Any process that stops, prevents, or reduces the rate of the chemical reactions and pathways resulting in the formation of substances.	2.59% (41/1586)	0.00252083	2.6	11433;11568;11906;12029;12142;12286;12389;12394;12416;12445;13983;14718;16002;16847;17855;17872;18028;18091;18616;19223;19735;20319;20416;209011;212712;21413;224829;22658;227358;328274;332110;385674;387609;54131;57314;58805;622408;68837;72720;79362;99311	Acp5;Aebp1;Zfhx3;Bcl6b;Prdm1;Cacna1a;Cav1;Runx1;Cbx2;Ccnd3;Esr2;Got1;Igf2;Lepr;Mvk;Ppp1r15a;Nfib;Nkx2-5;Peg3;Ptgis;Rgs2;Sfrp2;Shc1;Sirt7;Satb2;Tcf4;Trerf1;Pcgf2;Erfe;Zfp459;Mapk15;Zfp174;Zhx2;Irf3;Nelfcd;Mlxipl;Mcidas;Foxk2;Zfp248;Bhlhe41;Commd7	2.27% (36/1586)	0.216061	0.67	NA	NA
3			7.82	GO:0032350	regulation of hormone metabolic process	Any process that modulates the frequency, rate or extent of the chemical reactions and pathways involving any hormone.	8.62% (5/58)	0.00257202	2.59	12286;12724;16002;213696;26569	Cacna1a;Clcn2;Igf2;Duoxa1;Slc27a4	1.72% (1/58)	0.686412	0.16	NA	NA
3			5.74	GO:0062012	regulation of small molecule metabolic process	Any process that modulates the rate, frequency or extent of a small molecule metabolic process.	3.45% (13/377)	0.0096654	2.01	11474;12286;12389;12724;16002;16847;209011;227358;26569;27273;394436;58805;68837	Actn3;Cacna1a;Cav1;Clcn2;Igf2;Lepr;Sirt7;Erfe;Slc27a4;Pdk4;Ugt1a1;Mlxipl;Foxk2	1.86% (7/377)	0.619162	0.21	NA	NA
3			3.28	GO:0009892	negative regulation of metabolic process	Any process that stops, prevents, or reduces the frequency, rate or extent of the chemical reactions and pathways within a cell or an organism.	2.28% (72/3155)	0.00195394	2.71	103743;11433;11474;11539;11568;11640;11906;11977;12029;12142;12286;12380;12389;12394;12416;12445;12683;13983;14130;14718;15511;16002;16847;17309;17855;17872;18028;18091;18260;18616;19223;194952;19735;20319;20320;20416;209011;212712;21413;217011;224829;22658;227358;229512;241289;260302;26569;328274;332110;333433;385674;387609;394436;52477;54131;554327;56177;56698;57314;58805;622408;66394;67603;680…	Tmem98;Acp5;Actn3;Adora1;Aebp1;Akap1;Zfhx3;Atp7a;Bcl6b;Prdm1;Cacna1a;Cast;Cav1;Runx1;Cbx2;Ccnd3;Cidea;Esr2;Fcgr2b;Got1;Hspa1b;Igf2;Lepr;Mgat3;Mvk;Ppp1r15a;Nfib;Nkx2-5;Ocln;Peg3;Ptgis;Jmjd4;Rgs2;Sfrp2;Nptn;Shc1;Sirt7;Satb2;Tcf4;Nle1;Trerf1;Pcgf2;Erfe;Smg5;Ppp1r26;Gga3;Slc27a4;Zfp459;Mapk15;Gpd1l;Zfp174;Zhx2;Ugt1a1;Angel2;Irf3;2610042L04Rik;Olfm1;Phax;Nelfcd;Mlxipl;Mcidas;Nosip;Dusp6;Dusp19;Foxk2;P…	2.41% (76/3155)	0.0378075	1.42	NA	NA
3			2.03	GO:0019222	regulation of metabolic process	Any process that modulates the frequency, rate or extent of the chemical reactions and pathways within a cell or an organism.	2% (134/6687)	0.00326272	2.49	103743;11428;11433;11474;11539;11555;11568;11640;11898;11906;11977;12029;12142;12286;12305;12380;12389;12394;12416;12445;12683;12724;13033;13593;13867;13983;14130;14652;14683;14718;14800;14842;15511;16002;16847;16913;170439;17309;17311;17855;17872;18028;18091;18260;18514;18616;19223;192652;194952;19735;20319;20320;20416;209011;20971;211151;212712;213696;21413;214133;216154;216853;217011;217069;22…	Tmem98;Aco1;Acp5;Actn3;Adora1;Adrb2;Aebp1;Akap1;Ass1;Zfhx3;Atp7a;Bcl6b;Prdm1;Cacna1a;Ddr1;Cast;Cav1;Runx1;Cbx2;Ccnd3;Cidea;Clcn2;Ctsd;Ebf3;Erbb3;Esr2;Fcgr2b;Glp1r;Gnas;Got1;Gria2;Gsx1;Hspa1b;Igf2;Lepr;Psmb8;Elovl6;Mgat3;Kitl;Mvk;Ppp1r15a;Nfib;Nkx2-5;Ocln;Pbx1;Peg3;Ptgis;Wdr81;Jmjd4;Rgs2;Sfrp2;Nptn;Shc1;Sirt7;Sdc4;Churc1;Satb2;Duoxa1;Tcf4;Tet2;Med16;Wrap53;Nle1;Trim25;Trpc5;Wnt10a;Zfp472;Trerf1;Pc…	2.29% (153/6687)	0.0177643	1.75	NA	NA
4		Cellular metabolic process	7.51	GO:0019692	deoxyribose phosphate metabolic process	The chemical reactions and pathways involving deoxyribose phosphate, the phosphorylated sugar 2-deoxy-erythro-pentose.	2.17% (1/46)	0.532235	0.27	NA	NA	10.87% (5/46)	0.00207822	2.68	107569;18103;22171;382985;66422	Nt5c3;Nme2;Tyms;Rrm2b;Dctpp1
4			8.64	GO:0046385	deoxyribose phosphate biosynthetic process	The chemical reactions and pathways resulting in the formation of deoxyribose phosphate, the phosphorylated sugar 2-deoxy-erythro-pentose.	0% (0/16)	1	0	NA	NA	18.75% (3/16)	0.00354905	2.45	18103;22171;382985	Nme2;Tyms;Rrm2b
4			3.04	GO:0006796	phosphate-containing compound metabolic process	The chemical reactions and pathways involving the phosphate group, the anion or salt of any phosphoric acid.	2.22% (67/3017)	0.00544128	2.26	107569;107589;11433;11474;11539;11555;11640;11790;11977;12305;12389;12445;12651;13867;13983;14130;14683;15356;16002;16772;16847;17311;17855;17872;18260;19134;192652;19266;19267;19735;20319;20320;20416;20971;21351;22067;223646;226646;229512;234515;23827;23920;23971;241289;269019;27273;320119;332110;333433;338372;52538;546071;554327;56089;56421;57869;58805;67111;67112;67126;67603;68082;68440;68837;…	Nt5c3;Mylk;Acp5;Actn3;Adora1;Adrb2;Akap1;Speg;Atp7a;Ddr1;Cav1;Ccnd3;Chkb;Erbb3;Esr2;Fcgr2b;Gnas;Hmgcl;Igf2;Lama1;Lepr;Kitl;Mvk;Ppp1r15a;Ocln;Prpf4b;Wdr81;Ptprd;Ptpre;Rgs2;Sfrp2;Nptn;Shc1;Sdc4;Taldo1;Trpc5;Naprt;Ndufs2;Smg5;Inpp4b;Bpnt1;Insrr;Papss1;Ppp1r26;Stk32a;Pdk4;Rps6kc1;Mapk15;Gpd1l;Map3k9;Acaa2;Mast3;2610042L04Rik;Ramp3;Pfkp;Adck2;Mlxipl;Naaa;Fgf22;Atp5e;Dusp6;Dusp19;Dusp23;Foxk2;Tom1l1;Pi…	2.88% (87/3017)	0.00016499	3.78	100336;100502698;100503915;107569;107607;109270;11302;11474;11757;11758;12028;12183;12367;12388;12716;12850;13175;13636;13983;140859;14158;14297;14705;14731;15356;16002;16971;17279;18003;18103;18189;19156;19205;19253;20877;216134;21672;21937;22059;22084;22171;224619;225887;228812;232339;23922;23954;23959;26889;270190;27403;320207;382051;382985;433486;50799;50883;50929;52163;54369;545622;547253;56…	Ppp1r8;Rubcn;Smpd5;Nt5c3;Nod1;Prr5;Aatk;Actn3;Prdx3;Prdx6;Bax;Bpgm;Casp3;Ctnnd1;Ckmt1;Coq7;Dclk1;Efna1;Esr2;Nek8;Fer;Fxn;Bscl2;Gpaa1;Hmgcl;Igf2;Lrp1;Melk;Nedd9;Nme2;Nrxn1;Psap;Ptbp1;Ptpn18;Aurkb;Pdxk;Prdx2;Tnfrsf1a;Trp53;Tsc2;Tyms;Traf7;Ndufs8;Pigu;Ankrd26;Jtb;Nek3;Nt5e;Cln8;Ephb1;Abca7;Pik3r5;Pdp2;Rrm2b;Gm14151;Slc25a13;Chek2;Il22;Camk1;Nme6;Ptpn3;Parp14;Akap8;Nme4;Ppp2r3c;Pigyl;Dctpp1;Cdk5rap1;…
4			5.59	GO:0016311	dephosphorylation	The process of removing one or more phosphoric (ester or anhydride) residues from a molecule.	3.77% (13/345)	0.00474604	2.32	11433;11539;11640;17872;19266;19267;229512;234515;23827;241289;67603;68082;68440	Acp5;Adora1;Akap1;Ppp1r15a;Ptprd;Ptpre;Smg5;Inpp4b;Bpnt1;Ppp1r26;Dusp6;Dusp19;Dusp23	2.03% (7/345)	0.525486	0.28	NA	NA
4			3.04	GO:0006793	phosphorus metabolic process	The chemical reactions and pathways involving the nonmetallic element phosphorus or compounds that contain phosphorus, usually in the form of a phosphate group (PO4).	2.21% (67/3036)	0.00627418	2.2	107569;107589;11433;11474;11539;11555;11640;11790;11977;12305;12389;12445;12651;13867;13983;14130;14683;15356;16002;16772;16847;17311;17855;17872;18260;19134;192652;19266;19267;19735;20319;20320;20416;20971;21351;22067;223646;226646;229512;234515;23827;23920;23971;241289;269019;27273;320119;332110;333433;338372;52538;546071;554327;56089;56421;57869;58805;67111;67112;67126;67603;68082;68440;68837;…	Nt5c3;Mylk;Acp5;Actn3;Adora1;Adrb2;Akap1;Speg;Atp7a;Ddr1;Cav1;Ccnd3;Chkb;Erbb3;Esr2;Fcgr2b;Gnas;Hmgcl;Igf2;Lama1;Lepr;Kitl;Mvk;Ppp1r15a;Ocln;Prpf4b;Wdr81;Ptprd;Ptpre;Rgs2;Sfrp2;Nptn;Shc1;Sdc4;Taldo1;Trpc5;Naprt;Ndufs2;Smg5;Inpp4b;Bpnt1;Insrr;Papss1;Ppp1r26;Stk32a;Pdk4;Rps6kc1;Mapk15;Gpd1l;Map3k9;Acaa2;Mast3;2610042L04Rik;Ramp3;Pfkp;Adck2;Mlxipl;Naaa;Fgf22;Atp5e;Dusp6;Dusp19;Dusp23;Foxk2;Tom1l1;Pi…	2.9% (88/3036)	0.000125447	3.9	100336;100502698;100503915;107569;107607;109270;11302;11474;11757;11758;12028;12183;12367;12388;12716;12850;13175;13636;13983;140859;14158;14297;14705;14731;15356;16002;16971;17279;18003;18103;18189;19156;19205;19253;20877;216134;21672;21937;22059;22084;22171;224619;225887;227620;228812;232339;23922;23954;23959;26889;270190;27403;320207;382051;382985;433486;50799;50883;50929;52163;54369;545622;54…	Ppp1r8;Rubcn;Smpd5;Nt5c3;Nod1;Prr5;Aatk;Actn3;Prdx3;Prdx6;Bax;Bpgm;Casp3;Ctnnd1;Ckmt1;Coq7;Dclk1;Efna1;Esr2;Nek8;Fer;Fxn;Bscl2;Gpaa1;Hmgcl;Igf2;Lrp1;Melk;Nedd9;Nme2;Nrxn1;Psap;Ptbp1;Ptpn18;Aurkb;Pdxk;Prdx2;Tnfrsf1a;Trp53;Tsc2;Tyms;Traf7;Ndufs8;Uap1l1;Pigu;Ankrd26;Jtb;Nek3;Nt5e;Cln8;Ephb1;Abca7;Pik3r5;Pdp2;Rrm2b;Gm14151;Slc25a13;Chek2;Il22;Camk1;Nme6;Ptpn3;Parp14;Akap8;Nme4;Ppp2r3c;Pigyl;Dctpp1;Cd…
4			4.39	GO:0019637	organophosphate metabolic process	The chemical reactions and pathways involving organophosphates, any phosphate-containing organic compound.	2.23% (20/896)	0.100598	1	NA	NA	3.57% (32/896)	0.00099239	3	100502698;100503915;107569;11474;11758;12183;12716;14705;14731;15356;18103;216134;22059;22171;228812;23959;26889;320207;382985;50799;54369;56520;66268;66422;67111;67292;67942;68738;68971;71795;72106;73724	Rubcn;Smpd5;Nt5c3;Actn3;Prdx6;Bpgm;Ckmt1;Bscl2;Gpaa1;Hmgcl;Nme2;Pdxk;Trp53;Tyms;Pigu;Nt5e;Cln8;Pik3r5;Rrm2b;Slc25a13;Nme6;Nme4;Pigyl;Dctpp1;Naaa;Pigc;Atp5g2;Acss1;Tamm41;Pitpnc1;Jmjd8;Mcee
4			8.03	GO:0006506	GPI anchor biosynthetic process	The chemical reactions and pathways resulting in the formation of a glycosylphosphatidylinositol (GPI) anchor that attaches some membrane proteins to the lipid bilayer of the cell membrane. The phosphatidylinositol group is linked via the C-6 hydroxyl residue of inositol to a carbohydrate chain which is itself linked to the protein via an ethanolamine phosphate group, its amino group forming an a…	0% (0/32)	1	0	NA	NA	12.5% (4/32)	0.00349728	2.46	14731;228812;66268;67292	Gpaa1;Pigu;Pigyl;Pigc
4			7.9	GO:0006505	GPI anchor metabolic process	The chemical reactions and pathways involving glycosylphosphatidylinositol anchors, molecular mechanisms for attaching membrane proteins to the lipid bilayer of cell membranes. Structurally they consist of a molecule of phosphatidylinositol to which is linked, via the C-6 hydroxyl of the inositol, a carbohydrate chain. This chain is in turn linked to the protein through an ethanolamine phosphate …	0% (0/34)	1	0	NA	NA	11.76% (4/34)	0.00437259	2.36	14731;228812;66268;67292	Gpaa1;Pigu;Pigyl;Pigc
4			5.86	GO:0006643	membrane lipid metabolic process	The chemical reactions and pathways involving membrane lipids, any lipid found in or associated with a biological membrane.	1.61% (3/186)	0.589424	0.23	NA	NA	5.38% (10/186)	0.00403743	2.39	100503915;12028;14731;19156;228812;26889;54447;66268;67111;67292	Smpd5;Bax;Gpaa1;Psap;Pigu;Cln8;Asah2;Pigyl;Naaa;Pigc
4			6.89	GO:0006664	glycolipid metabolic process	The chemical reactions and pathways involving glycolipids, a class of 1,2-di-O-acylglycerols joined at oxygen 3 by a glycosidic linkage to a carbohydrate part (usually a mono-, di- or tri-saccharide). Some substances classified as bacterial glycolipids have the sugar group acylated by one or more fatty acids and the glycerol group may be absent.	1.1% (1/91)	0.777888	0.11	NA	NA	6.59% (6/91)	0.00938277	2.03	12028;14731;19156;228812;66268;67292	Bax;Gpaa1;Psap;Pigu;Pigyl;Pigc
4			7.44	GO:0051187	cofactor catabolic process	The chemical reactions and pathways resulting in the breakdown of a cofactor, a substance that is required for the activity of an enzyme or other protein.	1.52% (1/66)	0.663991	0.18	NA	NA	7.58% (5/66)	0.00983325	2.01	11757;11758;15368;21672;50493	Prdx3;Prdx6;Hmox1;Prdx2;Txnrd1
4			5.18	GO:0006914	autophagy	The cellular catabolic process in which cells digest parts of their own cytoplasm; allows for both recycling of macromolecular constituents under conditions of cellular stress and remodeling the intracellular structure for cell differentiation.	3.29% (15/456)	0.00858229	2.07	100502841;11555;11938;13033;16847;192652;217893;226641;227738;332110;66795;68837;74735;74769;76932	Epg5;Adrb2;Atp2a2;Ctsd;Lepr;Wdr81;Pacs2;Atf6;Lrsam1;Mapk15;Atg10;Foxk2;Trim14;Pik3cb;Arfip2	3.51% (16/456)	0.0200396	1.7	NA	NA
4			3.68	GO:0044248	cellular catabolic process	The chemical reactions and pathways resulting in the breakdown of substances, carried out by individual cells.	2.33% (49/2100)	0.00729709	2.14	100502841;107569;110173;11555;11938;12036;12333;12389;12683;13033;14718;15356;15511;16847;16913;17309;192652;208982;213990;214133;216188;217069;217893;224530;226641;227738;229512;26569;268860;332110;387609;394436;50760;52477;52538;56698;57296;57775;58805;59012;66795;68837;68977;69241;74245;74735;74769;76932;80708	Epg5;Nt5c3;Manba;Adrb2;Atp2a2;Bcat2;Capn1;Cav1;Cidea;Ctsd;Got1;Hmgcl;Hspa1b;Lepr;Psmb8;Mgat3;Wdr81;Hmgcll1;Agap3;Tet2;Aldh1l2;Trim25;Pacs2;Acat3;Atf6;Lrsam1;Smg5;Slc27a4;Abat;Mapk15;Zhx2;Ugt1a1;Fbxo17;Angel2;Acaa2;Phax;Psmd8;Usp29;Mlxipl;Moxd1;Atg10;Foxk2;Haghl;Polr2d;Ctbs;Trim14;Pik3cb;Arfip2;Pacsin3	3.14% (66/2100)	0.000109557	3.96	100502698;100502841;100503915;107568;107569;107607;110078;11757;11758;12028;12367;12972;13033;13162;13636;13885;14705;15356;15368;16912;16913;16971;170787;17117;19125;19156;19186;209200;21672;22059;22084;230674;233902;237886;23959;26446;268860;26889;268933;269338;27403;50493;50880;50883;54447;545622;56404;57742;64138;64295;66373;66422;66437;67391;67710;69305;69957;71701;71723;71732;74245;75747;78…	Rubcn;Epg5;Smpd5;Wwp1;Nt5c3;Nod1;Pygb;Prdx3;Prdx6;Bax;Casp3;Cryz;Ctsd;Slc6a3;Efna1;Esd;Bscl2;Hmgcl;Hmox1;Psmb9;Psmb8;Lrp1;Hdac10;Amacr;Prodh;Psap;Psme1;Dtx3l;Prdx2;Trp53;Tsc2;Kdm4a;Fbxl19;Slfn9;Nt5e;Psmb3;Abat;Cln8;Wdr24;Vps39;Abca7;Txnrd1;Scly;Chek2;Asah2;Ptpn3;Trip4;Abhd1;Ctsz;Tmub1;Lsm5;Dctpp1;Fis1;Fundc2;Polr2g;Dcps;Cdc16;Pnpt1;Dhx34;Vps11;Ctbs;Sesn3;Cul9;Pacsin3;Cemip;Wdr6
4			8.35	GO:0042744	hydrogen peroxide catabolic process	The chemical reactions and pathways resulting in the breakdown of hydrogen peroxide (H2O2).	0% (0/30)	1	0	NA	NA	13.33% (4/30)	0.00274932	2.56	11757;11758;21672;50493	Prdx3;Prdx6;Prdx2;Txnrd1
4			7.88	GO:0017001	antibiotic catabolic process	The chemical reactions and pathways resulting in the breakdown of antibiotic, a substance produced by or derived from certain fungi, bacteria, and other organisms, that can destroy or inhibit the growth of other microorganisms.	1.89% (1/53)	0.583365	0.23	NA	NA	9.43% (5/53)	0.00388748	2.41	11757;11758;13885;21672;50493	Prdx3;Prdx6;Esd;Prdx2;Txnrd1
4			6.93	GO:0042737	drug catabolic process	The chemical reactions and pathways resulting in the breakdown of a drug, a substance used in the diagnosis, treatment or prevention of a disease.	1.68% (2/119)	0.582445	0.23	NA	NA	5.88% (7/119)	0.00949265	2.02	11757;11758;13162;21672;23959;50493;74245	Prdx3;Prdx6;Slc6a3;Prdx2;Nt5e;Txnrd1;Ctbs
4			7.27	GO:0022904	respiratory electron transport chain	A process in which a series of electron carriers operate together to transfer electrons from donors such as NADH and FADH2 to any of several different terminal electron acceptors to generate a transmembrane electrochemical gradient.	1.11% (1/90)	0.774177	0.11	NA	NA	6.67% (6/90)	0.00890848	2.05	12850;225887;50799;67892;78330;78830	Coq7;Ndufs8;Slc25a13;Coa6;Ndufv3;Slc25a12
4			6.1	GO:0015980	energy derivation by oxidation of organic compounds	The chemical reactions and pathways by which a cell derives energy from organic compounds; results in the oxidation of the compounds from which energy is released.	2.97% (8/269)	0.0758765	1.12	NA	NA	5.2% (14/269)	0.000999059	3	110078;11474;12028;12850;14297;14936;16002;22059;225887;50799;67892;71701;78330;78830	Pygb;Actn3;Bax;Coq7;Fxn;Gys1;Igf2;Trp53;Ndufs8;Slc25a13;Coa6;Pnpt1;Ndufv3;Slc25a12
4			6.59	GO:0045333	cellular respiration	The enzymatic release of energy from inorganic and organic compounds (especially carbohydrates and fats) which either requires oxygen (aerobic respiration) or does not (anaerobic respiration).	2.78% (5/180)	0.173548	0.76	NA	NA	5.56% (10/180)	0.0031995	2.49	11474;12028;12850;14297;225887;50799;67892;71701;78330;78830	Actn3;Bax;Coq7;Fxn;Ndufs8;Slc25a13;Coa6;Pnpt1;Ndufv3;Slc25a12
4			2.68	GO:0044271	cellular nitrogen compound biosynthetic process	The chemical reactions and pathways resulting in the formation of organic and inorganic nitrogenous compounds.	2.22% (95/4276)	0.00076134	3.12	107569;11428;11433;11555;11568;11898;11906;12029;12142;12389;12394;12416;12445;13593;13983;14130;14652;14683;14842;15511;16002;16865;17855;17872;18028;18091;18514;18616;19223;19285;194952;19735;20319;20416;209011;211151;212712;21413;214133;216154;216853;217069;223646;224691;224829;225215;22658;226641;231506;234384;235047;23971;241230;245263;245841;26901;269261;27273;328274;330502;332110;381373;38…	Nt5c3;Aco1;Acp5;Adrb2;Aebp1;Ass1;Zfhx3;Bcl6b;Prdm1;Cav1;Runx1;Cbx2;Ccnd3;Ebf3;Esr2;Fcgr2b;Glp1r;Gnas;Gsx1;Hspa1b;Igf2;Eif2d;Mvk;Ppp1r15a;Nfib;Nkx2-5;Pbx1;Peg3;Ptgis;Cavin1;Jmjd4;Rgs2;Sfrp2;Shc1;Sirt7;Churc1;Satb2;Tcf4;Tet2;Med16;Wrap53;Trim25;Naprt;Zfp472;Trerf1;Rsl24d1;Pcgf2;Atf6;Lin54;Mpv17l2;Zfp809;Papss1;St8sia6;Gm4981;Polr2h;Ss18l2;Rpl12;Pdk4;Zfp459;Zfp82;Mapk15;Sp9;Zfp174;Zhx2;Batf;Tlr5;Irf…	2.71% (116/4276)	0.000136422	3.87	100503915;104156;107045;107568;107569;107607;107829;11757;11785;11898;11921;12142;12850;13199;13636;13654;13712;13983;14158;14297;14609;15227;15368;15373;15397;16002;16363;16599;16865;170787;170936;18103;18424;19205;19698;19935;19944;20193;20429;20678;208647;20877;209200;210104;212712;21413;216134;216151;216154;21672;21678;216853;21937;22059;22084;22171;224045;224619;224694;225631;225895;225998;2…	Smpd5;Etv5;Lars;Wwp1;Nt5c3;Nod1;Thoc5;Prdx3;Apbb1;Ass1;Atoh1;Prdm1;Coq7;Ddn;Efna1;Egr2;Elk1;Esr2;Fer;Fxn;Gja1;Foxf1;Hmox1;Hmx3;Hoxa11os;Igf2;Irf2;Klf3;Eif2d;Hdac10;Zfp369;Nme2;Otx2;Ptbp1;Relb;Mrpl23;Rpl29;S100a1;Shox2;Sox5;Creb3l2;Aurkb;Dtx3l;Zfp658;Satb2;Tcf4;Pdxk;Polrmt;Med16;Prdx2;Tead3;Wrap53;Tnfrsf1a;Trp53;Tsc2;Tyms;Eif2b5;Traf7;Zfp81;Onecut2;Taf6l;Rorb;Ablim1;Zfp46;Uap1l1;Gatb;Kdm4a;Guf1;Fb…
4			2.23	GO:0034641	cellular nitrogen compound metabolic process	The chemical reactions and pathways involving various organic and inorganic nitrogenous compounds, as carried out by individual cells.	2.2% (128/5805)	7.60804e-05	4.12	107569;109077;11428;11433;11474;11555;11568;11834;11898;11906;11977;12029;12142;12286;12389;12394;12416;12445;12683;13593;13983;14130;14652;14683;14842;14872;15356;15511;16002;16865;17309;17855;17872;18028;18091;18514;18616;19134;19223;19285;194952;19735;20319;20416;209011;211151;212712;21413;214133;216154;216188;216853;217069;223646;224691;224829;225215;22658;226641;229512;231506;234384;235047;2…	Nt5c3;Ints5;Aco1;Acp5;Actn3;Adrb2;Aebp1;Aqr;Ass1;Zfhx3;Atp7a;Bcl6b;Prdm1;Cacna1a;Cav1;Runx1;Cbx2;Ccnd3;Cidea;Ebf3;Esr2;Fcgr2b;Glp1r;Gnas;Gsx1;Gstt2;Hmgcl;Hspa1b;Igf2;Eif2d;Mgat3;Mvk;Ppp1r15a;Nfib;Nkx2-5;Pbx1;Peg3;Prpf4b;Ptgis;Cavin1;Jmjd4;Rgs2;Sfrp2;Shc1;Sirt7;Churc1;Satb2;Tcf4;Tet2;Med16;Aldh1l2;Wrap53;Trim25;Naprt;Zfp472;Trerf1;Rsl24d1;Pcgf2;Atf6;Smg5;Lin54;Mpv17l2;Zfp809;Papss1;St8sia6;Gm4981;…	2.72% (158/5805)	3.00721e-06	5.52	100336;100503915;104156;107045;107522;107568;107569;107607;107829;11474;11757;11758;11785;11898;11921;12028;12142;12183;12367;12850;13162;13199;13636;13654;13712;13983;14158;14297;14609;15227;15356;15368;15373;15397;16002;16363;16535;16599;16865;170787;170936;17314;18103;18207;18424;19156;19205;19698;19935;19944;20193;20429;20678;208647;20877;209200;209584;210104;212712;21413;216134;216151;216154…	Ppp1r8;Smpd5;Etv5;Lars;Ece2;Wwp1;Nt5c3;Nod1;Thoc5;Actn3;Prdx3;Prdx6;Apbb1;Ass1;Atoh1;Bax;Prdm1;Bpgm;Casp3;Coq7;Slc6a3;Ddn;Efna1;Egr2;Elk1;Esr2;Fer;Fxn;Gja1;Foxf1;Hmgcl;Hmox1;Hmx3;Hoxa11os;Igf2;Irf2;Kcnq1;Klf3;Eif2d;Hdac10;Zfp369;Mgmt;Nme2;Nthl1;Otx2;Psap;Ptbp1;Relb;Mrpl23;Rpl29;S100a1;Shox2;Sox5;Creb3l2;Aurkb;Dtx3l;Tyw3;Zfp658;Satb2;Tcf4;Pdxk;Polrmt;Med16;Prdx2;Tead3;Wrap53;Tnfrsf1a;Trp53;Tsc2;Ty…
4			4.39	GO:0043603	cellular amide metabolic process	The chemical reactions and pathways involving an amide, any derivative of an oxoacid in which an acidic hydroxy group has been replaced by an amino or substituted amino group, as carried out by individual cells.	2.73% (30/1100)	0.00450607	2.35	11428;11568;11898;14872;15356;16865;17309;17855;17872;194952;19735;216188;225215;234384;241230;260302;269261;27273;52538;56177;64657;66286;66292;67111;69241;71941;76687;77721;78796;83485	Aco1;Aebp1;Ass1;Gstt2;Hmgcl;Eif2d;Mgat3;Mvk;Ppp1r15a;Jmjd4;Rgs2;Aldh1l2;Rsl24d1;Mpv17l2;St8sia6;Gga3;Rpl12;Pdk4;Acaa2;Olfm1;Mrps10;Sec11c;Mrps21;Naaa;Polr2d;Cars2;Spcs3;Mrps5;Zcchc4;Ngrn	3% (33/1100)	0.0117688	1.93	NA	NA
4			5.32	GO:0017144	drug metabolic process	The chemical reactions and pathways involving a drug, a substance used in the diagnosis, treatment or prevention of a disease; as used here antibiotic substances (see antibiotic metabolism) are considered to be drugs, even if not used in medical or veterinary practice.	3.38% (18/532)	0.00314065	2.5	107569;11428;11433;11898;11977;12389;15356;19223;208982;213696;216188;268860;394436;53791;59012;67126;74245;77697	Nt5c3;Aco1;Acp5;Ass1;Atp7a;Cav1;Hmgcl;Ptgis;Hmgcll1;Duoxa1;Aldh1l2;Abat;Ugt1a1;Tlr5;Moxd1;Atp5e;Ctbs;Mmab	3.57% (19/532)	0.0100637	2	NA	NA
4			6.95	GO:0016999	antibiotic metabolic process	The chemical reactions and pathways involving an antibiotic, a substance produced by or derived from certain fungi, bacteria, and other organisms, that can destroy or inhibit the growth of other microorganisms.	2.52% (3/119)	0.30893	0.51	NA	NA	5.88% (7/119)	0.00949265	2.02	11671;11757;11758;13885;21672;50493;68738	Aldh3a2;Prdx3;Prdx6;Esd;Prdx2;Txnrd1;Acss1
4			2.33	GO:0006725	cellular aromatic compound metabolic process	The chemical reactions and pathways involving aromatic compounds, any organic compound characterized by one or more planar rings, each of which contains conjugated double bonds and delocalized pi electrons, as carried out by individual cells.	2.09% (109/5222)	0.00257352	2.59	107569;109077;11474;11555;11568;11834;11906;11977;12029;12142;12389;12394;12416;12445;12683;13593;13983;14130;14652;14683;14842;15356;15511;16002;17855;17872;18028;18091;18514;18616;19134;19223;19285;20319;20416;209011;211151;212712;213696;21413;214133;216154;216188;216853;217069;223646;224691;224829;22658;226641;229512;231506;235047;23971;245263;245841;268860;26901;27273;328274;330502;332110;381…	Nt5c3;Ints5;Actn3;Adrb2;Aebp1;Aqr;Zfhx3;Atp7a;Bcl6b;Prdm1;Cav1;Runx1;Cbx2;Ccnd3;Cidea;Ebf3;Esr2;Fcgr2b;Glp1r;Gnas;Gsx1;Hmgcl;Hspa1b;Igf2;Mvk;Ppp1r15a;Nfib;Nkx2-5;Pbx1;Peg3;Prpf4b;Ptgis;Cavin1;Sfrp2;Shc1;Sirt7;Churc1;Satb2;Duoxa1;Tcf4;Tet2;Med16;Aldh1l2;Wrap53;Trim25;Naprt;Zfp472;Trerf1;Pcgf2;Atf6;Smg5;Lin54;Zfp809;Papss1;Gm4981;Polr2h;Abat;Ss18l2;Pdk4;Zfp459;Zfp82;Mapk15;Sp9;Neil2;Kash5;Zfp174;Zh…	2.72% (142/5222)	1.39098e-05	4.86	100336;104156;107045;107568;107569;107607;107829;11474;11757;11758;11785;11921;12028;12142;12183;12367;12850;13162;13199;13636;13654;13712;13983;14158;14297;14609;15227;15356;15368;15373;15397;16002;16363;16535;16599;170787;170936;17314;18103;18207;18424;18948;19205;19698;20193;20429;20678;208647;20877;209200;209584;210104;212712;21413;216134;216151;216154;21672;21678;216853;21937;22059;22084;221…	Ppp1r8;Etv5;Lars;Wwp1;Nt5c3;Nod1;Thoc5;Actn3;Prdx3;Prdx6;Apbb1;Atoh1;Bax;Prdm1;Bpgm;Casp3;Coq7;Slc6a3;Ddn;Efna1;Egr2;Elk1;Esr2;Fer;Fxn;Gja1;Foxf1;Hmgcl;Hmox1;Hmx3;Hoxa11os;Igf2;Irf2;Kcnq1;Klf3;Hdac10;Zfp369;Mgmt;Nme2;Nthl1;Otx2;Pnmt;Ptbp1;Relb;S100a1;Shox2;Sox5;Creb3l2;Aurkb;Dtx3l;Tyw3;Zfp658;Satb2;Tcf4;Pdxk;Polrmt;Med16;Prdx2;Tead3;Wrap53;Tnfrsf1a;Trp53;Tsc2;Tyms;Traf7;Zfp81;Onecut2;Taf6l;Rorb;A…
4			5.54	GO:0006091	generation of precursor metabolites and energy	The chemical reactions and pathways resulting in the formation of precursor metabolites, substances from which energy is derived, and any process involved in the liberation of energy from these substances.	3.94% (17/432)	0.000833636	3.08	11428;11474;11977;14683;15356;16002;16847;208982;21351;216188;226646;239017;242700;56421;58805;67126;68837	Aco1;Actn3;Atp7a;Gnas;Hmgcl;Igf2;Lepr;Hmgcll1;Taldo1;Aldh1l2;Ndufs2;Ogdhl;Ifnlr1;Pfkp;Mlxipl;Atp5e;Foxk2	3.94% (17/432)	0.00587757	2.23	110078;11474;12028;12183;12850;14297;14936;15356;16002;22059;225887;50799;67892;71701;72106;78330;78830	Pygb;Actn3;Bax;Bpgm;Coq7;Fxn;Gys1;Hmgcl;Igf2;Trp53;Ndufs8;Slc25a13;Coa6;Pnpt1;Jmjd8;Ndufv3;Slc25a12
4			1.51	GO:0044237	cellular metabolic process	The chemical reactions and pathways by which individual cells transform chemical substances.	2.18% (215/9856)	1.10217e-08	7.96	100502841;103743;107569;107589;109077;110173;11428;11433;11474;11539;11555;11568;11640;11790;11834;11898;11906;11938;11977;12029;12036;12142;12286;12305;12333;12380;12389;12394;12416;12445;12651;12683;12724;13033;13593;13867;13983;14130;14229;14343;14652;14683;14718;14800;14842;14872;15356;15511;16002;16772;16847;16865;16913;170439;17309;17311;17855;17872;18028;18091;18260;18514;18616;19134;19223…	Epg5;Tmem98;Nt5c3;Mylk;Ints5;Manba;Aco1;Acp5;Actn3;Adora1;Adrb2;Aebp1;Akap1;Speg;Aqr;Ass1;Zfhx3;Atp2a2;Atp7a;Bcl6b;Bcat2;Prdm1;Cacna1a;Ddr1;Capn1;Cast;Cav1;Runx1;Cbx2;Ccnd3;Chkb;Cidea;Clcn2;Ctsd;Ebf3;Erbb3;Esr2;Fcgr2b;Fkbp5;Fut1;Glp1r;Gnas;Got1;Gria2;Gsx1;Gstt2;Hmgcl;Hspa1b;Igf2;Lama1;Lepr;Eif2d;Psmb8;Elovl6;Mgat3;Kitl;Mvk;Ppp1r15a;Nfib;Nkx2-5;Ocln;Pbx1;Peg3;Prpf4b;Ptgis;Wdr81;Ptprd;Ptpre;Cavin1;…	2.58% (254/9856)	9.5633e-09	8.02	100336;100502698;100502841;100503915;100900;101612;102294;104156;107045;107522;107568;107569;107607;107829;109270;110078;11302;11474;11671;11757;11758;11785;11898;11921;12028;12142;12183;12367;12388;12716;12850;12905;12972;13033;13162;13175;13199;13636;13654;13712;13885;13983;140859;14158;14297;14415;14609;14705;14731;14936;15227;15356;15368;15373;15397;16002;16363;16535;16599;16832;16865;16912;1…	Ppp1r8;Rubcn;Epg5;Smpd5;Hscb;Grwd1;Cyp4v3;Etv5;Lars;Ece2;Wwp1;Nt5c3;Nod1;Thoc5;Prr5;Pygb;Aatk;Actn3;Aldh3a2;Prdx3;Prdx6;Apbb1;Ass1;Atoh1;Bax;Prdm1;Bpgm;Casp3;Ctnnd1;Ckmt1;Coq7;Cradd;Cryz;Ctsd;Slc6a3;Dclk1;Ddn;Efna1;Egr2;Elk1;Esd;Esr2;Nek8;Fer;Fxn;Gad1;Gja1;Bscl2;Gpaa1;Gys1;Foxf1;Hmgcl;Hmox1;Hmx3;Hoxa11os;Igf2;Irf2;Kcnq1;Klf3;Ldhb;Eif2d;Psmb9;Psmb8;Lrp1;Lxn;Hdac10;Zfp369;Amacr;Melk;Mgmt;Nedd9;Nme2…
4			2.82	GO:0019438	aromatic compound biosynthetic process	The chemical reactions and pathways resulting in the formation of aromatic compounds, any substance containing an aromatic carbon ring.	2.15% (78/3622)	0.00577289	2.24	107569;11555;11568;11906;11977;12029;12142;12389;12394;12416;12445;13593;13983;14130;14652;14683;14842;15511;16002;17872;18028;18091;18514;18616;19223;19285;20319;20416;209011;211151;212712;21413;214133;216154;216853;217069;223646;224691;224829;22658;226641;231506;235047;23971;245263;245841;26901;27273;328274;330502;332110;381373;385674;387609;53314;54131;550619;57265;57314;58805;59012;66172;6712…	Nt5c3;Adrb2;Aebp1;Zfhx3;Atp7a;Bcl6b;Prdm1;Cav1;Runx1;Cbx2;Ccnd3;Ebf3;Esr2;Fcgr2b;Glp1r;Gnas;Gsx1;Hspa1b;Igf2;Ppp1r15a;Nfib;Nkx2-5;Pbx1;Peg3;Ptgis;Cavin1;Sfrp2;Shc1;Sirt7;Churc1;Satb2;Tcf4;Tet2;Med16;Wrap53;Trim25;Naprt;Zfp472;Trerf1;Pcgf2;Atf6;Lin54;Zfp809;Papss1;Gm4981;Polr2h;Ss18l2;Pdk4;Zfp459;Zfp82;Mapk15;Sp9;Zfp174;Zhx2;Batf;Irf3;Arid3c;Fzd2;Nelfcd;Mlxipl;Moxd1;Med11;Atp5e;Foxk2;Rasl11a;Rpap1…	2.73% (99/3622)	0.000380939	3.42	104156;107568;107569;107607;107829;11757;11785;11921;12142;12850;13162;13199;13636;13654;13712;13983;14158;14297;14609;15227;15368;15373;15397;16002;16363;16599;170787;170936;18103;18424;18948;19205;19698;20193;20429;20678;208647;20877;209200;210104;212712;21413;216134;216151;216154;21672;21678;216853;21937;22059;22084;22171;224619;224694;225631;225895;225998;226251;22704;227620;230674;233902;239…	Etv5;Wwp1;Nt5c3;Nod1;Thoc5;Prdx3;Apbb1;Atoh1;Prdm1;Coq7;Slc6a3;Ddn;Efna1;Egr2;Elk1;Esr2;Fer;Fxn;Gja1;Foxf1;Hmox1;Hmx3;Hoxa11os;Igf2;Irf2;Klf3;Hdac10;Zfp369;Nme2;Otx2;Pnmt;Ptbp1;Relb;S100a1;Shox2;Sox5;Creb3l2;Aurkb;Dtx3l;Zfp658;Satb2;Tcf4;Pdxk;Polrmt;Med16;Prdx2;Tead3;Wrap53;Tnfrsf1a;Trp53;Tsc2;Tyms;Traf7;Zfp81;Onecut2;Taf6l;Rorb;Ablim1;Zfp46;Uap1l1;Kdm4a;Fbxl19;Nt5e;Nfkbid;Sp8;Zfp82;Rrm2b;Primpol…
4			2.48	GO:0044249	cellular biosynthetic process	The chemical reactions and pathways resulting in the formation of substances, carried out by individual cells.	2.23% (117/5257)	0.000125799	3.9	107569;11428;11433;11555;11568;11898;11906;11977;12029;12036;12142;12286;12389;12394;12416;12445;12651;12724;13593;13983;14130;14343;14652;14683;14718;14842;15356;15511;16002;16847;16865;170439;17309;17855;17872;18028;18091;18514;18616;19223;19285;194952;19735;20319;20416;208982;209011;211151;212712;213696;21413;214133;216154;216853;217069;223646;224691;224829;225215;22658;226641;227358;228368;23…	Nt5c3;Aco1;Acp5;Adrb2;Aebp1;Ass1;Zfhx3;Atp7a;Bcl6b;Bcat2;Prdm1;Cacna1a;Cav1;Runx1;Cbx2;Ccnd3;Chkb;Clcn2;Ebf3;Esr2;Fcgr2b;Fut1;Glp1r;Gnas;Got1;Gsx1;Hmgcl;Hspa1b;Igf2;Lepr;Eif2d;Elovl6;Mgat3;Mvk;Ppp1r15a;Nfib;Nkx2-5;Pbx1;Peg3;Ptgis;Cavin1;Jmjd4;Rgs2;Sfrp2;Shc1;Hmgcll1;Sirt7;Churc1;Satb2;Duoxa1;Tcf4;Tet2;Med16;Wrap53;Trim25;Naprt;Zfp472;Trerf1;Rsl24d1;Pcgf2;Atf6;Erfe;Slc35c1;Lin54;Mpv17l2;Zfp809;Pap…	2.59% (136/5257)	0.000258787	3.59	100503915;100900;101612;104156;107045;107568;107569;107607;107829;11757;11785;11898;11921;12142;12850;13162;13199;13636;13654;13712;13983;14158;14297;14415;14609;14705;14731;14936;15227;15356;15368;15373;15397;16002;16363;16599;16832;16865;170787;170936;17117;18103;18424;18948;19205;19698;19935;19944;20193;20429;20678;208647;20877;209200;210104;212712;21413;216134;216151;216154;21672;21678;216853…	Smpd5;Hscb;Grwd1;Etv5;Lars;Wwp1;Nt5c3;Nod1;Thoc5;Prdx3;Apbb1;Ass1;Atoh1;Prdm1;Coq7;Slc6a3;Ddn;Efna1;Egr2;Elk1;Esr2;Fer;Fxn;Gad1;Gja1;Bscl2;Gpaa1;Gys1;Foxf1;Hmgcl;Hmox1;Hmx3;Hoxa11os;Igf2;Irf2;Klf3;Ldhb;Eif2d;Hdac10;Zfp369;Amacr;Nme2;Otx2;Pnmt;Ptbp1;Relb;Mrpl23;Rpl29;S100a1;Shox2;Sox5;Creb3l2;Aurkb;Dtx3l;Zfp658;Satb2;Tcf4;Pdxk;Polrmt;Med16;Prdx2;Tead3;Wrap53;B4galt7;Tnfrsf1a;Trp53;Tsc2;Tyms;Eif2b5…
4			2.34	GO:0046483	heterocycle metabolic process	The chemical reactions and pathways involving heterocyclic compounds, those with a cyclic molecular structure and at least two different atoms in the ring (or rings).	2.02% (104/5140)	0.00873825	2.06	107569;109077;11474;11555;11568;11834;11906;11977;12029;12142;12389;12394;12416;12445;12683;13593;13983;14130;14652;14683;14842;15356;15511;16002;17855;17872;18028;18091;18514;18616;19134;19223;19285;20319;20416;209011;211151;212712;21413;214133;216154;216188;216853;217069;223646;224691;224829;22658;226641;229512;231506;235047;23971;245263;245841;26901;27273;328274;330502;332110;381373;382913;384…	Nt5c3;Ints5;Actn3;Adrb2;Aebp1;Aqr;Zfhx3;Atp7a;Bcl6b;Prdm1;Cav1;Runx1;Cbx2;Ccnd3;Cidea;Ebf3;Esr2;Fcgr2b;Glp1r;Gnas;Gsx1;Hmgcl;Hspa1b;Igf2;Mvk;Ppp1r15a;Nfib;Nkx2-5;Pbx1;Peg3;Prpf4b;Ptgis;Cavin1;Sfrp2;Shc1;Sirt7;Churc1;Satb2;Tcf4;Tet2;Med16;Aldh1l2;Wrap53;Trim25;Naprt;Zfp472;Trerf1;Pcgf2;Atf6;Smg5;Lin54;Zfp809;Papss1;Gm4981;Polr2h;Ss18l2;Pdk4;Zfp459;Zfp82;Mapk15;Sp9;Neil2;Kash5;Zfp174;Zhx2;Angel2;Ac…	2.68% (138/5140)	3.79323e-05	4.42	100336;104156;107045;107568;107569;107607;107829;11474;11757;11758;11785;11921;12028;12142;12183;12367;12850;13199;13636;13654;13712;13983;14158;14297;14609;15227;15356;15368;15373;15397;16002;16363;16535;16599;170787;170936;17314;18103;18207;18424;19125;19205;19698;20193;20429;20678;208647;20877;209200;209584;210104;212712;21413;216134;216151;216154;21672;21678;216853;21937;22059;22084;22171;224…	Ppp1r8;Etv5;Lars;Wwp1;Nt5c3;Nod1;Thoc5;Actn3;Prdx3;Prdx6;Apbb1;Atoh1;Bax;Prdm1;Bpgm;Casp3;Coq7;Ddn;Efna1;Egr2;Elk1;Esr2;Fer;Fxn;Gja1;Foxf1;Hmgcl;Hmox1;Hmx3;Hoxa11os;Igf2;Irf2;Kcnq1;Klf3;Hdac10;Zfp369;Mgmt;Nme2;Nthl1;Otx2;Prodh;Ptbp1;Relb;S100a1;Shox2;Sox5;Creb3l2;Aurkb;Dtx3l;Tyw3;Zfp658;Satb2;Tcf4;Pdxk;Polrmt;Med16;Prdx2;Tead3;Wrap53;Tnfrsf1a;Trp53;Tsc2;Tyms;Traf7;Zfp81;Onecut2;Taf6l;Rorb;Ablim1;…
4			2.83	GO:0018130	heterocycle biosynthetic process	The chemical reactions and pathways resulting in the formation of heterocyclic compounds, those with a cyclic molecular structure and at least two different atoms in the ring (or rings).	2.11% (76/3607)	0.0108714	1.96	NA	NA	2.69% (97/3607)	0.000771978	3.11	104156;107568;107569;107607;107829;11757;11785;11921;12142;12850;13199;13636;13654;13712;13983;14158;14297;14609;15227;15368;15373;15397;16002;16363;16599;170787;170936;18103;18424;19205;19698;20193;20429;20678;208647;20877;209200;210104;212712;21413;216134;216151;216154;21672;21678;216853;21937;22059;22084;22171;224619;224694;225631;225895;225998;226251;22704;227620;230674;233902;23959;243910;32…	Etv5;Wwp1;Nt5c3;Nod1;Thoc5;Prdx3;Apbb1;Atoh1;Prdm1;Coq7;Ddn;Efna1;Egr2;Elk1;Esr2;Fer;Fxn;Gja1;Foxf1;Hmox1;Hmx3;Hoxa11os;Igf2;Irf2;Klf3;Hdac10;Zfp369;Nme2;Otx2;Ptbp1;Relb;S100a1;Shox2;Sox5;Creb3l2;Aurkb;Dtx3l;Zfp658;Satb2;Tcf4;Pdxk;Polrmt;Med16;Prdx2;Tead3;Wrap53;Tnfrsf1a;Trp53;Tsc2;Tyms;Traf7;Zfp81;Onecut2;Taf6l;Rorb;Ablim1;Zfp46;Uap1l1;Kdm4a;Fbxl19;Nt5e;Nfkbid;Sp8;Zfp82;Rrm2b;Primpol;Slc25a13;Ch…
5		Metabolic process	6.07	GO:0046034	ATP metabolic process	The chemical reactions and pathways involving ATP, adenosine triphosphate, a universally important coenzyme and enzyme regulator.	3.07% (8/261)	0.0662029	1.18	NA	NA	4.98% (13/261)	0.00220206	2.66	11474;12183;12850;14297;22059;225887;23959;50799;66437;67892;67942;72106;78330	Actn3;Bpgm;Coq7;Fxn;Trp53;Ndufs8;Nt5e;Slc25a13;Fis1;Coa6;Atp5g2;Jmjd8;Ndufv3
5			5.48	GO:0055114	oxidation-reduction process	A metabolic process that results in the removal or addition of one or more electrons to or from a substance, with or without the concomitant removal or addition of a proton or protons.	3.73% (17/456)	0.00149387	2.83	11428;11474;14683;16002;16847;21351;214133;216188;224530;226646;239017;242700;27273;333433;52538;56421;68837	Aco1;Actn3;Gnas;Igf2;Lepr;Taldo1;Tet2;Aldh1l2;Acat3;Ndufs2;Ogdhl;Ifnlr1;Pdk4;Gpd1l;Acaa2;Pfkp;Foxk2	4.17% (19/456)	0.00198126	2.7	102294;110078;11474;11757;12028;12850;14297;14936;15368;16002;22059;225887;50493;50799;53322;67892;71701;78330;78830	Cyp4v3;Pygb;Actn3;Prdx3;Bax;Coq7;Fxn;Gys1;Hmox1;Igf2;Trp53;Ndufs8;Txnrd1;Slc25a13;Nucb2;Coa6;Pnpt1;Ndufv3;Slc25a12
5			1.55	GO:0044238	primary metabolic process	The chemical reactions and pathways involving those compounds which are formed as a part of the normal anabolic and catabolic processes. These processes take place in most, if not all, cells of the organism.	2.1% (203/9679)	1.72135e-06	5.76	103743;107569;107589;109077;110173;11428;11474;11539;11555;11568;11640;11834;11898;11906;11977;12029;12036;12142;12286;12305;12333;12369;12380;12389;12394;12416;12445;12642;12651;12683;12724;13033;13593;13867;13983;14130;14229;14343;14652;14683;14718;14842;15356;15511;16002;16716;16772;16847;16865;16913;170439;17309;17311;17389;17855;17872;18028;18091;18260;18514;18616;19134;19223;192652;19266;19…	Tmem98;Nt5c3;Mylk;Ints5;Manba;Aco1;Actn3;Adora1;Adrb2;Aebp1;Akap1;Aqr;Ass1;Zfhx3;Atp7a;Bcl6b;Bcat2;Prdm1;Cacna1a;Ddr1;Capn1;Casp7;Cast;Cav1;Runx1;Cbx2;Ccnd3;Ch25h;Chkb;Cidea;Clcn2;Ctsd;Ebf3;Erbb3;Esr2;Fcgr2b;Fkbp5;Fut1;Glp1r;Gnas;Got1;Gsx1;Hmgcl;Hspa1b;Igf2;Ky;Lama1;Lepr;Eif2d;Psmb8;Elovl6;Mgat3;Kitl;Mmp16;Mvk;Ppp1r15a;Nfib;Nkx2-5;Ocln;Pbx1;Peg3;Prpf4b;Ptgis;Wdr81;Ptprd;Ptpre;Cavin1;Jmjd4;Rgs2;Sf…	2.48% (240/9679)	1.9242e-06	5.72	100336;100502698;100503915;100900;102294;104156;107045;107522;107568;107569;107607;107829;109270;110078;11302;11474;11671;11757;11758;11785;11898;11921;12028;12142;12183;12367;12388;12642;12850;12905;13033;13162;13175;13199;13636;13654;13712;13983;14158;14297;14415;14609;14705;14731;14936;15227;15356;15368;15373;15397;16002;16363;16535;16599;16832;16865;16912;16913;16971;17035;170787;170936;17117…	Ppp1r8;Rubcn;Smpd5;Hscb;Cyp4v3;Etv5;Lars;Ece2;Wwp1;Nt5c3;Nod1;Thoc5;Prr5;Pygb;Aatk;Actn3;Aldh3a2;Prdx3;Prdx6;Apbb1;Ass1;Atoh1;Bax;Prdm1;Bpgm;Casp3;Ctnnd1;Ch25h;Coq7;Cradd;Ctsd;Slc6a3;Dclk1;Ddn;Efna1;Egr2;Elk1;Esr2;Fer;Fxn;Gad1;Gja1;Bscl2;Gpaa1;Gys1;Foxf1;Hmgcl;Hmox1;Hmx3;Hoxa11os;Igf2;Irf2;Kcnq1;Klf3;Ldhb;Eif2d;Psmb9;Psmb8;Lrp1;Lxn;Hdac10;Zfp369;Amacr;Melk;Mgmt;Nedd9;Nme2;Nrxn1;Nthl1;Otx2;Prodh;P…
5			8.64	GO:0019674	NAD metabolic process	The chemical reactions and pathways involving nicotinamide adenine dinucleotide (NAD), a coenzyme present in most living cells and derived from the B vitamin nicotinic acid.	16% (4/25)	0.00068005	3.17	11474;333433;56421;68837	Actn3;Gpd1l;Pfkp;Foxk2	12% (3/25)	0.0127829	1.89	NA	NA
5			1.66	GO:0006807	nitrogen compound metabolic process	The chemical reactions and pathways involving organic or inorganic compounds that contain nitrogen.	2.15% (196/9120)	5.03413e-07	6.3	103743;107569;107589;109077;110173;11428;11433;11474;11539;11555;11568;11640;11834;11898;11906;11977;12029;12036;12142;12286;12305;12333;12369;12380;12389;12394;12416;12445;12651;12683;13033;13593;13867;13983;14130;14229;14343;14652;14683;14718;14842;14872;15356;15511;16002;16716;16772;16847;16865;16913;170439;17309;17311;17389;17855;17872;18028;18091;18260;18514;18616;19134;19223;192652;19266;19…	Tmem98;Nt5c3;Mylk;Ints5;Manba;Aco1;Acp5;Actn3;Adora1;Adrb2;Aebp1;Akap1;Aqr;Ass1;Zfhx3;Atp7a;Bcl6b;Bcat2;Prdm1;Cacna1a;Ddr1;Capn1;Casp7;Cast;Cav1;Runx1;Cbx2;Ccnd3;Chkb;Cidea;Ctsd;Ebf3;Erbb3;Esr2;Fcgr2b;Fkbp5;Fut1;Glp1r;Gnas;Got1;Gsx1;Gstt2;Hmgcl;Hspa1b;Igf2;Ky;Lama1;Lepr;Eif2d;Psmb8;Elovl6;Mgat3;Kitl;Mmp16;Mvk;Ppp1r15a;Nfib;Nkx2-5;Ocln;Pbx1;Peg3;Prpf4b;Ptgis;Wdr81;Ptprd;Ptpre;Cavin1;Jmjd4;Rgs2;Sfr…	2.52% (230/9120)	1.04803e-06	5.98	100336;100503915;100900;104156;107045;107522;107568;107569;107607;107829;109270;11302;11474;11757;11758;11785;11898;11921;12028;12142;12183;12367;12388;12716;12850;12905;13033;13162;13175;13199;13636;13654;13712;13983;14158;14297;14415;14609;14731;15227;15356;15368;15373;15397;16002;16363;16535;16599;16865;16912;16913;16971;17035;170787;170936;17279;17314;18003;18103;18189;18207;18424;18948;19125…	Ppp1r8;Smpd5;Hscb;Etv5;Lars;Ece2;Wwp1;Nt5c3;Nod1;Thoc5;Prr5;Aatk;Actn3;Prdx3;Prdx6;Apbb1;Ass1;Atoh1;Bax;Prdm1;Bpgm;Casp3;Ctnnd1;Ckmt1;Coq7;Cradd;Ctsd;Slc6a3;Dclk1;Ddn;Efna1;Egr2;Elk1;Esr2;Fer;Fxn;Gad1;Gja1;Gpaa1;Foxf1;Hmgcl;Hmox1;Hmx3;Hoxa11os;Igf2;Irf2;Kcnq1;Klf3;Eif2d;Psmb9;Psmb8;Lrp1;Lxn;Hdac10;Zfp369;Melk;Mgmt;Nedd9;Nme2;Nrxn1;Nthl1;Otx2;Pnmt;Prodh;Psap;Psme1;Ptbp1;Ptpn18;Relb;Mrpl23;Rpl29;S1…
5			8.47	GO:0006734	NADH metabolic process	The chemical reactions and pathways involving reduced nicotinamide adenine dinucleotide (NADH), a coenzyme present in most living cells and derived from the B vitamin nicotinic acid.	12.5% (4/32)	0.00176661	2.75	11474;333433;56421;68837	Actn3;Gpd1l;Pfkp;Foxk2	6.25% (2/32)	0.131423	0.88	NA	NA
5			1.3	GO:0008152	metabolic process	The chemical reactions and pathways, including anabolism and catabolism, by which living organisms transform chemical substances. Metabolic processes typically transform small molecules, but also include macromolecular processes such as DNA repair and replication, and protein synthesis and degradation.	2.07% (226/10915)	4.14101e-07	6.38	100502841;103743;107569;107589;109077;110173;11428;11433;11474;11539;11555;11568;11640;11790;11834;11898;11906;11938;11977;12029;12036;12142;12286;12305;12333;12369;12380;12389;12394;12416;12445;12642;12651;12683;12724;13033;13593;13867;13983;14130;14229;14343;14652;14683;14718;14800;14842;14872;15356;15511;16002;16716;16772;16847;16865;16913;170439;17309;17311;17389;17855;17872;18028;18091;18260…	Epg5;Tmem98;Nt5c3;Mylk;Ints5;Manba;Aco1;Acp5;Actn3;Adora1;Adrb2;Aebp1;Akap1;Speg;Aqr;Ass1;Zfhx3;Atp2a2;Atp7a;Bcl6b;Bcat2;Prdm1;Cacna1a;Ddr1;Capn1;Casp7;Cast;Cav1;Runx1;Cbx2;Ccnd3;Ch25h;Chkb;Cidea;Clcn2;Ctsd;Ebf3;Erbb3;Esr2;Fcgr2b;Fkbp5;Fut1;Glp1r;Gnas;Got1;Gria2;Gsx1;Gstt2;Hmgcl;Hspa1b;Igf2;Ky;Lama1;Lepr;Eif2d;Psmb8;Elovl6;Mgat3;Kitl;Mmp16;Mvk;Ppp1r15a;Nfib;Nkx2-5;Ocln;Pbx1;Peg3;Prpf4b;Ptgis;Wdr8…	2.47% (270/10915)	1.34426e-07	6.87	100336;100502698;100502841;100503915;100900;101612;102294;104156;106869;107045;107522;107568;107569;107607;107829;109270;110078;11302;11474;11671;11757;11758;11785;11898;11921;12028;12142;12183;12367;12388;12642;12716;12850;12905;12972;13033;13162;13175;13199;13636;13654;13712;13885;13983;140859;14158;14297;14415;14609;14705;14731;14936;15227;15356;15368;15373;15397;16002;16363;16535;16599;16832;…	Ppp1r8;Rubcn;Epg5;Smpd5;Hscb;Grwd1;Cyp4v3;Etv5;Tnfaip8;Lars;Ece2;Wwp1;Nt5c3;Nod1;Thoc5;Prr5;Pygb;Aatk;Actn3;Aldh3a2;Prdx3;Prdx6;Apbb1;Ass1;Atoh1;Bax;Prdm1;Bpgm;Casp3;Ctnnd1;Ch25h;Ckmt1;Coq7;Cradd;Cryz;Ctsd;Slc6a3;Dclk1;Ddn;Efna1;Egr2;Elk1;Esd;Esr2;Nek8;Fer;Fxn;Gad1;Gja1;Bscl2;Gpaa1;Gys1;Foxf1;Hmgcl;Hmox1;Hmx3;Hoxa11os;Igf2;Irf2;Kcnq1;Klf3;Ldhb;Eif2d;Psmb9;Psmb8;Lrp1;Lxn;Hdac10;Zfp369;Amacr;Melk;M…
5			2.44	GO:0009058	biosynthetic process	The chemical reactions and pathways resulting in the formation of substances; typically the energy-requiring part of metabolism in which simpler substances are transformed into more complex ones.	2.21% (120/5430)	0.000133536	3.87	107569;11428;11433;11555;11568;11898;11906;11977;12029;12036;12142;12286;12389;12394;12416;12445;12642;12651;12724;13593;13983;14130;14343;14652;14683;14718;14842;15356;15511;16002;16847;16865;170439;17309;17855;17872;18028;18091;18514;18616;19223;19285;194952;19735;20319;20416;208982;209011;211151;212712;213696;21413;214133;216154;216188;216853;217069;223646;224691;224829;225215;22658;226641;227…	Nt5c3;Aco1;Acp5;Adrb2;Aebp1;Ass1;Zfhx3;Atp7a;Bcl6b;Bcat2;Prdm1;Cacna1a;Cav1;Runx1;Cbx2;Ccnd3;Ch25h;Chkb;Clcn2;Ebf3;Esr2;Fcgr2b;Fut1;Glp1r;Gnas;Got1;Gsx1;Hmgcl;Hspa1b;Igf2;Lepr;Eif2d;Elovl6;Mgat3;Mvk;Ppp1r15a;Nfib;Nkx2-5;Pbx1;Peg3;Ptgis;Cavin1;Jmjd4;Rgs2;Sfrp2;Shc1;Hmgcll1;Sirt7;Churc1;Satb2;Duoxa1;Tcf4;Tet2;Med16;Aldh1l2;Wrap53;Trim25;Naprt;Zfp472;Trerf1;Rsl24d1;Pcgf2;Atf6;Erfe;Slc35c1;Lin54;Mpv1…	2.62% (142/5430)	0.000103487	3.99	100503915;100900;101612;104156;107045;107568;107569;107607;107829;11757;11785;11898;11921;12142;12642;12716;12850;13162;13199;13636;13654;13712;13983;14158;14297;14415;14609;14705;14731;14936;15227;15356;15368;15373;15397;16002;16363;16599;16832;16865;170787;170936;17117;18103;18424;18948;19205;19698;19935;19944;20193;20429;20528;20678;208647;20877;209200;210104;212712;21413;216134;216151;216154;…	Smpd5;Hscb;Grwd1;Etv5;Lars;Wwp1;Nt5c3;Nod1;Thoc5;Prdx3;Apbb1;Ass1;Atoh1;Prdm1;Ch25h;Ckmt1;Coq7;Slc6a3;Ddn;Efna1;Egr2;Elk1;Esr2;Fer;Fxn;Gad1;Gja1;Bscl2;Gpaa1;Gys1;Foxf1;Hmgcl;Hmox1;Hmx3;Hoxa11os;Igf2;Irf2;Klf3;Ldhb;Eif2d;Hdac10;Zfp369;Amacr;Nme2;Otx2;Pnmt;Ptbp1;Relb;Mrpl23;Rpl29;S100a1;Shox2;Slc2a4;Sox5;Creb3l2;Aurkb;Dtx3l;Zfp658;Satb2;Tcf4;Pdxk;Polrmt;Med16;Prdx2;Tead3;Wrap53;B4galt7;Tnfrsf1a;Trp…
5			4.94	GO:0044283	small molecule biosynthetic process	The chemical reactions and pathways resulting in the formation of small molecules, any low molecular weight, monomeric, non-encoded molecule.	2.98% (19/637)	0.009162	2.04	107569;11898;12036;12445;12724;14718;15356;16847;170439;17855;19223;208982;209011;227358;268860;27273;58805;59012;76267	Nt5c3;Ass1;Bcat2;Ccnd3;Clcn2;Got1;Hmgcl;Lepr;Elovl6;Mvk;Ptgis;Hmgcll1;Sirt7;Erfe;Abat;Pdk4;Mlxipl;Moxd1;Fads1	2.67% (17/637)	0.131328	0.88	NA	NA
5			3.55	GO:0044281	small molecule metabolic process	The chemical reactions and pathways involving small molecules, any low molecular weight, monomeric, non-encoded molecule.	2.66% (47/1770)	0.000697202	3.16	107569;11428;11474;11898;11977;12036;12286;12389;12445;12642;12724;14718;15356;16002;16847;170439;17855;19223;208982;209011;214133;216188;223646;224530;227358;234515;23827;239017;23971;26569;268860;27273;394436;52538;54122;56421;58805;59012;65970;67111;67126;68837;68977;71941;76267;76459;77697	Nt5c3;Aco1;Actn3;Ass1;Atp7a;Bcat2;Cacna1a;Cav1;Ccnd3;Ch25h;Clcn2;Got1;Hmgcl;Igf2;Lepr;Elovl6;Mvk;Ptgis;Hmgcll1;Sirt7;Tet2;Aldh1l2;Naprt;Acat3;Erfe;Inpp4b;Bpnt1;Ogdhl;Papss1;Slc27a4;Abat;Pdk4;Ugt1a1;Acaa2;Uevld;Pfkp;Mlxipl;Moxd1;Lima1;Naaa;Atp5e;Foxk2;Haghl;Cars2;Fads1;Car12;Mmab	3.16% (56/1770)	0.000324349	3.49	102294;107045;107569;11474;11671;11898;12183;12642;12850;13885;14415;15356;16002;16535;16832;16971;17117;18103;19125;209378;216134;21937;22059;22171;227620;229487;229905;232339;23959;268860;26889;382985;50493;50799;50880;53322;54122;54369;54447;56520;57742;66422;67111;67247;67942;68556;68631;68738;68971;69634;71797;71941;72106;73724;73744;80982	Cyp4v3;Lars;Nt5c3;Actn3;Aldh3a2;Ass1;Bpgm;Ch25h;Coq7;Esd;Gad1;Hmgcl;Igf2;Kcnq1;Ldhb;Lrp1;Amacr;Nme2;Prodh;Itih5;Pdxk;Tnfrsf1a;Trp53;Tyms;Uap1l1;Gatb;Kyat3;Ankrd26;Nt5e;Abat;Cln8;Rrm2b;Txnrd1;Slc25a13;Scly;Nucb2;Uevld;Nme6;Asah2;Nme4;Abhd1;Dctpp1;Naaa;Mtarc2;Atp5g2;Uckl1;Cryl1;Acss1;Tamm41;Clybl;Chst13;Cars2;Jmjd8;Mcee;Man2c1;Cemip
5			3.53	GO:0009056	catabolic process	The chemical reactions and pathways resulting in the breakdown of substances, including the breakdown of carbon compounds with the liberation of energy for use by the cell or organism.	2.59% (62/2394)	0.000179319	3.75	100502841;107569;110173;11474;11539;11555;11938;12036;12333;12380;12389;12683;13033;14718;15356;15511;16847;16913;17309;17389;192652;208982;213990;214133;216188;216725;217069;217893;224530;226641;227738;229512;234515;23827;260302;26561;26569;268860;332110;333433;387609;394436;433022;50760;52477;52538;56421;56698;57296;57775;58805;59012;66795;67111;68837;68977;69241;74245;74735;74769;76932;80708	Epg5;Nt5c3;Manba;Actn3;Adora1;Adrb2;Atp2a2;Bcat2;Capn1;Cast;Cav1;Cidea;Ctsd;Got1;Hmgcl;Hspa1b;Lepr;Psmb8;Mgat3;Mmp16;Wdr81;Hmgcll1;Agap3;Tet2;Aldh1l2;Adamts2;Trim25;Pacs2;Acat3;Atf6;Lrsam1;Smg5;Inpp4b;Bpnt1;Gga3;Mmp23;Slc27a4;Abat;Mapk15;Gpd1l;Zhx2;Ugt1a1;Plcxd2;Fbxo17;Angel2;Acaa2;Pfkp;Phax;Psmd8;Usp29;Mlxipl;Moxd1;Atg10;Naaa;Foxk2;Haghl;Polr2d;Ctbs;Trim14;Pik3cb;Arfip2;Pacsin3	3.09% (74/2394)	6.74148e-05	4.17	100502698;100502841;100503915;107568;107569;107607;110078;11474;11757;11758;12028;12183;12367;12972;13033;13162;13636;13885;14609;14705;15356;15368;16912;16913;16971;170787;17117;18624;19125;19156;19186;209200;21672;22059;22084;230674;233902;237886;23959;26446;268860;26889;268933;269338;27403;50493;50880;50883;54447;545622;56404;57742;64138;64295;66373;66422;66437;67111;67391;67710;68917;69305;69…	Rubcn;Epg5;Smpd5;Wwp1;Nt5c3;Nod1;Pygb;Actn3;Prdx3;Prdx6;Bax;Bpgm;Casp3;Cryz;Ctsd;Slc6a3;Efna1;Esd;Gja1;Bscl2;Hmgcl;Hmox1;Psmb9;Psmb8;Lrp1;Hdac10;Amacr;Pepd;Prodh;Psap;Psme1;Dtx3l;Prdx2;Trp53;Tsc2;Kdm4a;Fbxl19;Slfn9;Nt5e;Psmb3;Abat;Cln8;Wdr24;Vps39;Abca7;Txnrd1;Scly;Chek2;Asah2;Ptpn3;Trip4;Abhd1;Ctsz;Tmub1;Lsm5;Dctpp1;Fis1;Naaa;Fundc2;Polr2g;Hint2;Dcps;Cdc16;Pnpt1;Dhx34;Vps11;Jmjd8;Man2c1;Ctbs;Ses…
5			5.57	GO:0044282	small molecule catabolic process	The chemical reactions and pathways resulting in the breakdown of small molecules, any low molecular weight, monomeric, non-encoded molecule.	4.25% (15/353)	0.000772945	3.11	11474;12036;14718;15356;208982;216188;224530;234515;23827;26569;268860;52538;56421;68837;68977	Actn3;Bcat2;Got1;Hmgcl;Hmgcll1;Aldh1l2;Acat3;Inpp4b;Bpnt1;Slc27a4;Abat;Acaa2;Pfkp;Foxk2;Haghl	2.55% (9/353)	0.265777	0.58	NA	NA
5			6.85	GO:0072527	pyrimidine-containing compound metabolic process	The chemical reactions and pathways involving a pyrimidine-containing compound, i.e. any compound that contains pyrimidine or a formal derivative thereof.	3.23% (2/62)	0.269662	0.57	NA	NA	11.29% (7/62)	0.000216922	3.66	107569;18103;22171;54369;56520;66422;68971	Nt5c3;Nme2;Tyms;Nme6;Nme4;Dctpp1;Tamm41
5			7.65	GO:0072528	pyrimidine-containing compound biosynthetic process	The chemical reactions and pathways resulting in the formation of a pyrimidine-containing compound, i.e. any compound that contains pyrimidine or a formal derivative thereof.	0% (0/31)	1	0	NA	NA	16.13% (5/31)	0.000328346	3.48	18103;22171;54369;56520;68971	Nme2;Tyms;Nme6;Nme4;Tamm41
5			9	GO:0042415	norepinephrine metabolic process	The chemical reactions and pathways involving norepinephrine, a hormone secreted by the adrenal medulla, and a neurotransmitter in the sympathetic peripheral nervous system and in some tracts in the central nervous system. It is also the demethylated biosynthetic precursor of epinephrine.	16.67% (3/18)	0.00295543	2.53	11977;59012;619287	Atp7a;Moxd1;Rtl4	5.56% (1/18)	0.302029	0.52	NA	NA
5			2.29	GO:1901564	organonitrogen compound metabolic process	NA	2.1% (131/6251)	0.000612053	3.21	103743;107569;107589;110173;11428;11474;11539;11555;11568;11640;11898;11977;12036;12286;12305;12333;12369;12380;12389;12445;12651;13033;13867;13983;14130;14229;14343;14683;14718;14872;15356;15511;16002;16716;16772;16847;16865;16913;170439;17309;17311;17389;17855;17872;18260;19134;192652;19266;19267;194952;19735;20319;20320;20416;208982;209011;20971;213696;213990;214133;216188;216725;217011;217069…	Tmem98;Nt5c3;Mylk;Manba;Aco1;Actn3;Adora1;Adrb2;Aebp1;Akap1;Ass1;Atp7a;Bcat2;Cacna1a;Ddr1;Capn1;Casp7;Cast;Cav1;Ccnd3;Chkb;Ctsd;Erbb3;Esr2;Fcgr2b;Fkbp5;Fut1;Gnas;Got1;Gstt2;Hmgcl;Hspa1b;Igf2;Ky;Lama1;Lepr;Eif2d;Psmb8;Elovl6;Mgat3;Kitl;Mmp16;Mvk;Ppp1r15a;Ocln;Prpf4b;Wdr81;Ptprd;Ptpre;Jmjd4;Rgs2;Sfrp2;Nptn;Shc1;Hmgcll1;Sirt7;Sdc4;Duoxa1;Agap3;Tet2;Aldh1l2;Adamts2;Nle1;Trim25;Trpc5;Naprt;Ttll12;Trer…	2.5% (156/6251)	0.000421482	3.38	100336;100503915;100900;107045;107522;107568;107569;107607;109270;11302;11474;11757;11785;11898;12028;12183;12367;12388;12716;12905;13033;13162;13175;13636;13654;13983;14158;14297;14415;14609;14731;15356;15368;16002;16865;16912;16913;16971;17035;170787;170936;17279;17314;18003;18103;18189;18948;19125;19156;19186;19205;19253;19935;19944;20714;20877;209200;209378;210622;216134;21672;218271;21937;22…	Ppp1r8;Smpd5;Hscb;Lars;Ece2;Wwp1;Nt5c3;Nod1;Prr5;Aatk;Actn3;Prdx3;Apbb1;Ass1;Bax;Bpgm;Casp3;Ctnnd1;Ckmt1;Cradd;Ctsd;Slc6a3;Dclk1;Efna1;Egr2;Esr2;Fer;Fxn;Gad1;Gja1;Gpaa1;Hmgcl;Hmox1;Igf2;Eif2d;Psmb9;Psmb8;Lrp1;Lxn;Hdac10;Zfp369;Melk;Mgmt;Nedd9;Nme2;Nrxn1;Pnmt;Prodh;Psap;Psme1;Ptbp1;Ptpn18;Mrpl23;Rpl29;Serpina3k;Aurkb;Dtx3l;Itih5;Pamr1;Pdxk;Prdx2;B4galt7;Tnfrsf1a;Trp53;Tsc2;Tyms;Eif2b5;Traf7;Taf6l;…
5			3.99	GO:1901566	organonitrogen compound biosynthetic process	NA	2.28% (35/1533)	0.0291994	1.53	NA	NA	2.87% (44/1533)	0.00840808	2.08	100503915;107045;11898;12716;13162;14297;14415;14731;16865;18103;18948;19935;19944;216134;218271;22171;224045;228812;229487;231279;23959;268860;269181;27367;27403;50799;54369;54447;56404;56520;64657;66223;66268;66292;66419;66971;67292;67710;67942;68738;68971;71797;71941;78796	Smpd5;Lars;Ass1;Ckmt1;Slc6a3;Fxn;Gad1;Gpaa1;Eif2d;Nme2;Pnmt;Mrpl23;Rpl29;Pdxk;B4galt7;Tyms;Eif2b5;Pigu;Gatb;Guf1;Nt5e;Abat;Mgat4a;Rpl3;Abca7;Slc25a13;Nme6;Asah2;Trip4;Nme4;Mrps10;Mrpl35;Pigyl;Mrps21;Mrpl11;Cdk5rap1;Pigc;Polr2g;Atp5g2;Acss1;Tamm41;Chst13;Cars2;Zcchc4
5			2.69	GO:0034645	cellular macromolecule biosynthetic process	The chemical reactions and pathways resulting in the formation of a macromolecule, any molecule of high relative molecular mass, the structure of which essentially comprises the multiple repetition of units derived, actually or conceptually, from molecules of low relative molecular mass, carried out by individual cells.	2.18% (94/4319)	0.00159917	2.8	11428;11555;11568;11906;11977;12029;12142;12389;12394;12416;12445;13593;13983;14130;14343;14652;14683;14842;15511;16002;16865;17309;17855;17872;18028;18091;18514;18616;19223;19285;194952;19735;20319;20416;209011;211151;212712;21413;214133;216154;216853;217069;224691;224829;225215;22658;226641;228368;231506;234384;235047;241230;245263;245841;26901;269261;328274;330502;332110;381373;385674;387609;5…	Aco1;Adrb2;Aebp1;Zfhx3;Atp7a;Bcl6b;Prdm1;Cav1;Runx1;Cbx2;Ccnd3;Ebf3;Esr2;Fcgr2b;Fut1;Glp1r;Gnas;Gsx1;Hspa1b;Igf2;Eif2d;Mgat3;Mvk;Ppp1r15a;Nfib;Nkx2-5;Pbx1;Peg3;Ptgis;Cavin1;Jmjd4;Rgs2;Sfrp2;Shc1;Sirt7;Churc1;Satb2;Tcf4;Tet2;Med16;Wrap53;Trim25;Zfp472;Trerf1;Rsl24d1;Pcgf2;Atf6;Slc35c1;Lin54;Mpv17l2;Zfp809;St8sia6;Gm4981;Polr2h;Ss18l2;Rpl12;Zfp459;Zfp82;Mapk15;Sp9;Zfp174;Zhx2;Batf;Irf3;Arid3c;Fzd2;…	2.52% (109/4319)	0.0031152	2.51	101612;104156;107045;107568;107607;107829;11757;11785;11921;12142;12850;13199;13636;13654;13712;13983;14158;14609;14731;14936;15227;15368;15373;15397;16002;16363;16599;16865;170787;170936;18424;19205;19698;19935;19944;20193;20429;20678;208647;20877;209200;210104;212712;21413;216151;216154;21672;21678;216853;218271;21937;22059;22084;22171;224045;224619;224694;225631;225895;225998;226251;22704;2288…	Grwd1;Etv5;Lars;Wwp1;Nod1;Thoc5;Prdx3;Apbb1;Atoh1;Prdm1;Coq7;Ddn;Efna1;Egr2;Elk1;Esr2;Fer;Gja1;Gpaa1;Gys1;Foxf1;Hmox1;Hmx3;Hoxa11os;Igf2;Irf2;Klf3;Eif2d;Hdac10;Zfp369;Otx2;Ptbp1;Relb;Mrpl23;Rpl29;S100a1;Shox2;Sox5;Creb3l2;Aurkb;Dtx3l;Zfp658;Satb2;Tcf4;Polrmt;Med16;Prdx2;Tead3;Wrap53;B4galt7;Tnfrsf1a;Trp53;Tsc2;Tyms;Eif2b5;Traf7;Zfp81;Onecut2;Taf6l;Rorb;Ablim1;Zfp46;Pigu;Gatb;Kdm4a;Guf1;Fbxl19;Nfk…
5			2.9	GO:2000112	regulation of cellular macromolecule biosynthetic process	NA	2.13% (75/3528)	0.00930658	2.03	11428;11555;11568;11906;12029;12142;12389;12394;12416;12445;13593;13983;14130;14652;14683;14842;15511;16002;17855;17872;18028;18091;18514;18616;19223;194952;19735;20319;20416;209011;211151;212712;21413;214133;216154;216853;217069;224691;224829;22658;226641;231506;234384;235047;245263;26901;328274;330502;332110;381373;385674;387609;53314;54131;550619;57265;57314;58805;622408;66172;68837;68895;6899…	Aco1;Adrb2;Aebp1;Zfhx3;Bcl6b;Prdm1;Cav1;Runx1;Cbx2;Ccnd3;Ebf3;Esr2;Fcgr2b;Glp1r;Gnas;Gsx1;Hspa1b;Igf2;Mvk;Ppp1r15a;Nfib;Nkx2-5;Pbx1;Peg3;Ptgis;Jmjd4;Rgs2;Sfrp2;Shc1;Sirt7;Churc1;Satb2;Tcf4;Tet2;Med16;Wrap53;Trim25;Zfp472;Trerf1;Pcgf2;Atf6;Lin54;Mpv17l2;Zfp809;Gm4981;Ss18l2;Zfp459;Zfp82;Mapk15;Sp9;Zfp174;Zhx2;Batf;Irf3;Arid3c;Fzd2;Nelfcd;Mlxipl;Mcidas;Med11;Foxk2;Rasl11a;Zfp580;Rhebl1;Polr2d;Med30…	2.41% (85/3528)	0.0283652	1.55	NA	NA
5			8.06	GO:1901659	glycosyl compound biosynthetic process	NA	0% (0/33)	1	0	NA	NA	12.12% (4/33)	0.00391842	2.41	18103;23959;54369;56520	Nme2;Nt5e;Nme6;Nme4
5			2.79	GO:1901362	organic cyclic compound biosynthetic process	NA	2.16% (81/3757)	0.00470918	2.33	107569;11555;11568;11906;11977;12029;12142;12389;12394;12416;12445;12642;12724;13593;13983;14130;14652;14683;14842;15511;16002;17855;17872;18028;18091;18514;18616;19223;19285;20319;20416;209011;211151;212712;21413;214133;216154;216853;217069;223646;224691;224829;22658;226641;231506;235047;23971;245263;245841;26901;27273;328274;330502;332110;381373;385674;387609;53314;54131;550619;57265;57314;5880…	Nt5c3;Adrb2;Aebp1;Zfhx3;Atp7a;Bcl6b;Prdm1;Cav1;Runx1;Cbx2;Ccnd3;Ch25h;Clcn2;Ebf3;Esr2;Fcgr2b;Glp1r;Gnas;Gsx1;Hspa1b;Igf2;Mvk;Ppp1r15a;Nfib;Nkx2-5;Pbx1;Peg3;Ptgis;Cavin1;Sfrp2;Shc1;Sirt7;Churc1;Satb2;Tcf4;Tet2;Med16;Wrap53;Trim25;Naprt;Zfp472;Trerf1;Pcgf2;Atf6;Lin54;Zfp809;Papss1;Gm4981;Polr2h;Ss18l2;Pdk4;Zfp459;Zfp82;Mapk15;Sp9;Zfp174;Zhx2;Batf;Irf3;Arid3c;Fzd2;Nelfcd;Mlxipl;Moxd1;Med11;Atp5e;Fox…	2.74% (103/3757)	0.000250135	3.6	104156;107568;107569;107607;107829;11757;11785;11921;12142;12642;12850;13162;13199;13636;13654;13712;13983;14158;14297;14609;15227;15368;15373;15397;16002;16363;16599;170787;170936;17117;18103;18424;18948;19205;19698;20193;20429;20678;208647;20877;209200;210104;212712;21413;216134;216151;216154;21672;21678;216853;21937;22059;22084;22171;224619;224694;225631;225895;225998;226251;22704;227620;23067…	Etv5;Wwp1;Nt5c3;Nod1;Thoc5;Prdx3;Apbb1;Atoh1;Prdm1;Ch25h;Coq7;Slc6a3;Ddn;Efna1;Egr2;Elk1;Esr2;Fer;Fxn;Gja1;Foxf1;Hmox1;Hmx3;Hoxa11os;Igf2;Irf2;Klf3;Hdac10;Zfp369;Amacr;Nme2;Otx2;Pnmt;Ptbp1;Relb;S100a1;Shox2;Sox5;Creb3l2;Aurkb;Dtx3l;Zfp658;Satb2;Tcf4;Pdxk;Polrmt;Med16;Prdx2;Tead3;Wrap53;Tnfrsf1a;Trp53;Tsc2;Tyms;Traf7;Zfp81;Onecut2;Taf6l;Rorb;Ablim1;Zfp46;Uap1l1;Kdm4a;Fbxl19;Nt5e;Nfkbid;Sp8;Zfp82;R…
5			2.67	GO:0009059	macromolecule biosynthetic process	The chemical reactions and pathways resulting in the formation of a macromolecule, any molecule of high relative molecular mass, the structure of which essentially comprises the multiple repetition of units derived, actually or conceptually, from molecules of low relative molecular mass.	2.16% (94/4360)	0.00215024	2.67	11428;11555;11568;11906;11977;12029;12142;12389;12394;12416;12445;13593;13983;14130;14343;14652;14683;14842;15511;16002;16865;17309;17855;17872;18028;18091;18514;18616;19223;19285;194952;19735;20319;20416;209011;211151;212712;21413;214133;216154;216853;217069;224691;224829;225215;22658;226641;228368;231506;234384;235047;241230;245263;245841;26901;269261;328274;330502;332110;381373;385674;387609;5…	Aco1;Adrb2;Aebp1;Zfhx3;Atp7a;Bcl6b;Prdm1;Cav1;Runx1;Cbx2;Ccnd3;Ebf3;Esr2;Fcgr2b;Fut1;Glp1r;Gnas;Gsx1;Hspa1b;Igf2;Eif2d;Mgat3;Mvk;Ppp1r15a;Nfib;Nkx2-5;Pbx1;Peg3;Ptgis;Cavin1;Jmjd4;Rgs2;Sfrp2;Shc1;Sirt7;Churc1;Satb2;Tcf4;Tet2;Med16;Wrap53;Trim25;Zfp472;Trerf1;Rsl24d1;Pcgf2;Atf6;Slc35c1;Lin54;Mpv17l2;Zfp809;St8sia6;Gm4981;Polr2h;Ss18l2;Rpl12;Zfp459;Zfp82;Mapk15;Sp9;Zfp174;Zhx2;Batf;Irf3;Arid3c;Fzd2;…	2.52% (110/4360)	0.00299639	2.52	101612;104156;107045;107568;107607;107829;11757;11785;11921;12142;12850;13199;13636;13654;13712;13983;14158;14609;14731;14936;15227;15368;15373;15397;16002;16363;16599;16865;170787;170936;18424;19205;19698;19935;19944;20193;20429;20528;20678;208647;20877;209200;210104;212712;21413;216151;216154;21672;21678;216853;218271;21937;22059;22084;22171;224045;224619;224694;225631;225895;225998;226251;2270…	Grwd1;Etv5;Lars;Wwp1;Nod1;Thoc5;Prdx3;Apbb1;Atoh1;Prdm1;Coq7;Ddn;Efna1;Egr2;Elk1;Esr2;Fer;Gja1;Gpaa1;Gys1;Foxf1;Hmox1;Hmx3;Hoxa11os;Igf2;Irf2;Klf3;Eif2d;Hdac10;Zfp369;Otx2;Ptbp1;Relb;Mrpl23;Rpl29;S100a1;Shox2;Slc2a4;Sox5;Creb3l2;Aurkb;Dtx3l;Zfp658;Satb2;Tcf4;Polrmt;Med16;Prdx2;Tead3;Wrap53;B4galt7;Tnfrsf1a;Trp53;Tsc2;Tyms;Eif2b5;Traf7;Zfp81;Onecut2;Taf6l;Rorb;Ablim1;Zfp46;Pigu;Gatb;Kdm4a;Guf1;Fbx…
5			2.46	GO:1901576	organic substance biosynthetic process	NA	2.17% (115/5307)	0.000445498	3.35	107569;11428;11555;11568;11898;11906;11977;12029;12036;12142;12389;12394;12416;12445;12642;12651;12724;13593;13983;14130;14343;14652;14683;14718;14842;15356;15511;16002;16847;16865;170439;17309;17855;17872;18028;18091;18514;18616;19223;19285;194952;19735;20319;20416;208982;209011;211151;212712;21413;214133;216154;216853;217069;223646;224691;224829;225215;22658;226641;227358;228368;231506;234384;2…	Nt5c3;Aco1;Adrb2;Aebp1;Ass1;Zfhx3;Atp7a;Bcl6b;Bcat2;Prdm1;Cav1;Runx1;Cbx2;Ccnd3;Ch25h;Chkb;Clcn2;Ebf3;Esr2;Fcgr2b;Fut1;Glp1r;Gnas;Got1;Gsx1;Hmgcl;Hspa1b;Igf2;Lepr;Eif2d;Elovl6;Mgat3;Mvk;Ppp1r15a;Nfib;Nkx2-5;Pbx1;Peg3;Ptgis;Cavin1;Jmjd4;Rgs2;Sfrp2;Shc1;Hmgcll1;Sirt7;Churc1;Satb2;Tcf4;Tet2;Med16;Wrap53;Trim25;Naprt;Zfp472;Trerf1;Rsl24d1;Pcgf2;Atf6;Erfe;Slc35c1;Lin54;Mpv17l2;Zfp809;Papss1;St8sia6;Gm…	2.62% (139/5307)	0.000118737	3.93	100503915;101612;104156;107045;107568;107569;107607;107829;11757;11785;11898;11921;12142;12642;12716;12850;13162;13199;13636;13654;13712;13983;14158;14297;14415;14609;14705;14731;14936;15227;15356;15368;15373;15397;16002;16363;16599;16832;16865;170787;170936;17117;18103;18424;18948;19205;19698;19935;19944;20193;20429;20528;20678;208647;20877;209200;210104;212712;21413;216134;216151;216154;21672;2…	Smpd5;Grwd1;Etv5;Lars;Wwp1;Nt5c3;Nod1;Thoc5;Prdx3;Apbb1;Ass1;Atoh1;Prdm1;Ch25h;Ckmt1;Coq7;Slc6a3;Ddn;Efna1;Egr2;Elk1;Esr2;Fer;Fxn;Gad1;Gja1;Bscl2;Gpaa1;Gys1;Foxf1;Hmgcl;Hmox1;Hmx3;Hoxa11os;Igf2;Irf2;Klf3;Ldhb;Eif2d;Hdac10;Zfp369;Amacr;Nme2;Otx2;Pnmt;Ptbp1;Relb;Mrpl23;Rpl29;S100a1;Shox2;Slc2a4;Sox5;Creb3l2;Aurkb;Dtx3l;Zfp658;Satb2;Tcf4;Pdxk;Polrmt;Med16;Prdx2;Tead3;Wrap53;B4galt7;Tnfrsf1a;Trp53;Ts…
5			8.17	GO:0009081	branched-chain amino acid metabolic process	The chemical reactions and pathways involving amino acids containing a branched carbon skeleton, comprising isoleucine, leucine and valine.	13.04% (3/23)	0.00603829	2.22	12036;15356;208982	Bcat2;Hmgcl;Hmgcll1	4.35% (1/23)	0.368408	0.43	NA	NA
5			8.58	GO:0009083	branched-chain amino acid catabolic process	The chemical reactions and pathways resulting in the breakdown of amino acids containing a branched carbon skeleton, comprising isoleucine, leucine and valine.	15.79% (3/19)	0.00346736	2.46	12036;15356;208982	Bcat2;Hmgcl;Hmgcll1	5.26% (1/19)	0.315839	0.5	NA	NA
5			8.88	GO:0006089	lactate metabolic process	The chemical reactions and pathways involving lactate, the anion of lactic acid.	10% (2/20)	0.0417954	1.38	NA	NA	15% (3/20)	0.00681428	2.17	11474;16832;22059	Actn3;Ldhb;Trp53
5			4.25	GO:0019752	carboxylic acid metabolic process	The chemical reactions and pathways involving carboxylic acids, any organic acid containing one or more carboxyl (COOH) groups or anions (COO-).	3.11% (30/966)	0.000636086	3.2	11428;11474;11898;11977;12036;12286;12389;12445;14718;15356;170439;19223;208982;216188;224530;227358;239017;26569;268860;27273;394436;52538;54122;56421;58805;67111;68837;68977;71941;76267	Aco1;Actn3;Ass1;Atp7a;Bcat2;Cacna1a;Cav1;Ccnd3;Got1;Hmgcl;Elovl6;Ptgis;Hmgcll1;Aldh1l2;Acat3;Erfe;Ogdhl;Slc27a4;Abat;Pdk4;Ugt1a1;Acaa2;Uevld;Pfkp;Mlxipl;Naaa;Foxk2;Haghl;Cars2;Fads1	3.21% (31/966)	0.00583434	2.23	102294;107045;11474;11671;11898;12183;14415;15356;16832;17117;19125;209378;21937;22059;22171;229487;229905;232339;268860;50493;50880;53322;54122;54447;57742;67111;68631;68738;71941;72106;80982	Cyp4v3;Lars;Actn3;Aldh3a2;Ass1;Bpgm;Gad1;Hmgcl;Ldhb;Amacr;Prodh;Itih5;Tnfrsf1a;Trp53;Tyms;Gatb;Kyat3;Ankrd26;Abat;Txnrd1;Scly;Nucb2;Uevld;Asah2;Abhd1;Naaa;Cryl1;Acss1;Cars2;Jmjd8;Cemip
5			4.19	GO:0006082	organic acid metabolic process	The chemical reactions and pathways involving organic acids, any acidic compound containing carbon in covalent linkage.	2.97% (31/1043)	0.0010568	2.98	11428;11474;11898;11977;12036;12286;12389;12445;14718;15356;170439;19223;208982;216188;224530;227358;239017;23971;26569;268860;27273;394436;52538;54122;56421;58805;67111;68837;68977;71941;76267	Aco1;Actn3;Ass1;Atp7a;Bcat2;Cacna1a;Cav1;Ccnd3;Got1;Hmgcl;Elovl6;Ptgis;Hmgcll1;Aldh1l2;Acat3;Erfe;Ogdhl;Papss1;Slc27a4;Abat;Pdk4;Ugt1a1;Acaa2;Uevld;Pfkp;Mlxipl;Naaa;Foxk2;Haghl;Cars2;Fads1	3.16% (33/1043)	0.00556524	2.25	102294;107045;11474;11671;11898;12183;14415;15356;16832;17117;19125;209378;21937;22059;22171;229487;229905;232339;268860;50493;50880;53322;54122;54447;57742;67111;67247;68631;68738;71797;71941;72106;80982	Cyp4v3;Lars;Actn3;Aldh3a2;Ass1;Bpgm;Gad1;Hmgcl;Ldhb;Amacr;Prodh;Itih5;Tnfrsf1a;Trp53;Tyms;Gatb;Kyat3;Ankrd26;Abat;Txnrd1;Scly;Nucb2;Uevld;Asah2;Abhd1;Naaa;Mtarc2;Cryl1;Acss1;Chst13;Cars2;Jmjd8;Cemip
5			4.22	GO:0043436	oxoacid metabolic process	The chemical reactions and pathways involving any oxoacid; an oxoacid is a compound which contains oxygen, at least one other element, and at least one hydrogen bound to oxygen, and which produces a conjugate base by loss of positive hydrogen ion(s) (hydrons).	3.04% (31/1019)	0.000726488	3.14	11428;11474;11898;11977;12036;12286;12389;12445;14718;15356;170439;19223;208982;216188;224530;227358;239017;23971;26569;268860;27273;394436;52538;54122;56421;58805;67111;68837;68977;71941;76267	Aco1;Actn3;Ass1;Atp7a;Bcat2;Cacna1a;Cav1;Ccnd3;Got1;Hmgcl;Elovl6;Ptgis;Hmgcll1;Aldh1l2;Acat3;Erfe;Ogdhl;Papss1;Slc27a4;Abat;Pdk4;Ugt1a1;Acaa2;Uevld;Pfkp;Mlxipl;Naaa;Foxk2;Haghl;Cars2;Fads1	3.24% (33/1019)	0.00394255	2.4	102294;107045;11474;11671;11898;12183;14415;15356;16832;17117;19125;209378;21937;22059;22171;229487;229905;232339;268860;50493;50880;53322;54122;54447;57742;67111;67247;68631;68738;71797;71941;72106;80982	Cyp4v3;Lars;Actn3;Aldh3a2;Ass1;Bpgm;Gad1;Hmgcl;Ldhb;Amacr;Prodh;Itih5;Tnfrsf1a;Trp53;Tyms;Gatb;Kyat3;Ankrd26;Abat;Txnrd1;Scly;Nucb2;Uevld;Asah2;Abhd1;Naaa;Mtarc2;Cryl1;Acss1;Chst13;Cars2;Jmjd8;Cemip
5			9.25	GO:0006007	glucose catabolic process	The chemical reactions and pathways resulting in the breakdown of glucose, the aldohexose gluco-hexose.	17.65% (3/17)	0.00249287	2.6	11474;56421;68837	Actn3;Pfkp;Foxk2	11.76% (2/17)	0.0436098	1.36	NA	NA
5			8.5	GO:0019320	hexose catabolic process	The chemical reactions and pathways resulting in the breakdown of hexose, any monosaccharide with a chain of six carbon atoms in the molecule.	11.54% (3/26)	0.00855029	2.07	11474;56421;68837	Actn3;Pfkp;Foxk2	7.69% (2/26)	0.0928851	1.03	NA	NA
5			1.9	GO:0044260	cellular macromolecule metabolic process	The chemical reactions and pathways involving macromolecules, any molecule of high relative molecular mass, the structure of which essentially comprises the multiple repetition of units derived, actually or conceptually, from molecules of low relative molecular mass, as carried out by individual cells.	2.12% (159/7510)	5.02113e-05	4.3	103743;107589;110173;11428;11539;11555;11568;11640;11906;11977;12029;12142;12305;12333;12380;12389;12394;12416;12445;12683;13033;13593;13867;13983;14130;14229;14343;14652;14683;14800;14842;15511;16002;16772;16847;16865;16913;17309;17311;17855;17872;18028;18091;18260;18514;18616;19134;19223;192652;19266;19267;19285;194952;19735;20319;20320;20416;20614;209011;20971;211151;212712;213990;21413;214133…	Tmem98;Mylk;Manba;Aco1;Adora1;Adrb2;Aebp1;Akap1;Zfhx3;Atp7a;Bcl6b;Prdm1;Ddr1;Capn1;Cast;Cav1;Runx1;Cbx2;Ccnd3;Cidea;Ctsd;Ebf3;Erbb3;Esr2;Fcgr2b;Fkbp5;Fut1;Glp1r;Gnas;Gria2;Gsx1;Hspa1b;Igf2;Lama1;Lepr;Eif2d;Psmb8;Mgat3;Kitl;Mvk;Ppp1r15a;Nfib;Nkx2-5;Ocln;Pbx1;Peg3;Prpf4b;Ptgis;Wdr81;Ptprd;Ptpre;Cavin1;Jmjd4;Rgs2;Sfrp2;Nptn;Shc1;Snap25;Sirt7;Sdc4;Churc1;Satb2;Agap3;Tcf4;Tet2;Med16;Wrap53;Nle1;Trim25…	2.45% (184/7510)	0.000233893	3.63	100336;101612;104156;107045;107568;107607;107829;109270;110078;11302;11757;11785;11921;12028;12142;12367;12388;12850;12905;13033;13175;13199;13636;13654;13712;13983;14158;14297;14609;14731;14936;15227;15368;15373;15397;16002;16363;16599;16865;16912;16913;16971;17035;170787;170936;17279;17314;18003;18103;18189;18207;18424;19156;19186;19205;19253;19698;19935;19944;20193;20429;20614;20678;20714;2086…	Ppp1r8;Grwd1;Etv5;Lars;Wwp1;Nod1;Thoc5;Prr5;Pygb;Aatk;Prdx3;Apbb1;Atoh1;Bax;Prdm1;Casp3;Ctnnd1;Coq7;Cradd;Ctsd;Dclk1;Ddn;Efna1;Egr2;Elk1;Esr2;Fer;Fxn;Gja1;Gpaa1;Gys1;Foxf1;Hmox1;Hmx3;Hoxa11os;Igf2;Irf2;Klf3;Eif2d;Psmb9;Psmb8;Lrp1;Lxn;Hdac10;Zfp369;Melk;Mgmt;Nedd9;Nme2;Nrxn1;Nthl1;Otx2;Psap;Psme1;Ptbp1;Ptpn18;Relb;Mrpl23;Rpl29;S100a1;Shox2;Snap25;Sox5;Serpina3k;Creb3l2;Aurkb;Dtx3l;Itih5;Tyw3;Zfp65…
5			2.27	GO:0010467	gene expression	The process in which a gene's sequence is converted into a mature gene product or products (proteins or RNA). This includes the production of an RNA transcript as well as any processing to produce a mature RNA product or an mRNA or circRNA (for protein-coding genes) and the translation of that mRNA or circRNA into protein. Protein maturation is included when required to form an active form of a p…	2.09% (119/5683)	0.00130822	2.88	103743;109077;11428;11433;11555;11568;11834;11906;11977;12029;12142;12333;12369;12380;12389;12394;12416;12445;12683;13593;13867;13983;14130;14652;14683;14842;15511;16002;16865;17389;17855;17872;18028;18091;18260;18514;18616;19134;19223;19285;194952;19735;20319;20320;20416;209011;211151;212712;21413;214133;216154;216725;217069;22409;224691;224829;225215;22658;226641;229512;231506;234384;235047;245…	Tmem98;Ints5;Aco1;Acp5;Adrb2;Aebp1;Aqr;Zfhx3;Atp7a;Bcl6b;Prdm1;Capn1;Casp7;Cast;Cav1;Runx1;Cbx2;Ccnd3;Cidea;Ebf3;Erbb3;Esr2;Fcgr2b;Glp1r;Gnas;Gsx1;Hspa1b;Igf2;Eif2d;Mmp16;Mvk;Ppp1r15a;Nfib;Nkx2-5;Ocln;Pbx1;Peg3;Prpf4b;Ptgis;Cavin1;Jmjd4;Rgs2;Sfrp2;Nptn;Shc1;Sirt7;Churc1;Satb2;Tcf4;Tet2;Med16;Adamts2;Trim25;Wnt10a;Zfp472;Trerf1;Rsl24d1;Pcgf2;Atf6;Smg5;Lin54;Mpv17l2;Zfp809;Gm4981;Polr2h;Sh3pxd2b;Ss…	2.36% (134/5683)	0.0109141	1.96	NA	NA
5			1.61	GO:0043170	macromolecule metabolic process	The chemical reactions and pathways involving macromolecules, any molecule of high relative molecular mass, the structure of which essentially comprises the multiple repetition of units derived, actually or conceptually, from molecules of low relative molecular mass.	1.97% (177/8998)	0.000943464	3.03	103743;107589;109077;110173;11428;11433;11539;11555;11568;11640;11834;11906;11977;12029;12142;12305;12333;12369;12380;12389;12394;12416;12445;12683;13033;13593;13867;13983;14130;14229;14343;14652;14683;14800;14842;15511;16002;16716;16772;16847;16865;16913;17309;17311;17389;17855;17872;18028;18091;18260;18514;18616;19134;19223;192652;19266;19267;19285;194952;19735;20319;20320;20416;20614;209011;20…	Tmem98;Mylk;Ints5;Manba;Aco1;Acp5;Adora1;Adrb2;Aebp1;Akap1;Aqr;Zfhx3;Atp7a;Bcl6b;Prdm1;Ddr1;Capn1;Casp7;Cast;Cav1;Runx1;Cbx2;Ccnd3;Cidea;Ctsd;Ebf3;Erbb3;Esr2;Fcgr2b;Fkbp5;Fut1;Glp1r;Gnas;Gria2;Gsx1;Hspa1b;Igf2;Ky;Lama1;Lepr;Eif2d;Psmb8;Mgat3;Kitl;Mmp16;Mvk;Ppp1r15a;Nfib;Nkx2-5;Ocln;Pbx1;Peg3;Prpf4b;Ptgis;Wdr81;Ptprd;Ptpre;Cavin1;Jmjd4;Rgs2;Sfrp2;Nptn;Shc1;Snap25;Sirt7;Sdc4;Churc1;Satb2;Agap3;Tcf4…	2.33% (210/8998)	0.00109822	2.96	100336;100900;101612;104156;106869;107045;107522;107568;107607;107829;109270;110078;11302;11757;11758;11785;11921;12028;12142;12367;12388;12850;12905;13033;13175;13199;13636;13654;13712;13983;14158;14297;14609;14731;14936;15227;15368;15373;15397;16002;16363;16535;16599;16865;16912;16913;16971;17035;170787;170936;17279;17314;18003;18103;18189;18207;18424;18442;19156;19186;19205;19253;19698;19935;1…	Ppp1r8;Hscb;Grwd1;Etv5;Tnfaip8;Lars;Ece2;Wwp1;Nod1;Thoc5;Prr5;Pygb;Aatk;Prdx3;Prdx6;Apbb1;Atoh1;Bax;Prdm1;Casp3;Ctnnd1;Coq7;Cradd;Ctsd;Dclk1;Ddn;Efna1;Egr2;Elk1;Esr2;Fer;Fxn;Gja1;Gpaa1;Gys1;Foxf1;Hmox1;Hmx3;Hoxa11os;Igf2;Irf2;Kcnq1;Klf3;Eif2d;Psmb9;Psmb8;Lrp1;Lxn;Hdac10;Zfp369;Melk;Mgmt;Nedd9;Nme2;Nrxn1;Nthl1;Otx2;P2ry2;Psap;Psme1;Ptbp1;Ptpn18;Relb;Mrpl23;Rpl29;S100a1;Shox2;Slc2a4;Snap25;Sox5;Ser…
5			5.1	GO:0005975	carbohydrate metabolic process	The chemical reactions and pathways involving carbohydrates, any of a group of organic compounds based of the general formula Cx(H2O)y. Includes the formation of carbohydrate derivatives by the addition of a carbohydrate residue to another molecule.	3.58% (21/587)	0.000737442	3.13	110173;11474;14343;14718;16002;16847;209011;21351;227358;234515;23827;241230;27273;333433;394436;54122;56421;58805;68837;74245;94181	Manba;Actn3;Fut1;Got1;Igf2;Lepr;Sirt7;Taldo1;Erfe;Inpp4b;Bpnt1;St8sia6;Pdk4;Gpd1l;Ugt1a1;Uevld;Pfkp;Mlxipl;Foxk2;Ctbs;Nans	2.39% (14/587)	0.274252	0.56	NA	NA
5			5.99	GO:0044262	cellular carbohydrate metabolic process	The chemical reactions and pathways involving carbohydrates, any of a group of organic compounds based of the general formula Cx(H2O)y, as carried out by individual cells.	3.78% (11/291)	0.0088208	2.05	11474;14718;16002;16847;209011;227358;234515;23827;27273;394436;68837	Actn3;Got1;Igf2;Lepr;Sirt7;Erfe;Inpp4b;Bpnt1;Pdk4;Ugt1a1;Foxk2	1.72% (5/291)	0.684747	0.16	NA	NA
5			4.4	GO:1901135	carbohydrate derivative metabolic process	NA	2.49% (23/922)	0.0304561	1.52	NA	NA	3.58% (33/922)	0.000800707	3.1	107569;11474;12028;12183;14731;15356;18103;19156;20528;209378;218271;22059;22171;227620;228812;23959;269181;27403;382985;50799;54369;56520;66268;66422;67292;67942;68556;68738;71797;72106;73724;74245;80982	Nt5c3;Actn3;Bax;Bpgm;Gpaa1;Hmgcl;Nme2;Psap;Slc2a4;Itih5;B4galt7;Trp53;Tyms;Uap1l1;Pigu;Nt5e;Mgat4a;Abca7;Rrm2b;Slc25a13;Nme6;Nme4;Pigyl;Dctpp1;Pigc;Atp5g2;Uckl1;Acss1;Chst13;Jmjd8;Mcee;Ctbs;Cemip
5			6.88	GO:1903509	liposaccharide metabolic process	NA	1.09% (1/92)	0.781537	0.11	NA	NA	6.52% (6/92)	0.0098748	2.01	12028;14731;19156;228812;66268;67292	Bax;Gpaa1;Psap;Pigu;Pigyl;Pigc
5			3.78	GO:1901575	organic substance catabolic process	NA	2.45% (49/1998)	0.00283168	2.55	107569;110173;11474;11539;12036;12333;12380;12389;12683;13033;14718;15356;15511;16913;17309;192652;208982;213990;214133;216188;217069;224530;227738;229512;234515;23827;260302;26569;268860;332110;333433;387609;394436;433022;50760;52477;52538;56421;56698;57296;57775;58805;59012;67111;68837;68977;69241;74245;80708	Nt5c3;Manba;Actn3;Adora1;Bcat2;Capn1;Cast;Cav1;Cidea;Ctsd;Got1;Hmgcl;Hspa1b;Psmb8;Mgat3;Wdr81;Hmgcll1;Agap3;Tet2;Aldh1l2;Trim25;Acat3;Lrsam1;Smg5;Inpp4b;Bpnt1;Gga3;Slc27a4;Abat;Mapk15;Gpd1l;Zhx2;Ugt1a1;Plcxd2;Fbxo17;Angel2;Acaa2;Pfkp;Phax;Psmd8;Usp29;Mlxipl;Moxd1;Naaa;Foxk2;Haghl;Polr2d;Ctbs;Pacsin3	2.8% (56/1998)	0.00500495	2.3	100503915;107568;107569;110078;11474;11758;12028;12183;12367;13033;13162;13636;13885;14609;14705;15356;15368;16912;16913;16971;17117;19125;19156;19186;209200;22059;233902;237886;23959;26446;268860;26889;50880;50883;54447;545622;56404;57742;64138;64295;66373;66422;67111;67710;68917;69305;69957;71701;71723;71732;72106;73744;74245;78309;80708;80982	Smpd5;Wwp1;Nt5c3;Pygb;Actn3;Prdx6;Bax;Bpgm;Casp3;Ctsd;Slc6a3;Efna1;Esd;Gja1;Bscl2;Hmgcl;Hmox1;Psmb9;Psmb8;Lrp1;Amacr;Prodh;Psap;Psme1;Dtx3l;Trp53;Fbxl19;Slfn9;Nt5e;Psmb3;Abat;Cln8;Scly;Chek2;Asah2;Ptpn3;Trip4;Abhd1;Ctsz;Tmub1;Lsm5;Dctpp1;Naaa;Polr2g;Hint2;Dcps;Cdc16;Pnpt1;Dhx34;Vps11;Jmjd8;Man2c1;Ctbs;Cul9;Pacsin3;Cemip
5			1.39	GO:0071704	organic substance metabolic process	The chemical reactions and pathways involving an organic substance, any molecular entity containing carbon.	2.05% (215/10496)	3.61406e-06	5.44	103743;107569;107589;109077;110173;11428;11433;11474;11539;11555;11568;11640;11834;11898;11906;11977;12029;12036;12142;12286;12305;12333;12369;12380;12389;12394;12416;12445;12642;12651;12683;12724;13033;13593;13867;13983;14130;14229;14343;14652;14683;14718;14800;14842;14872;15356;15511;16002;16716;16772;16847;16865;16913;170439;17309;17311;17389;17855;17872;18028;18091;18260;18514;18616;19134;192…	Tmem98;Nt5c3;Mylk;Ints5;Manba;Aco1;Acp5;Actn3;Adora1;Adrb2;Aebp1;Akap1;Aqr;Ass1;Zfhx3;Atp7a;Bcl6b;Bcat2;Prdm1;Cacna1a;Ddr1;Capn1;Casp7;Cast;Cav1;Runx1;Cbx2;Ccnd3;Ch25h;Chkb;Cidea;Clcn2;Ctsd;Ebf3;Erbb3;Esr2;Fcgr2b;Fkbp5;Fut1;Glp1r;Gnas;Got1;Gria2;Gsx1;Gstt2;Hmgcl;Hspa1b;Igf2;Ky;Lama1;Lepr;Eif2d;Psmb8;Elovl6;Mgat3;Kitl;Mmp16;Mvk;Ppp1r15a;Nfib;Nkx2-5;Ocln;Pbx1;Peg3;Prpf4b;Ptgis;Wdr81;Ptprd;Ptpre;Cav…	2.45% (257/10496)	1.38645e-06	5.86	100336;100502698;100503915;100900;101612;102294;104156;106869;107045;107522;107568;107569;107607;107829;109270;110078;11302;11474;11671;11757;11758;11785;11898;11921;12028;12142;12183;12367;12388;12642;12716;12850;12905;13033;13162;13175;13199;13636;13654;13712;13885;13983;14158;14297;14415;14609;14705;14731;14936;15227;15356;15368;15373;15397;16002;16363;16535;16599;16832;16865;16912;16913;16971…	Ppp1r8;Rubcn;Smpd5;Hscb;Grwd1;Cyp4v3;Etv5;Tnfaip8;Lars;Ece2;Wwp1;Nt5c3;Nod1;Thoc5;Prr5;Pygb;Aatk;Actn3;Aldh3a2;Prdx3;Prdx6;Apbb1;Ass1;Atoh1;Bax;Prdm1;Bpgm;Casp3;Ctnnd1;Ch25h;Ckmt1;Coq7;Cradd;Ctsd;Slc6a3;Dclk1;Ddn;Efna1;Egr2;Elk1;Esd;Esr2;Fer;Fxn;Gad1;Gja1;Bscl2;Gpaa1;Gys1;Foxf1;Hmgcl;Hmox1;Hmx3;Hoxa11os;Igf2;Irf2;Kcnq1;Klf3;Ldhb;Eif2d;Psmb9;Psmb8;Lrp1;Lxn;Hdac10;Zfp369;Amacr;Melk;Mgmt;Nedd9;Nme2;…
5			2.28	GO:1901360	organic cyclic compound metabolic process	NA	2.07% (113/5449)	0.00259831	2.59	107569;109077;11474;11555;11568;11834;11906;11977;12029;12142;12389;12394;12416;12445;12642;12683;12724;13593;13983;14130;14652;14683;14842;15356;15511;16002;16847;17855;17872;18028;18091;18514;18616;19134;19223;19285;20319;20416;209011;211151;212712;213696;21413;214133;216154;216188;216853;217069;223646;224691;224829;22658;226641;229512;231506;235047;23971;245263;245841;268860;26901;27273;328274…	Nt5c3;Ints5;Actn3;Adrb2;Aebp1;Aqr;Zfhx3;Atp7a;Bcl6b;Prdm1;Cav1;Runx1;Cbx2;Ccnd3;Ch25h;Cidea;Clcn2;Ebf3;Esr2;Fcgr2b;Glp1r;Gnas;Gsx1;Hmgcl;Hspa1b;Igf2;Lepr;Mvk;Ppp1r15a;Nfib;Nkx2-5;Pbx1;Peg3;Prpf4b;Ptgis;Cavin1;Sfrp2;Shc1;Sirt7;Churc1;Satb2;Duoxa1;Tcf4;Tet2;Med16;Aldh1l2;Wrap53;Trim25;Naprt;Zfp472;Trerf1;Pcgf2;Atf6;Smg5;Lin54;Zfp809;Papss1;Gm4981;Polr2h;Abat;Ss18l2;Pdk4;Zfp459;Zfp82;Mapk15;Sp9;Neil…	2.73% (149/5449)	5.37452e-06	5.27	100336;104156;107045;107568;107569;107607;107829;11474;11757;11758;11785;11921;12028;12142;12183;12367;12642;12850;13162;13199;13636;13654;13712;13983;14158;14297;14609;15227;15356;15368;15373;15397;16002;16363;16535;16599;16971;170787;170936;17117;17314;18103;18207;18424;18948;19125;19205;19698;20193;20429;20678;208647;20877;209200;209584;210104;212712;21413;216134;216151;216154;21672;21678;2168…	Ppp1r8;Etv5;Lars;Wwp1;Nt5c3;Nod1;Thoc5;Actn3;Prdx3;Prdx6;Apbb1;Atoh1;Bax;Prdm1;Bpgm;Casp3;Ch25h;Coq7;Slc6a3;Ddn;Efna1;Egr2;Elk1;Esr2;Fer;Fxn;Gja1;Foxf1;Hmgcl;Hmox1;Hmx3;Hoxa11os;Igf2;Irf2;Kcnq1;Klf3;Lrp1;Hdac10;Zfp369;Amacr;Mgmt;Nme2;Nthl1;Otx2;Pnmt;Prodh;Ptbp1;Relb;S100a1;Shox2;Sox5;Creb3l2;Aurkb;Dtx3l;Tyw3;Zfp658;Satb2;Tcf4;Pdxk;Polrmt;Med16;Prdx2;Tead3;Wrap53;Tnfrsf1a;Trp53;Tsc2;Tyms;Traf7;Zfp…
6		Localization	7.67	GO:0006900	vesicle budding from membrane	The evagination of a membrane, resulting in formation of a vesicle.	1.72% (1/58)	0.616437	0.21	NA	NA	8.62% (5/58)	0.00572906	2.24	20528;229593;66397;69608;77371	Slc2a4;Golph3l;Sar1b;Sec24d;Sec24a
6			8.19	GO:0048194	Golgi vesicle budding	The evagination of the Golgi membrane, resulting in formation of a vesicle.	2.94% (1/34)	0.429608	0.37	NA	NA	11.76% (4/34)	0.00437259	2.36	229593;66397;69608;77371	Golph3l;Sar1b;Sec24d;Sec24a
6			6.68	GO:0007034	vacuolar transport	The directed movement of substances into, out of or within a vacuole.	4.55% (7/154)	0.0136208	1.87	NA	NA	7.14% (11/154)	0.000254795	3.59	100502841;11778;16971;170833;19156;209200;269338;54122;55943;71732;81905	Epg5;Ap3s2;Lrp1;Hook2;Psap;Dtx3l;Vps39;Uevld;Stx8;Vps11;Cacng8
6			7.04	GO:0007041	lysosomal transport	The directed movement of substances into, out of or within a lysosome.	5.22% (6/115)	0.0116836	1.93	NA	NA	8.7% (10/115)	9.68201e-05	4.01	100502841;16971;170833;19156;209200;269338;54122;55943;71732;81905	Epg5;Lrp1;Hook2;Psap;Dtx3l;Vps39;Uevld;Stx8;Vps11;Cacng8
6			7.77	GO:0006893	Golgi to plasma membrane transport	The directed movement of substances from the Golgi to the plasma membrane in transport vesicles that move from the trans-Golgi network to the plasma membrane, where they fuse and release their contents by exocytosis.	1.61% (1/62)	0.640998	0.19	NA	NA	8.06% (5/62)	0.00758934	2.12	16897;20336;217517;229593;69940	Llgl1;Exoc4;Stxbp6;Golph3l;Exoc1
6			7.17	GO:0098876	vesicle-mediated transport to the plasma membrane	The directed movement of substances to the plasma membrane in transport vesicles that fuse with the plasma membrane by exocytosis.	3.33% (3/90)	0.183008	0.74	NA	NA	6.67% (6/90)	0.00890848	2.05	16897;20336;20614;217517;229593;69940	Llgl1;Exoc4;Snap25;Stxbp6;Golph3l;Exoc1
6			3.79	GO:0016192	vesicle-mediated transport	A cellular transport process in which transported substances are moved in membrane-bounded vesicles; transported substances are enclosed in the vesicle lumen or located in the vesicle membrane. The process begins with a step that directs a substance to the forming vesicle, and includes vesicle budding and coating. Vesicles are then targeted to, and fuse with, an acceptor membrane.	1.88% (31/1649)	0.235051	0.63	NA	NA	2.85% (47/1649)	0.00740077	2.13	100502698;100502841;11778;14158;15227;15368;15898;16897;16971;170833;18189;18442;20336;20528;20614;208647;209200;217517;22084;225861;229593;233405;252903;269338;27403;320051;54122;55943;56358;56447;56530;66102;66397;67767;67844;67894;68428;69608;69940;70300;71732;73288;77371;80708;80837;80981;81905	Rubcn;Epg5;Ap3s2;Fer;Foxf1;Hmox1;Icam5;Llgl1;Lrp1;Hook2;Nrxn1;P2ry2;Exoc4;Slc2a4;Snap25;Creb3l2;Dtx3l;Stxbp6;Tsc2;Snx32;Golph3l;Vps33b;Ap1s3;Vps39;Abca7;Exph5;Uevld;Stx8;Copz2;Copz1;Cnpy2;Cxcl16;Sar1b;Jagn1;Rab32;Dennd10;Steap3;Sec24d;Exoc1;Fuz;Vps11;Vps50;Sec24a;Pacsin3;Rhoj;Arl4d;Cacng8
6			5.93	GO:0048193	Golgi vesicle transport	The directed movement of substances into, out of or within the Golgi apparatus, mediated by vesicles.	1.47% (4/273)	0.655804	0.18	NA	NA	4.4% (12/273)	0.00848751	2.07	11778;16897;20336;208647;217517;229593;56358;56447;66397;69608;69940;77371	Ap3s2;Llgl1;Exoc4;Creb3l2;Stxbp6;Golph3l;Copz2;Copz1;Sar1b;Sec24d;Exoc1;Sec24a
6			8.58	GO:0048791	calcium ion-regulated exocytosis of neurotransmitter	The release of a neurotransmitter into the synaptic cleft by exocytosis of synaptic vesicles, where the release step is dependent on a rise in cytosolic calcium ion levels.	18.18% (4/22)	0.000408771	3.39	11938;12286;20614;20979	Atp2a2;Cacna1a;Snap25;Syt1	4.55% (1/22)	0.355656	0.45	NA	NA
6			3.36	GO:0051641	cellular localization	A cellular localization process whereby a substance or cellular entity, such as a protein complex or organelle, is transported to, and/or maintained in, a specific location within a cell including the localization of substances or cellular entities to the cell membrane.	2.28% (65/2855)	0.00352699	2.45	100502841;103743;11539;11555;11640;11768;11938;12121;12286;12389;14130;14652;16440;16847;170833;17309;17872;18483;18845;192652;192775;193385;20320;20538;20614;209011;20979;213696;213990;216853;217893;224624;227738;230972;234515;235283;260302;268396;27057;30059;332110;333433;384619;54122;56079;56089;56698;64009;64051;65945;66696;67126;67458;69241;70361;71943;71982;72825;74325;74479;74718;76687;769…	Epg5;Tmem98;Adora1;Adrb2;Akap1;Ap1m2;Atp2a2;Bicd1;Cacna1a;Cav1;Fcgr2b;Glp1r;Itpr3;Lepr;Hook2;Mgat3;Ppp1r15a;Palm;Plxna2;Wdr81;Kcnh6;Ripor2;Nptn;Slc6a2;Snap25;Sirt7;Syt1;Duoxa1;Agap3;Wrap53;Pacs2;Rab40c;Lrsam1;Arhgef16;Inpp4b;Gramd1b;Gga3;Sh3pxd2b;Ncoa4;Timm10;Mapk15;Gpd1l;Kash5;Uevld;Astn2;Ramp3;Phax;Syne1;Sv2a;Clstn1;Snx31;Atp5e;Ergic1;Polr2d;Lman1;Tom1l1;Snx10;Mon1a;Cltb;Snx11;Snx16;Spcs3;Arfip…	2.77% (79/2855)	0.00118521	2.93	100502841;104156;107829;11737;11778;12028;13162;13175;13340;13654;14158;14609;15227;15368;16518;16535;16897;16971;170833;18189;18442;19156;19298;20259;20336;20528;20614;208647;20877;209200;21354;213993;216853;21937;22059;22084;22158;22368;225861;228812;229593;233405;244049;252903;26889;269338;27403;29867;30059;320051;384619;52163;52696;54122;55943;56358;56447;57743;66053;66069;66397;66437;67767;6…	Epg5;Etv5;Thoc5;Anp32a;Ap3s2;Bax;Slc6a3;Dclk1;Slc29a2;Egr2;Fer;Gja1;Foxf1;Hmox1;Kcnj2;Kcnq1;Llgl1;Lrp1;Hook2;Nrxn1;P2ry2;Psap;Pex19;Scin;Exoc4;Slc2a4;Snap25;Creb3l2;Aurkb;Dtx3l;Tap1;Ccdc186;Wrap53;Tnfrsf1a;Trp53;Tsc2;Tulp3;Trpv2;Snx32;Pigu;Golph3l;Vps33b;Mctp2;Ap1s3;Cln8;Vps39;Abca7;Cabp1;Timm10;Exph5;Kash5;Camk1;Zwint;Uevld;Stx8;Copz2;Copz1;Sec61a2;Ppil2;Snupn;Sar1b;Fis1;Jagn1;Rab32;Dennd10;Mrni…
6			4.22	GO:0046907	intracellular transport	The directed movement of substances within a cell.	2.49% (37/1488)	0.0074861	2.13	100502841;11539;11640;11768;11938;12121;14130;14652;170833;192652;20614;209011;213990;234515;235283;260302;27057;30059;332110;54122;56089;56698;64009;66696;67126;67458;69241;70361;71943;71982;72825;74325;74479;74718;76687;76932;77097	Epg5;Adora1;Akap1;Ap1m2;Atp2a2;Bicd1;Fcgr2b;Glp1r;Hook2;Wdr81;Snap25;Sirt7;Agap3;Inpp4b;Gramd1b;Gga3;Ncoa4;Timm10;Mapk15;Uevld;Ramp3;Phax;Syne1;Snx31;Atp5e;Ergic1;Polr2d;Lman1;Tom1l1;Snx10;Mon1a;Cltb;Snx11;Snx16;Spcs3;Arfip2;Tanc2	3.23% (48/1488)	0.000583076	3.23	100502841;107829;11737;11778;12028;13654;14158;15227;15368;170833;19156;19298;20336;20614;208647;209200;21354;213993;21937;22059;22084;225861;233405;252903;269338;29867;30059;320051;52163;54122;55943;56358;56447;57743;66069;66397;66437;67844;67894;68151;69608;69773;71732;71983;73288;77371;80981;80982	Epg5;Thoc5;Anp32a;Ap3s2;Bax;Egr2;Fer;Foxf1;Hmox1;Hook2;Psap;Pex19;Exoc4;Snap25;Creb3l2;Dtx3l;Tap1;Ccdc186;Tnfrsf1a;Trp53;Tsc2;Snx32;Vps33b;Ap1s3;Vps39;Cabp1;Timm10;Exph5;Camk1;Uevld;Stx8;Copz2;Copz1;Sec61a2;Snupn;Sar1b;Fis1;Rab32;Dennd10;Wls;Sec24d;Timm29;Vps11;Tmco6;Vps50;Sec24a;Arl4d;Cemip
6			3.76	GO:0051649	establishment of localization in cell	Any process, occuring in a cell, that localizes a substance or cellular component. This may occur via movement, tethering or selective degradation.	2.25% (47/2093)	0.0163458	1.79	NA	NA	3.2% (67/2093)	5.57037e-05	4.25	100502841;107829;11737;11778;12028;13162;13340;13654;14158;14609;15227;15368;16518;16535;16897;16971;170833;18189;18442;19156;19298;20336;20528;20614;208647;20877;209200;21354;213993;21937;22059;22084;22368;225861;233405;244049;252903;26889;269338;29867;30059;320051;384619;52163;52696;54122;55943;56358;56447;57743;66069;66397;66437;67767;67844;67894;68151;68428;69608;69773;71732;71983;73288;77371…	Epg5;Thoc5;Anp32a;Ap3s2;Bax;Slc6a3;Slc29a2;Egr2;Fer;Gja1;Foxf1;Hmox1;Kcnj2;Kcnq1;Llgl1;Lrp1;Hook2;Nrxn1;P2ry2;Psap;Pex19;Exoc4;Slc2a4;Snap25;Creb3l2;Aurkb;Dtx3l;Tap1;Ccdc186;Tnfrsf1a;Trp53;Tsc2;Trpv2;Snx32;Vps33b;Mctp2;Ap1s3;Cln8;Vps39;Cabp1;Timm10;Exph5;Kash5;Camk1;Zwint;Uevld;Stx8;Copz2;Copz1;Sec61a2;Snupn;Sar1b;Fis1;Jagn1;Rab32;Dennd10;Wls;Steap3;Sec24d;Timm29;Vps11;Tmco6;Vps50;Sec24a;Arl4d;Ce…
6			7.95	GO:0008333	endosome to lysosome transport	The directed movement of substances from endosomes to lysosomes.	7.41% (4/54)	0.0117329	1.93	NA	NA	12.96% (7/54)	8.94631e-05	4.05	100502841;170833;209200;269338;54122;55943;71732	Epg5;Hook2;Dtx3l;Vps39;Uevld;Stx8;Vps11
6			8.17	GO:0045022	early endosome to late endosome transport	The directed movement of substances, in membrane-bounded vesicles, from the early sorting endosomes to the late sorting endosomes; transport occurs along microtubules and can be experimentally blocked with microtubule-depolymerizing drugs.	7.14% (3/42)	0.0311868	1.51	NA	NA	9.52% (4/42)	0.00932664	2.03	170833;55943;67894;71732	Hook2;Stx8;Dennd10;Vps11
6			8.92	GO:0051956	negative regulation of amino acid transport	Any process that stops, prevents, or reduces the frequency, rate or extent of the directed movement of amino acids into, out of or within a cell, or between cells, by means of some agent such as a transporter or pore.	15.79% (3/19)	0.00346736	2.46	11539;19735;268860	Adora1;Rgs2;Abat	5.26% (1/19)	0.315839	0.5	NA	NA
6			6.88	GO:0006835	dicarboxylic acid transport	The directed movement of dicarboxylic acids into, out of or within a cell, or between cells, by means of some agent such as a transporter or pore.	2.22% (2/90)	0.434678	0.36	NA	NA	7.78% (7/90)	0.00205526	2.69	14609;20509;268860;26889;50799;52466;78830	Gja1;Slc19a1;Abat;Cln8;Slc25a13;Slc46a1;Slc25a12
6			9.09	GO:0014051	gamma-aminobutyric acid secretion	The regulated release of gamma-aminobutyric acid by a cell or a tissue. The gamma-aminobutyric acid is the principal inhibitory neurotransmitter in the brain but is also found in several extraneural tissues.	15.79% (3/19)	0.00346736	2.46	12286;268860;64051	Cacna1a;Abat;Sv2a	5.26% (1/19)	0.315839	0.5	NA	NA
6			8.84	GO:0015812	gamma-aminobutyric acid transport	The directed movement of gamma-aminobutyric acid (GABA, 4-aminobutyrate), an amino acid which acts as a neurotransmitter in some organisms, into, out of or within a cell, or between cells, by means of some agent such as a transporter or pore.	13.04% (3/23)	0.00603829	2.22	12286;268860;64051	Cacna1a;Abat;Sv2a	4.35% (1/23)	0.368408	0.43	NA	NA
6			8.4	GO:0015868	purine ribonucleotide transport	The directed movement of a purine ribonucleotide, any compound consisting of a purine ribonucleoside (a purine organic base attached to a ribose sugar) esterified with (ortho)phosphate, into, out of or within a cell.	0% (0/21)	1	0	NA	NA	14.29% (3/21)	0.00783485	2.11	14609;20509;73095	Gja1;Slc19a1;Slc25a42
6			8.4	GO:0051503	adenine nucleotide transport	The directed movement of adenine nucleotides, ATP, ADP, and/or AMP, into, out of or within a cell, or between cells, by means of some agent such as a transporter or pore.	0% (0/21)	1	0	NA	NA	14.29% (3/21)	0.00783485	2.11	14609;20509;73095	Gja1;Slc19a1;Slc25a42
6			8.09	GO:0006862	nucleotide transport	The directed movement of a nucleotide, any compound consisting of a nucleoside that is esterified with (ortho)phosphate, into, out of or within a cell.	7.69% (2/26)	0.0670853	1.17	NA	NA	15.38% (4/26)	0.00159611	2.8	100502841;14609;20509;73095	Epg5;Gja1;Slc19a1;Slc25a42
6			8.31	GO:0015865	purine nucleotide transport	The directed movement of a purine nucleotide, any compound consisting of a purine nucleoside esterified with (ortho)phosphate, into, out of or within a cell.	0% (0/22)	1	0	NA	NA	13.64% (3/22)	0.00894069	2.05	14609;20509;73095	Gja1;Slc19a1;Slc25a42
6			8.67	GO:0072530	purine-containing compound transmembrane transport	The process in which a purine-containing compound is transported across a membrane. A purine-containing compound is any compound that contains purine or a formal derivative thereof.	0% (0/15)	1	0	NA	NA	20% (3/15)	0.0029262	2.53	13340;20509;73095	Slc29a2;Slc19a1;Slc25a42
6			3.49	GO:0071702	organic substance transport	The directed movement of organic substances into, out of or within a cell, or between cells, or within a multicellular organism by means of some agent such as a transporter or pore. An organic substance is a molecular entity that contains carbon.	2.29% (57/2494)	0.00587836	2.23	100502841;11539;11640;11768;12286;12389;12394;13867;14652;16847;170833;18260;192287;19285;19735;20538;20614;209011;209630;20979;213696;213990;22067;227358;227738;228368;235283;260302;26569;268860;27057;30059;332110;54122;54563;56079;56089;56183;56698;64051;65945;65970;66696;66795;67283;69241;70361;70484;71943;71982;72825;74325;74479;74718;76459;76687;76932	Epg5;Adora1;Akap1;Ap1m2;Cacna1a;Cav1;Runx1;Erbb3;Glp1r;Lepr;Hook2;Ocln;Slc25a36;Cavin1;Rgs2;Slc6a2;Snap25;Sirt7;Frmd4a;Syt1;Duoxa1;Agap3;Trpc5;Erfe;Lrsam1;Slc35c1;Gramd1b;Gga3;Slc27a4;Abat;Ncoa4;Timm10;Mapk15;Uevld;Nup210;Astn2;Ramp3;Nmu;Phax;Sv2a;Clstn1;Lima1;Snx31;Atg10;Slc25a19;Polr2d;Lman1;Slc35d2;Tom1l1;Snx10;Mon1a;Cltb;Snx11;Snx16;Car12;Spcs3;Arfip2	3.01% (75/2494)	0.00014318	3.84	100502841;107829;11778;11785;12028;13162;13340;13654;14609;16535;16897;16971;170833;18189;18442;19156;19298;20336;20509;20528;20614;209200;21354;213993;21937;22059;22084;225861;229593;231287;233405;24060;252903;268860;26889;269338;27403;27883;29867;30059;320051;50799;52163;52466;53322;54122;55943;56358;56399;56447;56520;57743;66069;66397;66437;67767;67844;67894;68151;68428;69309;69773;69940;70300…	Epg5;Thoc5;Ap3s2;Apbb1;Bax;Slc6a3;Slc29a2;Egr2;Gja1;Kcnq1;Llgl1;Lrp1;Hook2;Nrxn1;P2ry2;Psap;Pex19;Exoc4;Slc19a1;Slc2a4;Snap25;Dtx3l;Tap1;Ccdc186;Tnfrsf1a;Trp53;Tsc2;Snx32;Golph3l;Atp10d;Vps33b;Slc35a1;Ap1s3;Abat;Cln8;Vps39;Abca7;Tango2;Cabp1;Timm10;Exph5;Slc25a13;Camk1;Slc46a1;Nucb2;Uevld;Stx8;Copz2;Akap8;Copz1;Nme4;Sec61a2;Snupn;Sar1b;Fis1;Jagn1;Rab32;Dennd10;Wls;Steap3;Slc16a13;Timm29;Exoc1;Fuz…
6			6.99	GO:1901264	carbohydrate derivative transport	NA	2.3% (2/87)	0.417814	0.38	NA	NA	8.05% (7/87)	0.00169048	2.77	13340;14609;18442;19156;20509;24060;73095	Slc29a2;Gja1;P2ry2;Psap;Slc19a1;Slc35a1;Slc25a42
6			4.1	GO:0042886	amide transport	The directed movement of an amide, any compound containing one, two, or three acyl groups attached to a nitrogen atom, into, out of or within a cell, or between cells, by means of some agent such as a transporter or pore.	2.12% (37/1745)	0.0633629	1.2	NA	NA	3.38% (59/1745)	3.6241e-05	4.44	107829;11778;11785;12028;13654;14609;16535;16897;16971;170833;18189;19156;19298;20336;20509;20614;209200;21354;213993;21937;22059;22084;225861;229593;233405;252903;268860;269338;27883;29867;30059;320051;52163;52466;53322;54122;55943;56358;56399;56447;57743;66069;66397;66437;67767;67844;67894;68151;68428;69773;69940;70300;71732;71983;73288;77371;80981;80982;81905	Thoc5;Ap3s2;Apbb1;Bax;Egr2;Gja1;Kcnq1;Llgl1;Lrp1;Hook2;Nrxn1;Psap;Pex19;Exoc4;Slc19a1;Snap25;Dtx3l;Tap1;Ccdc186;Tnfrsf1a;Trp53;Tsc2;Snx32;Golph3l;Vps33b;Ap1s3;Abat;Vps39;Tango2;Cabp1;Timm10;Exph5;Camk1;Slc46a1;Nucb2;Uevld;Stx8;Copz2;Akap8;Copz1;Sec61a2;Snupn;Sar1b;Fis1;Jagn1;Rab32;Dennd10;Wls;Steap3;Timm29;Exoc1;Fuz;Vps11;Tmco6;Vps50;Sec24a;Arl4d;Cemip;Cacng8
6			3.77	GO:0071705	nitrogen compound transport	The directed movement of nitrogen-containing compounds into, out of or within a cell, or between cells, by means of some agent such as a transporter or pore.	2.27% (47/2067)	0.0133062	1.88	NA	NA	3.39% (70/2067)	5.802e-06	5.24	100502841;107723;107829;11778;11785;12028;13162;13340;13654;14609;16535;16897;16971;170833;18189;18442;19156;19298;20336;20509;20614;209200;21354;213993;21937;22059;22084;225861;229593;233405;24060;252903;268860;26889;269338;27883;29867;30059;320051;50799;52163;52466;53322;54122;55943;56358;56399;56447;57743;66069;66397;66437;67767;67844;67894;68151;68428;69773;69940;70300;71701;71732;71983;73095…	Epg5;Slc12a6;Thoc5;Ap3s2;Apbb1;Bax;Slc6a3;Slc29a2;Egr2;Gja1;Kcnq1;Llgl1;Lrp1;Hook2;Nrxn1;P2ry2;Psap;Pex19;Exoc4;Slc19a1;Snap25;Dtx3l;Tap1;Ccdc186;Tnfrsf1a;Trp53;Tsc2;Snx32;Golph3l;Vps33b;Slc35a1;Ap1s3;Abat;Cln8;Vps39;Tango2;Cabp1;Timm10;Exph5;Slc25a13;Camk1;Slc46a1;Nucb2;Uevld;Stx8;Copz2;Akap8;Copz1;Sec61a2;Snupn;Sar1b;Fis1;Jagn1;Rab32;Dennd10;Wls;Steap3;Timm29;Exoc1;Fuz;Pnpt1;Vps11;Tmco6;Slc25a4…
6			5.95	GO:0098657	import into cell	The directed movement of some substance from outside of a cell into a cell. This may occur via transport across the plasma membrane or via endocytosis.	3.01% (8/266)	0.0721543	1.14	NA	NA	4.89% (13/266)	0.00259569	2.59	107723;13162;13340;16518;16535;20509;20614;22368;26889;52466;68428;81905;83704	Slc12a6;Slc6a3;Slc29a2;Kcnj2;Kcnq1;Slc19a1;Snap25;Trpv2;Cln8;Slc46a1;Steap3;Cacng8;Slc12a9
6			2.44	GO:0051234	establishment of localization	Any process that localizes a substance or cellular component. This may occur via movement, tethering or selective degradation.	2.08% (97/4669)	0.00555291	2.26	100502841;102443351;107589;11428;11539;11555;11640;11768;11938;11977;12121;12286;12305;12389;12394;12724;13033;13867;14130;14199;14652;14683;14800;15511;16440;16847;170738;170833;18091;18260;192287;192652;192775;19285;193385;19735;20538;20614;209011;209630;20971;20979;210741;213696;213990;216853;217353;22067;227358;227738;228368;234515;235283;237987;260302;26569;268860;27057;30059;332110;333433;3…	Epg5;Xntrpc;Mylk;Aco1;Adora1;Adrb2;Akap1;Ap1m2;Atp2a2;Atp7a;Bicd1;Cacna1a;Ddr1;Cav1;Runx1;Clcn2;Ctsd;Erbb3;Fcgr2b;Fhl1;Glp1r;Gnas;Gria2;Hspa1b;Itpr3;Lepr;Kcnh7;Hook2;Nkx2-5;Ocln;Slc25a36;Wdr81;Kcnh6;Cavin1;Ripor2;Rgs2;Slc6a2;Snap25;Sirt7;Frmd4a;Sdc4;Syt1;Kcnk12;Duoxa1;Agap3;Wrap53;Tmc6;Trpc5;Erfe;Lrsam1;Slc35c1;Inpp4b;Gramd1b;Otop2;Gga3;Slc27a4;Abat;Ncoa4;Timm10;Mapk15;Gpd1l;Kash5;Acaa2;Uevld;Nup…	2.4% (112/4669)	0.013093	1.88	NA	NA
6			2.47	GO:0006810	transport	The directed movement of substances (such as macromolecules, small molecules, ions) or cellular components (such as complexes and organelles) into, out of or within a cell, or between cells, or within a multicellular organism by means of some agent such as a transporter, pore or motor protein.	2.06% (93/4510)	0.00829479	2.08	100502841;102443351;107589;11428;11539;11555;11640;11768;11938;11977;12121;12286;12305;12389;12394;12724;13867;14130;14199;14652;14683;14800;15511;16440;16847;170738;170833;18091;18260;192287;192652;192775;19285;19735;20538;20614;209011;209630;20971;20979;210741;213696;213990;217353;22067;227358;227738;228368;234515;235283;237987;260302;26569;268860;27057;30059;332110;333433;52538;54122;54563;560…	Epg5;Xntrpc;Mylk;Aco1;Adora1;Adrb2;Akap1;Ap1m2;Atp2a2;Atp7a;Bicd1;Cacna1a;Ddr1;Cav1;Runx1;Clcn2;Erbb3;Fcgr2b;Fhl1;Glp1r;Gnas;Gria2;Hspa1b;Itpr3;Lepr;Kcnh7;Hook2;Nkx2-5;Ocln;Slc25a36;Wdr81;Kcnh6;Cavin1;Rgs2;Slc6a2;Snap25;Sirt7;Frmd4a;Sdc4;Syt1;Kcnk12;Duoxa1;Agap3;Tmc6;Trpc5;Erfe;Lrsam1;Slc35c1;Inpp4b;Gramd1b;Otop2;Gga3;Slc27a4;Abat;Ncoa4;Timm10;Mapk15;Gpd1l;Acaa2;Uevld;Nup210;Astn2;Ramp3;Nmu;Phax;…	2.33% (105/4510)	0.0352776	1.45	NA	NA
6			6.33	GO:0006839	mitochondrial transport	Transport of substances into, out of or within a mitochondrion.	2.36% (5/212)	0.267472	0.57	NA	NA	4.72% (10/212)	0.00984619	2.01	12028;12050;22059;30059;50799;66437;69773;71701;74919;78830	Bax;Bcl2l2;Trp53;Timm10;Slc25a13;Fis1;Timm29;Pnpt1;Slc35f6;Slc25a12
7		Establishment of localization	7.99	GO:0072666	establishment of protein localization to vacuole	The directed movement of a protein to a specific location in a vacuole.	8.16% (4/49)	0.00837587	2.08	260302;27057;72825;74718	Gga3;Ncoa4;Mon1a;Snx16	2.04% (1/49)	0.624512	0.2	NA	NA
7			8.74	GO:0006622	protein targeting to lysosome	The process of directing proteins towards the lysosome using signals contained within the protein.	14.29% (3/21)	0.00464545	2.33	260302;27057;74718	Gga3;Ncoa4;Snx16	0% (0/21)	1	0	NA	NA
7			8.33	GO:0006623	protein targeting to vacuole	The process of directing proteins towards the vacuole, usually using signals contained within the protein.	11.11% (4/36)	0.00274906	2.56	260302;27057;72825;74718	Gga3;Ncoa4;Mon1a;Snx16	0% (0/36)	1	0	NA	NA
7			8.74	GO:0051204	protein insertion into mitochondrial membrane	The process that results in the incorporation of a protein into a mitochondrial membrane.	4.76% (1/21)	0.292959	0.53	NA	NA	14.29% (3/21)	0.00783485	2.11	12028;30059;69773	Bax;Timm10;Timm29
7			4.86	GO:0006886	intracellular protein transport	The directed movement of proteins in a cell, including the movement of proteins between specific compartments or structures within a cell, such as organelles of a eukaryotic cell.	2.14% (20/936)	0.136667	0.86	NA	NA	3.42% (32/936)	0.00198852	2.7	107829;11778;12028;13654;19156;19298;20336;21937;22059;22084;233405;252903;269338;29867;30059;320051;52163;55943;56358;56447;57743;66069;66397;66437;67844;68151;69773;71732;71983;77371;80981;80982	Thoc5;Ap3s2;Bax;Egr2;Psap;Pex19;Exoc4;Tnfrsf1a;Trp53;Tsc2;Vps33b;Ap1s3;Vps39;Cabp1;Timm10;Exph5;Camk1;Stx8;Copz2;Copz1;Sec61a2;Snupn;Sar1b;Fis1;Rab32;Wls;Timm29;Vps11;Tmco6;Sec24a;Arl4d;Cemip
7			4.18	GO:0015031	protein transport	The directed movement of proteins into, out of or within a cell, or between cells, by means of some agent such as a transporter or pore.	2.23% (37/1656)	0.0335868	1.47	NA	NA	3.38% (56/1656)	5.80601e-05	4.24	107829;11778;11785;12028;13654;14609;16535;16897;16971;170833;18189;19156;19298;20336;20614;209200;21354;213993;21937;22059;22084;225861;229593;233405;252903;268860;269338;27883;29867;30059;320051;52163;54122;55943;56358;56399;56447;57743;66069;66397;66437;67767;67844;67894;68151;68428;69773;69940;70300;71732;71983;73288;77371;80981;80982;81905	Thoc5;Ap3s2;Apbb1;Bax;Egr2;Gja1;Kcnq1;Llgl1;Lrp1;Hook2;Nrxn1;Psap;Pex19;Exoc4;Snap25;Dtx3l;Tap1;Ccdc186;Tnfrsf1a;Trp53;Tsc2;Snx32;Golph3l;Vps33b;Ap1s3;Abat;Vps39;Tango2;Cabp1;Timm10;Exph5;Camk1;Uevld;Stx8;Copz2;Akap8;Copz1;Sec61a2;Snupn;Sar1b;Fis1;Jagn1;Rab32;Dennd10;Wls;Steap3;Timm29;Exoc1;Fuz;Vps11;Tmco6;Vps50;Sec24a;Arl4d;Cemip;Cacng8
7			5.68	GO:0002790	peptide secretion	The controlled release of a peptide from a cell or a tissue.	1.78% (8/450)	0.456366	0.34	NA	NA	4% (18/450)	0.00394796	2.4	11785;14609;16535;16897;16971;18189;19156;213993;229593;268860;27883;320051;53322;67767;68151;68428;69940;77371	Apbb1;Gja1;Kcnq1;Llgl1;Lrp1;Nrxn1;Psap;Ccdc186;Golph3l;Abat;Tango2;Exph5;Nucb2;Jagn1;Wls;Steap3;Exoc1;Sec24a
7			4.13	GO:0015833	peptide transport	The directed movement of peptides, compounds of two or more amino acids where the alpha carboxyl group of one is bound to the alpha amino group of another, into, out of or within a cell, or between cells, by means of some agent such as a transporter or pore.	2.16% (37/1714)	0.0513749	1.29	NA	NA	3.33% (57/1714)	7.80538e-05	4.11	107829;11778;11785;12028;13654;14609;16535;16897;16971;170833;18189;19156;19298;20336;20614;209200;21354;213993;21937;22059;22084;225861;229593;233405;252903;268860;269338;27883;29867;30059;320051;52163;53322;54122;55943;56358;56399;56447;57743;66069;66397;66437;67767;67844;67894;68151;68428;69773;69940;70300;71732;71983;73288;77371;80981;80982;81905	Thoc5;Ap3s2;Apbb1;Bax;Egr2;Gja1;Kcnq1;Llgl1;Lrp1;Hook2;Nrxn1;Psap;Pex19;Exoc4;Snap25;Dtx3l;Tap1;Ccdc186;Tnfrsf1a;Trp53;Tsc2;Snx32;Golph3l;Vps33b;Ap1s3;Abat;Vps39;Tango2;Cabp1;Timm10;Exph5;Camk1;Nucb2;Uevld;Stx8;Copz2;Akap8;Copz1;Sec61a2;Snupn;Sar1b;Fis1;Jagn1;Rab32;Dennd10;Wls;Steap3;Timm29;Exoc1;Fuz;Vps11;Tmco6;Vps50;Sec24a;Arl4d;Cemip;Cacng8
7			5.97	GO:0002791	regulation of peptide secretion	Any process that modulates the frequency, rate, or extent of peptide secretion.	1.74% (6/344)	0.494838	0.31	NA	NA	4.07% (14/344)	0.00897353	2.05	11785;14609;16535;16897;16971;18189;229593;268860;320051;53322;67767;68151;69940;77371	Apbb1;Gja1;Kcnq1;Llgl1;Lrp1;Nrxn1;Golph3l;Abat;Exph5;Nucb2;Jagn1;Wls;Exoc1;Sec24a
7			5.4	GO:0090087	regulation of peptide transport	Any process that modulates the frequency, rate or extent of the directed movement of peptides, compounds of two or more amino acids where the alpha carboxyl group of one is bound to the alpha amino group of another, into, out of or within a cell, or between cells, by means of some agent such as a transporter or pore.	1.28% (8/623)	0.802881	0.1	NA	NA	3.53% (22/623)	0.0066807	2.18	107829;11785;14609;16535;16897;16971;18189;20336;21937;229593;268860;29867;320051;52163;53322;66397;66437;67767;68151;69940;77371;80982	Thoc5;Apbb1;Gja1;Kcnq1;Llgl1;Lrp1;Nrxn1;Exoc4;Tnfrsf1a;Golph3l;Abat;Cabp1;Exph5;Camk1;Nucb2;Sar1b;Fis1;Jagn1;Wls;Exoc1;Sec24a;Cemip
7			6.18	GO:0051222	positive regulation of protein transport	Any process that activates or increases the frequency, rate or extent of the directed movement of a protein into, out of or within a cell, or between cells, by means of some agent such as a transporter or pore.	1.56% (5/321)	0.605959	0.22	NA	NA	4.36% (14/321)	0.00500601	2.3	11785;14609;16971;21937;229593;268860;320051;52163;66397;66437;68151;69940;77371;80982	Apbb1;Gja1;Lrp1;Tnfrsf1a;Golph3l;Abat;Exph5;Camk1;Sar1b;Fis1;Wls;Exoc1;Sec24a;Cemip
7			5.52	GO:0051223	regulation of protein transport	Any process that modulates the frequency, rate or extent of the directed movement of a protein into, out of or within a cell, or between cells, by means of some agent such as a transporter or pore.	1.21% (7/579)	0.838821	0.08	NA	NA	3.63% (21/579)	0.00594372	2.23	107829;11785;14609;16535;16897;16971;18189;20336;21937;229593;268860;29867;320051;52163;66397;66437;67767;68151;69940;77371;80982	Thoc5;Apbb1;Gja1;Kcnq1;Llgl1;Lrp1;Nrxn1;Exoc4;Tnfrsf1a;Golph3l;Abat;Cabp1;Exph5;Camk1;Sar1b;Fis1;Jagn1;Wls;Exoc1;Sec24a;Cemip
7			5.89	GO:0009306	protein secretion	The controlled release of proteins from a cell.	1.76% (7/397)	0.47432	0.32	NA	NA	4.28% (17/397)	0.00253344	2.6	11785;14609;16535;16897;16971;18189;19156;213993;229593;268860;27883;320051;67767;68151;68428;69940;77371	Apbb1;Gja1;Kcnq1;Llgl1;Lrp1;Nrxn1;Psap;Ccdc186;Golph3l;Abat;Tango2;Exph5;Jagn1;Wls;Steap3;Exoc1;Sec24a
7			6.18	GO:0050708	regulation of protein secretion	Any process that modulates the frequency, rate or extent of the controlled release of a protein from a cell.	1.66% (5/302)	0.551816	0.26	NA	NA	4.3% (13/302)	0.00744831	2.13	11785;14609;16535;16897;16971;18189;229593;268860;320051;67767;68151;69940;77371	Apbb1;Gja1;Kcnq1;Llgl1;Lrp1;Nrxn1;Golph3l;Abat;Exph5;Jagn1;Wls;Exoc1;Sec24a
7			6.85	GO:0050714	positive regulation of protein secretion	Any process that activates or increases the frequency, rate or extent of the controlled release of a protein from a cell.	3.01% (5/166)	0.137259	0.86	NA	NA	5.42% (9/166)	0.00590544	2.23	11785;14609;16971;229593;268860;320051;68151;69940;77371	Apbb1;Gja1;Lrp1;Golph3l;Abat;Exph5;Wls;Exoc1;Sec24a
8		Localization	4.04	GO:0034613	cellular protein localization	Any process in which a protein is transported to, and/or maintained in, a specific location at the level of a cell. Localization at the cellular level encompasses movement within the cell, from within the cell to the cell surface, or from one location to another at the surface of a cell.	2.36% (43/1824)	0.00996765	2	103743;11539;11640;11768;12121;12286;12389;14652;17309;17872;18483;193385;20320;20614;209011;213696;213990;216853;217893;224624;227738;230972;260302;268396;27057;30059;332110;333433;56079;56089;64009;65945;66696;69241;71943;71982;72825;74325;74479;74718;76687;76932;80297	Tmem98;Adora1;Akap1;Ap1m2;Bicd1;Cacna1a;Cav1;Glp1r;Mgat3;Ppp1r15a;Palm;Ripor2;Nptn;Snap25;Sirt7;Duoxa1;Agap3;Wrap53;Pacs2;Rab40c;Lrsam1;Arhgef16;Gga3;Sh3pxd2b;Ncoa4;Timm10;Mapk15;Gpd1l;Astn2;Ramp3;Syne1;Clstn1;Snx31;Polr2d;Tom1l1;Snx10;Mon1a;Cltb;Snx11;Snx16;Spcs3;Arfip2;Sptbn4	2.8% (51/1824)	0.00765557	2.12	104156;107829;11778;12028;13175;13654;14609;16971;18189;19156;19298;20259;20336;20614;20877;209200;216853;21937;22059;22084;22158;228812;229593;233405;252903;269338;27403;29867;30059;320051;52163;55943;56358;56447;57743;66053;66069;66397;66437;67844;68067;68151;69660;69773;71732;71983;77371;80981;80982;81905;83815	Etv5;Thoc5;Ap3s2;Bax;Dclk1;Egr2;Gja1;Lrp1;Nrxn1;Psap;Pex19;Scin;Exoc4;Snap25;Aurkb;Dtx3l;Wrap53;Tnfrsf1a;Trp53;Tsc2;Tulp3;Pigu;Golph3l;Vps33b;Ap1s3;Vps39;Abca7;Cabp1;Timm10;Exph5;Camk1;Stx8;Copz2;Copz1;Sec61a2;Ppil2;Snupn;Sar1b;Fis1;Rab32;Mrnip;Wls;Tmbim1;Timm29;Vps11;Tmco6;Sec24a;Arl4d;Cemip;Cacng8;Cenpq
8			4.04	GO:0070727	cellular macromolecule localization	Any process in which a macromolecule is transported to, and/or maintained in, a specific location at the level of a cell. Localization at the cellular level encompasses movement within the cell, from within the cell to the cell surface, or from one location to another at the surface of a cell.	2.35% (43/1831)	0.0106066	1.97	NA	NA	2.79% (51/1831)	0.0082144	2.09	104156;107829;11778;12028;13175;13654;14609;16971;18189;19156;19298;20259;20336;20614;20877;209200;216853;21937;22059;22084;22158;228812;229593;233405;252903;269338;27403;29867;30059;320051;52163;55943;56358;56447;57743;66053;66069;66397;66437;67844;68067;68151;69660;69773;71732;71983;77371;80981;80982;81905;83815	Etv5;Thoc5;Ap3s2;Bax;Dclk1;Egr2;Gja1;Lrp1;Nrxn1;Psap;Pex19;Scin;Exoc4;Snap25;Aurkb;Dtx3l;Wrap53;Tnfrsf1a;Trp53;Tsc2;Tulp3;Pigu;Golph3l;Vps33b;Ap1s3;Vps39;Abca7;Cabp1;Timm10;Exph5;Camk1;Stx8;Copz2;Copz1;Sec61a2;Ppil2;Snupn;Sar1b;Fis1;Rab32;Mrnip;Wls;Tmbim1;Timm29;Vps11;Tmco6;Sec24a;Arl4d;Cemip;Cacng8;Cenpq
8			3.38	GO:0033036	macromolecule localization	Any process in which a macromolecule is transported to, or maintained in, a specific location.	2.27% (68/2996)	0.00303578	2.52	103743;11539;11640;11768;12121;12286;12389;12394;12683;13033;14652;14800;16847;170833;17309;17872;18483;192662;19285;193385;20320;20614;209011;209630;213696;213990;216853;217069;217893;22067;224624;227358;227738;230972;235283;260302;26569;268396;268860;27057;30059;319504;332110;333433;54122;54563;56079;56089;56183;56698;64009;65945;65970;66696;66795;69241;70361;71943;71982;72825;74325;74479;74718…	Tmem98;Adora1;Akap1;Ap1m2;Bicd1;Cacna1a;Cav1;Runx1;Cidea;Ctsd;Glp1r;Gria2;Lepr;Hook2;Mgat3;Ppp1r15a;Palm;Arhgdia;Cavin1;Ripor2;Nptn;Snap25;Sirt7;Frmd4a;Duoxa1;Agap3;Wrap53;Trim25;Pacs2;Trpc5;Rab40c;Erfe;Lrsam1;Arhgef16;Gramd1b;Gga3;Slc27a4;Sh3pxd2b;Abat;Ncoa4;Timm10;Nrcam;Mapk15;Gpd1l;Uevld;Nup210;Astn2;Ramp3;Nmu;Phax;Syne1;Clstn1;Lima1;Snx31;Atg10;Polr2d;Lman1;Tom1l1;Snx10;Mon1a;Cltb;Snx11;Snx16…	2.74% (82/2996)	0.00129662	2.89	104156;107829;11778;11785;12028;13033;13175;13654;14119;14609;14705;16535;16897;16971;170833;18189;18442;19156;19298;20259;20336;20614;20877;209200;21354;213993;216853;21937;22059;22084;22158;224619;225861;228812;229593;231287;233405;233806;252903;268860;269338;27403;27883;29867;30059;320051;52163;53322;54122;55943;56358;56399;56447;56520;57743;57915;66053;66069;66397;66437;67767;67844;67894;6806…	Etv5;Thoc5;Ap3s2;Apbb1;Bax;Ctsd;Dclk1;Egr2;Fbn2;Gja1;Bscl2;Kcnq1;Llgl1;Lrp1;Hook2;Nrxn1;P2ry2;Psap;Pex19;Scin;Exoc4;Snap25;Aurkb;Dtx3l;Tap1;Ccdc186;Wrap53;Tnfrsf1a;Trp53;Tsc2;Tulp3;Traf7;Snx32;Pigu;Golph3l;Atp10d;Vps33b;Tmem159;Ap1s3;Abat;Vps39;Abca7;Tango2;Cabp1;Timm10;Exph5;Camk1;Nucb2;Uevld;Stx8;Copz2;Akap8;Copz1;Nme4;Sec61a2;Tbc1d1;Ppil2;Snupn;Sar1b;Fis1;Jagn1;Rab32;Dennd10;Mrnip;Wls;Steap3;T…
8			2.12	GO:0051179	localization	Any process in which a cell, a substance, or a cellular entity, such as a protein complex or organelle, is transported, tethered to or otherwise maintained in a specific location. In the case of substances, localization may also be achieved via selective degradation.	2.18% (136/6236)	6.65222e-05	4.18	100502841;102443351;103743;107589;11428;11433;11539;11555;11640;11768;11938;11977;12121;12286;12305;12333;12389;12394;12642;12683;12724;13033;13867;13983;14130;14199;14270;14343;14587;14652;14683;14800;15511;16002;16440;16772;16847;170738;170833;17181;17309;17311;17872;18091;18260;18483;18845;192287;192652;192662;192775;19285;193385;19735;20319;20320;20355;20538;20614;209011;209630;20971;20979;21…	Epg5;Xntrpc;Tmem98;Mylk;Aco1;Acp5;Adora1;Adrb2;Akap1;Ap1m2;Atp2a2;Atp7a;Bicd1;Cacna1a;Ddr1;Capn1;Cav1;Runx1;Ch25h;Cidea;Clcn2;Ctsd;Erbb3;Esr2;Fcgr2b;Fhl1;Srgap2;Fut1;Gfra3;Glp1r;Gnas;Gria2;Hspa1b;Igf2;Itpr3;Lama1;Lepr;Kcnh7;Hook2;Matn2;Mgat3;Kitl;Ppp1r15a;Nkx2-5;Ocln;Palm;Plxna2;Slc25a36;Wdr81;Arhgdia;Kcnh6;Cavin1;Ripor2;Rgs2;Sfrp2;Nptn;Sema4f;Slc6a2;Snap25;Sirt7;Frmd4a;Sdc4;Syt1;Kcnk12;Satb2;Duo…	2.39% (149/6236)	0.0040026	2.4	100502698;100502841;104156;107723;107829;109270;11737;11778;11785;11921;12028;12050;12642;13033;13162;13175;13340;13636;13654;13983;14119;14158;14297;14609;14705;15227;15368;15898;16002;16518;16535;16897;16971;170833;17181;18003;18189;18442;19156;19298;20193;20259;20336;20346;20509;20528;20614;208647;20877;209200;212712;21354;213993;216853;217517;219140;21937;22059;22084;22158;22368;22415;224619;…	Rubcn;Epg5;Etv5;Slc12a6;Thoc5;Prr5;Anp32a;Ap3s2;Apbb1;Atoh1;Bax;Bcl2l2;Ch25h;Ctsd;Slc6a3;Dclk1;Slc29a2;Efna1;Egr2;Esr2;Fbn2;Fer;Fxn;Gja1;Bscl2;Foxf1;Hmox1;Icam5;Igf2;Kcnj2;Kcnq1;Llgl1;Lrp1;Hook2;Matn2;Nedd9;Nrxn1;P2ry2;Psap;Pex19;S100a1;Scin;Exoc4;Sema3a;Slc19a1;Slc2a4;Snap25;Creb3l2;Aurkb;Dtx3l;Satb2;Tap1;Ccdc186;Wrap53;Stxbp6;Spata13;Tnfrsf1a;Trp53;Tsc2;Tulp3;Trpv2;Wnt3;Traf7;Onecut2;Snx32;Pigu…
8			3.61	GO:0008104	protein localization	Any process in which a protein is transported to, or maintained in, a specific location.	2.34% (61/2605)	0.00252877	2.6	103743;11539;11640;11768;12121;12286;12389;13033;14652;14800;16847;170833;17309;17872;18483;192662;19285;193385;20320;20614;209011;209630;213696;213990;216853;217069;217893;224624;227738;230972;260302;268396;268860;27057;30059;319504;332110;333433;54122;54563;56079;56089;56183;56698;64009;65945;66696;66795;69241;70361;71943;71982;72825;74325;74479;74718;74735;76687;76932;77531;80297	Tmem98;Adora1;Akap1;Ap1m2;Bicd1;Cacna1a;Cav1;Ctsd;Glp1r;Gria2;Lepr;Hook2;Mgat3;Ppp1r15a;Palm;Arhgdia;Cavin1;Ripor2;Nptn;Snap25;Sirt7;Frmd4a;Duoxa1;Agap3;Wrap53;Trim25;Pacs2;Rab40c;Lrsam1;Arhgef16;Gga3;Sh3pxd2b;Abat;Ncoa4;Timm10;Nrcam;Mapk15;Gpd1l;Uevld;Nup210;Astn2;Ramp3;Nmu;Phax;Syne1;Clstn1;Snx31;Atg10;Polr2d;Lman1;Tom1l1;Snx10;Mon1a;Cltb;Snx11;Snx16;Trim14;Spcs3;Arfip2;Anks1b;Sptbn4	2.84% (74/2605)	0.000847676	3.07	104156;107829;11778;11785;12028;13033;13175;13654;14119;14609;16535;16897;16971;170833;18189;19156;19298;20259;20336;20614;20877;209200;21354;213993;216853;21937;22059;22084;22158;224619;225861;228812;229593;233405;252903;268860;269338;27403;27883;29867;30059;320051;52163;54122;55943;56358;56399;56447;57743;57915;66053;66069;66397;66437;67767;67844;67894;68067;68151;68428;69660;69726;69773;69940;…	Etv5;Thoc5;Ap3s2;Apbb1;Bax;Ctsd;Dclk1;Egr2;Fbn2;Gja1;Kcnq1;Llgl1;Lrp1;Hook2;Nrxn1;Psap;Pex19;Scin;Exoc4;Snap25;Aurkb;Dtx3l;Tap1;Ccdc186;Wrap53;Tnfrsf1a;Trp53;Tsc2;Tulp3;Traf7;Snx32;Pigu;Golph3l;Vps33b;Ap1s3;Abat;Vps39;Abca7;Tango2;Cabp1;Timm10;Exph5;Camk1;Uevld;Stx8;Copz2;Akap8;Copz1;Sec61a2;Tbc1d1;Ppil2;Snupn;Sar1b;Fis1;Jagn1;Rab32;Dennd10;Mrnip;Wls;Steap3;Tmbim1;Smyd3;Timm29;Exoc1;Fuz;Vps11;Tmc…
8			5.87	GO:0071692	protein localization to extracellular region	Any process in which a protein is transported from one specific location in the extracellular region to another, or maintained in a specific extracellular location.	1.73% (7/404)	0.49259	0.31	NA	NA	4.46% (18/404)	0.00123989	2.91	11785;14119;14609;16535;16897;16971;18189;19156;213993;229593;268860;27883;320051;67767;68151;68428;69940;77371	Apbb1;Fbn2;Gja1;Kcnq1;Llgl1;Lrp1;Nrxn1;Psap;Ccdc186;Golph3l;Abat;Tango2;Exph5;Jagn1;Wls;Steap3;Exoc1;Sec24a
8			5.89	GO:0035592	establishment of protein localization to extracellular region	The directed movement of a protein to a specific location within the extracellular region.	1.76% (7/398)	0.47694	0.32	NA	NA	4.27% (17/398)	0.0025997	2.59	11785;14609;16535;16897;16971;18189;19156;213993;229593;268860;27883;320051;67767;68151;68428;69940;77371	Apbb1;Gja1;Kcnq1;Llgl1;Lrp1;Nrxn1;Psap;Ccdc186;Golph3l;Abat;Tango2;Exph5;Jagn1;Wls;Steap3;Exoc1;Sec24a
8			4.11	GO:0045184	establishment of protein localization	The directed movement of a protein to a specific location.	2.31% (41/1775)	0.0160567	1.79	NA	NA	3.32% (59/1775)	5.85421e-05	4.23	107829;11778;11785;12028;13033;13654;14609;16535;16897;16971;170833;18189;19156;19298;20336;20614;209200;21354;213993;216853;21937;22059;22084;225861;229593;233405;252903;268860;269338;27883;29867;30059;320051;52163;54122;55943;56358;56399;56447;57743;66069;66397;66437;67767;67844;67894;68151;68428;69726;69773;69940;70300;71732;71983;73288;77371;80981;80982;81905	Thoc5;Ap3s2;Apbb1;Bax;Ctsd;Egr2;Gja1;Kcnq1;Llgl1;Lrp1;Hook2;Nrxn1;Psap;Pex19;Exoc4;Snap25;Dtx3l;Tap1;Ccdc186;Wrap53;Tnfrsf1a;Trp53;Tsc2;Snx32;Golph3l;Vps33b;Ap1s3;Abat;Vps39;Tango2;Cabp1;Timm10;Exph5;Camk1;Uevld;Stx8;Copz2;Akap8;Copz1;Sec61a2;Snupn;Sar1b;Fis1;Jagn1;Rab32;Dennd10;Wls;Steap3;Smyd3;Timm29;Exoc1;Fuz;Vps11;Tmco6;Vps50;Sec24a;Arl4d;Cemip;Cacng8
8			5.47	GO:0070201	regulation of establishment of protein localization	Any process that modulates the frequency, rate or extent of the directed movement of a protein to a specific location.	1.64% (10/609)	0.540504	0.27	NA	NA	3.94% (24/609)	0.00115804	2.94	107829;11785;13033;14609;16535;16897;16971;18189;20336;20614;216853;21937;229593;268860;29867;320051;52163;66397;66437;67767;68151;69940;77371;80982	Thoc5;Apbb1;Ctsd;Gja1;Kcnq1;Llgl1;Lrp1;Nrxn1;Exoc4;Snap25;Wrap53;Tnfrsf1a;Golph3l;Abat;Cabp1;Exph5;Camk1;Sar1b;Fis1;Jagn1;Wls;Exoc1;Sec24a;Cemip
8			6.14	GO:1904951	positive regulation of establishment of protein localization	NA	1.78% (6/337)	0.475033	0.32	NA	NA	4.45% (15/337)	0.00309713	2.51	11785;14609;16971;216853;21937;229593;268860;320051;52163;66397;66437;68151;69940;77371;80982	Apbb1;Gja1;Lrp1;Wrap53;Tnfrsf1a;Golph3l;Abat;Exph5;Camk1;Sar1b;Fis1;Wls;Exoc1;Sec24a;Cemip
8			3.32	GO:0032879	regulation of localization	Any process that modulates the frequency, rate or extent of any process in which a cell, a substance, or a cellular entity is transported to, or maintained in, a specific location.	2.45% (72/2944)	0.000284456	3.55	103743;107589;11433;11539;11555;11640;11938;11977;12121;12286;12333;12389;12394;12683;12724;13033;13867;14130;14199;14270;14343;14652;14683;16002;16440;16772;16847;170738;17309;17311;18091;18260;18845;192662;192775;19285;193385;19735;20319;20320;20355;20614;209011;209630;20971;20979;216853;217069;227358;227738;230972;234515;268860;332110;333433;52538;56079;56089;56177;56183;64051;66922;67112;6853…	Tmem98;Mylk;Acp5;Adora1;Adrb2;Akap1;Atp2a2;Atp7a;Bicd1;Cacna1a;Capn1;Cav1;Runx1;Cidea;Clcn2;Ctsd;Erbb3;Fcgr2b;Fhl1;Srgap2;Fut1;Glp1r;Gnas;Igf2;Itpr3;Lama1;Lepr;Kcnh7;Mgat3;Kitl;Nkx2-5;Ocln;Plxna2;Arhgdia;Kcnh6;Cavin1;Ripor2;Rgs2;Sfrp2;Nptn;Sema4f;Snap25;Sirt7;Frmd4a;Sdc4;Syt1;Wrap53;Trim25;Erfe;Lrsam1;Arhgef16;Inpp4b;Abat;Mapk15;Gpd1l;Acaa2;Astn2;Ramp3;Olfm1;Nmu;Sv2a;Rras2;Fgf22;Tmem109;Zfp580;Cp…	2.58% (76/2944)	0.0086322	2.06	100502698;107829;109270;11785;12028;13033;13175;13636;14119;14158;14609;15227;15368;16002;16518;16535;16897;16971;18003;18189;18442;20193;20336;20346;20528;20614;20877;209200;216853;217517;219140;21937;22059;22084;22368;22415;224619;225631;229593;243362;244049;268860;27403;29867;320051;320924;329252;52163;53322;545622;55943;56530;57915;66102;66397;66437;67767;67894;68151;68539;68992;69550;69660;6…	Rubcn;Thoc5;Prr5;Apbb1;Bax;Ctsd;Dclk1;Efna1;Fbn2;Fer;Gja1;Foxf1;Hmox1;Igf2;Kcnj2;Kcnq1;Llgl1;Lrp1;Nedd9;Nrxn1;P2ry2;S100a1;Exoc4;Sema3a;Slc2a4;Snap25;Aurkb;Dtx3l;Wrap53;Stxbp6;Spata13;Tnfrsf1a;Trp53;Tsc2;Trpv2;Wnt3;Traf7;Onecut2;Golph3l;Stard13;Mctp2;Abat;Abca7;Cabp1;Exph5;Ccbe1;Lgr6;Camk1;Nucb2;Ptpn3;Stx8;Cnpy2;Tbc1d1;Cxcl16;Sar1b;Fis1;Jagn1;Dennd10;Wls;Tmem109;Zfp580;Bst2;Tmbim1;Exoc1;Fuz;Cpne3…
8			4.93	GO:0032880	regulation of protein localization	Any process that modulates the frequency, rate or extent of any process in which a protein is transported to, or maintained in, a specific location.	2.28% (22/963)	0.0732242	1.14	NA	NA	3.32% (32/963)	0.00307188	2.51	107829;11785;13033;13175;14609;16535;16897;16971;18189;20336;20614;209200;216853;21937;224619;229593;268860;27403;29867;320051;52163;55943;57915;66397;66437;67767;68151;69660;69940;77371;80982;83815	Thoc5;Apbb1;Ctsd;Dclk1;Gja1;Kcnq1;Llgl1;Lrp1;Nrxn1;Exoc4;Snap25;Dtx3l;Wrap53;Tnfrsf1a;Traf7;Golph3l;Abat;Abca7;Cabp1;Exph5;Camk1;Stx8;Tbc1d1;Sar1b;Fis1;Jagn1;Wls;Tmbim1;Exoc1;Sec24a;Cemip;Cenpq
8			8.42	GO:0086011	membrane repolarization during action potential	The process in which ions are transported across a membrane such that the membrane potential changes in the direction from the positive membrane potential at the peak of the action potential towards the negative resting potential.	14.29% (3/21)	0.00464545	2.33	12389;170738;192775	Cav1;Kcnh7;Kcnh6	9.52% (2/21)	0.0639663	1.19	NA	NA
8			8.11	GO:0010765	positive regulation of sodium ion transport	Any process that increases the frequency, rate or extent of the directed movement of sodium ions (Na+) into, out of or within a cell, or between cells, by means of some agent such as a transporter or pore.	9.3% (4/43)	0.00526623	2.28	11555;14683;18091;333433	Adrb2;Gnas;Nkx2-5;Gpd1l	0% (0/43)	1	0	NA	NA
8			4.81	GO:0043269	regulation of ion transport	Any process that modulates the frequency, rate or extent of the directed movement of charged atoms or small charged molecules into, out of or within a cell, or between cells, by means of some agent such as a transporter or pore.	2.97% (23/774)	0.00457491	2.34	107589;11539;11555;11977;12286;12389;12724;14199;14652;14683;170738;18091;192775;19735;20979;227358;268860;333433;56089;64051;68539;80297;80708	Mylk;Adora1;Adrb2;Atp7a;Cacna1a;Cav1;Clcn2;Fhl1;Glp1r;Gnas;Kcnh7;Nkx2-5;Kcnh6;Rgs2;Syt1;Erfe;Abat;Gpd1l;Ramp3;Sv2a;Tmem109;Sptbn4;Pacsin3	2.2% (17/774)	0.363268	0.44	NA	NA
8			5.91	GO:0043270	positive regulation of ion transport	Any process that activates or increases the frequency, rate or extent of the directed movement of charged atoms or small charged molecules into, out of or within a cell, or between cells, by means of some agent such as a transporter or pore.	3.74% (13/348)	0.00509634	2.29	107589;11539;11555;11977;12389;14199;14683;18091;20979;227358;268860;333433;56089	Mylk;Adora1;Adrb2;Atp7a;Cav1;Fhl1;Gnas;Nkx2-5;Syt1;Erfe;Abat;Gpd1l;Ramp3	2.87% (10/348)	0.153864	0.81	NA	NA
9		Homeostatic process	5.19	GO:0072507	divalent inorganic cation homeostasis	Any process involved in the maintenance of an internal steady state of divalent cations within an organism or cell.	3.78% (21/556)	0.000365993	3.44	102443351;11555;11938;12286;12307;12389;14652;14683;14718;16440;20320;217893;22067;234515;56089;56183;57265;64051;65945;71982;74769	Xntrpc;Adrb2;Atp2a2;Cacna1a;Calb1;Cav1;Glp1r;Gnas;Got1;Itpr3;Nptn;Pacs2;Trpc5;Inpp4b;Ramp3;Nmu;Fzd2;Sv2a;Clstn1;Snx10;Pik3cb	1.8% (10/556)	0.663549	0.18	NA	NA
9			4.91	GO:0055065	metal ion homeostasis	Any process involved in the maintenance of an internal steady state of metal ions within an organism or cell.	3.79% (27/713)	5.22027e-05	4.28	102443351;11428;11539;11555;11938;11977;12286;12307;12389;14652;14683;14718;16440;20320;217893;22067;227358;234515;27057;56089;56183;57265;64051;65945;71982;72825;74769	Xntrpc;Aco1;Adora1;Adrb2;Atp2a2;Atp7a;Cacna1a;Calb1;Cav1;Glp1r;Gnas;Got1;Itpr3;Nptn;Pacs2;Trpc5;Erfe;Inpp4b;Ncoa4;Ramp3;Nmu;Fzd2;Sv2a;Clstn1;Snx10;Mon1a;Pik3cb	2.24% (16/713)	0.33782	0.47	NA	NA
9			5.27	GO:0055074	calcium ion homeostasis	Any process involved in the maintenance of an internal steady state of calcium ions within an organism or cell.	4.03% (21/521)	0.00015296	3.82	102443351;11555;11938;12286;12307;12389;14652;14683;14718;16440;20320;217893;22067;234515;56089;56183;57265;64051;65945;71982;74769	Xntrpc;Adrb2;Atp2a2;Cacna1a;Calb1;Cav1;Glp1r;Gnas;Got1;Itpr3;Nptn;Pacs2;Trpc5;Inpp4b;Ramp3;Nmu;Fzd2;Sv2a;Clstn1;Snx10;Pik3cb	1.92% (10/521)	0.582473	0.23	NA	NA
9			9.37	GO:0055089	fatty acid homeostasis	Any process involved in the maintenance of an internal steady state of fatty acid within an organism or cell.	20% (3/15)	0.00170898	2.77	11539;14718;58805	Adora1;Got1;Mlxipl	0% (0/15)	1	0	NA	NA
9			3.8	GO:0042592	homeostatic process	Any biological process involved in the maintenance of an internal steady state.	2.58% (53/2054)	0.000609873	3.21	102443351;11428;11433;11474;11539;11555;11938;11977;12286;12307;12389;12683;14130;14199;14652;14683;14718;15511;16440;16470;16847;170439;17311;18260;20320;214133;216853;217011;217893;22067;227358;229512;234515;235283;268860;27057;27273;332110;333433;56089;56183;57265;58805;64051;65945;65970;68837;71982;72825;74443;74769;75124;76459	Xntrpc;Aco1;Acp5;Actn3;Adora1;Adrb2;Atp2a2;Atp7a;Cacna1a;Calb1;Cav1;Cidea;Fcgr2b;Fhl1;Glp1r;Gnas;Got1;Hspa1b;Itpr3;Ush1g;Lepr;Elovl6;Kitl;Ocln;Nptn;Tet2;Wrap53;Nle1;Pacs2;Trpc5;Erfe;Smg5;Inpp4b;Gramd1b;Abat;Ncoa4;Pdk4;Mapk15;Gpd1l;Ramp3;Nmu;Fzd2;Mlxipl;Sv2a;Clstn1;Lima1;Foxk2;Snx10;Mon1a;P4htm;Pik3cb;Nxnl2;Car12	2.29% (47/2054)	0.163365	0.79	NA	NA
9			4.29	GO:0048878	chemical homeostasis	Any biological process involved in the maintenance of an internal steady state of a chemical.	2.78% (36/1297)	0.00142392	2.85	102443351;11428;11539;11555;11938;11977;12286;12307;12389;14199;14652;14683;14718;16440;16847;20320;217893;22067;227358;234515;235283;27057;27273;333433;56089;56183;57265;58805;64051;65945;65970;68837;71982;72825;74769;76459	Xntrpc;Aco1;Adora1;Adrb2;Atp2a2;Atp7a;Cacna1a;Calb1;Cav1;Fhl1;Glp1r;Gnas;Got1;Itpr3;Lepr;Nptn;Pacs2;Trpc5;Erfe;Inpp4b;Gramd1b;Ncoa4;Pdk4;Gpd1l;Ramp3;Nmu;Fzd2;Mlxipl;Sv2a;Clstn1;Lima1;Foxk2;Snx10;Mon1a;Pik3cb;Car12	2.47% (32/1297)	0.116472	0.93	NA	NA
9			4.76	GO:0098771	inorganic ion homeostasis	Any process involved in the maintenance of an internal steady state of inorganic ions within an organism or cell.	3.63% (29/799)	5.87337e-05	4.23	102443351;11428;11539;11555;11938;11977;12286;12307;12389;14652;14683;14718;16440;20320;217893;22067;227358;234515;27057;27273;56089;56183;57265;64051;65945;71982;72825;74769;76459	Xntrpc;Aco1;Adora1;Adrb2;Atp2a2;Atp7a;Cacna1a;Calb1;Cav1;Glp1r;Gnas;Got1;Itpr3;Nptn;Pacs2;Trpc5;Erfe;Inpp4b;Ncoa4;Pdk4;Ramp3;Nmu;Fzd2;Sv2a;Clstn1;Snx10;Mon1a;Pik3cb;Car12	2.13% (17/799)	0.413279	0.38	NA	NA
9			4.67	GO:0050801	ion homeostasis	Any process involved in the maintenance of an internal steady state of ions within an organism or cell.	3.66% (32/874)	2.04281e-05	4.69	102443351;11428;11539;11555;11938;11977;12286;12307;12389;14199;14652;14683;14718;16440;20320;217893;22067;227358;234515;27057;27273;333433;56089;56183;57265;58805;64051;65945;71982;72825;74769;76459	Xntrpc;Aco1;Adora1;Adrb2;Atp2a2;Atp7a;Cacna1a;Calb1;Cav1;Fhl1;Glp1r;Gnas;Got1;Itpr3;Nptn;Pacs2;Trpc5;Erfe;Inpp4b;Ncoa4;Pdk4;Gpd1l;Ramp3;Nmu;Fzd2;Mlxipl;Sv2a;Clstn1;Snx10;Mon1a;Pik3cb;Car12	2.29% (20/874)	0.282415	0.55	NA	NA
9			4.8	GO:0055080	cation homeostasis	Any process involved in the maintenance of an internal steady state of cations within an organism or cell.	3.67% (29/790)	4.80691e-05	4.32	102443351;11428;11539;11555;11938;11977;12286;12307;12389;14652;14683;14718;16440;20320;217893;22067;227358;234515;27057;27273;56089;56183;57265;64051;65945;71982;72825;74769;76459	Xntrpc;Aco1;Adora1;Adrb2;Atp2a2;Atp7a;Cacna1a;Calb1;Cav1;Glp1r;Gnas;Got1;Itpr3;Nptn;Pacs2;Trpc5;Erfe;Inpp4b;Ncoa4;Pdk4;Ramp3;Nmu;Fzd2;Sv2a;Clstn1;Snx10;Mon1a;Pik3cb;Car12	2.15% (17/790)	0.395185	0.4	NA	NA
9			8.47	GO:0045454	cell redox homeostasis	Any process that maintains the redox environment of a cell or compartment within a cell.	0% (0/31)	1	0	NA	NA	16.13% (5/31)	0.000328346	3.48	11757;11758;21672;26462;50493	Prdx3;Prdx6;Prdx2;Txnrd2;Txnrd1
9			4.71	GO:0019725	cellular homeostasis	Any process involved in the maintenance of an internal steady state at the level of the cell.	2.78% (27/971)	0.00537665	2.27	102443351;11428;11555;11938;11977;12286;12307;12389;14652;14718;16440;16847;20320;217893;22067;227358;234515;27057;56089;56183;57265;58805;64051;65945;68837;72825;74769	Xntrpc;Aco1;Adrb2;Atp2a2;Atp7a;Cacna1a;Calb1;Cav1;Glp1r;Got1;Itpr3;Lepr;Nptn;Pacs2;Trpc5;Erfe;Inpp4b;Ncoa4;Ramp3;Nmu;Fzd2;Mlxipl;Sv2a;Clstn1;Foxk2;Mon1a;Pik3cb	2.57% (25/971)	0.108577	0.96	NA	NA
9			4.8	GO:0055082	cellular chemical homeostasis	Any biological process involved in the maintenance of an internal steady state of a chemical at the level of the cell.	3.09% (27/873)	0.00125155	2.9	102443351;11428;11555;11938;11977;12286;12307;12389;14652;14718;16440;16847;20320;217893;22067;227358;234515;27057;56089;56183;57265;58805;64051;65945;68837;72825;74769	Xntrpc;Aco1;Adrb2;Atp2a2;Atp7a;Cacna1a;Calb1;Cav1;Glp1r;Got1;Itpr3;Lepr;Nptn;Pacs2;Trpc5;Erfe;Inpp4b;Ncoa4;Ramp3;Nmu;Fzd2;Mlxipl;Sv2a;Clstn1;Foxk2;Mon1a;Pik3cb	2.06% (18/873)	0.461693	0.34	NA	NA
9			4.97	GO:0006873	cellular ion homeostasis	Any process involved in the maintenance of an internal steady state of ions at the level of a cell.	3.39% (24/708)	0.000674856	3.17	102443351;11428;11555;11938;11977;12286;12307;12389;14652;14718;16440;20320;217893;22067;227358;234515;27057;56089;56183;57265;64051;65945;72825;74769	Xntrpc;Aco1;Adrb2;Atp2a2;Atp7a;Cacna1a;Calb1;Cav1;Glp1r;Got1;Itpr3;Nptn;Pacs2;Trpc5;Erfe;Inpp4b;Ncoa4;Ramp3;Nmu;Fzd2;Sv2a;Clstn1;Mon1a;Pik3cb	1.98% (14/708)	0.538045	0.27	NA	NA
9			5	GO:0030003	cellular cation homeostasis	Any process involved in the maintenance of an internal steady state of cations at the level of a cell.	3.47% (24/692)	0.000489974	3.31	102443351;11428;11555;11938;11977;12286;12307;12389;14652;14718;16440;20320;217893;22067;227358;234515;27057;56089;56183;57265;64051;65945;72825;74769	Xntrpc;Aco1;Adrb2;Atp2a2;Atp7a;Cacna1a;Calb1;Cav1;Glp1r;Got1;Itpr3;Nptn;Pacs2;Trpc5;Erfe;Inpp4b;Ncoa4;Ramp3;Nmu;Fzd2;Sv2a;Clstn1;Mon1a;Pik3cb	1.88% (13/692)	0.613913	0.21	NA	NA
9			5.27	GO:0072503	cellular divalent inorganic cation homeostasis	Any process involved in the maintenance of an internal steady state of divalent cations at the level of a cell.	3.64% (19/522)	0.00106595	2.97	102443351;11555;11938;12286;12307;12389;14652;14718;16440;20320;217893;22067;234515;56089;56183;57265;64051;65945;74769	Xntrpc;Adrb2;Atp2a2;Cacna1a;Calb1;Cav1;Glp1r;Got1;Itpr3;Nptn;Pacs2;Trpc5;Inpp4b;Ramp3;Nmu;Fzd2;Sv2a;Clstn1;Pik3cb	1.72% (9/522)	0.707368	0.15	NA	NA
9			5.34	GO:0006874	cellular calcium ion homeostasis	Any process involved in the maintenance of an internal steady state of calcium ions at the level of a cell.	3.85% (19/494)	0.000554756	3.26	102443351;11555;11938;12286;12307;12389;14652;14718;16440;20320;217893;22067;234515;56089;56183;57265;64051;65945;74769	Xntrpc;Adrb2;Atp2a2;Cacna1a;Calb1;Cav1;Glp1r;Got1;Itpr3;Nptn;Pacs2;Trpc5;Inpp4b;Ramp3;Nmu;Fzd2;Sv2a;Clstn1;Pik3cb	1.82% (9/494)	0.644697	0.19	NA	NA
9			5.09	GO:0006875	cellular metal ion homeostasis	Any process involved in the maintenance of an internal steady state of metal ions at the level of a cell.	3.84% (24/625)	0.000110217	3.96	102443351;11428;11555;11938;11977;12286;12307;12389;14652;14718;16440;20320;217893;22067;227358;234515;27057;56089;56183;57265;64051;65945;72825;74769	Xntrpc;Aco1;Adrb2;Atp2a2;Atp7a;Cacna1a;Calb1;Cav1;Glp1r;Got1;Itpr3;Nptn;Pacs2;Trpc5;Erfe;Inpp4b;Ncoa4;Ramp3;Nmu;Fzd2;Sv2a;Clstn1;Mon1a;Pik3cb	1.92% (12/625)	0.582141	0.23	NA	NA
10		Cellular component organization or biogenesis	4.82	GO:0048858	cell projection morphogenesis	The process in which the anatomical structures of a cell projection are generated and organized.	3.41% (25/734)	0.000489119	3.31	110596;11658;11977;12286;12305;14270;14587;16772;17181;18028;18845;19266;20320;20355;20979;22067;244281;26901;27279;319504;338362;56177;73710;77097;80297	Arhgef28;Alcam;Atp7a;Cacna1a;Ddr1;Srgap2;Gfra3;Lama1;Matn2;Nfib;Plxna2;Ptprd;Nptn;Sema4f;Syt1;Trpc5;Myo16;Ss18l2;Tnfrsf12a;Nrcam;Ust;Olfm1;Tubb2b;Tanc2;Sptbn4	3% (22/734)	0.0358383	1.45	NA	NA
10			4.83	GO:0120039	plasma membrane bounded cell projection morphogenesis	The process in which the anatomical structures of a plasma membrane bounded cell projection are generated and organized.	3.43% (25/729)	0.000442833	3.35	110596;11658;11977;12286;12305;14270;14587;16772;17181;18028;18845;19266;20320;20355;20979;22067;244281;26901;27279;319504;338362;56177;73710;77097;80297	Arhgef28;Alcam;Atp7a;Cacna1a;Ddr1;Srgap2;Gfra3;Lama1;Matn2;Nfib;Plxna2;Ptprd;Nptn;Sema4f;Syt1;Trpc5;Myo16;Ss18l2;Tnfrsf12a;Nrcam;Ust;Olfm1;Tubb2b;Tanc2;Sptbn4	3.02% (22/729)	0.0336312	1.47	NA	NA
10			8.74	GO:0070584	mitochondrion morphogenesis	The process in which the anatomical structures of a mitochondrion are generated and organized.	0% (0/27)	1	0	NA	NA	14.81% (4/27)	0.00184474	2.73	12028;12850;66437;71701	Bax;Coq7;Fis1;Pnpt1
10			4.69	GO:0032989	cellular component morphogenesis	The process in which cellular structures, including whole cells or cell parts, are generated and organized.	3.04% (26/854)	0.00190542	2.72	110596;11658;11977;12286;12305;14270;14587;16772;17181;18028;18091;18845;19266;20320;20355;20979;22067;244281;26901;27279;319504;338362;56177;73710;77097;80297	Arhgef28;Alcam;Atp7a;Cacna1a;Ddr1;Srgap2;Gfra3;Lama1;Matn2;Nfib;Nkx2-5;Plxna2;Ptprd;Nptn;Sema4f;Syt1;Trpc5;Myo16;Ss18l2;Tnfrsf12a;Nrcam;Ust;Olfm1;Tubb2b;Tanc2;Sptbn4	3.04% (26/854)	0.0201976	1.69	NA	NA
10			4.8	GO:0032990	cell part morphogenesis	The process in which the anatomical structures of a cell part are generated and organized.	3.3% (25/757)	0.00076112	3.12	110596;11658;11977;12286;12305;14270;14587;16772;17181;18028;18845;19266;20320;20355;20979;22067;244281;26901;27279;319504;338362;56177;73710;77097;80297	Arhgef28;Alcam;Atp7a;Cacna1a;Ddr1;Srgap2;Gfra3;Lama1;Matn2;Nfib;Plxna2;Ptprd;Nptn;Sema4f;Syt1;Trpc5;Myo16;Ss18l2;Tnfrsf12a;Nrcam;Ust;Olfm1;Tubb2b;Tanc2;Sptbn4	3.43% (26/757)	0.0048008	2.32	11302;11785;11921;12028;12850;13175;13636;13654;14297;14609;16897;16971;17181;18424;19415;20346;20429;22084;22368;22415;226251;23954;244281;270190;66437;71701	Aatk;Apbb1;Atoh1;Bax;Coq7;Dclk1;Efna1;Egr2;Fxn;Gja1;Llgl1;Lrp1;Matn2;Otx2;Rasal1;Sema3a;Shox2;Tsc2;Trpv2;Wnt3;Ablim1;Nek3;Myo16;Ephb1;Fis1;Pnpt1
10			6.86	GO:0008637	apoptotic mitochondrial changes	The morphological and physiological alterations undergone by mitochondria during apoptosis.	2.54% (3/118)	0.304457	0.52	NA	NA	6.78% (8/118)	0.00241546	2.62	12028;12050;12124;14297;22059;23922;66437;74919	Bax;Bcl2l2;Bik;Fxn;Trp53;Jtb;Fis1;Slc35f6
10			7.56	GO:0001836	release of cytochrome c from mitochondria	The process that results in the movement of cytochrome c from the mitochondrial intermembrane space into the cytosol, which is part of the apoptotic signaling pathway and leads to caspase activation.	1.54% (1/65)	0.658385	0.18	NA	NA	9.23% (6/65)	0.00178212	2.75	12028;12050;12124;14297;22059;66437	Bax;Bcl2l2;Bik;Fxn;Trp53;Fis1
10			8.01	GO:0090199	regulation of release of cytochrome c from mitochondria	Any process that modulates the rate, frequency or extent of release of cytochrome c from mitochondria, the process in which cytochrome c is enabled to move from the mitochondrial intermembrane space into the cytosol, which is an early step in apoptosis and leads to caspase activation.	0% (0/52)	1	0	NA	NA	9.62% (5/52)	0.00357773	2.45	12028;12050;12124;14297;22059	Bax;Bcl2l2;Bik;Fxn;Trp53
10			8.67	GO:0090169	regulation of spindle assembly	Any process that modulates the rate, frequency or extent of spindle assembly. Spindle assembly is the aggregation, arrangement and bonding together of a set of components to form the spindle, the array of microtubules and associated molecules that serves to move duplicated chromosomes apart.	11.54% (3/26)	0.00855029	2.07	15511;193385;332110	Hspa1b;Ripor2;Mapk15	0% (0/26)	1	0	NA	NA
10			7.88	GO:0010823	negative regulation of mitochondrion organization	Any process that decreases the frequency, rate or extent of a process involved in the formation, arrangement of constituent parts, or disassembly of a mitochondrion.	3.45% (2/58)	0.245358	0.61	NA	NA	8.62% (5/58)	0.00572906	2.24	12050;14297;22059;72113;74919	Bcl2l2;Fxn;Trp53;Adck1;Slc35f6
10			4.92	GO:0031344	regulation of cell projection organization	Any process that modulates the frequency, rate or extent of a process involved in the formation, arrangement of constituent parts, or disassembly of cell projections.	3.18% (26/817)	0.00102572	2.99	11977;12286;12389;14130;18483;18845;19266;193385;19735;20319;20320;20355;20614;20979;22067;26901;27279;319504;332110;338362;56177;622408;64009;73710;76441;77097	Atp7a;Cacna1a;Cav1;Fcgr2b;Palm;Plxna2;Ptprd;Ripor2;Rgs2;Sfrp2;Nptn;Sema4f;Snap25;Syt1;Trpc5;Ss18l2;Tnfrsf12a;Nrcam;Mapk15;Ust;Olfm1;Mcidas;Syne1;Tubb2b;Daam2;Tanc2	2.69% (22/817)	0.0897757	1.05	NA	NA
10			4.94	GO:0120035	regulation of plasma membrane bounded cell projection organization	Any process that modulates the frequency, rate or extent of a process involved in the formation, arrangement of constituent parts, or disassembly of plasma membrane bounded cell projections.	3.22% (26/808)	0.000875182	3.06	11977;12286;12389;14130;18483;18845;19266;193385;19735;20319;20320;20355;20614;20979;22067;26901;27279;319504;332110;338362;56177;622408;64009;73710;76441;77097	Atp7a;Cacna1a;Cav1;Fcgr2b;Palm;Plxna2;Ptprd;Ripor2;Rgs2;Sfrp2;Nptn;Sema4f;Snap25;Syt1;Trpc5;Ss18l2;Tnfrsf12a;Nrcam;Mapk15;Ust;Olfm1;Mcidas;Syne1;Tubb2b;Daam2;Tanc2	2.72% (22/808)	0.0822113	1.09	NA	NA
10			7.53	GO:0046847	filopodium assembly	The assembly of a filopodium, a thin, stiff protrusion extended by the leading edge of a motile cell such as a crawling fibroblast or amoeba, or an axonal growth cone.	6.58% (5/76)	0.00817386	2.09	14270;18483;193385;70997;76441	Srgap2;Palm;Ripor2;Spef1;Daam2	5.26% (4/76)	0.0637629	1.2	NA	NA
10			3.85	GO:0030030	cell projection organization	A process that is carried out at the cellular level which results in the assembly, arrangement of constituent parts, or disassembly of a prolongation or process extending from a cell, e.g. a flagellum or axon.	2.72% (46/1691)	0.000478469	3.32	100101919;107589;110596;11658;11977;12286;12305;12389;14130;14270;14587;16470;16772;17181;18028;18483;18845;19266;193385;19735;20319;20320;20355;20416;20614;20971;20979;211535;22067;244281;26901;27279;319504;329628;332110;338362;56177;622408;64009;65970;70997;71982;73710;76441;77097;80297	Dnah7c;Mylk;Arhgef28;Alcam;Atp7a;Cacna1a;Ddr1;Cav1;Fcgr2b;Srgap2;Gfra3;Ush1g;Lama1;Matn2;Nfib;Palm;Plxna2;Ptprd;Ripor2;Rgs2;Sfrp2;Nptn;Sema4f;Shc1;Snap25;Sdc4;Syt1;Odad1;Trpc5;Myo16;Ss18l2;Tnfrsf12a;Nrcam;Fat4;Mapk15;Ust;Olfm1;Mcidas;Syne1;Lima1;Spef1;Snx10;Tubb2b;Daam2;Tanc2;Sptbn4	2.66% (45/1691)	0.0258644	1.59	NA	NA
10			3.92	GO:0120036	plasma membrane bounded cell projection organization	A process that is carried out at the cellular level which results in the assembly, arrangement of constituent parts, or disassembly of a plasma membrane bounded prolongation or process extending from a cell, e.g. a cilium or axon.	2.8% (46/1645)	0.000262182	3.58	100101919;107589;110596;11658;11977;12286;12305;12389;14130;14270;14587;16470;16772;17181;18028;18483;18845;19266;193385;19735;20319;20320;20355;20416;20614;20971;20979;211535;22067;244281;26901;27279;319504;329628;332110;338362;56177;622408;64009;65970;70997;71982;73710;76441;77097;80297	Dnah7c;Mylk;Arhgef28;Alcam;Atp7a;Cacna1a;Ddr1;Cav1;Fcgr2b;Srgap2;Gfra3;Ush1g;Lama1;Matn2;Nfib;Palm;Plxna2;Ptprd;Ripor2;Rgs2;Sfrp2;Nptn;Sema4f;Shc1;Snap25;Sdc4;Syt1;Odad1;Trpc5;Myo16;Ss18l2;Tnfrsf12a;Nrcam;Fat4;Mapk15;Ust;Olfm1;Mcidas;Syne1;Lima1;Spef1;Snx10;Tubb2b;Daam2;Tanc2;Sptbn4	2.55% (42/1645)	0.053316	1.27	NA	NA
10			6.43	GO:0008361	regulation of cell size	Any process that modulates the size of a cell.	2.34% (5/214)	0.273709	0.56	NA	NA	5.14% (11/214)	0.00369728	2.43	107045;107723;11302;14297;16971;20346;22084;22368;22415;26889;83704	Lars;Slc12a6;Aatk;Fxn;Lrp1;Sema3a;Tsc2;Trpv2;Wnt3;Cln8;Slc12a9
10			5.64	GO:0032535	regulation of cellular component size	A process that modulates the size of a cellular component.	2.38% (10/420)	0.153209	0.81	NA	NA	3.81% (16/420)	0.00991405	2	104252;107045;107723;11302;14158;14297;16971;20259;20346;22084;22368;22415;26889;319262;76441;83704	Cdc42ep2;Lars;Slc12a6;Aatk;Fer;Fxn;Lrp1;Scin;Sema3a;Tsc2;Trpv2;Wnt3;Cln8;Fchsd1;Daam2;Slc12a9
10			7.05	GO:0007006	mitochondrial membrane organization	A process that is carried out at the cellular level which results in the assembly, arrangement of constituent parts, or disassembly of a mitochondrial membrane, either of the lipid bilayer surrounding a mitochondrion.	2.83% (3/106)	0.251198	0.6	NA	NA	7.55% (8/106)	0.00122146	2.91	12028;12050;22059;26889;30059;69773;72113;74919	Bax;Bcl2l2;Trp53;Cln8;Timm10;Timm29;Adck1;Slc35f6
10			8.29	GO:0007007	inner mitochondrial membrane organization	A process that is carried out at the cellular level which results in the assembly, arrangement of constituent parts, or disassembly of the mitochondrial inner membrane.	3.12% (1/32)	0.410442	0.39	NA	NA	12.5% (4/32)	0.00349728	2.46	12028;30059;69773;72113	Bax;Timm10;Timm29;Adck1
10			2.27	GO:0071840	cellular component organization or biogenesis	A process that results in the biosynthesis of constituent macromolecules, assembly, arrangement of constituent parts, or disassembly of a cellular component.	2.04% (131/6421)	0.00186379	2.73	100101919;100502841;105988;107581;107589;108958;110596;11474;11555;11568;11658;11938;11977;12121;12286;12305;12333;12389;12416;12642;12683;13033;14130;14199;14270;14587;14800;15356;15511;16002;16470;16716;16772;16865;170833;17181;17389;17872;18028;18091;18260;18483;18845;19041;192287;192652;19266;192662;193385;194952;19735;20319;20320;20355;20416;20614;20843;209011;20971;20979;211535;212712;21399…	Dnah7c;Epg5;Espl1;Col16a1;Mylk;Miga2;Arhgef28;Actn3;Adrb2;Aebp1;Alcam;Atp2a2;Atp7a;Bicd1;Cacna1a;Ddr1;Capn1;Cav1;Cbx2;Ch25h;Cidea;Ctsd;Fcgr2b;Fhl1;Srgap2;Gfra3;Gria2;Hmgcl;Hspa1b;Igf2;Ush1g;Ky;Lama1;Eif2d;Hook2;Matn2;Mmp16;Ppp1r15a;Nfib;Nkx2-5;Ocln;Palm;Plxna2;Ppl;Slc25a36;Wdr81;Ptprd;Arhgdia;Ripor2;Jmjd4;Rgs2;Sfrp2;Nptn;Sema4f;Shc1;Snap25;Stag2;Sirt7;Sdc4;Syt1;Odad1;Satb2;Agap3;Tcf4;Tet2;Adamts2…	2.43% (156/6421)	0.00147793	2.83	100502698;100502841;100900;101612;104156;104252;107045;107723;109270;11302;11474;11757;11758;11785;11921;12028;12050;12124;12367;12388;12642;12850;12972;13033;13175;13636;13654;14158;14297;14609;14705;14731;15227;15356;16002;16518;16535;16582;16865;16897;16971;170787;170833;170936;17181;18003;18103;18189;18424;18442;19156;19298;19415;20259;20336;20346;20429;20528;20614;208647;20877;209200;212712;…	Rubcn;Epg5;Hscb;Grwd1;Etv5;Cdc42ep2;Lars;Slc12a6;Prr5;Aatk;Actn3;Prdx3;Prdx6;Apbb1;Atoh1;Bax;Bcl2l2;Bik;Casp3;Ctnnd1;Ch25h;Coq7;Cryz;Ctsd;Dclk1;Efna1;Egr2;Fer;Fxn;Gja1;Bscl2;Gpaa1;Foxf1;Hmgcl;Igf2;Kcnj2;Kcnq1;Kifc3;Eif2d;Llgl1;Lrp1;Hdac10;Hook2;Zfp369;Matn2;Nedd9;Nme2;Nrxn1;Otx2;P2ry2;Psap;Pex19;Rasal1;Scin;Exoc4;Sema3a;Shox2;Slc2a4;Snap25;Creb3l2;Aurkb;Dtx3l;Satb2;Tcf4;Wrap53;Stxbp6;B4galt7;Spat…
10			2.31	GO:0016043	cellular component organization	A process that results in the assembly, arrangement of constituent parts, or disassembly of a cellular component.	2.05% (128/6237)	0.00172636	2.76	100101919;100502841;105988;107581;107589;108958;110596;11474;11555;11568;11658;11938;11977;12121;12286;12305;12333;12389;12416;12642;12683;13033;14130;14199;14270;14587;14800;15356;15511;16002;16470;16716;16772;16865;170833;17181;17389;17872;18028;18091;18260;18483;18845;19041;192287;192652;19266;192662;193385;194952;19735;20319;20320;20355;20416;20614;20843;209011;20971;20979;211535;212712;21399…	Dnah7c;Epg5;Espl1;Col16a1;Mylk;Miga2;Arhgef28;Actn3;Adrb2;Aebp1;Alcam;Atp2a2;Atp7a;Bicd1;Cacna1a;Ddr1;Capn1;Cav1;Cbx2;Ch25h;Cidea;Ctsd;Fcgr2b;Fhl1;Srgap2;Gfra3;Gria2;Hmgcl;Hspa1b;Igf2;Ush1g;Ky;Lama1;Eif2d;Hook2;Matn2;Mmp16;Ppp1r15a;Nfib;Nkx2-5;Ocln;Palm;Plxna2;Ppl;Slc25a36;Wdr81;Ptprd;Arhgdia;Ripor2;Jmjd4;Rgs2;Sfrp2;Nptn;Sema4f;Shc1;Snap25;Stag2;Sirt7;Sdc4;Syt1;Odad1;Satb2;Agap3;Tcf4;Tet2;Adamts2…	2.44% (152/6237)	0.0015456	2.81	100502698;100502841;100900;101612;104156;104252;107045;107723;109270;11302;11474;11757;11758;11785;11921;12028;12050;12124;12367;12388;12642;12850;12972;13033;13175;13636;13654;14158;14297;14609;14705;14731;15227;15356;16002;16518;16535;16582;16865;16897;16971;170787;170833;170936;17181;18003;18103;18189;18424;18442;19156;19298;19415;20259;20336;20346;20429;20528;20614;208647;20877;209200;212712;…	Rubcn;Epg5;Hscb;Grwd1;Etv5;Cdc42ep2;Lars;Slc12a6;Prr5;Aatk;Actn3;Prdx3;Prdx6;Apbb1;Atoh1;Bax;Bcl2l2;Bik;Casp3;Ctnnd1;Ch25h;Coq7;Cryz;Ctsd;Dclk1;Efna1;Egr2;Fer;Fxn;Gja1;Bscl2;Gpaa1;Foxf1;Hmgcl;Igf2;Kcnj2;Kcnq1;Kifc3;Eif2d;Llgl1;Lrp1;Hdac10;Hook2;Zfp369;Matn2;Nedd9;Nme2;Nrxn1;Otx2;P2ry2;Psap;Pex19;Rasal1;Scin;Exoc4;Sema3a;Shox2;Slc2a4;Snap25;Creb3l2;Aurkb;Dtx3l;Satb2;Tcf4;Wrap53;Stxbp6;B4galt7;Spat…
10			4.86	GO:0061024	membrane organization	A process which results in the assembly, arrangement of constituent parts, or disassembly of a membrane. A membrane is a double layer of lipid molecules that encloses all cells, and, in eukaryotes, many organelles; may be a single or double lipid bilayer; also includes associated proteins.	1.98% (17/860)	0.245781	0.61	NA	NA	3.6% (31/860)	0.0010239	2.99	104156;12028;12050;12642;18189;19156;20528;20614;20877;217517;22059;22084;229593;231287;233405;26889;269338;27403;30059;319262;55943;66397;66712;68385;69608;69773;71732;72113;74919;77371;80708	Etv5;Bax;Bcl2l2;Ch25h;Nrxn1;Psap;Slc2a4;Snap25;Aurkb;Stxbp6;Trp53;Tsc2;Golph3l;Atp10d;Vps33b;Cln8;Vps39;Abca7;Timm10;Fchsd1;Stx8;Sar1b;Spesp1;Tlcd1;Sec24d;Timm29;Vps11;Adck1;Slc35f6;Sec24a;Pacsin3
10			6.55	GO:0048284	organelle fusion	The creation of a single organelle from two or more organelles.	2.07% (3/145)	0.424317	0.37	NA	NA	5.52% (8/145)	0.00832426	2.08	12028;20614;217517;269338;55943;66437;71732;72113	Bax;Snap25;Stxbp6;Vps39;Stx8;Fis1;Vps11;Adck1
10			5.96	GO:0016050	vesicle organization	A process that is carried out at the cellular level which results in the assembly, arrangement of constituent parts, or disassembly of a vesicle.	2.46% (7/284)	0.185653	0.73	NA	NA	4.58% (13/284)	0.00451694	2.35	170833;20528;20614;217517;229593;233405;269338;55943;66397;67844;69608;71732;77371	Hook2;Slc2a4;Snap25;Stxbp6;Golph3l;Vps33b;Vps39;Stx8;Sar1b;Rab32;Sec24d;Vps11;Sec24a
10			2.89	GO:0006996	organelle organization	A process that is carried out at the cellular level which results in the assembly, arrangement of constituent parts, or disassembly of an organelle within a cell. An organelle is an organized structure of distinctive morphology and function. Includes the nucleus, mitochondria, plastids, vacuoles, vesicles, ribosomes and the cytoskeleton. Excludes the plasma membrane.	2.05% (79/3850)	0.0173264	1.76	NA	NA	2.52% (97/3850)	0.00582236	2.23	100502698;101612;104252;109270;11474;11757;11785;12028;12050;12124;12850;13033;14158;14297;14705;15356;16002;16535;16582;16865;16897;16971;170787;170833;170936;18003;18189;19298;20259;20528;20614;20877;209200;212712;216853;217517;22059;224619;225631;225887;225895;226251;229593;230674;232933;233405;233806;23922;243362;26889;269338;27367;27883;29856;30059;30938;319262;384619;408022;436062;50883;526…	Rubcn;Grwd1;Cdc42ep2;Prr5;Actn3;Prdx3;Apbb1;Bax;Bcl2l2;Bik;Coq7;Ctsd;Fer;Fxn;Bscl2;Hmgcl;Igf2;Kcnq1;Kifc3;Eif2d;Llgl1;Lrp1;Hdac10;Hook2;Zfp369;Nedd9;Nrxn1;Pex19;Scin;Slc2a4;Snap25;Aurkb;Dtx3l;Satb2;Wrap53;Stxbp6;Trp53;Traf7;Onecut2;Ndufs8;Taf6l;Ablim1;Golph3l;Kdm4a;Ccdc61;Vps33b;Tmem159;Jtb;Stard13;Cln8;Vps39;Rpl3;Tango2;Smtn;Timm10;Fgd3;Fchsd1;Kash5;Primpol;Cibar2;Chek2;Cbx7;Zwint;Nme6;Stx8;Akap…
10			5.2	GO:0007005	mitochondrion organization	A process that is carried out at the cellular level which results in the assembly, arrangement of constituent parts, or disassembly of a mitochondrion; includes mitochondrial morphogenesis and distribution, and replication of the mitochondrial genome as well as synthesis of new mitochondrial components.	3.08% (16/520)	0.0122702	1.91	NA	NA	4.81% (25/520)	4.56563e-05	4.34	11757;12028;12050;12124;12850;14297;15356;22059;225887;23922;26889;30059;408022;66091;66271;66437;67391;67844;68185;68472;69773;70544;71701;72113;74919	Prdx3;Bax;Bcl2l2;Bik;Coq7;Fxn;Hmgcl;Trp53;Ndufs8;Jtb;Cln8;Timm10;Primpol;Ndufa3;Tmem126a;Fis1;Fundc2;Rab32;Coa4;Tmem126b;Timm29;Tmem242;Pnpt1;Adck1;Slc35f6
11		Cellular process	7.76	GO:0043407	negative regulation of MAP kinase activity	Any process that stops, prevents, or reduces the frequency, rate or extent of MAP kinase activity.	7.94% (5/63)	0.00369231	2.43	12389;19735;20319;68082;74769	Cav1;Rgs2;Sfrp2;Dusp19;Pik3cb	3.17% (2/63)	0.354763	0.45	NA	NA
11			8.45	GO:1902253	regulation of intrinsic apoptotic signaling pathway by p53 class mediator	NA	3.12% (1/32)	0.410442	0.39	NA	NA	12.5% (4/32)	0.00349728	2.46	22059;382985;68428;75736	Trp53;Rrm2b;Steap3;Bcl2l12
11			5.63	GO:2001233	regulation of apoptotic signaling pathway	NA	2.34% (10/428)	0.166298	0.78	NA	NA	3.97% (17/428)	0.00537152	2.27	12028;12050;12124;12905;14297;15368;21672;22059;224619;237313;382985;66073;66437;68428;69660;74919;75736	Bax;Bcl2l2;Bik;Cradd;Fxn;Hmox1;Prdx2;Trp53;Traf7;Il20ra;Rrm2b;Txndc12;Fis1;Steap3;Tmbim1;Slc35f6;Bcl2l12
11			6.63	GO:2001242	regulation of intrinsic apoptotic signaling pathway	NA	1.7% (3/176)	0.551942	0.26	NA	NA	5.11% (9/176)	0.00853779	2.07	12028;12050;22059;237313;382985;66073;66437;68428;75736	Bax;Bcl2l2;Trp53;Il20ra;Rrm2b;Txndc12;Fis1;Steap3;Bcl2l12
11			9.5	GO:0010739	positive regulation of protein kinase A signaling	Any process that increases the rate, frequency, or extent of protein kinase A signaling. PKA signaling is the series of reactions, mediated by the intracellular serine/threonine kinase protein kinase A, which occurs as a result of a single trigger reaction or compound.	15.38% (2/13)	0.0184929	1.73	NA	NA	23.08% (3/13)	0.00189416	2.72	18189;69068;76573	Nrxn1;Tcim;Spatc1l
11			8.38	GO:2000050	regulation of non-canonical Wnt signaling pathway	NA	11.54% (3/26)	0.00855029	2.07	20319;69217;76441	Sfrp2;Plekha4;Daam2	7.69% (2/26)	0.0928851	1.03	NA	NA
11			3.28	GO:0009966	regulation of signal transduction	Any process that modulates the frequency, rate or extent of signal transduction.	2.07% (61/2943)	0.0302087	1.52	NA	NA	2.68% (79/2943)	0.0027335	2.56	107045;107607;109270;11474;12028;12050;12124;12142;12388;12905;13636;13983;140859;14119;14158;14297;14705;15368;16002;16897;16971;18189;19156;19205;19415;20336;20429;20528;21413;21672;21937;22059;22084;22158;22415;224619;225631;228812;232339;237313;243362;243910;268860;268933;270190;27403;29867;320207;320924;329252;382985;50929;53322;54131;547253;66073;66437;66568;668303;67009;68082;68151;68212;6…	Lars;Nod1;Prr5;Actn3;Bax;Bcl2l2;Bik;Prdm1;Ctnnd1;Cradd;Efna1;Esr2;Nek8;Fbn2;Fer;Fxn;Bscl2;Hmox1;Igf2;Llgl1;Lrp1;Nrxn1;Psap;Ptbp1;Rasal1;Exoc4;Shox2;Slc2a4;Tcf4;Prdx2;Tnfrsf1a;Trp53;Tsc2;Tulp3;Wnt3;Traf7;Onecut2;Pigu;Ankrd26;Il20ra;Stard13;Nfkbid;Abat;Wdr24;Ephb1;Abca7;Cabp1;Pik3r5;Ccbe1;Lgr6;Rrm2b;Il22;Nucb2;Irf3;Parp14;Txndc12;Fis1;Rwdd3;Kif26a;Ttc23;Dusp19;Wls;Tmbim4;Steap3;Tcim;Plekha4;Enho;Tm…
11			6.64	GO:0072331	signal transduction by p53 class mediator	An intracellular signaling process that is induced by the cell cycle regulator phosphoprotein p53 or an equivalent protein.	2.7% (4/148)	0.224472	0.65	NA	NA	5.41% (8/148)	0.00936046	2.03	12028;12905;22059;382985;50883;68428;68539;75736	Bax;Cradd;Trp53;Rrm2b;Chek2;Steap3;Tmem109;Bcl2l12
11			7.04	GO:0008630	intrinsic apoptotic signaling pathway in response to DNA damage	A series of molecular signals in which an intracellular signal is conveyed to trigger the apoptotic death of a cell. The pathway is induced by the detection of DNA damage, and ends when the execution phase of apoptosis is triggered.	2.68% (3/112)	0.277701	0.56	NA	NA	8.04% (9/112)	0.000388078	3.41	12028;12050;15368;21937;22059;50883;68428;68539;75736	Bax;Bcl2l2;Hmox1;Tnfrsf1a;Trp53;Chek2;Steap3;Tmem109;Bcl2l12
11			8.01	GO:0042771	intrinsic apoptotic signaling pathway in response to DNA damage by p53 class mediator	A series of molecular signals in which an intracellular signal is conveyed to trigger the apoptotic death of a cell. The pathway is induced by the cell cycle regulator phosphoprotein p53, or an equivalent protein, in response to the detection of DNA damage, and ends when the execution phase of apoptosis is triggered.	6.82% (3/44)	0.0351366	1.45	NA	NA	11.36% (5/44)	0.00170047	2.77	22059;50883;68428;68539;75736	Trp53;Chek2;Steap3;Tmem109;Bcl2l12
11			7.38	GO:0072332	intrinsic apoptotic signaling pathway by p53 class mediator	A series of molecular signals in which an intracellular signal is conveyed to trigger the apoptotic death of a cell. The pathway is induced by the cell cycle regulator phosphoprotein p53, or an equivalent protein, and ends when the execution phase of apoptosis is triggered.	3.61% (3/83)	0.154963	0.81	NA	NA	8.43% (7/83)	0.00128472	2.89	12028;22059;382985;50883;68428;68539;75736	Bax;Trp53;Rrm2b;Chek2;Steap3;Tmem109;Bcl2l12
11			5.03	GO:0097190	apoptotic signaling pathway	A series of molecular signals which triggers the apoptotic death of a cell. The pathway starts with reception of a signal, and ends when the execution phase of apoptosis is triggered.	2.71% (17/627)	0.0300055	1.52	NA	NA	3.67% (23/627)	0.00357343	2.45	12028;12050;12124;12367;12905;13983;14297;15368;17279;21672;21937;22059;224619;237313;382985;50883;66073;66437;68428;68539;69660;74919;75736	Bax;Bcl2l2;Bik;Casp3;Cradd;Esr2;Fxn;Hmox1;Melk;Prdx2;Tnfrsf1a;Trp53;Traf7;Il20ra;Rrm2b;Chek2;Txndc12;Fis1;Steap3;Tmem109;Tmbim1;Slc35f6;Bcl2l12
11			5.9	GO:0097193	intrinsic apoptotic signaling pathway	A series of molecular signals in which an intracellular signal is conveyed to trigger the apoptotic death of a cell. The pathway starts with reception of an intracellular signal (e.g. DNA damage, endoplasmic reticulum stress, oxidative stress etc.), and ends when the execution phase of apoptosis is triggered. The intrinsic apoptotic signaling pathway is crucially regulated by permeabilization of …	1.63% (5/307)	0.566416	0.25	NA	NA	4.89% (15/307)	0.00126241	2.9	12028;12050;12367;15368;17279;21937;22059;237313;382985;50883;66073;66437;68428;68539;75736	Bax;Bcl2l2;Casp3;Hmox1;Melk;Tnfrsf1a;Trp53;Il20ra;Rrm2b;Chek2;Txndc12;Fis1;Steap3;Tmem109;Bcl2l12
11			9.43	GO:0086103	G protein-coupled receptor signaling pathway involved in heart process	An G protein-coupled receptor signaling pathway which contributes to a circulatory system process carried out by the heart.	21.43% (3/14)	0.00138389	2.86	12389;19735;56089	Cav1;Rgs2;Ramp3	0% (0/14)	1	0	NA	NA
11			4.47	GO:0007167	enzyme linked receptor protein signaling pathway	Any series of molecular signals initiated by the binding of an extracellular ligand to a receptor on the surface of the target cell, where the receptor possesses catalytic activity or is closely associated with an enzyme such as a protein kinase, and ending with regulation of a downstream cellular process, e.g. transcription.	2.68% (26/969)	0.00967209	2.01	11539;12305;12389;12445;12683;13867;13983;14587;14718;16002;19267;20319;20320;20416;211151;21413;227358;23920;26569;27273;329628;67112;70568;71943;74769;77531	Adora1;Ddr1;Cav1;Ccnd3;Cidea;Erbb3;Esr2;Gfra3;Got1;Igf2;Ptpre;Sfrp2;Nptn;Shc1;Churc1;Tcf4;Erfe;Insrr;Slc27a4;Pdk4;Fat4;Fgf22;Cpne3;Tom1l1;Pik3cb;Anks1b	2.17% (21/969)	0.364123	0.44	NA	NA
11			5.13	GO:0007169	transmembrane receptor protein tyrosine kinase signaling pathway	A series of molecular signals initiated by the binding of an extracellular ligand to a receptor on the surface of the target cell where the receptor possesses tyrosine kinase activity, and ending with regulation of a downstream cellular process, e.g. transcription.	3.62% (22/608)	0.000477113	3.32	11539;12305;12445;13867;13983;14587;16002;19267;20320;20416;211151;21413;227358;23920;26569;27273;329628;67112;70568;71943;74769;77531	Adora1;Ddr1;Ccnd3;Erbb3;Esr2;Gfra3;Igf2;Ptpre;Nptn;Shc1;Churc1;Tcf4;Erfe;Insrr;Slc27a4;Pdk4;Fat4;Fgf22;Cpne3;Tom1l1;Pik3cb;Anks1b	2.96% (18/608)	0.0592686	1.23	NA	NA
11			4.07	GO:0042981	regulation of apoptotic process	Any process that modulates the occurrence or rate of cell death by apoptotic process.	2.27% (36/1588)	0.0297979	1.53	NA	NA	2.9% (46/1588)	0.00604835	2.22	106869;107607;11737;11757;11785;11921;12028;12050;12124;12367;12716;12905;13033;13636;13983;14297;14609;15368;16971;17279;17314;18103;20259;20877;216134;21672;21937;22059;224045;224619;237313;243910;26889;382985;50883;54131;64138;66073;66437;68212;68428;68510;69068;69660;74919;75736	Tnfaip8;Nod1;Anp32a;Prdx3;Apbb1;Atoh1;Bax;Bcl2l2;Bik;Casp3;Ckmt1;Cradd;Ctsd;Efna1;Esr2;Fxn;Gja1;Hmox1;Lrp1;Melk;Mgmt;Nme2;Scin;Aurkb;Pdxk;Prdx2;Tnfrsf1a;Trp53;Eif2b5;Traf7;Il20ra;Nfkbid;Cln8;Rrm2b;Chek2;Irf3;Ctsz;Txndc12;Fis1;Tmbim4;Steap3;Ints1;Tcim;Tmbim1;Slc35f6;Bcl2l12
11			4.04	GO:0043067	regulation of programmed cell death	Any process that modulates the frequency, rate or extent of programmed cell death, cell death resulting from activation of endogenous cellular processes.	2.23% (36/1614)	0.0365573	1.44	NA	NA	2.91% (47/1614)	0.00503589	2.3	106869;107607;11737;11757;11785;11921;12028;12050;12124;12367;12716;12905;13033;13636;13983;14297;14609;15368;16971;17279;17314;18103;20259;20877;216134;21672;21937;22059;224045;224619;237313;243910;26889;382985;50883;54131;64138;66073;66437;68212;68428;68510;69068;69305;69660;74919;75736	Tnfaip8;Nod1;Anp32a;Prdx3;Apbb1;Atoh1;Bax;Bcl2l2;Bik;Casp3;Ckmt1;Cradd;Ctsd;Efna1;Esr2;Fxn;Gja1;Hmox1;Lrp1;Melk;Mgmt;Nme2;Scin;Aurkb;Pdxk;Prdx2;Tnfrsf1a;Trp53;Eif2b5;Traf7;Il20ra;Nfkbid;Cln8;Rrm2b;Chek2;Irf3;Ctsz;Txndc12;Fis1;Tmbim4;Steap3;Ints1;Tcim;Dcps;Tmbim1;Slc35f6;Bcl2l12
11			3.91	GO:0010941	regulation of cell death	Any process that modulates the rate or frequency of cell death. Cell death is the specific activation or halting of processes within a cell so that its vital functions markedly cease, rather than simply deteriorating gradually over time, which culminates in cell death.	2.24% (40/1786)	0.0268542	1.57	NA	NA	3.02% (54/1786)	0.00118844	2.93	106869;107607;11737;11757;11785;11921;12028;12050;12124;12367;12716;12905;13033;13636;13712;13983;14297;14609;15368;16971;17279;17314;18103;19125;19156;20259;20877;216134;21672;21937;22059;224045;224619;230674;237313;243910;26889;270190;382985;50493;50883;54131;64138;66073;66437;68212;68428;68510;68539;69068;69305;69660;74919;75736	Tnfaip8;Nod1;Anp32a;Prdx3;Apbb1;Atoh1;Bax;Bcl2l2;Bik;Casp3;Ckmt1;Cradd;Ctsd;Efna1;Elk1;Esr2;Fxn;Gja1;Hmox1;Lrp1;Melk;Mgmt;Nme2;Prodh;Psap;Scin;Aurkb;Pdxk;Prdx2;Tnfrsf1a;Trp53;Eif2b5;Traf7;Kdm4a;Il20ra;Nfkbid;Cln8;Ephb1;Rrm2b;Txnrd1;Chek2;Irf3;Ctsz;Txndc12;Fis1;Tmbim4;Steap3;Ints1;Tmem109;Tcim;Dcps;Tmbim1;Slc35f6;Bcl2l12
11			4.95	GO:0010942	positive regulation of cell death	Any process that increases the rate or frequency of cell death. Cell death is the specific activation or halting of processes within a cell so that its vital functions markedly cease, rather than simply deteriorating gradually over time, which culminates in cell death.	2.71% (20/738)	0.0197619	1.7	NA	NA	3.52% (26/738)	0.00345505	2.46	106869;107607;11785;12028;12124;12367;12905;13033;13712;13983;15368;16971;17279;19125;20259;21937;22059;224045;224619;237313;243910;50493;50883;64138;66437;68428	Tnfaip8;Nod1;Apbb1;Bax;Bik;Casp3;Cradd;Ctsd;Elk1;Esr2;Hmox1;Lrp1;Melk;Prodh;Scin;Tnfrsf1a;Trp53;Eif2b5;Traf7;Il20ra;Nfkbid;Txnrd1;Chek2;Ctsz;Fis1;Steap3
11			9	GO:0070230	positive regulation of lymphocyte apoptotic process	Any process that activates or increases the frequency, rate or extent of lymphocyte death by apoptotic process.	0% (0/21)	1	0	NA	NA	14.29% (3/21)	0.00783485	2.11	12028;22059;243910	Bax;Trp53;Nfkbid
11			7.56	GO:0043525	positive regulation of neuron apoptotic process	Any process that activates or increases the frequency, rate or extent of cell death of neurons by apoptotic process.	0% (0/85)	1	0	NA	NA	7.06% (6/85)	0.00679111	2.17	12028;12367;21937;22059;64138;66437	Bax;Casp3;Tnfrsf1a;Trp53;Ctsz;Fis1
11			9.14	GO:1900119	positive regulation of execution phase of apoptosis	NA	5.26% (1/19)	0.269215	0.57	NA	NA	15.79% (3/19)	0.00587735	2.23	12028;12367;22059	Bax;Casp3;Trp53
11			3.52	GO:0008219	cell death	Any biological process that results in permanent cessation of all vital functions of a cell. A cell should be considered dead when any one of the following molecular or morphological criteria is met: (1) the cell has lost the integrity of its plasma membrane; (2) the cell, including its nucleus, has undergone complete fragmentation into discrete bodies (frequently referred to as apoptotic bodies)…	2.01% (44/2185)	0.0875851	1.06	NA	NA	2.93% (64/2185)	0.000925659	3.03	106869;107607;11302;11737;11757;11785;11921;12028;12050;12124;12367;12716;12905;13033;13636;13712;13983;14297;14609;15368;16971;170936;17279;17314;18103;19125;19156;20259;20346;20877;216134;21672;21937;22059;22084;22368;224045;224619;230674;237313;23922;243910;26889;270190;353211;382985;50493;50883;54131;54447;64138;66073;66437;68212;68428;68510;68539;68796;68917;69068;69305;69660;74919;75736	Tnfaip8;Nod1;Aatk;Anp32a;Prdx3;Apbb1;Atoh1;Bax;Bcl2l2;Bik;Casp3;Ckmt1;Cradd;Ctsd;Efna1;Elk1;Esr2;Fxn;Gja1;Hmox1;Lrp1;Zfp369;Melk;Mgmt;Nme2;Prodh;Psap;Scin;Sema3a;Aurkb;Pdxk;Prdx2;Tnfrsf1a;Trp53;Tsc2;Trpv2;Eif2b5;Traf7;Kdm4a;Il20ra;Jtb;Nfkbid;Cln8;Ephb1;Prune2;Rrm2b;Txnrd1;Chek2;Irf3;Asah2;Ctsz;Txndc12;Fis1;Tmbim4;Steap3;Ints1;Tmem109;Tmem214;Hint2;Tcim;Dcps;Tmbim1;Slc35f6;Bcl2l12
11			3.68	GO:0006915	apoptotic process	A programmed cell death process which begins when a cell receives an internal (e.g. DNA damage) or external signal (e.g. an extracellular death ligand), and proceeds through a series of biochemical events (signaling pathway phase) which trigger an execution phase. The execution phase is the last step of an apoptotic process, and is typically characterized by rounding-up of the cell, retraction of…	2.11% (41/1947)	0.0571403	1.24	NA	NA	2.93% (57/1947)	0.00181244	2.74	106869;107607;11302;11737;11757;11785;11921;12028;12050;12124;12367;12716;12905;13033;13636;13983;14297;14609;15368;16971;170936;17279;17314;18103;20259;20346;20877;216134;21672;21937;22059;22084;22368;224045;224619;237313;23922;243910;26889;353211;382985;50883;54131;54447;64138;66073;66437;68212;68428;68510;68539;68796;68917;69068;69660;74919;75736	Tnfaip8;Nod1;Aatk;Anp32a;Prdx3;Apbb1;Atoh1;Bax;Bcl2l2;Bik;Casp3;Ckmt1;Cradd;Ctsd;Efna1;Esr2;Fxn;Gja1;Hmox1;Lrp1;Zfp369;Melk;Mgmt;Nme2;Scin;Sema3a;Aurkb;Pdxk;Prdx2;Tnfrsf1a;Trp53;Tsc2;Trpv2;Eif2b5;Traf7;Il20ra;Jtb;Nfkbid;Cln8;Prune2;Rrm2b;Chek2;Irf3;Asah2;Ctsz;Txndc12;Fis1;Tmbim4;Steap3;Ints1;Tmem109;Tmem214;Hint2;Tcim;Tmbim1;Slc35f6;Bcl2l12
11			3.62	GO:0012501	programmed cell death	A process which begins when a cell receives an internal or external signal and activates a series of biochemical events (signaling pathway). The process ends with the death of the cell.	2.05% (41/2002)	0.0799183	1.1	NA	NA	2.9% (58/2002)	0.00209085	2.68	106869;107607;11302;11737;11757;11785;11921;12028;12050;12124;12367;12716;12905;13033;13636;13983;14297;14609;15368;16971;170936;17279;17314;18103;20259;20346;20877;216134;21672;21937;22059;22084;22368;224045;224619;237313;23922;243910;26889;353211;382985;50883;54131;54447;64138;66073;66437;68212;68428;68510;68539;68796;68917;69068;69305;69660;74919;75736	Tnfaip8;Nod1;Aatk;Anp32a;Prdx3;Apbb1;Atoh1;Bax;Bcl2l2;Bik;Casp3;Ckmt1;Cradd;Ctsd;Efna1;Esr2;Fxn;Gja1;Hmox1;Lrp1;Zfp369;Melk;Mgmt;Nme2;Scin;Sema3a;Aurkb;Pdxk;Prdx2;Tnfrsf1a;Trp53;Tsc2;Trpv2;Eif2b5;Traf7;Il20ra;Jtb;Nfkbid;Cln8;Prune2;Rrm2b;Chek2;Irf3;Asah2;Ctsz;Txndc12;Fis1;Tmbim4;Steap3;Ints1;Tmem109;Tmem214;Hint2;Tcim;Dcps;Tmbim1;Slc35f6;Bcl2l12
11			8.81	GO:0070242	thymocyte apoptotic process	Any apoptotic process in a thymocyte, an immature T cell located in the thymus.	0% (0/23)	1	0	NA	NA	17.39% (4/23)	0.000990669	3	12028;13636;22059;243910	Bax;Efna1;Trp53;Nfkbid
11			9.05	GO:0070243	regulation of thymocyte apoptotic process	Any process that modulates the occurrence or rate of thymocyte death by apoptotic process.	0% (0/17)	1	0	NA	NA	17.65% (3/17)	0.00424689	2.37	13636;22059;243910	Efna1;Trp53;Nfkbid
12		Response to stimulus	5.68	GO:1901652	response to peptide	NA	3.64% (15/412)	0.00346447	2.46	11555;11938;12286;12333;12389;12445;14130;16002;19267;20416;227358;26569;27273;434784;56089	Adrb2;Atp2a2;Cacna1a;Capn1;Cav1;Ccnd3;Fcgr2b;Igf2;Ptpre;Shc1;Erfe;Slc27a4;Pdk4;Ldoc1;Ramp3	4.13% (17/412)	0.00368961	2.43	107607;13654;14158;14609;16002;16535;16971;20528;20714;22059;22084;224045;232339;50880;53322;66437;75747	Nod1;Egr2;Fer;Gja1;Igf2;Kcnq1;Lrp1;Slc2a4;Serpina3k;Trp53;Tsc2;Eif2b5;Ankrd26;Scly;Nucb2;Fis1;Sesn3
12			8.29	GO:1904645	response to amyloid-beta	NA	10.26% (4/39)	0.00369394	2.43	11555;12286;14130;56089	Adrb2;Cacna1a;Fcgr2b;Ramp3	5.13% (2/39)	0.179934	0.74	NA	NA
12			6.95	GO:0008286	insulin receptor signaling pathway	The series of molecular signals generated as a consequence of the insulin receptor binding to insulin.	5.47% (7/128)	0.00518133	2.29	12445;16002;19267;20416;227358;26569;27273	Ccnd3;Igf2;Ptpre;Shc1;Erfe;Slc27a4;Pdk4	4.69% (6/128)	0.0419344	1.38	NA	NA
12			5.98	GO:1901653	cellular response to peptide	NA	3.9% (12/308)	0.00505181	2.3	11555;12286;12389;12445;14130;16002;19267;20416;227358;26569;27273;434784	Adrb2;Cacna1a;Cav1;Ccnd3;Fcgr2b;Igf2;Ptpre;Shc1;Erfe;Slc27a4;Pdk4;Ldoc1	3.9% (12/308)	0.0202271	1.69	NA	NA
12			8.06	GO:0010332	response to gamma radiation	Any process that results in a change in state or activity of a cell or an organism (in terms of movement, secretion, enzyme production, gene expression, etc.) as a result of a gamma radiation stimulus. Gamma radiation is a form of electromagnetic radiation (EMR) or light emission of a specific frequency produced from sub-atomic particle interaction, such as electron-positron annihilation and radi…	2.04% (1/49)	0.554872	0.26	NA	NA	10.2% (5/49)	0.00275472	2.56	12028;13712;22059;50883;68539	Bax;Elk1;Trp53;Chek2;Tmem109
12			8.64	GO:0071480	cellular response to gamma radiation	Any process that results in a change in state or activity of a cell (in terms of movement, secretion, enzyme production, gene expression, etc.) as a result of a gamma radiation stimulus. Gamma radiation is a form of electromagnetic radiation (EMR) or light emission of a specific frequency produced from sub-atomic particle interaction, such as electron-positron annihilation and radioactive decay. …	3.57% (1/28)	0.370163	0.43	NA	NA	14.29% (4/28)	0.00211896	2.67	13712;22059;50883;68539	Elk1;Trp53;Chek2;Tmem109
12			8.88	GO:0010039	response to iron ion	Any process that results in a change in state or activity of a cell or an organism (in terms of movement, secretion, enzyme production, gene expression, etc.) as a result of an iron ion stimulus.	9.09% (2/22)	0.049745	1.3	NA	NA	13.64% (3/22)	0.00894069	2.05	14297;15368;268860	Fxn;Hmox1;Abat
12			6.73	GO:0097237	cellular response to toxic substance	Any process that results in a change in state or activity of a cell (in terms of movement, secretion, enzyme production, gene expression, etc.) as a result of a toxic stimulus.	2.21% (4/181)	0.34415	0.46	NA	NA	5.52% (10/181)	0.00332858	2.48	11758;13885;14297;15368;19156;21672;22059;387170;67247;68992	Prdx6;Esd;Fxn;Hmox1;Psap;Prdx2;Trp53;Mir152;Mtarc2;Zfp580
12			8.23	GO:0035094	response to nicotine	Any process that results in a change in state or activity of a cell or an organism (in terms of movement, secretion, enzyme production, gene expression, etc.) as a result of a nicotine stimulus.	6.45% (2/31)	0.091066	1.04	NA	NA	12.9% (4/31)	0.00310798	2.51	15368;16002;16535;268860	Hmox1;Igf2;Kcnq1;Abat
12			2.8	GO:0042221	response to chemical	Any process that results in a change in state or activity of a cell or an organism (in terms of movement, secretion, enzyme production, gene expression, etc.) as a result of a chemical stimulus.	2.12% (94/4425)	0.00337312	2.47	100502841;100702;107581;107589;11428;11433;11539;11555;11658;11898;11906;11938;11977;12036;12142;12286;12307;12333;12369;12389;12394;12445;12642;12683;13983;14130;14587;14652;14683;14718;14872;15511;16002;16440;16772;16847;17181;17309;17872;18028;18260;18483;18845;19223;19267;193385;19735;20319;20320;20355;20416;20538;20979;211151;212712;213990;21413;217069;223723;224829;22658;226641;226646;22735…	Epg5;Gbp6;Col16a1;Mylk;Aco1;Acp5;Adora1;Adrb2;Alcam;Ass1;Zfhx3;Atp2a2;Atp7a;Bcat2;Prdm1;Cacna1a;Calb1;Capn1;Casp7;Cav1;Runx1;Ccnd3;Ch25h;Cidea;Esr2;Fcgr2b;Gfra3;Glp1r;Gnas;Got1;Gstt2;Hspa1b;Igf2;Itpr3;Lama1;Lepr;Matn2;Mgat3;Ppp1r15a;Nfib;Ocln;Palm;Plxna2;Ptgis;Ptpre;Ripor2;Rgs2;Sfrp2;Nptn;Sema4f;Shc1;Slc6a2;Syt1;Churc1;Satb2;Agap3;Tcf4;Trim25;Ttll12;Trerf1;Pcgf2;Atf6;Ndufs2;Erfe;Arhgef16;Gramd1b;…	2.28% (101/4425)	0.0604091	1.22	NA	NA
12			5.93	GO:0009636	response to toxic substance	Any process that results in a change in state or activity of a cell or an organism (in terms of movement, secretion, enzyme production, gene expression, etc.) as a result of a toxic stimulus.	1.95% (7/359)	0.373287	0.43	NA	NA	5.01% (18/359)	0.000315911	3.5	11757;11758;11898;12028;12367;13162;13885;14297;15368;16002;16535;19156;21672;22059;268860;387170;67247;68992	Prdx3;Prdx6;Ass1;Bax;Casp3;Slc6a3;Esd;Fxn;Hmox1;Igf2;Kcnq1;Psap;Prdx2;Trp53;Abat;Mir152;Mtarc2;Zfp580
12			3.65	GO:0033554	cellular response to stress	Any process that results in a change in state or activity of a cell (in terms of movement, secretion, enzyme production, gene expression, etc.) as a result of a stimulus indicating the organism is under stress. The stress is usually, but not necessarily, exogenous (e.g. temperature, humidity, ionizing radiation).	1.97% (37/1882)	0.140355	0.85	NA	NA	3.03% (57/1882)	0.000829702	3.08	104156;107045;107607;107723;107829;11757;11785;11898;12028;12050;12367;12850;12905;14158;14297;15368;16971;170787;17181;17279;17314;18207;19156;19698;20528;208647;209200;21672;216853;21937;22059;224045;234258;268933;270190;27403;382985;384619;408022;50880;50883;64295;66073;66422;66568;67247;68067;68082;68428;68539;68964;68992;69034;69068;71701;75736;75747	Etv5;Lars;Nod1;Slc12a6;Thoc5;Prdx3;Apbb1;Ass1;Bax;Bcl2l2;Casp3;Coq7;Cradd;Fer;Fxn;Hmox1;Lrp1;Hdac10;Matn2;Melk;Mgmt;Nthl1;Psap;Relb;Slc2a4;Creb3l2;Dtx3l;Prdx2;Wrap53;Tnfrsf1a;Trp53;Eif2b5;Neil3;Wdr24;Ephb1;Abca7;Rrm2b;Kash5;Primpol;Scly;Chek2;Tmub1;Txndc12;Dctpp1;Rwdd3;Mtarc2;Mrnip;Dusp19;Steap3;Tmem109;Ctc1;Zfp580;Nupr1l;Tcim;Pnpt1;Bcl2l12;Sesn3
12			6.1	GO:0034599	cellular response to oxidative stress	Any process that results in a change in state or activity of a cell (in terms of movement, secretion, enzyme production, gene expression, etc.) as a result of oxidative stress, a state often resulting from exposure to high levels of reactive oxygen species, e.g. superoxide anions, hydrogen peroxide (H2O2), and hydroxyl radicals.	2.45% (7/286)	0.190096	0.72	NA	NA	4.55% (13/286)	0.00478716	2.32	104156;11757;12850;14158;14297;15368;17279;19156;21672;22059;50880;68992;71701	Etv5;Prdx3;Coq7;Fer;Fxn;Hmox1;Melk;Psap;Prdx2;Trp53;Scly;Zfp580;Pnpt1
12			5.92	GO:0062197	cellular response to chemical stress	Any process that results in a change in state or activity of a cell (in terms of movement, secretion, enzyme production, gene expression, etc.) as a result of a chemical stimulus indicating the organism is under stress.	2.59% (9/348)	0.119507	0.92	NA	NA	4.89% (17/348)	0.000616362	3.21	104156;107723;11757;12367;12850;14158;14297;15368;17279;19156;19698;20528;21672;22059;50880;68992;71701	Etv5;Slc12a6;Prdx3;Casp3;Coq7;Fer;Fxn;Hmox1;Melk;Psap;Relb;Slc2a4;Prdx2;Trp53;Scly;Zfp580;Pnpt1
12			6.5	GO:0000302	response to reactive oxygen species	Any process that results in a change in state or activity of a cell or an organism (in terms of movement, secretion, enzyme production, gene expression, etc.) as a result of a reactive oxygen species stimulus. Reactive oxygen species include singlet oxygen, superoxide, and oxygen free radicals.	2.42% (5/207)	0.252027	0.6	NA	NA	6.28% (13/207)	0.000259056	3.59	11671;11757;11758;12367;14158;14297;15368;19156;21672;22059;26462;68992;75747	Aldh3a2;Prdx3;Prdx6;Casp3;Fer;Fxn;Hmox1;Psap;Prdx2;Trp53;Txnrd2;Zfp580;Sesn3
12			2.84	GO:0006950	response to stress	Any process that results in a change in state or activity of a cell or an organism (in terms of movement, secretion, enzyme production, gene expression, etc.) as a result of a disturbance in organismal or cellular homeostasis, usually, but not necessarily, exogenous (e.g. temperature, humidity, ionizing radiation).	1.97% (77/3911)	0.0440557	1.36	NA	NA	2.51% (98/3911)	0.00649625	2.19	104156;104252;106869;107045;107569;107607;107723;107829;11671;11757;11758;11785;11898;12028;12050;12142;12367;12642;12850;12905;13983;14158;14297;14609;15227;15368;16002;16363;16971;17035;170787;17181;17279;17314;18207;19156;19698;20528;208647;209200;21354;21672;216853;21937;22059;22084;22368;224045;225887;230674;233405;234258;237886;23959;243362;243910;26462;268860;26889;268933;270190;27403;2740…	Etv5;Cdc42ep2;Tnfaip8;Lars;Nt5c3;Nod1;Slc12a6;Thoc5;Aldh3a2;Prdx3;Prdx6;Apbb1;Ass1;Bax;Bcl2l2;Prdm1;Casp3;Ch25h;Coq7;Cradd;Esr2;Fer;Fxn;Gja1;Foxf1;Hmox1;Igf2;Irf2;Lrp1;Lxn;Hdac10;Matn2;Melk;Mgmt;Nthl1;Psap;Relb;Slc2a4;Creb3l2;Dtx3l;Tap1;Prdx2;Wrap53;Tnfrsf1a;Trp53;Tsc2;Trpv2;Eif2b5;Ndufs8;Kdm4a;Vps33b;Neil3;Slfn9;Nt5e;Stard13;Nfkbid;Txnrd2;Abat;Cln8;Wdr24;Ephb1;Abca7;Abcf3;Lgr6;Rrm2b;Kash5;Primpo…
12			5.61	GO:0006979	response to oxidative stress	Any process that results in a change in state or activity of a cell or an organism (in terms of movement, secretion, enzyme production, gene expression, etc.) as a result of oxidative stress, a state often resulting from exposure to high levels of reactive oxygen species, e.g. superoxide anions, hydrogen peroxide (H2O2), and hydroxyl radicals.	2.13% (9/423)	0.258355	0.59	NA	NA	5.2% (22/423)	4.11383e-05	4.39	104156;11671;11757;11758;12367;12850;14158;14297;15368;17279;19156;21672;22059;225887;26462;26889;382985;50493;50880;68992;71701;75747	Etv5;Aldh3a2;Prdx3;Prdx6;Casp3;Coq7;Fer;Fxn;Hmox1;Melk;Psap;Prdx2;Trp53;Ndufs8;Txnrd2;Cln8;Rrm2b;Txnrd1;Scly;Zfp580;Pnpt1;Sesn3
13		Process	7.89	GO:0035176	social behavior	Behavior directed towards society, or taking place between members of the same species. Occurs predominantly, or only, in individuals that are part of a group.	0% (0/61)	1	0	NA	NA	8.2% (5/61)	0.00708969	2.15	14415;16535;18189;22084;26889	Gad1;Kcnq1;Nrxn1;Tsc2;Cln8
13			7.81	GO:0051703	intraspecies interaction between organisms	Any process in which an organism has an effect on an organism of the same species.	0% (0/64)	1	0	NA	NA	7.81% (5/64)	0.00866114	2.06	14415;16535;18189;22084;26889	Gad1;Kcnq1;Nrxn1;Tsc2;Cln8
13			4.05	GO:0022610	biological adhesion	The attachment of a cell or organism to a substrate, another cell, or other organism. Biological adhesion includes intracellular attachment between membrane regions.	2.49% (36/1447)	0.00822988	2.08	100702;107581;11433;11474;11555;11658;11898;11906;12305;12333;12389;12394;13867;14270;14343;14683;16002;16772;17311;18845;19266;193385;20320;20416;20971;268860;27279;319504;319655;329628;56079;65945;70370;74769;83436;93875	Gbp6;Col16a1;Acp5;Actn3;Adrb2;Alcam;Ass1;Zfhx3;Ddr1;Capn1;Cav1;Runx1;Erbb3;Srgap2;Fut1;Gnas;Igf2;Lama1;Kitl;Plxna2;Ptprd;Ripor2;Nptn;Shc1;Sdc4;Abat;Tnfrsf12a;Nrcam;Podxl2;Fat4;Astn2;Clstn1;Fbln7;Pik3cb;Plekha2;Pcdhb4	1.66% (24/1447)	0.840871	0.08	NA	NA
13			6.52	GO:0019882	antigen processing and presentation	The process in which an antigen-presenting cell expresses antigen (peptide or lipid) on its cell surface in association with an MHC protein complex.	2.38% (3/126)	0.34027	0.47	NA	NA	6.35% (8/126)	0.0036204	2.44	107607;16912;16913;19156;19186;19698;21354;67844	Nod1;Psmb9;Psmb8;Psap;Psme1;Relb;Tap1;Rab32
13			8.96	GO:0008356	asymmetric cell division	The asymmetric division of cells to produce two daughter cells with different developmental potentials. It is of fundamental significance for the generation of cell diversity.	0% (0/22)	1	0	NA	NA	13.64% (3/22)	0.00894069	2.05	104156;20678;21678	Etv5;Sox5;Tead3
13			9.57	GO:0098722	asymmetric stem cell division	Division of a stem cell during which it retains its identity and buds off a daughter cell with a new identity.	0% (0/12)	1	0	NA	NA	25% (3/12)	0.00147863	2.83	104156;20678;21678	Etv5;Sox5;Tead3
13			4.08	GO:0016477	cell migration	The controlled self-propelled movement of a cell from one site to a destination guided by molecular cues. Cell migration is a central process in the development and maintenance of multicellular organisms.	2.45% (38/1553)	0.00866465	2.06	107589;11433;11539;11977;12305;12333;12389;12642;13983;14270;14343;14587;16002;16772;17181;17309;17311;18845;192662;193385;20319;20355;20971;212712;230972;27279;319655;332110;56079;56177;65970;66922;67112;68992;70568;73710;74769;76441	Mylk;Acp5;Adora1;Atp7a;Ddr1;Capn1;Cav1;Ch25h;Esr2;Srgap2;Fut1;Gfra3;Igf2;Lama1;Matn2;Mgat3;Kitl;Plxna2;Arhgdia;Ripor2;Sfrp2;Sema4f;Sdc4;Satb2;Arhgef16;Tnfrsf12a;Podxl2;Mapk15;Astn2;Olfm1;Lima1;Rras2;Fgf22;Zfp580;Cpne3;Tubb2b;Pik3cb;Daam2	2.45% (38/1553)	0.102156	0.99	NA	NA
13			7.79	GO:0044091	membrane biogenesis	A cellular process that results in the biosynthesis of constituent macromolecules, assembly, and arrangement of constituent parts of a membrane.	4.55% (2/44)	0.161884	0.79	NA	NA	11.36% (5/44)	0.00170047	2.77	18189;19156;19298;20336;68385	Nrxn1;Psap;Pex19;Exoc4;Tlcd1
13			5.18	GO:0061919	process utilizing autophagic mechanism	A cellular process involving delivery of a portion of the cytoplasm to lysosomes or to the plant or fungal vacuole that does not involve direct transport through the endocytic or vacuolar protein sorting (Vps) pathways. This process typically leads to degradation of the cargo; however, it can also be used to deliver resident proteins, such as in the cytoplasm-to-vacuole targeting (Cvt) pathway.	3.29% (15/456)	0.00858229	2.07	100502841;11555;11938;13033;16847;192652;217893;226641;227738;332110;66795;68837;74735;74769;76932	Epg5;Adrb2;Atp2a2;Ctsd;Lepr;Wdr81;Pacs2;Atf6;Lrsam1;Mapk15;Atg10;Foxk2;Trim14;Pik3cb;Arfip2	3.51% (16/456)	0.0200396	1.7	NA	NA
13			3.65	GO:0006928	movement of cell or subcellular component	The directed, self-propelled movement of a cell or subcellular component without the involvement of an external agent such as a transporter or a pore.	2.29% (50/2186)	0.00969007	2.01	100101919;107589;11433;11539;11658;11938;11977;12121;12305;12333;12389;12642;13983;14270;14343;14587;16002;16772;17181;17309;17311;18028;18845;192662;19285;193385;20319;20320;20355;20971;211535;212712;230972;27279;319504;319655;332110;333433;56079;56177;65970;66922;67112;68524;68992;70568;70997;73710;74769;76441	Dnah7c;Mylk;Acp5;Adora1;Alcam;Atp2a2;Atp7a;Bicd1;Ddr1;Capn1;Cav1;Ch25h;Esr2;Srgap2;Fut1;Gfra3;Igf2;Lama1;Matn2;Mgat3;Kitl;Nfib;Plxna2;Arhgdia;Cavin1;Ripor2;Sfrp2;Nptn;Sema4f;Sdc4;Odad1;Satb2;Arhgef16;Tnfrsf12a;Nrcam;Podxl2;Mapk15;Gpd1l;Astn2;Olfm1;Lima1;Rras2;Fgf22;Wipf2;Zfp580;Cpne3;Spef1;Tubb2b;Pik3cb;Daam2	2.24% (49/2186)	0.195004	0.71	NA	NA
13			0.43	GO:0009987	cellular process	Any process that is carried out at the cellular level, but not necessarily restricted to a single cell. For example, cell communication occurs among more than one cell, but occurs at the cellular level.	1.92% (325/16951)	4.59035e-10	9.34	100101919;100502841;100628625;100702;102443351;103743;105988;107569;107581;107589;108958;109077;110173;110596;11428;11433;11474;11539;11555;11568;11640;11658;11768;11790;11834;11898;11906;11938;11977;12029;12036;12121;12142;12286;12305;12307;12333;12369;12380;12389;12394;12416;12445;12642;12651;12683;12724;13033;13593;13867;13983;14130;14199;14229;14270;14343;14587;14652;14683;14718;14800;14842;1…	Dnah7c;Epg5;Mir5100;Gbp6;Xntrpc;Tmem98;Espl1;Nt5c3;Col16a1;Mylk;Miga2;Ints5;Manba;Arhgef28;Aco1;Acp5;Actn3;Adora1;Adrb2;Aebp1;Akap1;Alcam;Ap1m2;Speg;Aqr;Ass1;Zfhx3;Atp2a2;Atp7a;Bcl6b;Bcat2;Bicd1;Prdm1;Cacna1a;Ddr1;Calb1;Capn1;Casp7;Cast;Cav1;Runx1;Cbx2;Ccnd3;Ch25h;Chkb;Cidea;Clcn2;Ctsd;Ebf3;Erbb3;Esr2;Fcgr2b;Fhl1;Fkbp5;Srgap2;Fut1;Gfra3;Glp1r;Gnas;Got1;Gria2;Gsx1;Gstt2;H2-Q1;Hmgcl;Hspa1b;Igf2;Itp…	2.25% (382/16951)	3.345e-08	7.48	100336;100502698;100502841;100503915;100900;101612;102294;104156;104252;106869;107045;107522;107568;107569;107607;107723;107829;109270;110078;11302;11474;11671;11737;11757;11758;11778;11785;11898;11921;12028;12050;12124;12142;12183;12367;12388;12642;12716;12850;12905;12972;13033;13162;13175;13199;13340;13636;13654;13712;13885;13983;140859;14119;14158;14297;14415;14609;14705;14731;14936;15227;1535…	Ppp1r8;Rubcn;Epg5;Smpd5;Hscb;Grwd1;Cyp4v3;Etv5;Cdc42ep2;Tnfaip8;Lars;Ece2;Wwp1;Nt5c3;Nod1;Slc12a6;Thoc5;Prr5;Pygb;Aatk;Actn3;Aldh3a2;Anp32a;Prdx3;Prdx6;Ap3s2;Apbb1;Ass1;Atoh1;Bax;Bcl2l2;Bik;Prdm1;Bpgm;Casp3;Ctnnd1;Ch25h;Ckmt1;Coq7;Cradd;Cryz;Ctsd;Slc6a3;Dclk1;Ddn;Slc29a2;Efna1;Egr2;Elk1;Esd;Esr2;Nek8;Fbn2;Fer;Fxn;Gad1;Gja1;Bscl2;Gpaa1;Gys1;Foxf1;Hmgcl;Hmox1;Hmx3;Hoxa11os;Icam5;Igf2;Irf2;Kcnj2;Kcn…
13			8.55	GO:0048521	negative regulation of behavior	Any process that stops, prevents, or reduces the frequency, rate or extent of behavior, the internally coordinated responses (actions or inactions) of whole living organisms (individuals or groups) to internal or external stimuli.	13.79% (4/29)	0.0012127	2.92	11539;13983;16847;56183	Adora1;Esr2;Lepr;Nmu	3.45% (1/29)	0.4398	0.36	NA	NA
13			9.25	GO:2000252	negative regulation of feeding behavior	NA	18.75% (3/16)	0.00207799	2.68	13983;16847;56183	Esr2;Lepr;Nmu	6.25% (1/16)	0.273568	0.56	NA	NA
13			9.05	GO:0033004	negative regulation of mast cell activation	Any process that stops, prevents, or reduces the frequency, rate, or extent of mast cell activation.	0% (0/13)	1	0	NA	NA	23.08% (3/13)	0.00189416	2.72	14158;15227;15368	Fer;Foxf1;Hmox1
13			8.53	GO:0048147	negative regulation of fibroblast proliferation	Any process that stops, prevents, or reduces the frequency, rate or extent of multiplication or reproduction of fibroblast cells.	0% (0/35)	1	0	NA	NA	11.43% (4/35)	0.00486094	2.31	12028;218271;22059;22084	Bax;B4galt7;Trp53;Tsc2
13			2.35	GO:0048519	negative regulation of biological process	Any process that stops, prevents, or reduces the frequency, rate or extent of a biological process. Biological processes are regulated by many means; examples include the control of gene expression, protein modification or interaction with a protein or substrate molecule.	2.16% (121/5611)	0.000354264	3.45	103743;11433;11474;11539;11555;11568;11640;11898;11906;11938;11977;12029;12121;12142;12286;12305;12333;12380;12389;12394;12416;12445;12642;12683;13867;13983;14130;14199;14270;14652;14683;14718;15511;16002;16440;16847;17309;17311;17855;17872;18028;18091;18260;18483;18514;18616;18845;19223;19266;192662;19267;193385;194952;19735;20319;20320;20355;20416;209011;209630;20971;212712;21413;217011;217069;…	Tmem98;Acp5;Actn3;Adora1;Adrb2;Aebp1;Akap1;Ass1;Zfhx3;Atp2a2;Atp7a;Bcl6b;Bicd1;Prdm1;Cacna1a;Ddr1;Capn1;Cast;Cav1;Runx1;Cbx2;Ccnd3;Ch25h;Cidea;Erbb3;Esr2;Fcgr2b;Fhl1;Srgap2;Glp1r;Gnas;Got1;Hspa1b;Igf2;Itpr3;Lepr;Mgat3;Kitl;Mvk;Ppp1r15a;Nfib;Nkx2-5;Ocln;Palm;Pbx1;Peg3;Plxna2;Ptgis;Ptprd;Arhgdia;Ptpre;Ripor2;Jmjd4;Rgs2;Sfrp2;Nptn;Sema4f;Shc1;Sirt7;Frmd4a;Sdc4;Satb2;Tcf4;Nle1;Trim25;Trpc5;Ttll12;Tre…	2.5% (140/5611)	0.00100377	3	100336;100502698;104156;107568;107829;11302;11474;11757;11785;11898;11921;12028;12050;12142;12367;12388;12642;12716;12850;12905;13162;13175;13636;13983;14119;14158;14297;14609;14705;15227;15368;16002;16535;16599;16971;17035;170787;17314;18103;18189;18442;19156;19205;19415;19698;20193;20259;20346;20429;20678;20714;20877;209200;209378;212712;21354;21413;216134;21672;218271;21937;22059;22084;22158;2…	Ppp1r8;Rubcn;Etv5;Wwp1;Thoc5;Aatk;Actn3;Prdx3;Apbb1;Ass1;Atoh1;Bax;Bcl2l2;Prdm1;Casp3;Ctnnd1;Ch25h;Ckmt1;Coq7;Cradd;Slc6a3;Dclk1;Efna1;Esr2;Fbn2;Fer;Fxn;Gja1;Bscl2;Foxf1;Hmox1;Igf2;Kcnq1;Klf3;Lrp1;Lxn;Hdac10;Mgmt;Nme2;Nrxn1;P2ry2;Psap;Ptbp1;Rasal1;Relb;S100a1;Scin;Sema3a;Shox2;Sox5;Serpina3k;Aurkb;Dtx3l;Itih5;Satb2;Tap1;Tcf4;Pdxk;Prdx2;B4galt7;Tnfrsf1a;Trp53;Tsc2;Tulp3;Tyms;Vipr2;Trpv2;Wnt3;Traf7…
13			2.58	GO:0048523	negative regulation of cellular process	Any process that stops, prevents, or reduces the frequency, rate or extent of a cellular process, any of those that are carried out at the cellular level, but are not necessarily restricted to a single cell. For example, cell communication occurs among more than one cell, but occurs at the cellular level.	2.14% (108/5035)	0.00105292	2.98	103743;11433;11474;11539;11555;11568;11640;11898;11906;11977;12029;12121;12142;12286;12305;12333;12380;12389;12394;12416;12445;12642;12683;13867;13983;14130;14199;14270;14652;15511;16002;16440;16847;17309;17311;17855;17872;18028;18091;18260;18483;18514;18616;18845;19223;19266;192662;19267;193385;19735;20319;20355;20416;209011;209630;20971;212712;21413;217011;22067;223723;224829;22658;227358;22773…	Tmem98;Acp5;Actn3;Adora1;Adrb2;Aebp1;Akap1;Ass1;Zfhx3;Atp7a;Bcl6b;Bicd1;Prdm1;Cacna1a;Ddr1;Capn1;Cast;Cav1;Runx1;Cbx2;Ccnd3;Ch25h;Cidea;Erbb3;Esr2;Fcgr2b;Fhl1;Srgap2;Glp1r;Hspa1b;Igf2;Itpr3;Lepr;Mgat3;Kitl;Mvk;Ppp1r15a;Nfib;Nkx2-5;Ocln;Palm;Pbx1;Peg3;Plxna2;Ptgis;Ptprd;Arhgdia;Ptpre;Ripor2;Rgs2;Sfrp2;Sema4f;Shc1;Sirt7;Frmd4a;Sdc4;Satb2;Tcf4;Nle1;Trpc5;Ttll12;Trerf1;Pcgf2;Erfe;Lrsam1;Slc35c1;Inpp4…	2.52% (127/5035)	0.00127135	2.9	100336;100502698;104156;107568;107829;11302;11474;11757;11785;11898;11921;12028;12050;12142;12367;12388;12642;12716;12850;12905;13175;13636;13983;14119;14158;14297;14609;15227;15368;16002;16535;16599;16971;17035;170787;17314;18103;18189;19156;19205;19415;19698;20193;20259;20346;20429;20678;20714;20877;209200;209378;212712;21354;21413;216134;21672;218271;21937;22059;22084;22158;22171;22355;22368;2…	Ppp1r8;Rubcn;Etv5;Wwp1;Thoc5;Aatk;Actn3;Prdx3;Apbb1;Ass1;Atoh1;Bax;Bcl2l2;Prdm1;Casp3;Ctnnd1;Ch25h;Ckmt1;Coq7;Cradd;Dclk1;Efna1;Esr2;Fbn2;Fer;Fxn;Gja1;Foxf1;Hmox1;Igf2;Kcnq1;Klf3;Lrp1;Lxn;Hdac10;Mgmt;Nme2;Nrxn1;Psap;Ptbp1;Rasal1;Relb;S100a1;Scin;Sema3a;Shox2;Sox5;Serpina3k;Aurkb;Dtx3l;Itih5;Satb2;Tap1;Tcf4;Pdxk;Prdx2;B4galt7;Tnfrsf1a;Trp53;Tsc2;Tulp3;Tyms;Vipr2;Trpv2;Wnt3;Traf7;Zfp81;Onecut2;Rorb…
13			5.7	GO:0032102	negative regulation of response to external stimulus	Any process that stops, prevents, or reduces the frequency, rate or extent of a response to an external stimulus.	2.83% (12/424)	0.0475319	1.32	NA	NA	4.01% (17/424)	0.00490161	2.31	12142;13162;14609;15227;16002;18189;20346;21354;21672;21937;22415;23959;268860;50929;53322;54131;547253	Prdm1;Slc6a3;Gja1;Foxf1;Igf2;Nrxn1;Sema3a;Tap1;Prdx2;Tnfrsf1a;Wnt3;Nt5e;Abat;Il22;Nucb2;Irf3;Parp14
13			3.99	GO:0048585	negative regulation of response to stimulus	Any process that stops, prevents, or reduces the frequency, rate or extent of a response to a stimulus. Response to stimulus is a change in state or activity of a cell or an organism (in terms of movement, secretion, enzyme production, gene expression, etc.) as a result of a stimulus.	2.4% (41/1705)	0.00860037	2.07	11433;11474;11539;11555;12121;12142;12333;12389;12683;13867;13983;14130;15511;16002;17855;17872;18091;18483;19223;19266;19267;193385;19735;20319;20355;217011;223723;22658;228368;26569;268860;27280;319478;333433;52538;54131;67603;68082;74769;74919;75736	Acp5;Actn3;Adora1;Adrb2;Bicd1;Prdm1;Capn1;Cav1;Cidea;Erbb3;Esr2;Fcgr2b;Hspa1b;Igf2;Mvk;Ppp1r15a;Nkx2-5;Palm;Ptgis;Ptprd;Ptpre;Ripor2;Rgs2;Sfrp2;Sema4f;Nle1;Ttll12;Pcgf2;Slc35c1;Slc27a4;Abat;Phlda3;Cxxc4;Gpd1l;Acaa2;Irf3;Dusp6;Dusp19;Pik3cb;Slc35f6;Bcl2l12	3.17% (54/1705)	0.000407067	3.39	107829;11474;12028;12050;12142;12388;13162;13636;13983;14119;14158;14297;14609;15227;15368;16002;16971;18189;19156;19415;20346;21354;21672;21937;22059;22084;22158;22415;225631;232339;23959;243910;268860;27403;382985;50880;50883;50929;53322;54131;547253;66073;668303;67767;68082;69068;69550;69660;70300;71732;74919;75736;75747;76041	Thoc5;Actn3;Bax;Bcl2l2;Prdm1;Ctnnd1;Slc6a3;Efna1;Esr2;Fbn2;Fer;Fxn;Gja1;Foxf1;Hmox1;Igf2;Lrp1;Nrxn1;Psap;Rasal1;Sema3a;Tap1;Prdx2;Tnfrsf1a;Trp53;Tsc2;Tulp3;Wnt3;Onecut2;Ankrd26;Nt5e;Nfkbid;Abat;Abca7;Rrm2b;Scly;Chek2;Il22;Nucb2;Irf3;Parp14;Txndc12;Kif26a;Jagn1;Dusp19;Tcim;Bst2;Tmbim1;Fuz;Vps11;Slc35f6;Bcl2l12;Sesn3;Ccdc125
13			2.83	GO:0048583	regulation of response to stimulus	Any process that modulates the frequency, rate or extent of a response to a stimulus. Response to stimulus is a change in state or activity of a cell or an organism (in terms of movement, secretion, enzyme production, gene expression, etc.) as a result of a stimulus.	1.95% (81/4156)	0.047794	1.32	NA	NA	2.48% (103/4156)	0.0071634	2.14	107045;107607;107829;109270;11474;11785;12028;12050;12124;12142;12388;12905;13162;13636;13983;140859;14119;14158;14297;14609;14705;15227;15368;16002;16897;16971;170787;17314;18189;19156;19205;19415;20336;20346;20429;20528;209200;21354;21413;21672;216853;21937;22059;22084;22158;224045;22415;224619;225631;228812;232339;233405;237313;23959;243362;243910;268860;268933;270190;27403;29867;320207;320924…	Lars;Nod1;Thoc5;Prr5;Actn3;Apbb1;Bax;Bcl2l2;Bik;Prdm1;Ctnnd1;Cradd;Slc6a3;Efna1;Esr2;Nek8;Fbn2;Fer;Fxn;Gja1;Bscl2;Foxf1;Hmox1;Igf2;Llgl1;Lrp1;Hdac10;Mgmt;Nrxn1;Psap;Ptbp1;Rasal1;Exoc4;Sema3a;Shox2;Slc2a4;Dtx3l;Tap1;Tcf4;Prdx2;Wrap53;Tnfrsf1a;Trp53;Tsc2;Tulp3;Eif2b5;Wnt3;Traf7;Onecut2;Pigu;Ankrd26;Vps33b;Il20ra;Nt5e;Stard13;Nfkbid;Abat;Wdr24;Ephb1;Abca7;Cabp1;Pik3r5;Ccbe1;Lgr6;Rrm2b;Scly;Chek2;Il2…
13			8.23	GO:1905898	positive regulation of response to endoplasmic reticulum stress	NA	11.43% (4/35)	0.00247514	2.61	12389;14130;17872;226641	Cav1;Fcgr2b;Ppp1r15a;Atf6	2.86% (1/35)	0.503139	0.3	NA	NA
13			1.97	GO:0048518	positive regulation of biological process	Any process that activates or increases the frequency, rate or extent of a biological process. Biological processes are regulated by many means; examples include the control of gene expression, protein modification or interaction with a protein or substrate molecule.	2.06% (136/6607)	0.000981837	3.01	107581;107589;11433;11474;11539;11555;11898;11906;11977;12121;12142;12305;12307;12333;12369;12389;12394;12445;12683;13033;13593;13867;13983;14130;14199;14343;14652;14683;14718;14800;14842;15006;15511;16002;16440;16847;170439;17309;17311;17872;18028;18091;18260;18483;18514;18616;18845;19223;19266;19285;193385;194952;19735;20319;20320;20355;20416;20614;209011;209630;20971;20979;211151;212712;213696…	Col16a1;Mylk;Acp5;Actn3;Adora1;Adrb2;Ass1;Zfhx3;Atp7a;Bicd1;Prdm1;Ddr1;Calb1;Capn1;Casp7;Cav1;Runx1;Ccnd3;Cidea;Ctsd;Ebf3;Erbb3;Esr2;Fcgr2b;Fhl1;Fut1;Glp1r;Gnas;Got1;Gria2;Gsx1;H2-Q1;Hspa1b;Igf2;Itpr3;Lepr;Elovl6;Mgat3;Kitl;Ppp1r15a;Nfib;Nkx2-5;Ocln;Palm;Pbx1;Peg3;Plxna2;Ptgis;Ptprd;Cavin1;Ripor2;Jmjd4;Rgs2;Sfrp2;Nptn;Sema4f;Shc1;Snap25;Sirt7;Frmd4a;Sdc4;Syt1;Churc1;Satb2;Duoxa1;Tcf4;Tet2;Med16;W…	2.41% (159/6607)	0.00197969	2.7	104156;104252;106869;107045;107568;107607;107829;109270;11474;11757;11758;11785;11898;11921;12028;12124;12142;12367;12388;12850;12905;13033;13162;13199;13636;13654;13712;13983;14119;14158;14297;14609;14705;15227;15368;16002;16363;16518;16535;16971;170787;17279;17314;18003;18103;18189;18424;18442;19125;19156;19186;19205;19415;19698;20193;20259;20336;20346;20429;20528;20614;20678;208647;20877;20920…	Etv5;Cdc42ep2;Tnfaip8;Lars;Wwp1;Nod1;Thoc5;Prr5;Actn3;Prdx3;Prdx6;Apbb1;Ass1;Atoh1;Bax;Bik;Prdm1;Casp3;Ctnnd1;Coq7;Cradd;Ctsd;Slc6a3;Ddn;Efna1;Egr2;Elk1;Esr2;Fbn2;Fer;Fxn;Gja1;Bscl2;Foxf1;Hmox1;Igf2;Irf2;Kcnj2;Kcnq1;Lrp1;Hdac10;Melk;Mgmt;Nedd9;Nme2;Nrxn1;Otx2;P2ry2;Prodh;Psap;Psme1;Ptbp1;Rasal1;Relb;S100a1;Scin;Exoc4;Sema3a;Shox2;Slc2a4;Snap25;Sox5;Creb3l2;Aurkb;Dtx3l;Satb2;Tcf4;Med16;Prdx2;Tead3…
13			2.22	GO:0048522	positive regulation of cellular process	Any process that activates or increases the frequency, rate or extent of a cellular process, any of those that are carried out at the cellular level, but are not necessarily restricted to a single cell. For example, cell communication occurs among more than one cell, but occurs at the cellular level.	2.05% (124/6044)	0.00215654	2.67	107581;107589;11433;11474;11539;11555;11898;11906;11977;12121;12142;12305;12307;12333;12369;12389;12394;12445;13033;13593;13867;13983;14130;14343;14652;14683;14718;14800;14842;15006;15511;16002;16440;16847;17309;17311;17872;18028;18091;18260;18483;18514;18616;18845;19223;19266;19285;193385;194952;19735;20319;20320;20355;20416;20614;209011;209630;20971;20979;211151;212712;213696;21413;214133;21615…	Col16a1;Mylk;Acp5;Actn3;Adora1;Adrb2;Ass1;Zfhx3;Atp7a;Bicd1;Prdm1;Ddr1;Calb1;Capn1;Casp7;Cav1;Runx1;Ccnd3;Ctsd;Ebf3;Erbb3;Esr2;Fcgr2b;Fut1;Glp1r;Gnas;Got1;Gria2;Gsx1;H2-Q1;Hspa1b;Igf2;Itpr3;Lepr;Mgat3;Kitl;Ppp1r15a;Nfib;Nkx2-5;Ocln;Palm;Pbx1;Peg3;Plxna2;Ptgis;Ptprd;Cavin1;Ripor2;Jmjd4;Rgs2;Sfrp2;Nptn;Sema4f;Shc1;Snap25;Sirt7;Frmd4a;Sdc4;Syt1;Churc1;Satb2;Duoxa1;Tcf4;Tet2;Med16;Wrap53;Nle1;Trim25;…	2.5% (151/6044)	0.000527362	3.28	104156;104252;106869;107045;107607;107829;109270;11474;11757;11758;11785;11898;11921;12028;12124;12142;12367;12388;12850;12905;13033;13199;13636;13654;13712;13983;14119;14158;14297;14609;15227;15368;16002;16363;16518;16535;16971;170787;17279;17314;18003;18103;18189;18424;18442;19125;19156;19186;19205;19415;19698;20193;20259;20336;20346;20429;20528;20614;20678;208647;20877;209200;212712;21413;2161…	Etv5;Cdc42ep2;Tnfaip8;Lars;Nod1;Thoc5;Prr5;Actn3;Prdx3;Prdx6;Apbb1;Ass1;Atoh1;Bax;Bik;Prdm1;Casp3;Ctnnd1;Coq7;Cradd;Ctsd;Ddn;Efna1;Egr2;Elk1;Esr2;Fbn2;Fer;Fxn;Gja1;Foxf1;Hmox1;Igf2;Irf2;Kcnj2;Kcnq1;Lrp1;Hdac10;Melk;Mgmt;Nedd9;Nme2;Nrxn1;Otx2;P2ry2;Prodh;Psap;Psme1;Ptbp1;Rasal1;Relb;S100a1;Scin;Exoc4;Sema3a;Shox2;Slc2a4;Snap25;Sox5;Creb3l2;Aurkb;Dtx3l;Satb2;Tcf4;Med16;Prdx2;Tead3;Wrap53;Tnfrsf1a;T…
13			7.23	GO:0046849	bone remodeling	The continuous turnover of bone matrix and mineral that involves first, an increase in resorption (osteoclastic activity) and later, reactive bone formation (osteoblastic activity). The process of bone remodeling takes place in the adult skeleton at discrete foci. The process ensures the mechanical integrity of the skeleton throughout life and plays an important role in calcium homeostasis. An im…	5.71% (6/105)	0.00764594	2.12	11433;11555;16847;234515;27273;71982	Acp5;Adrb2;Lepr;Inpp4b;Pdk4;Snx10	1.9% (2/105)	0.617603	0.21	NA	NA
13			6.61	GO:0048771	tissue remodeling	The reorganization or renovation of existing tissues. This process can either change the characteristics of a tissue such as in blood vessel remodeling, or result in the dynamic equilibrium of a tissue such as in bone remodeling.	4.37% (9/206)	0.00706063	2.15	11433;11555;11977;12333;12389;16847;234515;27273;71982	Acp5;Adrb2;Atp7a;Capn1;Cav1;Lepr;Inpp4b;Pdk4;Snx10	2.91% (6/206)	0.224168	0.65	NA	NA
13			2.93	GO:0051239	regulation of multicellular organismal process	Any process that modulates the frequency, rate or extent of a multicellular organismal process, the processes pertinent to the function of a multicellular organism above the cellular level; includes the integrated processes of tissues and organs.	2.14% (75/3508)	0.00814447	2.09	103743;11433;11474;11539;11555;11640;11906;11938;12029;12142;12286;12389;12394;12683;13867;14130;14270;14343;14652;14683;15511;16002;16772;16847;170439;17311;17872;18028;18091;18483;18514;18845;19223;19266;192775;19735;20319;20320;20355;20416;20614;20979;213696;21413;22067;22409;234515;268396;268860;26901;27273;27279;29856;319504;329628;333433;338362;387609;53314;53791;54131;56177;56183;57265;659…	Tmem98;Acp5;Actn3;Adora1;Adrb2;Akap1;Zfhx3;Atp2a2;Bcl6b;Prdm1;Cacna1a;Cav1;Runx1;Cidea;Erbb3;Fcgr2b;Srgap2;Fut1;Glp1r;Gnas;Hspa1b;Igf2;Lama1;Lepr;Elovl6;Kitl;Ppp1r15a;Nfib;Nkx2-5;Palm;Pbx1;Plxna2;Ptgis;Ptprd;Kcnh6;Rgs2;Sfrp2;Nptn;Sema4f;Shc1;Snap25;Syt1;Duoxa1;Tcf4;Trpc5;Wnt10a;Inpp4b;Sh3pxd2b;Abat;Ss18l2;Pdk4;Tnfrsf12a;Smtn;Nrcam;Fat4;Gpd1l;Ust;Zhx2;Batf;Tlr5;Irf3;Olfm1;Nmu;Fzd2;Clstn1;Dusp6;Zfp…	2.19% (77/3508)	0.172466	0.76	NA	NA
13			7.46	GO:0034103	regulation of tissue remodeling	Any process that modulates the frequency, rate, or extent of tissue remodeling.	3.37% (3/89)	0.178921	0.75	NA	NA	6.74% (6/89)	0.0084516	2.07	12028;14609;16971;22059;237313;69660	Bax;Gja1;Lrp1;Trp53;Il20ra;Tmbim1
13			8.15	GO:0032768	regulation of monooxygenase activity	Any process that modulates the activity of a monooxygenase.	8.7% (4/46)	0.00670215	2.17	11977;12389;66394;74769	Atp7a;Cav1;Nosip;Pik3cb	4.35% (2/46)	0.230593	0.64	NA	NA
13			4.09	GO:0050790	regulation of catalytic activity	Any process that modulates the activity of an enzyme.	2.09% (38/1822)	0.0731287	1.14	NA	NA	2.85% (52/1822)	0.00479283	2.32	100502698;107045;107607;11757;12028;12367;12905;13033;13636;14297;14705;16002;16912;16913;16971;17035;17314;18003;18189;19156;19186;19415;20193;20714;20877;209200;209378;216853;22059;22084;22355;23922;26889;270190;320207;382051;52163;57915;59032;66437;66971;68067;68082;68510;69068;69660;69726;72106;75736;76041;76573;80982	Rubcn;Lars;Nod1;Prdx3;Bax;Casp3;Cradd;Ctsd;Efna1;Fxn;Bscl2;Igf2;Psmb9;Psmb8;Lrp1;Lxn;Mgmt;Nedd9;Nrxn1;Psap;Psme1;Rasal1;S100a1;Serpina3k;Aurkb;Dtx3l;Itih5;Wrap53;Trp53;Tsc2;Vipr2;Jtb;Cln8;Ephb1;Pik3r5;Pdp2;Camk1;Tbc1d1;Ppp2r3c;Fis1;Cdk5rap1;Mrnip;Dusp19;Ints1;Tcim;Tmbim1;Smyd3;Jmjd8;Bcl2l12;Ccdc125;Spatc1l;Cemip
13			3.65	GO:0065009	regulation of molecular function	Any process that modulates the frequency, rate or extent of a molecular function, an elemental biological activity occurring at the molecular level, such as catalysis or binding.	2.16% (55/2542)	0.0189448	1.72	NA	NA	2.64% (67/2542)	0.0087901	2.06	100502698;107045;107607;11757;12028;12367;12716;12905;13033;13636;13983;14158;14297;14609;14705;15368;16002;16535;16912;16913;16971;17035;17314;18003;18189;19156;19186;19298;19415;20193;20714;20877;209200;209378;21672;216853;22059;22084;22355;23922;243910;26889;270190;29867;320207;382051;52163;545622;56530;57915;59032;64138;66437;66568;66971;68067;68082;68510;69068;69660;69726;72106;75736;76041;7…	Rubcn;Lars;Nod1;Prdx3;Bax;Casp3;Ckmt1;Cradd;Ctsd;Efna1;Esr2;Fer;Fxn;Gja1;Bscl2;Hmox1;Igf2;Kcnq1;Psmb9;Psmb8;Lrp1;Lxn;Mgmt;Nedd9;Nrxn1;Psap;Psme1;Pex19;Rasal1;S100a1;Serpina3k;Aurkb;Dtx3l;Itih5;Prdx2;Wrap53;Trp53;Tsc2;Vipr2;Jtb;Nfkbid;Cln8;Ephb1;Cabp1;Pik3r5;Pdp2;Camk1;Ptpn3;Cnpy2;Tbc1d1;Ppp2r3c;Ctsz;Fis1;Rwdd3;Cdk5rap1;Mrnip;Dusp19;Ints1;Tcim;Tmbim1;Smyd3;Jmjd8;Bcl2l12;Ccdc125;Spatc1l;Cemip;Cacng8
13			6.78	GO:0001659	temperature homeostasis	A homeostatic process in which an organism modulates its internal body temperature.	5.35% (10/187)	0.00106584	2.97	11474;11539;11555;12389;12683;14683;16847;170439;268860;56183	Actn3;Adora1;Adrb2;Cav1;Cidea;Gnas;Lepr;Elovl6;Abat;Nmu	2.67% (5/187)	0.311376	0.51	NA	NA
13			8.81	GO:0031649	heat generation	Any homeostatic process in which an organism produces heat, thereby raising its internal temperature.	13.04% (3/23)	0.00603829	2.22	11555;268860;56183	Adrb2;Abat;Nmu	4.35% (1/23)	0.368408	0.43	NA	NA
13			5.45	GO:0001505	regulation of neurotransmitter levels	Any process that modulates levels of neurotransmitter.	4.08% (16/392)	0.000801937	3.1	11433;11555;11898;11938;11977;12286;12389;19223;19735;20538;20614;20979;268860;53791;59012;64051	Acp5;Adrb2;Ass1;Atp2a2;Atp7a;Cacna1a;Cav1;Ptgis;Rgs2;Slc6a2;Snap25;Syt1;Abat;Tlr5;Moxd1;Sv2a	2.81% (11/392)	0.156173	0.81	NA	NA
13			2.79	GO:0065008	regulation of biological quality	Any process that modulates a qualitative or quantitative trait of a biological quality. A biological quality is a measurable attribute of an organism or part of an organism, such as size, mass, shape, color, etc.	2.38% (104/4363)	2.27479e-05	4.64	102443351;11428;114301;11433;11474;11539;11555;11898;11938;11977;12036;12286;12305;12307;12333;12389;12394;12683;12724;13983;14130;14199;14652;14683;14718;15511;16002;16440;16470;16847;170439;170738;17311;17872;18260;18483;18845;19223;192287;192652;19266;192662;192775;19735;20320;20355;20416;20538;20614;20979;210741;213696;214133;216853;217011;217893;22067;227358;227580;229512;234515;235283;26030…	Xntrpc;Aco1;Palmd;Acp5;Actn3;Adora1;Adrb2;Ass1;Atp2a2;Atp7a;Bcat2;Cacna1a;Ddr1;Calb1;Capn1;Cav1;Runx1;Cidea;Clcn2;Esr2;Fcgr2b;Fhl1;Glp1r;Gnas;Got1;Hspa1b;Igf2;Itpr3;Ush1g;Lepr;Elovl6;Kcnh7;Kitl;Ppp1r15a;Ocln;Palm;Plxna2;Ptgis;Slc25a36;Wdr81;Ptprd;Arhgdia;Kcnh6;Rgs2;Nptn;Sema4f;Shc1;Slc6a2;Snap25;Syt1;Kcnk12;Duoxa1;Tet2;Wrap53;Nle1;Pacs2;Trpc5;Erfe;C1ql3;Smg5;Inpp4b;Gramd1b;Gga3;Slc27a4;Sh3pxd2b;A…	2.02% (88/4363)	0.435784	0.36	NA	NA
13			6.65	GO:0042133	neurotransmitter metabolic process	The chemical reactions and pathways involving neurotransmitters, any of a group of substances that are released on excitation from the axon terminal of a presynaptic neuron of the central or peripheral nervous system and travel across the synaptic cleft to either excite or inhibit the target cell.	5.03% (8/159)	0.00476589	2.32	11433;11898;11977;12389;19223;268860;53791;59012	Acp5;Ass1;Atp7a;Cav1;Ptgis;Abat;Tlr5;Moxd1	2.52% (4/159)	0.385311	0.41	NA	NA
13			7.08	GO:0042136	neurotransmitter biosynthetic process	The chemical reactions and pathways resulting in the formation of any of a group of substances that are released on excitation from the axon terminal of a presynaptic neuron of the central or peripheral nervous system and travel across the synaptic cleft to either excite or inhibit the target cell.	6.14% (7/114)	0.00273573	2.56	11433;11898;12389;19223;268860;53791;59012	Acp5;Ass1;Cav1;Ptgis;Abat;Tlr5;Moxd1	3.51% (4/114)	0.189446	0.72	NA	NA
14		System process	7.73	GO:0045776	negative regulation of blood pressure	Any process in which the force of blood traveling through the circulatory system is decreased.	9.09% (6/66)	0.000733141	3.13	11539;11555;14652;14683;268860;29856	Adora1;Adrb2;Glp1r;Gnas;Abat;Smtn	3.03% (2/66)	0.376126	0.42	NA	NA
14			4.92	GO:0003013	circulatory system process	A organ system process carried out by any of the organs or tissues of the circulatory system. The circulatory system is an organ system that moves extracellular fluids to and from tissue within a multicellular organism.	3.57% (20/560)	0.00100002	3	11539;11555;11938;12333;12389;13983;14652;14683;18091;18260;192775;19735;20416;26569;268860;29856;333433;56089;56183;80297	Adora1;Adrb2;Atp2a2;Capn1;Cav1;Esr2;Glp1r;Gnas;Nkx2-5;Ocln;Kcnh6;Rgs2;Shc1;Slc27a4;Abat;Smtn;Gpd1l;Ramp3;Nmu;Sptbn4	2.14% (12/560)	0.429447	0.37	NA	NA
14			5.65	GO:0003015	heart process	A circulatory system process carried out by the heart. The heart is a hollow, muscular organ, which, by contracting rhythmically, keeps up the circulation of the blood. The heart is a hollow, muscular organ, which, by contracting rhythmically, keeps up the circulation of the blood.	5.26% (13/247)	0.000233154	3.63	11539;11555;11938;12389;14652;18091;192775;19735;29856;333433;56089;56183;80297	Adora1;Adrb2;Atp2a2;Cav1;Glp1r;Nkx2-5;Kcnh6;Rgs2;Smtn;Gpd1l;Ramp3;Nmu;Sptbn4	2.83% (7/247)	0.218474	0.66	NA	NA
14			4.96	GO:0008015	blood circulation	The flow of blood through the body of an animal, enabling the transport of nutrients to the tissues and the removal of waste products.	3.4% (18/530)	0.00301894	2.52	11539;11555;11938;12333;12389;13983;14652;14683;18091;18260;192775;19735;20416;268860;29856;333433;56183;80297	Adora1;Adrb2;Atp2a2;Capn1;Cav1;Esr2;Glp1r;Gnas;Nkx2-5;Ocln;Kcnh6;Rgs2;Shc1;Abat;Smtn;Gpd1l;Nmu;Sptbn4	2.08% (11/530)	0.477881	0.32	NA	NA
14			5.69	GO:0060047	heart contraction	The multicellular organismal process in which the heart decreases in volume in a characteristic way to propel blood through the body.	5.04% (12/238)	0.000589494	3.23	11539;11555;11938;12389;14652;18091;192775;19735;29856;333433;56183;80297	Adora1;Adrb2;Atp2a2;Cav1;Glp1r;Nkx2-5;Kcnh6;Rgs2;Smtn;Gpd1l;Nmu;Sptbn4	2.94% (7/238)	0.193411	0.71	NA	NA
14			7.43	GO:0055117	regulation of cardiac muscle contraction	Any process that modulates the frequency, rate or extent of cardiac muscle contraction.	8.11% (6/74)	0.00134015	2.87	11539;11938;12389;18091;19735;29856	Adora1;Atp2a2;Cav1;Nkx2-5;Rgs2;Smtn	4.05% (3/74)	0.180362	0.74	NA	NA
14			6.65	GO:0060048	cardiac muscle contraction	Muscle contraction of cardiac muscle tissue.	5.3% (7/132)	0.00611403	2.21	11539;11938;12389;18091;19735;29856;333433	Adora1;Atp2a2;Cav1;Nkx2-5;Rgs2;Smtn;Gpd1l	2.27% (3/132)	0.485979	0.31	NA	NA
14			5.74	GO:1903522	regulation of blood circulation	NA	4.83% (13/269)	0.000526892	3.28	11539;11555;11938;12389;14652;18091;192775;19735;20416;29856;333433;56183;80297	Adora1;Adrb2;Atp2a2;Cav1;Glp1r;Nkx2-5;Kcnh6;Rgs2;Shc1;Smtn;Gpd1l;Nmu;Sptbn4	2.6% (7/269)	0.283978	0.55	NA	NA
14			7.24	GO:1903524	positive regulation of blood circulation	NA	8.25% (8/97)	0.000194213	3.71	11555;12389;14652;18091;19735;20416;29856;56183	Adrb2;Cav1;Glp1r;Nkx2-5;Rgs2;Shc1;Smtn;Nmu	3.09% (3/97)	0.300788	0.52	NA	NA
14			5.95	GO:0008016	regulation of heart contraction	Any process that modulates the frequency, rate or extent of heart contraction. Heart contraction is the process in which the heart decreases in volume in a characteristic way to propel blood through the body.	6.06% (12/198)	0.000109289	3.96	11539;11555;11938;12389;14652;18091;192775;19735;29856;333433;56183;80297	Adora1;Adrb2;Atp2a2;Cav1;Glp1r;Nkx2-5;Kcnh6;Rgs2;Smtn;Gpd1l;Nmu;Sptbn4	3.54% (7/198)	0.098971	1	NA	NA
14			7.93	GO:0045823	positive regulation of heart contraction	Any process that activates or increases the frequency, rate or extent of heart contraction.	13.04% (6/46)	9.94251e-05	4	11555;14652;18091;19735;29856;56183	Adrb2;Glp1r;Nkx2-5;Rgs2;Smtn;Nmu	4.35% (2/46)	0.230593	0.64	NA	NA
14			8.29	GO:0090075	relaxation of muscle	A process in which the extent of muscle contraction is reduced. Muscle relaxation can involve a number of processes including the removal of calcium from the cytoplasm to the sarcoplasmic reticulum lumen through the action of Ca2+ ATPases. In some muscles, calcium-independent pathways also play a role in muscle relaxation by decreasing the phosphorylation state of myosin light chain.	11.11% (4/36)	0.00274906	2.56	11474;11539;11938;19735	Actn3;Adora1;Atp2a2;Rgs2	5.56% (2/36)	0.158787	0.8	NA	NA
14			6.34	GO:0006941	striated muscle contraction	A process in which force is generated within striated muscle tissue, resulting in the shortening of the muscle. Force generation involves a chemo-mechanical energy conversion step that is carried out by the actin/myosin complex activity, which generates force through ATP hydrolysis. Striated muscle is a type of muscle in which the repeating units (sarcomeres) of the contractile myofibrils are arr…	5.2% (9/173)	0.00225757	2.65	11474;11539;11555;11938;12389;18091;19735;29856;333433	Actn3;Adora1;Adrb2;Atp2a2;Cav1;Nkx2-5;Rgs2;Smtn;Gpd1l	2.89% (5/173)	0.258083	0.59	NA	NA
14			5.72	GO:0006936	muscle contraction	A process in which force is generated within muscle tissue, resulting in a change in muscle geometry. Force generation involves a chemo-mechanical energy conversion step that is carried out by the actin/myosin complex activity, which generates force through ATP hydrolysis.	4.15% (13/313)	0.00207783	2.68	107589;11474;11539;11555;11938;12389;18091;19735;20416;268860;29856;333433;56183	Mylk;Actn3;Adora1;Adrb2;Atp2a2;Cav1;Nkx2-5;Rgs2;Shc1;Abat;Smtn;Gpd1l;Nmu	2.24% (7/313)	0.424397	0.37	NA	NA
14			6.92	GO:0006939	smooth muscle contraction	A process in which force is generated within smooth muscle tissue, resulting in a change in muscle geometry. Force generation involves a chemo-mechanical energy conversion step that is carried out by the actin/myosin complex activity, which generates force through ATP hydrolysis. Smooth muscle differs from striated muscle in the much higher actin/myosin ratio, the absence of conspicuous sarcomere…	6.78% (8/118)	0.000731054	3.14	107589;11539;11555;12389;19735;20416;268860;56183	Mylk;Adora1;Adrb2;Cav1;Rgs2;Shc1;Abat;Nmu	1.69% (2/118)	0.68047	0.17	NA	NA
14			8.88	GO:0045986	negative regulation of smooth muscle contraction	Any process that stops, prevents, or reduces the frequency, rate or extent of smooth muscle contraction.	15% (3/20)	0.00403022	2.39	11539;11555;19735	Adora1;Adrb2;Rgs2	0% (0/20)	1	0	NA	NA
14			6.07	GO:0090257	regulation of muscle system process	Any process that modulates the frequency, rate or extent of a muscle system process, a multicellular organismal process carried out by any of the organs or tissues in a muscle system.	4.69% (12/256)	0.00111169	2.95	11474;11539;11555;11640;11938;12389;18091;19735;20416;268860;29856;56183	Actn3;Adora1;Adrb2;Akap1;Atp2a2;Cav1;Nkx2-5;Rgs2;Shc1;Abat;Smtn;Nmu	2.73% (7/256)	0.244626	0.61	NA	NA
14			6.51	GO:0006937	regulation of muscle contraction	Any process that modulates the frequency, rate or extent of muscle contraction.	6.63% (11/166)	9.55548e-05	4.02	11474;11539;11555;11938;12389;18091;19735;20416;268860;29856;56183	Actn3;Adora1;Adrb2;Atp2a2;Cav1;Nkx2-5;Rgs2;Shc1;Abat;Smtn;Nmu	3.61% (6/166)	0.112151	0.95	NA	NA
14			7.5	GO:0006940	regulation of smooth muscle contraction	Any process that modulates the frequency, rate or extent of smooth muscle contraction.	10.14% (7/69)	0.000134056	3.87	11539;11555;12389;19735;20416;268860;56183	Adora1;Adrb2;Cav1;Rgs2;Shc1;Abat;Nmu	1.45% (1/69)	0.74841	0.13	NA	NA
14			7.85	GO:0045933	positive regulation of muscle contraction	Any process that activates or increases the frequency, rate or extent of muscle contraction.	9.09% (5/55)	0.00203206	2.69	11474;19735;268860;29856;56183	Actn3;Rgs2;Abat;Smtn;Nmu	7.27% (4/55)	0.023285	1.63	NA	NA
14			9.14	GO:0045989	positive regulation of striated muscle contraction	Any process that activates or increases the frequency, rate or extent of striated muscle contraction.	16.67% (3/18)	0.00295543	2.53	11474;19735;29856	Actn3;Rgs2;Smtn	16.67% (3/18)	0.00502223	2.3	11474;16535;29856	Actn3;Kcnq1;Smtn
14			7.17	GO:0006942	regulation of striated muscle contraction	Any process that modulates the frequency, rate or extent of striated muscle contraction.	7.78% (7/90)	0.000692782	3.16	11474;11539;11938;12389;18091;19735;29856	Actn3;Adora1;Atp2a2;Cav1;Nkx2-5;Rgs2;Smtn	5.56% (5/90)	0.0330723	1.48	NA	NA
14			9	GO:0014819	regulation of skeletal muscle contraction	Any process that modulates the frequency, rate or extent of skeletal muscle contraction.	6.67% (1/15)	0.219317	0.66	NA	NA	20% (3/15)	0.0029262	2.53	11474;14705;16518	Actn3;Bscl2;Kcnj2
15		Developmental process	4.34	GO:0031175	neuron projection development	The process whose specific outcome is the progression of a neuron projection over time, from its formation to the mature structure. A neuron projection is any process extending from a neural cell, such as axons or dendrites (collectively called neurites).	3.08% (35/1138)	0.000271016	3.57	110596;11658;11977;12286;12305;14130;14270;14587;16470;16772;17181;18028;18483;18845;19266;193385;19735;20319;20320;20355;20416;20614;20971;20979;22067;244281;26901;27279;319504;329628;338362;56177;73710;77097;80297	Arhgef28;Alcam;Atp7a;Cacna1a;Ddr1;Fcgr2b;Srgap2;Gfra3;Ush1g;Lama1;Matn2;Nfib;Palm;Plxna2;Ptprd;Ripor2;Rgs2;Sfrp2;Nptn;Sema4f;Shc1;Snap25;Sdc4;Syt1;Trpc5;Myo16;Ss18l2;Tnfrsf12a;Nrcam;Fat4;Ust;Olfm1;Tubb2b;Tanc2;Sptbn4	2.72% (31/1138)	0.0451381	1.35	NA	NA
15			5.11	GO:0061564	axon development	The progression of an axon over time. Covers axonogenesis (de novo generation of an axon) and axon regeneration (regrowth), as well as processes pertaining to the progression of the axon over time (fasciculation and defasciculation).	3.35% (18/538)	0.00353052	2.45	110596;11658;12286;12305;14587;16772;17181;18028;18845;20320;20355;22067;27279;319504;338362;56177;73710;80297	Arhgef28;Alcam;Cacna1a;Ddr1;Gfra3;Lama1;Matn2;Nfib;Plxna2;Nptn;Sema4f;Trpc5;Tnfrsf12a;Nrcam;Ust;Olfm1;Tubb2b;Sptbn4	3.53% (19/538)	0.0112323	1.95	NA	NA
15			5.22	GO:0007409	axonogenesis	De novo generation of a long process of a neuron, including the terminal branched region. Refers to the morphogenesis or creation of shape or form of the developing axon, which carries efferent (outgoing) action potentials from the cell body towards target cells.	3.45% (17/493)	0.00334558	2.48	110596;11658;12286;14587;16772;17181;18028;18845;20320;20355;22067;27279;319504;338362;56177;73710;80297	Arhgef28;Alcam;Cacna1a;Gfra3;Lama1;Matn2;Nfib;Plxna2;Nptn;Sema4f;Trpc5;Tnfrsf12a;Nrcam;Ust;Olfm1;Tubb2b;Sptbn4	3.65% (18/493)	0.00977845	2.01	11302;11785;11921;13175;13636;13654;14297;16897;16971;17181;18424;20346;20429;22084;22368;22415;226251;270190	Aatk;Apbb1;Atoh1;Dclk1;Efna1;Egr2;Fxn;Llgl1;Lrp1;Matn2;Otx2;Sema3a;Shox2;Tsc2;Trpv2;Wnt3;Ablim1;Ephb1
15			4.84	GO:0048812	neuron projection morphogenesis	The process in which the anatomical structures of a neuron projection are generated and organized. A neuron projection is any process extending from a neural cell, such as axons or dendrites.	3.5% (25/714)	0.000326235	3.49	110596;11658;11977;12286;12305;14270;14587;16772;17181;18028;18845;19266;20320;20355;20979;22067;244281;26901;27279;319504;338362;56177;73710;77097;80297	Arhgef28;Alcam;Atp7a;Cacna1a;Ddr1;Srgap2;Gfra3;Lama1;Matn2;Nfib;Plxna2;Ptprd;Nptn;Sema4f;Syt1;Trpc5;Myo16;Ss18l2;Tnfrsf12a;Nrcam;Ust;Olfm1;Tubb2b;Tanc2;Sptbn4	3.08% (22/714)	0.0276202	1.56	NA	NA
15			7.54	GO:0060119	inner ear receptor cell development	The process whose specific outcome is the progression of an inner ear receptor cell over time, from its formation to the mature structure. Cell development does not include the steps involved in committing a cell to a specific fate.	7.69% (5/65)	0.0042256	2.37	16470;193385;20971;329628;57265	Ush1g;Ripor2;Sdc4;Fat4;Fzd2	1.54% (1/65)	0.727425	0.14	NA	NA
15			7.89	GO:0060122	inner ear receptor cell stereocilium organization	A process that is carried out at the cellular level which results in the assembly, arrangement of constituent parts, or disassembly of a stereocilium. A stereocilium is an actin-based protrusion from the apical surface of inner ear receptor cells.	8.7% (4/46)	0.00670215	2.17	16470;193385;20971;329628	Ush1g;Ripor2;Sdc4;Fat4	0% (0/46)	1	0	NA	NA
15			3.63	GO:0022008	neurogenesis	Generation of cells within the nervous system.	3.02% (57/1885)	4.63662e-06	5.33	103743;110596;11658;11906;11977;12142;12286;12305;12389;12394;13867;13983;14130;14270;14587;14842;15511;16470;16772;16847;17181;18028;18091;18483;18514;18845;19266;193385;19735;20319;20320;20355;20416;20614;20971;20979;212712;213696;21413;22067;22409;226646;244281;26901;27279;319504;329628;338362;387609;56079;56177;57265;73710;76441;77097;79362;80297	Tmem98;Arhgef28;Alcam;Zfhx3;Atp7a;Prdm1;Cacna1a;Ddr1;Cav1;Runx1;Erbb3;Esr2;Fcgr2b;Srgap2;Gfra3;Gsx1;Hspa1b;Ush1g;Lama1;Lepr;Matn2;Nfib;Nkx2-5;Palm;Pbx1;Plxna2;Ptprd;Ripor2;Rgs2;Sfrp2;Nptn;Sema4f;Shc1;Snap25;Sdc4;Syt1;Satb2;Duoxa1;Tcf4;Trpc5;Wnt10a;Ndufs2;Myo16;Ss18l2;Tnfrsf12a;Nrcam;Fat4;Ust;Zhx2;Astn2;Olfm1;Fzd2;Tubb2b;Daam2;Tanc2;Bhlhe41;Sptbn4	2.86% (54/1885)	0.00376378	2.42	104156;11302;11785;11921;12028;12142;12367;12850;13175;13636;13654;13983;14297;14609;16535;16897;16971;17181;18103;18189;18424;18442;19156;19205;19415;20336;20346;20429;20614;20678;208647;212712;21413;21678;22059;22084;22158;22368;224045;22415;225631;225998;226251;230674;23954;244281;26889;269604;270190;52163;64138;72313;76441;79362	Etv5;Aatk;Apbb1;Atoh1;Bax;Prdm1;Casp3;Coq7;Dclk1;Efna1;Egr2;Esr2;Fxn;Gja1;Kcnq1;Llgl1;Lrp1;Matn2;Nme2;Nrxn1;Otx2;P2ry2;Psap;Ptbp1;Rasal1;Exoc4;Sema3a;Shox2;Snap25;Sox5;Creb3l2;Satb2;Tcf4;Tead3;Trp53;Tsc2;Tulp3;Trpv2;Eif2b5;Wnt3;Onecut2;Rorb;Ablim1;Kdm4a;Nek3;Myo16;Cln8;Gpr157;Ephb1;Camk1;Ctsz;Fryl;Daam2;Bhlhe41
15			3.9	GO:0030182	neuron differentiation	The process in which a relatively unspecialized cell acquires specialized features of a neuron.	3.11% (49/1575)	1.11991e-05	4.95	110596;11658;11906;11977;12142;12286;12305;12389;12394;14130;14270;14587;14842;15511;16470;16772;17181;18028;18091;18483;18514;18845;19266;193385;19735;20319;20320;20355;20416;20614;20971;20979;212712;213696;21413;22067;22409;244281;26901;27279;319504;329628;338362;387609;56177;57265;73710;77097;80297	Arhgef28;Alcam;Zfhx3;Atp7a;Prdm1;Cacna1a;Ddr1;Cav1;Runx1;Fcgr2b;Srgap2;Gfra3;Gsx1;Hspa1b;Ush1g;Lama1;Matn2;Nfib;Nkx2-5;Palm;Pbx1;Plxna2;Ptprd;Ripor2;Rgs2;Sfrp2;Nptn;Sema4f;Shc1;Snap25;Sdc4;Syt1;Satb2;Duoxa1;Tcf4;Trpc5;Wnt10a;Myo16;Ss18l2;Tnfrsf12a;Nrcam;Fat4;Ust;Zhx2;Olfm1;Fzd2;Tubb2b;Tanc2;Sptbn4	2.79% (44/1575)	0.0130716	1.88	NA	NA
15			3.72	GO:0048699	generation of neurons	The process in which nerve cells are generated. This includes the production of neuroblasts and their differentiation into neurons.	3.05% (54/1770)	6.64445e-06	5.18	103743;110596;11658;11906;11977;12142;12286;12305;12389;12394;13983;14130;14270;14587;14842;15511;16470;16772;17181;18028;18091;18483;18514;18845;19266;193385;19735;20319;20320;20355;20416;20614;20971;20979;212712;213696;21413;22067;22409;244281;26901;27279;319504;329628;338362;387609;56079;56177;57265;73710;76441;77097;79362;80297	Tmem98;Arhgef28;Alcam;Zfhx3;Atp7a;Prdm1;Cacna1a;Ddr1;Cav1;Runx1;Esr2;Fcgr2b;Srgap2;Gfra3;Gsx1;Hspa1b;Ush1g;Lama1;Matn2;Nfib;Nkx2-5;Palm;Pbx1;Plxna2;Ptprd;Ripor2;Rgs2;Sfrp2;Nptn;Sema4f;Shc1;Snap25;Sdc4;Syt1;Satb2;Duoxa1;Tcf4;Trpc5;Wnt10a;Myo16;Ss18l2;Tnfrsf12a;Nrcam;Fat4;Ust;Zhx2;Astn2;Olfm1;Fzd2;Tubb2b;Daam2;Tanc2;Bhlhe41;Sptbn4	2.82% (50/1770)	0.00684125	2.16	104156;11302;11785;11921;12028;12142;12367;13175;13636;13654;13983;14297;14609;16535;16897;16971;17181;18103;18189;18424;18442;19156;19205;19415;20346;20429;20614;20678;208647;212712;21413;21678;22059;22084;22158;22368;22415;225631;225998;226251;230674;23954;244281;26889;270190;52163;64138;72313;76441;79362	Etv5;Aatk;Apbb1;Atoh1;Bax;Prdm1;Casp3;Dclk1;Efna1;Egr2;Esr2;Fxn;Gja1;Kcnq1;Llgl1;Lrp1;Matn2;Nme2;Nrxn1;Otx2;P2ry2;Psap;Ptbp1;Rasal1;Sema3a;Shox2;Snap25;Sox5;Creb3l2;Satb2;Tcf4;Tead3;Trp53;Tsc2;Tulp3;Trpv2;Wnt3;Onecut2;Rorb;Ablim1;Kdm4a;Nek3;Myo16;Cln8;Ephb1;Camk1;Ctsz;Fryl;Daam2;Bhlhe41
15			4.19	GO:0048666	neuron development	The process whose specific outcome is the progression of a neuron over time, from initial commitment of the cell to a specific fate, to the fully functional differentiated cell.	3% (39/1298)	0.000193719	3.71	110596;11658;11977;12142;12286;12305;12394;14130;14270;14587;16470;16772;17181;18028;18483;18514;18845;19266;193385;19735;20319;20320;20355;20416;20614;20971;20979;22067;244281;26901;27279;319504;329628;338362;56177;57265;73710;77097;80297	Arhgef28;Alcam;Atp7a;Prdm1;Cacna1a;Ddr1;Runx1;Fcgr2b;Srgap2;Gfra3;Ush1g;Lama1;Matn2;Nfib;Palm;Pbx1;Plxna2;Ptprd;Ripor2;Rgs2;Sfrp2;Nptn;Sema4f;Shc1;Snap25;Sdc4;Syt1;Trpc5;Myo16;Ss18l2;Tnfrsf12a;Nrcam;Fat4;Ust;Olfm1;Fzd2;Tubb2b;Tanc2;Sptbn4	2.7% (35/1298)	0.0393438	1.41	NA	NA
15			4.95	GO:0048667	cell morphogenesis involved in neuron differentiation	The process in which the structures of a neuron are generated and organized. This process occurs while the initially relatively unspecialized cell is acquiring the specialized features of a neuron.	3.31% (22/664)	0.0014936	2.83	110596;11658;11977;12286;14587;16772;17181;18028;18845;19266;193385;20320;20355;22067;26901;27279;319504;338362;56177;73710;77097;80297	Arhgef28;Alcam;Atp7a;Cacna1a;Gfra3;Lama1;Matn2;Nfib;Plxna2;Ptprd;Ripor2;Nptn;Sema4f;Trpc5;Ss18l2;Tnfrsf12a;Nrcam;Ust;Olfm1;Tubb2b;Tanc2;Sptbn4	2.71% (18/664)	0.11119	0.95	NA	NA
15			4.56	GO:0022603	regulation of anatomical structure morphogenesis	Any process that modulates the frequency, rate or extent of anatomical structure morphogenesis.	2.73% (31/1137)	0.00392686	2.41	114301;11555;12286;12394;14343;16002;17872;18028;18483;18845;19223;19266;192662;193385;20319;20355;20416;20979;21413;22067;22409;26901;27279;27428;338362;56177;57265;69217;73710;74769;77097	Palmd;Adrb2;Cacna1a;Runx1;Fut1;Igf2;Ppp1r15a;Nfib;Palm;Plxna2;Ptgis;Ptprd;Arhgdia;Ripor2;Sfrp2;Sema4f;Shc1;Syt1;Tcf4;Trpc5;Wnt10a;Ss18l2;Tnfrsf12a;Shroom3;Ust;Olfm1;Fzd2;Plekha4;Tubb2b;Pik3cb;Tanc2	2.81% (32/1137)	0.028972	1.54	NA	NA
15			9.74	GO:0060312	regulation of blood vessel remodeling	Any process that modulates the rate, frequency or extent of blood vessel remodeling, the reorganization or renovation of existing blood vessels.	0% (0/10)	1	0	NA	NA	30% (3/10)	0.000830642	3.08	14609;16971;69660	Gja1;Lrp1;Tmbim1
15			9.43	GO:0048630	skeletal muscle tissue growth	The increase in size or mass of a skeletal muscle. This may be due to a change in the fiber number or size.	25% (3/12)	0.000857	3.07	11474;11555;16002	Actn3;Adrb2;Igf2	16.67% (2/12)	0.0225788	1.65	NA	NA
15			5.85	GO:0048638	regulation of developmental growth	Any process that modulates the frequency, rate or extent of developmental growth.	3.69% (15/407)	0.00309284	2.51	11474;11555;14683;16002;18091;19735;20319;20355;20979;22067;268396;27279;56177;67603;80297	Actn3;Adrb2;Gnas;Igf2;Nkx2-5;Rgs2;Sfrp2;Sema4f;Syt1;Trpc5;Sh3pxd2b;Tnfrsf12a;Olfm1;Dusp6;Sptbn4	2.95% (12/407)	0.111182	0.95	NA	NA
15			4.92	GO:0045664	regulation of neuron differentiation	Any process that modulates the frequency, rate or extent of neuron differentiation.	3.27% (26/795)	0.000691805	3.16	11906;12286;12389;15511;18091;18483;18514;18845;19266;19735;20319;20320;20355;20614;20979;213696;21413;22067;26901;27279;319504;338362;387609;56177;73710;77097	Zfhx3;Cacna1a;Cav1;Hspa1b;Nkx2-5;Palm;Pbx1;Plxna2;Ptprd;Rgs2;Sfrp2;Nptn;Sema4f;Snap25;Syt1;Duoxa1;Tcf4;Trpc5;Ss18l2;Tnfrsf12a;Nrcam;Ust;Zhx2;Olfm1;Tubb2b;Tanc2	2.89% (23/795)	0.0451867	1.34	NA	NA
15			4.62	GO:0050767	regulation of neurogenesis	Any process that modulates the frequency, rate or extent of neurogenesis, the generation of cells in the nervous system.	3.04% (30/986)	0.000881396	3.05	103743;11906;12286;12389;14270;15511;18091;18483;18514;18845;19266;19735;20319;20320;20355;20614;20979;213696;21413;22067;26901;27279;319504;338362;387609;56177;73710;76441;77097;79362	Tmem98;Zfhx3;Cacna1a;Cav1;Srgap2;Hspa1b;Nkx2-5;Palm;Pbx1;Plxna2;Ptprd;Rgs2;Sfrp2;Nptn;Sema4f;Snap25;Syt1;Duoxa1;Tcf4;Trpc5;Ss18l2;Tnfrsf12a;Nrcam;Ust;Zhx2;Olfm1;Tubb2b;Daam2;Tanc2;Bhlhe41	2.74% (27/986)	0.0558031	1.25	NA	NA
15			4.43	GO:0051960	regulation of nervous system development	Any process that modulates the frequency, rate or extent of nervous system development, the origin and formation of nervous tissue.	2.87% (32/1116)	0.00156916	2.8	103743;11906;12286;12389;14270;15511;18091;18483;18514;18845;19266;19735;20319;20320;20355;20614;20979;213696;21413;22067;26901;27279;319504;338362;387609;56177;57265;65945;73710;76441;77097;79362	Tmem98;Zfhx3;Cacna1a;Cav1;Srgap2;Hspa1b;Nkx2-5;Palm;Pbx1;Plxna2;Ptprd;Rgs2;Sfrp2;Nptn;Sema4f;Snap25;Syt1;Duoxa1;Tcf4;Trpc5;Ss18l2;Tnfrsf12a;Nrcam;Ust;Zhx2;Olfm1;Fzd2;Clstn1;Tubb2b;Daam2;Tanc2;Bhlhe41	2.69% (30/1116)	0.0553823	1.26	NA	NA
15			3.6	GO:2000026	regulation of multicellular organismal development	NA	2.33% (54/2315)	0.00490475	2.31	103743;11474;11555;11906;12142;12286;12389;12394;13867;14270;14343;14683;15511;16002;16772;17311;17872;18028;18091;18483;18514;18845;19223;19266;19735;20319;20320;20355;20416;20614;20979;213696;21413;22067;22409;234515;268396;26901;27279;319504;329628;338362;387609;56177;57265;65945;67603;69217;73710;74443;74769;76441;77097;79362	Tmem98;Actn3;Adrb2;Zfhx3;Prdm1;Cacna1a;Cav1;Runx1;Erbb3;Srgap2;Fut1;Gnas;Hspa1b;Igf2;Lama1;Kitl;Ppp1r15a;Nfib;Nkx2-5;Palm;Pbx1;Plxna2;Ptgis;Ptprd;Rgs2;Sfrp2;Nptn;Sema4f;Shc1;Snap25;Syt1;Duoxa1;Tcf4;Trpc5;Wnt10a;Inpp4b;Sh3pxd2b;Ss18l2;Tnfrsf12a;Nrcam;Fat4;Ust;Zhx2;Olfm1;Fzd2;Clstn1;Dusp6;Plekha4;Tubb2b;P4htm;Pik3cb;Daam2;Tanc2;Bhlhe41	2.33% (54/2315)	0.113175	0.95	NA	NA
15			7.76	GO:0051148	negative regulation of muscle cell differentiation	Any process that stops, prevents, or reduces the frequency, rate or extent of muscle cell differentiation.	7.25% (5/69)	0.00545323	2.26	16002;18091;19735;71973;79362	Igf2;Nkx2-5;Rgs2;Rbpms2;Bhlhe41	4.35% (3/69)	0.156149	0.81	NA	NA
15			3.5	GO:0048468	cell development	The process whose specific outcome is the progression of the cell over time, from its formation to the mature structure. Cell development does not include the steps involved in committing a cell to a specific fate.	2.25% (57/2536)	0.00822581	2.08	103743;110596;11474;11658;11790;11906;11938;11977;12142;12286;12305;12389;12394;13983;14130;14270;14587;15511;16470;16772;17181;17311;18028;18091;18483;18514;18845;19266;193385;19735;20319;20320;20355;20416;20614;20971;20979;212712;213696;21413;22067;244281;26901;27279;27428;319504;329628;338362;384619;387609;56177;57265;73710;76441;77097;79362;80297	Tmem98;Arhgef28;Actn3;Alcam;Speg;Zfhx3;Atp2a2;Atp7a;Prdm1;Cacna1a;Ddr1;Cav1;Runx1;Esr2;Fcgr2b;Srgap2;Gfra3;Hspa1b;Ush1g;Lama1;Matn2;Kitl;Nfib;Nkx2-5;Palm;Pbx1;Plxna2;Ptprd;Ripor2;Rgs2;Sfrp2;Nptn;Sema4f;Shc1;Snap25;Sdc4;Syt1;Satb2;Duoxa1;Tcf4;Trpc5;Myo16;Ss18l2;Tnfrsf12a;Shroom3;Nrcam;Fat4;Ust;Kash5;Zhx2;Olfm1;Fzd2;Tubb2b;Daam2;Tanc2;Bhlhe41;Sptbn4	2.33% (59/2536)	0.104591	0.98	NA	NA
15			4.5	GO:0060284	regulation of cell development	Any process that modulates the rate, frequency or extent of the progression of the cell over time, from its formation to the mature structure. Cell development does not include the steps involved in committing a cell to a specific fate.	2.81% (32/1140)	0.00218879	2.66	103743;11474;11906;12286;12389;12394;14270;15511;18091;18483;18514;18845;19266;19735;20319;20320;20355;20614;20979;213696;21413;22067;26901;27279;319504;338362;387609;56177;73710;76441;77097;79362	Tmem98;Actn3;Zfhx3;Cacna1a;Cav1;Runx1;Srgap2;Hspa1b;Nkx2-5;Palm;Pbx1;Plxna2;Ptprd;Rgs2;Sfrp2;Nptn;Sema4f;Snap25;Syt1;Duoxa1;Tcf4;Trpc5;Ss18l2;Tnfrsf12a;Nrcam;Ust;Zhx2;Olfm1;Tubb2b;Daam2;Tanc2;Bhlhe41	2.63% (30/1140)	0.0687373	1.16	NA	NA
15			7.25	GO:0001736	establishment of planar polarity	Coordinated organization of groups of cells in the plane of an epithelium, such that they all orient to similar coordinates.	8.06% (5/62)	0.00344461	2.46	20319;329628;56079;57265;69217	Sfrp2;Fat4;Astn2;Fzd2;Plekha4	3.23% (2/62)	0.347583	0.46	NA	NA
15			7	GO:0001738	morphogenesis of a polarized epithelium	The morphogenetic process in which the anatomical structures of a polarized epithelium are generated and organized. A polarized epithelium is an epithelium where the epithelial sheet is oriented with respect to the planar axis.	6.82% (6/88)	0.00324064	2.49	16772;20319;329628;56079;57265;69217	Lama1;Sfrp2;Fat4;Astn2;Fzd2;Plekha4	4.55% (4/88)	0.0969056	1.01	NA	NA
15			1.75	GO:0032502	developmental process	A biological process whose specific outcome is the progression of an integrated living unit: an anatomical structure (which may be a subcellular structure, cell, tissue, or organ), or organism over time from an initial condition to a later condition.	1.97% (130/6598)	0.00721714	2.14	100628625;103743;107589;108958;110596;11428;114301;11433;11474;11555;11658;11790;11906;11938;11977;12029;12142;12286;12305;12307;12333;12369;12389;12394;12416;12651;12724;13033;13593;13867;13983;14130;14199;14270;14343;14587;14652;14683;14718;14842;15356;15511;16002;16470;16716;16772;16847;16913;17181;17311;17389;17872;18028;18091;18483;18514;18845;19041;19223;19266;192662;193385;19735;20319;2032…	Mir5100;Tmem98;Mylk;Miga2;Arhgef28;Aco1;Palmd;Acp5;Actn3;Adrb2;Alcam;Speg;Zfhx3;Atp2a2;Atp7a;Bcl6b;Prdm1;Cacna1a;Ddr1;Calb1;Capn1;Casp7;Cav1;Runx1;Cbx2;Chkb;Clcn2;Ctsd;Ebf3;Erbb3;Esr2;Fcgr2b;Fhl1;Srgap2;Fut1;Gfra3;Glp1r;Gnas;Got1;Gsx1;Hmgcl;Hspa1b;Igf2;Ush1g;Ky;Lama1;Lepr;Psmb8;Matn2;Kitl;Mmp16;Ppp1r15a;Nfib;Nkx2-5;Palm;Pbx1;Plxna2;Ppl;Ptgis;Ptprd;Arhgdia;Ripor2;Rgs2;Sfrp2;Nptn;Sema4f;Shc1;Snap25…	2.15% (142/6598)	0.123198	0.91	NA	NA
15			7.24	GO:0007164	establishment of tissue polarity	Coordinated organization of groups of cells in a tissue, such that they all orient to similar coordinates.	7.94% (5/63)	0.00369231	2.43	20319;329628;56079;57265;69217	Sfrp2;Fat4;Astn2;Fzd2;Plekha4	3.17% (2/63)	0.354763	0.45	NA	NA
15			4.46	GO:0000902	cell morphogenesis	The developmental process in which the size or shape of a cell is generated and organized.	2.63% (30/1141)	0.00744817	2.13	110596;114301;11658;11977;12286;12305;14270;14587;16772;17181;18028;18483;18845;19266;192662;193385;20320;20355;20979;22067;244281;26901;27279;27428;319504;338362;56177;73710;77097;80297	Arhgef28;Palmd;Alcam;Atp7a;Cacna1a;Ddr1;Srgap2;Gfra3;Lama1;Matn2;Nfib;Palm;Plxna2;Ptprd;Arhgdia;Ripor2;Nptn;Sema4f;Syt1;Trpc5;Myo16;Ss18l2;Tnfrsf12a;Shroom3;Nrcam;Ust;Olfm1;Tubb2b;Tanc2;Sptbn4	2.54% (29/1141)	0.100433	1	NA	NA
15			3.05	GO:0009653	anatomical structure morphogenesis	The process in which anatomical structures are generated and organized. Morphogenesis pertains to the creation of form.	2.44% (70/2873)	0.0003916	3.41	107589;110596;114301;11433;11474;11555;11658;11977;12142;12286;12305;12307;12333;12389;12394;13033;13983;14270;14343;14587;14683;16002;16470;16772;16847;17181;17389;17872;18028;18091;18483;18514;18845;19223;19266;192662;193385;20319;20320;20355;20416;20971;20979;212712;21413;214133;217011;22067;22409;22658;244281;268396;26901;27279;27428;319504;329628;338362;381373;387609;56079;56177;57265;67112;…	Mylk;Arhgef28;Palmd;Acp5;Actn3;Adrb2;Alcam;Atp7a;Prdm1;Cacna1a;Ddr1;Calb1;Capn1;Cav1;Runx1;Ctsd;Esr2;Srgap2;Fut1;Gfra3;Gnas;Igf2;Ush1g;Lama1;Lepr;Matn2;Mmp16;Ppp1r15a;Nfib;Nkx2-5;Palm;Pbx1;Plxna2;Ptgis;Ptprd;Arhgdia;Ripor2;Sfrp2;Nptn;Sema4f;Shc1;Sdc4;Syt1;Satb2;Tcf4;Tet2;Nle1;Trpc5;Wnt10a;Pcgf2;Myo16;Sh3pxd2b;Ss18l2;Tnfrsf12a;Shroom3;Nrcam;Fat4;Ust;Sp9;Zhx2;Astn2;Olfm1;Fzd2;Fgf22;Plekha4;Snx10;Tu…	2.54% (73/2873)	0.0142511	1.85	NA	NA
15			3.15	GO:0007399	nervous system development	The process whose specific outcome is the progression of nervous tissue over time, from its formation to its mature state.	2.51% (62/2475)	0.000437313	3.36	103743;110596;11658;11906;11977;12142;12286;12305;12389;12394;13867;13983;14130;14270;14343;14587;14842;15511;16470;16772;16847;17181;18028;18091;18483;18514;18845;19266;193385;19735;20319;20320;20355;20416;20614;20971;20979;212712;213696;21413;22067;22409;226646;244281;26901;27279;27428;319504;329628;338362;387609;554327;56079;56177;57265;65945;67801;73710;76441;77097;79362;80297	Tmem98;Arhgef28;Alcam;Zfhx3;Atp7a;Prdm1;Cacna1a;Ddr1;Cav1;Runx1;Erbb3;Esr2;Fcgr2b;Srgap2;Fut1;Gfra3;Gsx1;Hspa1b;Ush1g;Lama1;Lepr;Matn2;Nfib;Nkx2-5;Palm;Pbx1;Plxna2;Ptprd;Ripor2;Rgs2;Sfrp2;Nptn;Sema4f;Shc1;Snap25;Sdc4;Syt1;Satb2;Duoxa1;Tcf4;Trpc5;Wnt10a;Ndufs2;Myo16;Ss18l2;Tnfrsf12a;Shroom3;Nrcam;Fat4;Ust;Zhx2;2610042L04Rik;Astn2;Olfm1;Fzd2;Clstn1;Pllp;Tubb2b;Daam2;Tanc2;Bhlhe41;Sptbn4	2.55% (63/2475)	0.0216808	1.66	NA	NA
15			4.47	GO:0007417	central nervous system development	The process whose specific outcome is the progression of the central nervous system over time, from its formation to the mature structure. The central nervous system is the core nervous system that serves an integrating and coordinating function. In vertebrates it consists of the brain and spinal cord. In those invertebrates with a central nervous system it typically consists of a brain, cerebral…	2.1% (20/952)	0.152972	0.82	NA	NA	3.15% (30/952)	0.00845944	2.07	11302;11671;11921;12028;13162;13175;13654;13983;15373;16897;16971;18189;18424;19156;20259;20336;20346;20678;212712;22059;22158;224045;22415;230674;26889;270190;67199;68151;70300;76441	Aatk;Aldh3a2;Atoh1;Bax;Slc6a3;Dclk1;Egr2;Esr2;Hmx3;Llgl1;Lrp1;Nrxn1;Otx2;Psap;Scin;Exoc4;Sema3a;Sox5;Satb2;Trp53;Tulp3;Eif2b5;Wnt3;Kdm4a;Cln8;Ephb1;Pfdn1;Wls;Fuz;Daam2
15			4.13	GO:0009887	animal organ morphogenesis	Morphogenesis of an animal organ. An organ is defined as a tissue or set of tissues that work together to perform a specific function or functions. Morphogenesis is the process in which anatomical structures are generated and organized. Organs are commonly observed as visibly distinct structures, but may also exist as loosely associated clusters of cells that work together to perform a specific f…	2.82% (32/1133)	0.00198935	2.7	107589;11433;11474;12142;12305;12307;12333;12389;13033;13983;14683;16002;16470;16772;17389;18028;18091;18514;193385;20319;212712;214133;217011;22409;22658;268396;329628;387609;57265;67112;69217;71982	Mylk;Acp5;Actn3;Prdm1;Ddr1;Calb1;Capn1;Cav1;Ctsd;Esr2;Gnas;Igf2;Ush1g;Lama1;Mmp16;Nfib;Nkx2-5;Pbx1;Ripor2;Sfrp2;Satb2;Tet2;Nle1;Wnt10a;Pcgf2;Sh3pxd2b;Fat4;Zhx2;Fzd2;Fgf22;Plekha4;Snx10	2.74% (31/1133)	0.0430085	1.37	NA	NA
15			2	GO:0007275	multicellular organism development	The biological process whose specific outcome is the progression of a multicellular organism over time from an initial condition (e.g. a zygote or a young adult) to a later condition (e.g. a multicellular animal or an aged adult).	2% (112/5594)	0.00863578	2.06	103743;107589;108958;110596;11428;11433;11474;11555;11658;11790;11906;11977;12142;12286;12305;12307;12333;12369;12389;12394;12416;12651;12724;13033;13593;13867;13983;14130;14199;14270;14343;14587;14683;14842;15356;15511;16002;16470;16716;16772;16847;17181;17311;17389;17872;18028;18091;18483;18514;18845;19041;19223;19266;193385;19735;20319;20320;20355;20416;20614;20971;20979;211151;212712;213696;2…	Tmem98;Mylk;Miga2;Arhgef28;Aco1;Acp5;Actn3;Adrb2;Alcam;Speg;Zfhx3;Atp7a;Prdm1;Cacna1a;Ddr1;Calb1;Capn1;Casp7;Cav1;Runx1;Cbx2;Chkb;Clcn2;Ctsd;Ebf3;Erbb3;Esr2;Fcgr2b;Fhl1;Srgap2;Fut1;Gfra3;Gnas;Gsx1;Hmgcl;Hspa1b;Igf2;Ush1g;Ky;Lama1;Lepr;Matn2;Kitl;Mmp16;Ppp1r15a;Nfib;Nkx2-5;Palm;Pbx1;Plxna2;Ppl;Ptgis;Ptprd;Ripor2;Rgs2;Sfrp2;Nptn;Sema4f;Shc1;Snap25;Sdc4;Syt1;Churc1;Satb2;Duoxa1;Tcf4;Tet2;Adamts2;Nle…	2.06% (115/5594)	0.330272	0.48	NA	NA
15			4.85	GO:0048598	embryonic morphogenesis	The process in which anatomical structures are generated and organized during the embryonic phase. The embryonic phase begins with zygote formation. The end of the embryonic phase is organism-specific. For example, it would be at birth for mammals, larval hatching for insects and seed dormancy in plants.	2.11% (14/662)	0.199003	0.7	NA	NA	3.47% (23/662)	0.00678618	2.17	11921;12028;12367;12850;13636;14119;14609;15227;15373;16002;16535;18424;20336;20429;212712;22059;22084;22158;22415;320145;50493;68151;70300	Atoh1;Bax;Casp3;Coq7;Efna1;Fbn2;Gja1;Foxf1;Hmx3;Igf2;Kcnq1;Otx2;Exoc4;Shox2;Satb2;Trp53;Tsc2;Tulp3;Wnt3;Sp8;Txnrd1;Wls;Fuz
15			7.74	GO:0001707	mesoderm formation	The process that gives rise to the mesoderm. This process pertains to the initial formation of the structure from unspecified parts.	1.52% (1/66)	0.663991	0.18	NA	NA	7.58% (5/66)	0.00983325	2.01	15227;20336;22415;50493;68151	Foxf1;Exoc4;Wnt3;Txnrd1;Wls
15			6.62	GO:0030326	embryonic limb morphogenesis	The process, occurring in the embryo, by which the anatomical structures of the limb are generated and organized. A limb is an appendage of an animal used for locomotion or grasping.	2.8% (4/143)	0.207304	0.68	NA	NA	5.59% (8/143)	0.00768289	2.11	12028;14119;14609;20429;22158;22415;320145;70300	Bax;Fbn2;Gja1;Shox2;Tulp3;Wnt3;Sp8;Fuz
15			6.62	GO:0035113	embryonic appendage morphogenesis	The process, occurring in the embryo, by which the anatomical structures of the appendage are generated and organized. An appendage is an organ or part that is attached to the trunk of an organism, such as a limb or a branch.	2.8% (4/143)	0.207304	0.68	NA	NA	5.59% (8/143)	0.00768289	2.11	12028;14119;14609;20429;22158;22415;320145;70300	Bax;Fbn2;Gja1;Shox2;Tulp3;Wnt3;Sp8;Fuz

## Sheet: Supplementary_file_1c
GO.ID	Term	Annotated	Significant	Expected	classicFisher	weight01Fisher	Genes
GO:0090130	tissue migration	285	2	0.37	0.05217	0.0025	Igf2 Foxf1
GO:0000122	negative regulation of transcription by ...	857	5	1.11	0.00449	0.0045	Cbx7 Klf3 Relb Igf2 Foxf1
GO:0007494	midgut development	5	1	0.01	0.00645	0.0064	Foxf1
GO:2000467	positive regulation of glycogen (starch)...	5	1	0.01	0.00645	0.0064	Igf2
GO:0043305	negative regulation of mast cell degranu...	6	1	0.01	0.00773	0.0077	Foxf1
GO:0097070	ductus arteriosus closure	6	1	0.01	0.00773	0.0077	Foxf1
GO:1903026	negative regulation of RNA polymerase II...	6	1	0.01	0.00773	0.0077	Enho
GO:0098943	neurotransmitter receptor transport, pos...	7	1	0.01	0.00901	0.009	Cacng8
GO:0038203	TORC2 signaling	8	1	0.01	0.0103	0.0103	Prr5
GO:0006616	SRP-dependent cotranslational protein ta...	9	1	0.01	0.01157	0.0116	Sec61a2
GO:0031017	exocrine pancreas development	9	1	0.01	0.01157	0.0116	Igf2
GO:0060426	lung vasculature development	9	1	0.01	0.01157	0.0116	Foxf1
GO:0060463	lung lobe morphogenesis	9	1	0.01	0.01157	0.0116	Foxf1
GO:0090031	positive regulation of steroid hormone b...	9	1	0.01	0.01157	0.0116	Igf2
GO:2000969	positive regulation of AMPA receptor act...	9	1	0.01	0.01157	0.0116	Cacng8
GO:0098970	postsynaptic neurotransmitter receptor d...	10	1	0.01	0.01285	0.0129	Cacng8
GO:0030335	positive regulation of cell migration	539	4	0.7	0.00488	0.0132	Lgr6 Prr5 Igf2 Foxf1
GO:0030206	chondroitin sulfate biosynthetic process	11	1	0.01	0.01413	0.0141	Chst13
GO:0048617	embryonic foregut morphogenesis	11	1	0.01	0.01413	0.0141	Foxf1
GO:0048733	sebaceous gland development	13	1	0.02	0.01668	0.0167	Cbx7
GO:0006620	posttranslational protein targeting to e...	14	1	0.02	0.01795	0.0179	Sec61a2
GO:0045198	establishment of epithelial cell apical/...	14	1	0.02	0.01795	0.0179	Foxf1
GO:0032688	negative regulation of interferon-beta p...	16	1	0.02	0.02049	0.0205	Relb
GO:1905564	positive regulation of vascular endothel...	16	1	0.02	0.02049	0.0205	Igf2
GO:0045725	positive regulation of glycogen biosynth...	17	1	0.02	0.02175	0.0218	Igf2
GO:0048368	lateral mesoderm development	17	1	0.02	0.02175	0.0218	Foxf1
GO:0060644	mammary gland epithelial cell differenti...	17	1	0.02	0.02175	0.0218	Foxf1
GO:0042415	norepinephrine metabolic process	18	1	0.02	0.02302	0.023	Pnmt
GO:0060841	venous blood vessel development	18	1	0.02	0.02302	0.023	Foxf1
GO:0003214	cardiac left ventricle morphogenesis	19	1	0.02	0.02428	0.0243	Foxf1
GO:0045953	negative regulation of natural killer ce...	19	1	0.02	0.02428	0.0243	Igf2
GO:0072189	ureter development	19	1	0.02	0.02428	0.0243	Foxf1
GO:0043011	myeloid dendritic cell differentiation	20	1	0.03	0.02555	0.0255	Relb
GO:0048557	embryonic digestive tract morphogenesis	20	1	0.03	0.02555	0.0255	Foxf1
GO:0003323	type B pancreatic cell development	22	1	0.03	0.02807	0.0281	Mir375
GO:0045063	T-helper 1 cell differentiation	22	1	0.03	0.02807	0.0281	Relb
GO:0046628	positive regulation of insulin receptor ...	22	1	0.03	0.02807	0.0281	Igf2
GO:0060438	trachea development	22	1	0.03	0.02807	0.0281	Foxf1
GO:0060749	mammary gland alveolus development	22	1	0.03	0.02807	0.0281	Foxf1
GO:0032968	positive regulation of transcription elo...	23	1	0.03	0.02932	0.0293	Cbx7
GO:0048333	mesodermal cell differentiation	23	1	0.03	0.02932	0.0293	Foxf1
GO:0048675	axon extension	137	2	0.18	0.0135	0.0309	Aatk Dclk1
GO:0042104	positive regulation of activated T cell ...	26	1	0.03	0.03309	0.0331	Igf2
GO:0042423	catecholamine biosynthetic process	26	1	0.03	0.03309	0.0331	Pnmt
GO:1903861	positive regulation of dendrite extensio...	27	1	0.03	0.03434	0.0343	Rasal1
GO:0021952	central nervous system projection neuron...	28	1	0.04	0.03559	0.0356	Dclk1
GO:0031016	pancreas development	89	3	0.12	0.00021	0.0357	Mir375 Igf2 Foxf1
GO:0071480	cellular response to gamma radiation	29	1	0.04	0.03684	0.0368	Elk1
GO:0014065	phosphatidylinositol 3-kinase signaling	127	2	0.16	0.01169	0.0382	Prr5 Myo16
GO:0007420	brain development	634	3	0.82	0.04771	0.0394	Aatk Dclk1 Hmx3
GO:0060669	embryonic placenta morphogenesis	32	1	0.04	0.04057	0.0406	Igf2
GO:1900181	negative regulation of protein localizat...	32	1	0.04	0.04057	0.0406	Dclk1
GO:0035094	response to nicotine	33	1	0.04	0.04181	0.0418	Igf2
GO:0060441	epithelial tube branching involved in lu...	35	1	0.05	0.04429	0.0443	Foxf1
GO:0002053	positive regulation of mesenchymal cell ...	37	1	0.05	0.04676	0.0468	Foxf1
GO:0051968	positive regulation of synaptic transmis...	38	1	0.05	0.048	0.048	Cacng8
GO:0099590	neurotransmitter receptor internalizatio...	38	1	0.05	0.048	0.048	Cacng8

## Sheet: Supplementary_file_1d
GO.ID	Term	Annotated	Significant	Expected	classicFisher	weight01Fisher	Genes
GO:0045454	cell redox homeostasis	63	7	1.14	0.00014	0.00014	Prdx6 Txnrd1 Txnrd2 Prdx3 Txndc12 Sh3bgrl3 Prdx2
GO:0060011	Sertoli cell proliferation	7	3	0.13	0.0002	0.0002	Esr2 Bcl2l2 Bax
GO:1900020	positive regulation of protein kinase C ...	7	3	0.13	0.0002	0.0002	Nrxn1 Cemip Tcim
GO:0006228	UTP biosynthetic process	8	3	0.15	0.00031	0.00031	Nme2 Nme4 Nme6
GO:0006241	CTP biosynthetic process	9	3	0.16	0.00046	0.00046	Nme2 Nme4 Nme6
GO:0006183	GTP biosynthetic process	10	3	0.18	0.00065	0.00065	Nme2 Nme4 Nme6
GO:0070584	mitochondrion morphogenesis	24	4	0.44	0.00085	0.00085	Pnpt1 Fis1 Bax Coq7
GO:0008652	cellular amino acid biosynthetic process	61	3	1.11	0.09898	0.00097	Abat Ass1 Gad1
GO:0050714	positive regulation of protein secretion	302	12	5.48	0.00951	0.00113	Gja1 Ptbp1 Lrp1 Sec24a Abat Ifih1 Golph3l Wls Exoc1 Irf3 Apbb1 Exph5
GO:0006893	Golgi to plasma membrane transport	65	5	1.18	0.00649	0.00116	Llgl1 Stxbp6 Golph3l Exoc1 Exoc4
GO:0071310	cellular response to organic substance	2476	51	44.91	0.18542	0.00151	Satb2 Smyd3 Il20ra Prdm1 Psap Egr2 Lrp1 Pnpt1 Stx8 Trp53 Slc2a4 Cxcl16 Mir152 Twistnb Esr2 Otx2 Rpl3 Parp14 Traf7 Tsc2 Akap8 Fer Nrxn1 Lars Fbn2 Onecut2 Ccbe1 Tcf4 Epg5 Cdc42ep2 Rorb Asah2 Ifih1 Cpne3 Fis1 Creb3l2 Nod1 Jagn1 Ankrd26 Tnfrsf1a Sox5 Fuz Irf3 Bax Nucb2 Kcnq1 Casp3 Prdx2 Sesn3 Dcps Trip4
GO:0008333	endosome to lysosome transport	49	5	0.89	0.0019	0.0019	Stx8 Dtx3l Epg5 Vps39 Vps11
GO:0002263	cell activation involved in immune respo...	273	6	4.95	0.37544	0.00193	Lrp1 Trp53 Fer Nfkbid Tcim Hmox1
GO:0042744	hydrogen peroxide catabolic process	30	4	0.54	0.00201	0.00201	Prdx6 Txnrd1 Prdx3 Prdx2
GO:0043525	positive regulation of neuron apoptotic ...	79	6	1.43	0.00313	0.00313	Trp53 Ctsz Fis1 Tnfrsf1a Bax Casp3
GO:0006113	fermentation	5	2	0.09	0.00317	0.00317	Trp53 Actn3
GO:0009448	gamma-aminobutyric acid metabolic proces...	5	2	0.09	0.00317	0.00317	Abat Gad1
GO:0015867	ATP transport	5	2	0.09	0.00317	0.00317	Gja1 Slc25a42
GO:0016255	attachment of GPI anchor to protein	5	2	0.09	0.00317	0.00317	Gpaa1 Pigu
GO:0043490	malate-aspartate shuttle	5	2	0.09	0.00317	0.00317	Slc25a12 Slc25a13
GO:0046292	formaldehyde metabolic process	5	2	0.09	0.00317	0.00317	Aldh3a2 Esd
GO:1904447	folate import across plasma membrane	5	2	0.09	0.00317	0.00317	Slc19a1 Slc46a1
GO:2000002	negative regulation of DNA damage checkp...	5	2	0.09	0.00317	0.00317	Thoc5 Chek2
GO:0048147	negative regulation of fibroblast prolif...	35	4	0.63	0.00358	0.00358	Trp53 B4galt7 Tsc2 Bax
GO:0003170	heart valve development	57	4	1.03	0.01981	0.00467	Prdm1 Shox2 Efna1 Tnfrsf1a
GO:0055059	asymmetric neuroblast division	6	2	0.11	0.00469	0.00469	Tead3 Sox5
GO:0070245	positive regulation of thymocyte apoptot...	6	2	0.11	0.00469	0.00469	Trp53 Nfkbid
GO:0055114	oxidation-reduction process	880	34	15.96	3.2e-05	0.00504	Steap3 Prdx6 Marc2 Txnrd1 Pnpt1 Aldh3a2 Trp53 Dhrs4 Sdr39u1 Cryl1 Rrm2b Txnrd2 Ndufv3 Ndufs8 Actn3 Fxn Ch25h Prdx3 Slc25a12 Pygb Cyb561d1 Txndc12 Slc25a13 Ldhb Ndufa3 Gys1 Bax Uevld Nucb2 Coq7 Cyp4v3 Hmox1 Sesn3 P4htm
GO:1901653	cellular response to peptide	287	10	5.21	0.03748	0.0064	Lrp1 Trp53 Slc2a4 Tsc2 Fer Fis1 Nod1 Ankrd26 Nucb2 Sesn3
GO:0044091	membrane biogenesis	43	5	0.78	0.00105	0.00642	Pex19 Psap Tlcd1 Nrxn1 Exoc4
GO:0044242	cellular lipid catabolic process	199	7	3.61	0.0714	0.00644	Prdx6 Psap Lrp1 Amacr Bscl2 Asah2 Abhd1
GO:0015813	L-glutamate transmembrane transport	21	3	0.38	0.00618	0.00647	Slc25a12 Slc25a13 Cln8
GO:0045714	regulation of low-density lipoprotein pa...	7	2	0.13	0.00649	0.00649	Cnpy2 Sec24a
GO:0150094	amyloid-beta clearance by cellular catab...	7	2	0.13	0.00649	0.00649	Abca7 Lrp1
GO:0016192	vesicle-mediated transport	1515	40	27.48	0.01118	0.00672	Ap1s3 Steap3 Rab32 Abca7 Lrp1 Sar1b Sec24a Llgl1 Stx8 Slc2a4 Cxcl16 Copz2 Arl4d Stxbp6 Rhoj Copz1 Rubcn Dtx3l Tsc2 Fer Nrxn1 Epg5 Snx32 Pacsin3 Vps39 Snap25 Golph3l Sec24d Exoc1 Vps50 Exoc4 Creb3l2 Jagn1 Ap3s2 Vps33b P2ry2 Hmox1 Icam5 Vps11 Exph5
GO:0019674	NAD metabolic process	22	3	0.4	0.00706	0.00706	Trp53 Actn3 Ldhb
GO:0006886	intracellular protein transport	925	30	16.78	0.00165	0.00724	Ap1s3 Pex19 Rab32 Egr2 Thoc5 Sar1b Sec24a Stx8 Trp53 Copz2 Arl4d Copz1 Tsc2 Tmco6 Lars Timm10 Vps39 Wls Tbc1d1 Fis1 Exoc4 Camk1 Bax Ap3s2 Vps33b Cemip Timm29 Vps11 Exph5 Snupn
GO:0048709	oligodendrocyte differentiation	103	5	1.87	0.03966	0.00799	Otx2 Eif2b5 Daam2 Exoc4 Sox5
GO:0010954	positive regulation of protein processin...	23	3	0.42	0.00801	0.00801	Ccbe1 Ctnnd1 Fuz
GO:0006904	vesicle docking involved in exocytosis	44	4	0.8	0.00817	0.00817	Nrxn1 Exoc4 Vps33b Vps11
GO:0010039	response to iron ion	20	3	0.36	0.00537	0.00852	Abat Fxn Hmox1
GO:0097300	programmed necrotic cell death	38	3	0.69	0.03129	0.00853	Trp53 Irf3 Bax
GO:0031665	negative regulation of lipopolysaccharid...	8	2	0.15	0.00855	0.00855	Prdm1 Prdx2
GO:0045039	protein insertion into mitochondrial inn...	8	2	0.15	0.00855	0.00855	Timm10 Timm29
GO:0048743	positive regulation of skeletal muscle f...	8	2	0.15	0.00855	0.00855	Actn3 Shox2
GO:0019882	antigen processing and presentation	110	6	2	0.01517	0.00895	Rab32 Psme1 Tap1 Psmb9 Psmb8 Nod1
GO:0016242	negative regulation of macroautophagy	30	4	0.54	0.00201	0.00899	Trp53 Rubcn Tsc2 Hmox1
GO:0010499	proteasomal ubiquitin-independent protei...	24	3	0.44	0.00904	0.00904	Psmb3 Psmb9 Psmb8
GO:0008630	intrinsic apoptotic signaling pathway in...	112	9	2.03	0.00021	0.00998	Steap3 Trp53 Bcl2l2 Tmem109 Chek2 Tnfrsf1a Bcl2l12 Bax Hmox1
GO:0006367	transcription initiation from RNA polyme...	62	5	1.12	0.00532	0.01005	Med16 Trp53 Tcf4 Taf6l Polr2g
GO:0070201	regulation of establishment of protein l...	761	24	13.8	0.00652	0.01044	Gja1 Ptbp1 Lrp1 Thoc5 Sar1b Sec24a Wrap53 Abat Nrxn1 Ifih1 Snap25 Golph3l Wls Exoc1 Fis1 Exoc4 Camk1 Jagn1 Irf3 Cemip Apbb1 Ctsd Kcnq1 Exph5
GO:0014819	regulation of skeletal muscle contractio...	14	3	0.25	0.00186	0.01082	Kcnj2 Actn3 Bscl2
GO:0001764	neuron migration	185	8	3.36	0.02001	0.01086	Satb2 Gja1 Esr2 Matn2 Sema3a Atoh1 Bax Apbb1
GO:0009313	oligosaccharide catabolic process	9	2	0.16	0.01086	0.01086	Ctbs Man2c1
GO:0015810	aspartate transmembrane transport	9	2	0.16	0.01086	0.01086	Slc25a12 Slc25a13
GO:0016559	peroxisome fission	9	2	0.16	0.01086	0.01086	Pex19 Fis1
GO:0032471	negative regulation of endoplasmic retic...	9	2	0.16	0.01086	0.01086	Fis1 Bax
GO:0034058	endosomal vesicle fusion	9	2	0.16	0.01086	0.01086	Vps39 Vps11
GO:0042118	endothelial cell activation	9	2	0.16	0.01086	0.01086	Tcf4 Tcim
GO:0048539	bone marrow development	9	2	0.16	0.01086	0.01086	Ctc1 Trp53
GO:0048664	neuron fate determination	9	2	0.16	0.01086	0.01086	Otx2 Atoh1
GO:0060312	regulation of blood vessel remodeling	9	2	0.16	0.01086	0.01086	Tmbim1 Gja1
GO:0090399	replicative senescence	9	2	0.16	0.01086	0.01086	Ctc1 Trp53
GO:1905168	positive regulation of double-strand bre...	9	2	0.16	0.01086	0.01086	Mrnip Wrap53
GO:0048515	spermatid differentiation	227	3	4.12	0.78271	0.01101	Zmynd15 Bscl2 Bax
GO:0006400	tRNA modification	72	5	1.31	0.00993	0.01122	2210016F16Rik Cdk5rap1 Tyw3 Trit1 Elp6
GO:0008283	cell population proliferation	1996	42	36.2	0.17548	0.01152	Prdm1 Gja1 Pdxk Txnrd1 Lrp1 Trpv2 Ctc1 Trp53 Nme2 Wnt3 Scin Esr2 Vipr2 B4galt7 Bcl2l2 Etv5 Tsc2 Tead3 Fer Fxn Prdx3 Ctsz Shox2 Cks1b Jtb Melk Ppp1r8 Slc35f6 Nupr1l Ints1 Sox5 Zfp580 Fuz Bax Rps15a Casp3 Irf2 Hmox1 Prdx2 Ephb1 Rpl29 Wdr6
GO:0042098	T cell proliferation	205	5	3.72	0.31558	0.01265	Gja1 Trp53 Bax Casp3 Prdx2
GO:0006672	ceramide metabolic process	83	4	1.51	0.06427	0.01337	Psap Smpd5 Asah2 Cln8
GO:0021612	facial nerve structural organization	10	2	0.18	0.01341	0.01341	Egr2 Sema3a
GO:0035542	regulation of SNARE complex assembly	10	2	0.18	0.01341	0.01341	Stxbp6 Vps11
GO:0046085	adenosine metabolic process	10	2	0.18	0.01341	0.01341	Nt5c3 Nt5e
GO:0051601	exocyst localization	10	2	0.18	0.01341	0.01341	Stxbp6 Exoc1
GO:0071233	cellular response to leucine	10	2	0.18	0.01341	0.01341	Lars Sesn3
GO:0072321	chaperone-mediated protein transport	10	2	0.18	0.01341	0.01341	Pex19 Timm10
GO:0075522	IRES-dependent viral translational initi...	10	2	0.18	0.01341	0.01341	Eif2d Ptbp1
GO:1990253	cellular response to leucine starvation	10	2	0.18	0.01341	0.01341	Lars Sesn3
GO:0042771	intrinsic apoptotic signaling pathway in...	43	5	0.78	0.00105	0.01372	Steap3 Trp53 Tmem109 Chek2 Bcl2l12
GO:0010719	negative regulation of epithelial to mes...	28	3	0.51	0.01387	0.01387	Tsc2 Efna1 Fuz
GO:0090200	positive regulation of release of cytoch...	28	3	0.51	0.01387	0.01387	Trp53 Bik Bax
GO:2001244	positive regulation of intrinsic apoptot...	68	5	1.23	0.00784	0.01448	Steap3 Il20ra Trp53 Fis1 Bax
GO:0071480	cellular response to gamma radiation	29	3	0.53	0.01527	0.01527	Trp53 Tmem109 Chek2
GO:0035176	social behavior	53	4	0.96	0.01553	0.01553	Tsc2 Nrxn1 Gad1 Cln8
GO:0006977	DNA damage response, signal transduction...	11	2	0.2	0.0162	0.0162	Cradd Trp53
GO:0010739	positive regulation of protein kinase A ...	11	2	0.2	0.0162	0.0162	Nrxn1 Tcim
GO:0043653	mitochondrial fragmentation involved in ...	11	2	0.2	0.0162	0.0162	Fis1 Bax
GO:0051262	protein tetramerization	183	9	3.32	0.00638	0.0164	Hint3 Txnrd1 Trp53 Kcnj2 Dhrs4 Nrxn1 Cryz Hmgcl Dctpp1
GO:2000116	regulation of cysteine-type endopeptidas...	226	9	4.1	0.02271	0.01797	Cradd Psmb9 Fis1 Ints1 Nod1 Bcl2l12 Bax Mgmt Ctsd
GO:0086013	membrane repolarization during cardiac m...	12	2	0.22	0.01921	0.0181	Kcnj2 Kcnq1
GO:0000305	response to oxygen radical	27	2	0.49	0.08559	0.01812	Txnrd2 Prdx2
GO:1900408	negative regulation of cellular response...	53	2	0.96	0.24986	0.01814	Scly Psap
GO:0006165	nucleoside diphosphate phosphorylation	100	5	1.81	0.03561	0.01909	Nme2 Jmjd8 Actn3 Bpgm Nme6
GO:0032461	positive regulation of protein oligomeri...	23	3	0.42	0.00801	0.01914	Trp53 Bik Bax
GO:0009651	response to salt stress	39	3	0.71	0.03345	0.01917	Trp53 Slc12a6 Bax
GO:0046621	negative regulation of organ growth	42	3	0.76	0.0404	0.01917	Gja1 Fxn Ankrd26
GO:0060068	vagina development	12	2	0.22	0.01921	0.01921	Esr2 Bax
GO:0044257	cellular protein catabolic process	740	15	13.42	0.36702	0.01923	Lrp1 Psmb3 Psme1 Dtx3l Psmb9 Psmb8 Cul9 Ctsz Efna1 Wwp1 Tmub1 Chek2 Fbxl19 Cln8 Vps11
GO:0007568	aging	247	10	4.48	0.01519	0.01942	Pnpt1 Ctc1 Trp53 Abat Eif2b5 Tsc2 Chek2 Bcl2l12 Coq7 Cln8
GO:0042542	response to hydrogen peroxide	121	7	2.19	0.00662	0.01962	Psap Trp53 Fxn Prdx3 Zfp580 Casp3 Hmox1
GO:0034599	cellular response to oxidative stress	268	14	4.86	0.00042	0.02234	Scly Prdx6 Psap Pnpt1 Trp53 Etv5 Fer Fxn Prdx3 Melk Zfp580 Coq7 Hmox1 Prdx2
GO:0060452	positive regulation of cardiac muscle co...	13	2	0.24	0.02243	0.02243	Smtn Kcnq1
GO:2001034	positive regulation of double-strand bre...	13	2	0.24	0.02243	0.02243	Wrap53 Dtx3l
GO:0003279	cardiac septum development	128	4	2.32	0.20341	0.02244	Prdm1 Lrp1 Trp53 Fuz
GO:0045806	negative regulation of endocytosis	39	4	0.71	0.00532	0.02327	Abca7 Rubcn Tsc2 Pacsin3
GO:0070059	intrinsic apoptotic signaling pathway in...	63	4	1.14	0.02747	0.02333	Trp53 Txndc12 Bax Casp3
GO:0007281	germ cell development	339	6	6.15	0.58091	0.02377	Prdm1 Zmynd15 Etv5 Ccdc155 Bax Prss42
GO:0048662	negative regulation of smooth muscle cel...	53	4	0.96	0.01553	0.02515	Trp53 Esr2 Vipr2 Hmox1
GO:0006089	lactate metabolic process	20	3	0.36	0.00537	0.02576	Trp53 Actn3 Ldhb
GO:0003334	keratinocyte development	14	2	0.25	0.02586	0.02586	Psap Exph5
GO:0006007	glucose catabolic process	14	2	0.25	0.02586	0.02586	Trp53 Actn3
GO:0006264	mitochondrial DNA replication	14	2	0.25	0.02586	0.02586	Rrm2b Primpol
GO:0048672	positive regulation of collateral sprout...	14	2	0.25	0.02586	0.02586	Lrp1 Wnt3
GO:0071850	mitotic cell cycle arrest	14	2	0.25	0.02586	0.02586	Pnpt1 Trp53
GO:0090110	COPII-coated vesicle cargo loading	14	2	0.25	0.02586	0.02586	Sec24a Sec24d
GO:0031589	cell-substrate adhesion	339	7	6.15	0.41799	0.02596	Lrp1 Nedd9 Fer Onecut2 Efna1 Ephb1 Rpl29
GO:0000027	ribosomal large subunit assembly	37	3	0.67	0.0292	0.0292	Rpl3 Traf7 Mrpl11
GO:0001782	B cell homeostasis	37	3	0.67	0.0292	0.0292	Ppp2r3c Bax Casp3
GO:1901998	toxin transport	37	3	0.67	0.0292	0.0292	Copz1 Vps11 Trip4
GO:0006978	DNA damage response, signal transduction...	15	2	0.27	0.02949	0.02949	Trp53 Chek2
GO:0033235	positive regulation of protein sumoylati...	15	2	0.27	0.02949	0.02949	Traf7 Rwdd3
GO:0060134	prepulse inhibition	15	2	0.27	0.02949	0.02949	Slc6a3 Nrxn1
GO:0060742	epithelial cell differentiation involved...	15	2	0.27	0.02949	0.02949	Psap Esr2
GO:1903672	positive regulation of sprouting angioge...	41	4	0.74	0.00636	0.03308	Rhoj Jmjd8 S100a1 Hmox1
GO:0048678	response to axon injury	67	3	1.22	0.122	0.03329	Lrp1 Matn2 Bax
GO:0002070	epithelial cell maturation	16	2	0.29	0.0333	0.0333	Gja1 Esr2
GO:0010875	positive regulation of cholesterol efflu...	16	2	0.29	0.0333	0.0333	Abca7 Lrp1
GO:1902004	positive regulation of amyloid-beta form...	16	2	0.29	0.0333	0.0333	Efna1 Casp3
GO:0009059	macromolecule biosynthetic process	4049	99	73.44	0.00086	0.03343	Mgat4a Satb2 Eif2d Pigc Smyd3 Prdm1 Gja1 Egr2 Zfp280b Polrmt Ptbp1 Med16 Abca7 Il22 Cnpy2 Thoc5 Sec24a Ctc1 Aurkb Trp53 Wrap53 Slc2a4 Zmynd15 Nme2 Twistnb Esr2 Sp8 B4galt7 Zfp369 Otx2 Rrm2b Gpaa1 Rpl3 Hdac10 Ddn Eif2b5 Etv5 Dtx3l Dubr Traf7 Tsc2 Tead3 Mrps10 Fer Lars Onecut2 Tcf4 Mrpl11 Taf6l Polr2g Rorb Ablim1 Prdx3 Rpap1 Cdk5rap1 Pigu Shox2 Gatb Efna1 Cks1b S100a1 Mrps21 Rwdd3 Wwp1 Kdm4a Med18 …
GO:0005975	carbohydrate metabolic process	539	12	9.78	0.27525	0.03358	Trp53 B4galt7 Jmjd8 Actn3 Pygb Ctbs Bpgm Ldhb Gys1 Uevld Glb1l2 Man2c1
GO:1902253	regulation of intrinsic apoptotic signal...	30	4	0.54	0.00201	0.03574	Steap3 Trp53 Rrm2b Bcl2l12
GO:0090659	walking behavior	48	3	0.87	0.05628	0.03585	Psap Fxn Cln8
GO:0007622	rhythmic behavior	63	3	1.14	0.10644	0.03587	Egr2 Trp53 Gpr157
GO:0033007	negative regulation of mast cell activat...	8	2	0.15	0.00855	0.03587	Fer Hmox1
GO:0072497	mesenchymal stem cell differentiation	9	2	0.16	0.01086	0.03588	Wnt3 Sox5
GO:0009219	pyrimidine deoxyribonucleotide metabolic...	12	2	0.22	0.01921	0.03588	Tyms Dctpp1
GO:0044839	cell cycle G2/M phase transition	127	4	2.3	0.19968	0.03589	Mrnip Ctc1 Akap8 Chek2
GO:0000966	RNA 5'-end processing	17	2	0.31	0.0373	0.03589	Pnpt1 Rpp30
GO:0016101	diterpenoid metabolic process	57	2	1.03	0.27682	0.03595	Aldh3a2 Dhrs4
GO:0000302	response to reactive oxygen species	201	13	3.65	8.3e-05	0.03606	Prdx6 Psap Aldh3a2 Trp53 Txnrd2 Fer Fxn Prdx3 Zfp580 Casp3 Hmox1 Prdx2 Sesn3
GO:0034501	protein localization to kinetochore	17	2	0.31	0.0373	0.0373	Aurkb Cenpq
GO:0040015	negative regulation of multicellular org...	17	2	0.31	0.0373	0.0373	Fxn Ankrd26
GO:0045579	positive regulation of B cell differenti...	17	2	0.31	0.0373	0.0373	Prdm1 Ppp2r3c
GO:0051000	positive regulation of nitric-oxide synt...	17	2	0.31	0.0373	0.0373	S100a1 Nod1
GO:0007049	cell cycle	1640	39	29.75	0.05066	0.03743	Steap3 Zwint Cradd Thoc5 Pnpt1 Mrnip Llgl1 Ctc1 Aurkb Trp53 Nedd9 Zfp369 Psme1 Tsc2 Akap8 Cenpq Cul9 Fer Asah2 Ccndbp1 Cdk5rap1 Cks1b Jtb Melk Ptpn3 Chek2 Nupr1l Stard13 Camk1 Ccdc155 Bax Apbb1 Rps15a Cdc16 Nek3 Tcim Casp3 Wdr6 Nme6
GO:0046627	negative regulation of insulin receptor ...	41	3	0.74	0.03801	0.03801	Tsc2 Ankrd26 Nucb2
GO:0051289	protein homotetramerization	103	5	1.87	0.03966	0.03966	Hint3 Trp53 Kcnj2 Cryz Dctpp1
GO:0030010	establishment of cell polarity	138	6	2.5	0.04021	0.03987	Gja1 Llgl1 Tsc2 Exoc4 Nek3 Ephb1
GO:0042733	embryonic digit morphogenesis	71	4	1.29	0.0401	0.0401	Gja1 Tulp3 Fuz Bax
GO:0050965	detection of temperature stimulus involv...	18	2	0.33	0.04147	0.04147	Lxn Ephb1
GO:1904262	negative regulation of TORC1 signaling	18	2	0.33	0.04147	0.04147	Tsc2 Sesn3
GO:0010507	negative regulation of autophagy	74	7	1.34	0.00039	0.042	Trp53 Rubcn Tsc2 Lars Kdm4a Hmox1 Wdr6
GO:0006890	retrograde vesicle-mediated transport, G...	43	3	0.78	0.04286	0.04286	Copz2 Copz1 Golph3l
GO:0032091	negative regulation of protein binding	106	5	1.92	0.04398	0.04398	Aurkb Ckmt1 Ctsz Camk1 Bax
GO:0006302	double-strand break repair	220	8	3.99	0.04811	0.04492	Mrnip Trp53 Wrap53 Dtx3l Chek2 Ccdc155 Apbb1 Mgmt
GO:0016925	protein sumoylation	43	4	0.78	0.00754	0.0455	Egr2 Traf7 Ifih1 Rwdd3
GO:0030889	negative regulation of B cell proliferat...	19	2	0.34	0.0458	0.0458	Prdm1 Casp3
GO:0032981	mitochondrial respiratory chain complex ...	45	3	0.82	0.04801	0.04801	Ndufs8 Ndufa3 Tmem126b
GO:0007411	axon guidance	245	11	4.44	0.00536	0.04894	Egr2 Lrp1 Wnt3 Otx2 Matn2 Ablim1 Efna1 Sema3a Atoh1 Apbb1 Ephb1
GO:0033043	regulation of organelle organization	1240	29	22.49	0.09761	0.0492	Ptbp1 Lrp1 Sar1b Ctc1 Aurkb Trp53 Slc2a4 Scin Stxbp6 Rhoj Bcl2l2 Bik Rubcn Akap8 Cul9 Fer Nrxn1 Fchsd1 Cdc42ep2 Fxn Kdm4a Actr3b Slc35f6 Fis1 Fuz Bax Bst2 Vps11 Nme6

## Sheet: Supplementary_file_1e
GO.ID	Term	Annotated	Significant	Expected	classicFisher	weight01Fisher	Genes
GO:0042632	cholesterol homeostasis	85	20	6.26	2.7e-06	2.7e-06	Acox1 Apoa1 Apoa2 Apoa4 Apob Ehd1 Fabp3 Fgfr4 Gpr39 Hnf4a Hpn Lipc Mylip Nr1h3 Nr1h4 Pcsk9 Pla2g12b Plscr3 Slc37a4 Soat2
GO:0007049	cell cycle	1640	175	120.83	3e-07	1.8e-05	4933427D14Rik Abraxas1 Abraxas2 Adam17 Adamts1 Adarb1 Ajuba Ak1 Anapc11 Anapc15 Anapc2 Anapc5 Anxa11 Apbb2 Apex1 Aspm Atf2 Aurka Bex2 Bex4 Birc5 Bnip2 Brd4 Camk2d Ccdc155 Ccnb2 Ccnj Ccnt2 Cdc25b Cdc7 Cdca2 Cdk14 Cdk2ap2 Cdk5r1 Cdkn1a Cdkn1b Cdkn1c Cep250 Cep63 Chaf1b Chtf18 Chtf8 Cib1 Clasp1 Clasp2 Clic1 Csnk1a1 Ctc1 Cyld Dab2ip Dbf4 Dctn1 Ddx4 Dgkz Dlgap5 Donson Dscc1 Dync1h1 E2f6 Epb41l2 Eps8 E…
GO:0010951	negative regulation of endopeptidase act...	178	31	13.11	6.2e-06	4.3e-05	Agt Ahsg Anxa8 Birc5 Cd44 Cflar Cryab Cst7 Gapdh Gas6 Kng1 Kng2 Mdm2 Naip2 Pax2 Serpina10 Serpina1a Serpina1b Serpina1c Serpina1d Serpinb1a Serpinb6b Serpinb9 Serpind1 Serpinf1 Serpinf2 Sorl1 Spink1 Src Vtn Xiap
GO:0051301	cell division	574	71	42.29	1.2e-05	4.9e-05	Abraxas2 Anapc11 Anapc15 Anapc2 Anapc5 Anxa11 Aspm Aurka Birc5 Ccnb2 Ccnt2 Cdc25b Cdc7 Cdca2 Cdk14 Cdk2ap2 Cep63 Cib1 Clasp1 Clasp2 Csnk1a1 Dctn1 Dixdc1 Dync1h1 Epb41l2 Ercc2 Esrrb Evi5 Fgf2 Fgf9 Git1 Gnl3 Gpsm2 Hmcn1 Htr2b Il1a Kif23 Knl1 Mad2l2 Mapre2 Mdk Myo19 Ncapd2 Nedd1 Nek3 Nek6 Nek9 Nsl1 Nsmce2 Orc6 Pafah1b1 Pdcd6ip Pik3r4 Plk3 Racgap1 Sept2 Sept4 Smc1a Snx18 Spc24 Specc1l Spout1 Tent4b T…
GO:0006915	apoptotic process	1868	193	137.63	6.6e-07	9.8e-05	Abraxas2 Adam17 Adarb1 Adnp Agt Aifm3 Alb Aldh1a3 Angptl4 Ank2 Ankrd2 Apbb2 Apex1 Apoh Atf2 Atp7a Aurka Axin1 Bad Bag1 Bag3 Bcl2l2 Bex2 Bfar Birc5 Bnip2 C6 Camk2d Capn10 Capn2 Casp9 Cd44 Cd74 Cdip1 Cdk5r1 Cdkn1a Cdkn1b Ceacam5 Cep63 Cflar Chchd10 Chst11 Ciapin1 Cib1 Cited1 Col2a1 Cryab Csrnp1 Cyfip2 Cyld Dab2 Dab2ip Dapk1 Dapk2 Dffa Dido1 Dmpk Dnase1l3 Egln3 Egr1 Eif2ak2 Epb41l3 Epha7 Ercc2 Ero1l…
GO:0072378	blood coagulation, fibrin clot formation	8	5	0.59	0.0001	0.0001	Apoh F13a1 Fga Fgb Fgg
GO:0051258	protein polymerization	274	34	20.19	0.00198	0.00011	Add3 Arhgap18 Arpc2 Camsap3 Cdkn1b Clasp1 Clasp2 Coro1b Dctn1 Eps8 Evl Fga Fgb Fgg Fhod3 Fkbp4 Gas7 Gba2 Grb2 Iqgap2 Mx1 Nckap1l Nin Opa1 Rhobtb2 Sept2 Slit2 Sptan1 Tppp Trim27 Ube2s Vil1 Vill Vtn
GO:0070507	regulation of microtubule cytoskeleton o...	199	30	14.66	0.00014	0.00011	Bicd1 Camsap3 Cdk2ap2 Cdk5r1 Cdkn1b Cep250 Cib1 Clasp1 Clasp2 Cyld Dctn1 Dixdc1 Dync1h1 Epha3 Fkbp4 Gba2 Gpsm2 Hdac6 Hsph1 Kifc1 Map1a Mapre2 Nin Pafah1b1 Pdcd6ip Rassf7 Rbm14 Smc1a Specc1l Tpr
GO:0030199	collagen fibril organization	54	13	3.98	0.00011	0.00017	Anxa2 Atp7a Chadl Col11a1 Col1a1 Col1a2 Col2a1 Grem1 Lox Lum Plod2 Pxdn Serpinf2
GO:0033344	cholesterol efflux	41	9	3.02	0.00254	0.00018	Abca5 Apoa1 Apoa2 Apoa4 Apob Apoc2 Apom Nr1h3 Soat2
GO:0051129	negative regulation of cellular componen...	728	86	53.64	9.2e-06	0.00019	Acvrl1 Adam17 Add3 Adtrp Alb Anapc15 Apoa1 Apoa2 Apoa4 Apoc2 Apom Arhgap24 Arhgap6 Arpc2 Bag3 Bcl2l2 Birc5 Camsap3 Cd300a Cdk5r1 Cdkl3 Cflar Chadl Cib1 Clasp1 Clasp2 Clec16a Coro1b Crbn Cryab Ctc1 Dab2 Dffa Dpp4 Dtnbp1 Dusp22 Epha3 Epha7 Eps8 Esr1 Evl Fez2 Fgfr3 Fhod3 Fkbp4 Hdac6 Jarid2 Kdm3a Kifc1 L3mbtl2 Lamp2 Lcmt1 Lrp4 Map1a Mcrs1 Mdm2 Mnat1 Mtm1 Mylip Nr1h3 Opa1 Pafah1b1 Parp1 Pcsk9 Phf8 Pin…
GO:0051006	positive regulation of lipoprotein lipas...	9	5	0.66	0.00021	0.00021	Apoa4 Apoc2 Apoh Lmf1 Nr1h3
GO:1904754	positive regulation of vascular associat...	19	7	1.4	0.00027	0.00027	Adamts1 Agt Atp7a Fgf9 Mdm2 Ssh1 Tert
GO:0010596	negative regulation of endothelial cell ...	50	9	3.68	0.01001	0.00027	Acvrl1 Apoh Dab2ip Dcn Fgf2 Serpinf1 Slit2 Svbp Synj2bp
GO:0007596	blood coagulation	156	34	11.49	8.2e-09	0.00037	Abat Adamts13 Adamts18 Adtrp Anxa2 Anxa8 Apoh C1qtnf1 C9 Dtnbp1 Evl F10 F13a1 F2 F2rl1 Fga Fgb Fgg Gas6 Gnas Hnf4a Hpse Kng1 Kng2 Lyst Pear1 Plg Proc Ptprj Serpina10 Serpind1 Serpinf2 Sh2b3 Tfpi
GO:0032204	regulation of telomere maintenance	82	14	6.04	0.00252	0.00039	Cct8 Ctc1 Gnl3 Hdac8 Mcrs1 Parp1 Pnkp Rtel1 Smg1 Src Tcp1 Tent4b Upf1 Ylpm1
GO:0042157	lipoprotein metabolic process	123	23	9.06	3e-05	0.00039	Abhd17a Apoa1 Apoa2 Apoa4 Apob Apoc1 Apom Dpm1 Irgm2 Itgav Lypla2 Notum Pcsk9 Pigb Pigo Pigq Pigt Pigw Pigx Wdr45 Zdhhc16 Zdhhc24 Zdhhc6
GO:0051661	maintenance of centrosome location	6	4	0.44	0.00039	0.00039	Aspm Gpsm2 Pafah1b1 Spout1
GO:0070100	negative regulation of chemokine-mediate...	6	4	0.44	0.00039	0.00039	Robo1 Sh2b3 Slit2 Slit3
GO:0071557	histone H3-K27 demethylation	6	4	0.44	0.00039	0.00039	Kdm6a Pagr1a Phf8 Uty
GO:2000394	positive regulation of lamellipodium mor...	6	4	0.44	0.00039	0.00039	Coro1b Rreb1 Src Vil1
GO:0042730	fibrinolysis	20	8	1.47	4.8e-05	0.00039	Anxa2 Apoh F2 Fga Fgb Fgg Plg Serpinf2
GO:0030308	negative regulation of cell growth	194	28	14.29	0.00048	0.00042	Acvrl1 Agt Ahsg Apbb2 Caprin2 Cda Cdhr2 Cdk5r1 Cdkl3 Cdkn1a Cdkn1b Cryab Dab2 Dab2ip Dnajc2 Epha7 Fhl1 Grem1 Hnf4a Ip6k2 Ndufs3 Ptprj Rgs2 Sema4g Slit1 Slit2 Slit3 Trim40
GO:0046855	inositol phosphate dephosphorylation	15	6	1.11	0.00044	0.00044	Impa2 Inpp1 Inpp4b Inpp5a Ocrl Synj2
GO:0046716	muscle cell cellular homeostasis	21	7	1.55	0.00054	0.00054	Bag3 Cfl2 Gaa Lamp2 Lox Mtm1 Plg
GO:0051893	regulation of focal adhesion assembly	57	14	4.2	5e-05	0.00066	Acvrl1 Arhgap6 Camsap3 Clasp1 Clasp2 Col16a1 Dusp22 Epha3 Grem1 Limch1 Macf1 Ptprj Sdc4 Src
GO:0030195	negative regulation of blood coagulation	49	17	3.61	3.4e-08	0.00067	Abat Adamts18 Adtrp Anxa2 Apoh C1qtnf1 F2 Fga Fgb Fgg Kng1 Kng2 Plg Proc Serpinf2 Sh2b3 Tfpi
GO:0070328	triglyceride homeostasis	35	9	2.58	0.00076	0.0007	Angptl4 Apoa1 Apoa4 Apoc2 Hnf4a Lipc Nr1h3 Nr1h4 Pla2g12b
GO:0071479	cellular response to ionizing radiation	64	13	4.72	0.00068	0.00076	Cdkn1a Cryab Eef1d Egr1 Grb2 Hus1 Mapk14 Mdm2 Net1 Rad1 Rad51ap1 Rhno1 Tank
GO:0032532	regulation of microvillus length	7	4	0.52	0.00086	0.00086	Cdhr2 Ezr Pls1 Vil1
GO:0045921	positive regulation of exocytosis	99	17	7.29	0.00086	0.00098	Clasp1 Clasp2 Doc2b F2rl1 Fga Fgb Fgg Gab2 Hgs Itgam Pdcd6ip Pla2g6 Rab27b Sdc4 Sdcbp Smpd3 Vamp7
GO:0016477	cell migration	1448	163	106.68	2.5e-08	0.00108	Ackr4 Acvrl1 Adam17 Adamts1 Adamts12 Adarb1 Adgrl3 Adtrp Afdn Agt Ajuba Anxa3 Apbb2 Apex1 Apoa1 Apoh Arhgap24 Arpc2 Aspm Atp5a1 Atp7a Bcar1 Bex4 Camk2d Camsap3 Ccbe1 Ccdc141 Ccl27a Ccl28 Cd151 Cd300a Cd44 Cd63 Cd74 Cdk5r1 Cdkl5 Celsr3 Cib1 Clasp1 Clasp2 Col1a1 Coro1b Cxcl14 Cxcr4 Cxcr6 Dab2 Dab2ip Dapk2 Dclk1 Dcn Ddx58 Depdc1b Dixdc1 Dpp4 Dusp22 Ecm1 Egfl7 Egr1 Enpep Epha3 Ephb4 Eps8 Evl F2rl1 Fb…
GO:0034375	high-density lipoprotein particle remode...	12	5	0.88	0.0011	0.0011	Abca5 Apoa1 Apoa2 Apom Lipc
GO:0043691	reverse cholesterol transport	12	5	0.88	0.0011	0.0011	Abca5 Apoa1 Apoa2 Apoa4 Apom
GO:0055091	phospholipid homeostasis	12	5	0.88	0.0011	0.0011	Apoa1 Fabp3 Hnf4a Lyst Rcn3
GO:0090090	negative regulation of canonical Wnt sig...	119	19	8.77	0.00111	0.00111	Amer2 Axin1 Csnk1a1 Ctnnd1 Cyld Dab2 Dab2ip Egr1 Gpc3 Grem1 Jade1 Lrp4 Mad2l2 Mapk14 Mdk Notum Pfdn5 Rbms3 Tmem131l
GO:0051085	chaperone cofactor-dependent protein ref...	30	8	2.21	0.00115	0.00115	Bag1 Cd74 Dnajb4 Dnajb5 Dnajc18 Ero1l Hspa13 Hsph1
GO:0006882	cellular zinc ion homeostasis	24	7	1.77	0.00132	0.00136	Atp7b Mt2 Slc30a7 Slc39a5 Slc39a6 Slc39a7 Slc39a8
GO:0030279	negative regulation of ossification	96	12	7.07	0.04938	0.00136	Ahsg Calca Cited1 Ecm1 Gfra4 Grem1 Lrp4 Ltbp3 Mdk Nbr1 P2ry2 Tph1
GO:0006622	protein targeting to lysosome	18	6	1.33	0.00136	0.00136	Ap4m1 Gnptab Hgs Lamp2 Ncoa4 Sorl1
GO:0043491	protein kinase B signaling	186	27	13.7	0.00055	0.00141	Adtrp C1qtnf1 Cib1 F10 Fgf2 Gas6 Hpse Inpp4b Itsn1 Lemd2 Lin28a Lox Mtm1 Myorg Pax2 Pear1 Pik3cg Plk3 Ptprj Rcn3 Rps6kb2 Sesn3 Sh2b3 Smpd3 Src Thpo Zfp36l1
GO:0051403	stress-activated MAPK cascade	257	32	18.93	0.0025	0.00148	Agt Axin1 Cryab Cyld Dab2 Dab2ip Dixdc1 Dtnbp1 Dusp22 Eif2ak2 Ezr F2rl1 Fgfr3 Fzd5 Hsph1 Il1a Ltbr Map3k10 Mapk11 Mapk14 Myd88 Nbr1 Pafah1b1 Serpinf2 Sphk1 Stradb Taok3 Tlr3 Tpbpa Trf Zeb2 Zfp36l1
GO:0006974	cellular response to DNA damage stimulus	740	96	54.52	3.8e-08	0.00152	Abraxas1 Alkbh8 Apex1 Ash2l Atf2 Bad Bcl2l2 Casp9 Ccdc155 Cd44 Cd74 Cdc7 Cdip1 Cdkn1a Cebpg Cep63 Chaf1b Chchd4 Cib1 Ctc1 Dgkz Donson Egln3 Ercc2 Eya3 Faap20 Fancg Fancm Fbxo31 Fbxo6 Fem1b Fignl2 Grb2 Gtf2h4 Herc2 Hipk1 Hmces Hnrnpk Hus1 Ino80d Kat5 Macrod2 Mad2l2 Mapk14 Mcm5 Mcm8 Mcm9 Mcrs1 Mdm2 Mgme1 Mlh1 Mms22l Mnat1 Morc2a Morf4l1 Nacc2 Neil3 Nek6 Nsmce2 Pagr1a Parp1 Pidd1 Plk3 Pnkp Pold1 Pol…
GO:0006029	proteoglycan metabolic process	79	14	5.82	0.00175	0.0016	Adamts12 Chpf Chst11 Col11a1 Col2a1 Dcn Hpse Hs3st1 Hs6st1 Ihh Lipc Man1c1 Ndnf Sulf1
GO:0046850	regulation of bone remodeling	60	9	4.42	0.0307	0.00161	Ahsg Fgfr3 Grem1 Inpp4b Itgav Ltbp3 Mdk Suco Trf
GO:0021540	corpus callosum morphogenesis	8	4	0.59	0.00161	0.00161	Nin Pafah1b1 Tsku Zeb2
GO:0048478	replication fork protection	8	4	0.59	0.00161	0.00161	Donson Timeless Tipin Zfp830
GO:1900264	positive regulation of DNA-directed DNA ...	8	4	0.59	0.00161	0.00161	Chtf18 Chtf8 Dscc1 Rfc3
GO:0061099	negative regulation of protein tyrosine ...	27	6	1.99	0.01224	0.00168	Dusp22 Ggnbp2 Mvp Ptk6 Ptpn2 Zgpat
GO:0032012	regulation of ARF protein signal transdu...	19	6	1.4	0.00186	0.00186	Arfgap1 Cyth4 Git1 Iqsec2 Mapre2 Psd3
GO:0070208	protein heterotrimerization	19	6	1.4	0.00186	0.00186	C1qtnf1 Col1a1 Col1a2 Col6a1 Col6a2 Gnb1
GO:0001525	angiogenesis	513	66	37.8	6.7e-06	0.00211	Acvrl1 Adamts1 Adm2 Adtrp Agt Angptl4 Anpep Anxa2 Anxa3 Apela Apoh Arhgap24 Atf2 C6 Ccbe1 Cd59a Cib1 Col8a2 Cxcr4 Cysltr2 Dab2ip Dcn Ddah1 Ecm1 Egfl7 Enpep Ephb4 Fgf2 Fgf9 Flt1 Fn1 Fzd5 Grem1 Gtf2i Hgs Hpse Hs6st1 Hspg2 Ihh Il1a Itgav Jcad Lemd3 Mapk14 Mdk Ndnf Pde3b Pik3cg Plg Pnpla6 Ppp1r16b Rnf213 Robo1 Robo4 Runx1 Serpinf1 Slit2 Sphk1 Sulf1 Synj2bp Tbx4 Tcf4 Tert Thsd7a Tlr3 Ubp1
GO:0051209	release of sequestered calcium ion into ...	115	13	8.47	0.08071	0.00225	Ank2 Camk2d Chd7 Cherp Ero1l F2 Fgf2 Glp1r Gpr39 Htr2b Itgav Itpr1 Plce1
GO:0006869	lipid transport	339	48	24.98	9.9e-06	0.00245	Abca5 Abca6 Abca8a Abcc2 Agt Ano7 Anxa2 Apoa1 Apoa2 Apoa4 Apob Apoc1 Apoc2 Apoh Apom Aqp8 Atp8a2 Atp8b1 Atp8b2 C1qtnf1 Dab2 Fabp3 Hrh2 Il1a Itgav Lipc Mfsd2b Nr1h3 Osbpl11 Osbpl6 Osbpl9 P2ry2 Pcsk9 Pla2g12b Pla2g6 Plin2 Plscr3 Runx1 Sgpp1 Slc10a6 Slc27a2 Slc5a8 Slco1b2 Soat2 Sorl1 Stra6l Vamp7 Xkr9
GO:0045723	positive regulation of fatty acid biosyn...	24	6	1.77	0.00673	0.00246	Agt Apoa4 Apoc2 Cd74 Hnf4a Nr1h3
GO:0010804	negative regulation of tumor necrosis fa...	14	5	1.03	0.00246	0.00246	Apoa1 F2rl1 Gas6 Nr1h4 Ptpn2
GO:0042532	negative regulation of tyrosine phosphor...	14	5	1.03	0.00246	0.00246	Ggnbp2 Hnf4a Pibf1 Ptpn2 Sh2b3
GO:0090331	negative regulation of platelet aggregat...	14	5	1.03	0.00246	0.00246	Abat Adamts18 C1qtnf1 Fgg Sh2b3
GO:1901016	regulation of potassium ion transmembran...	59	8	4.35	0.06662	0.00274	Ank2 Atp1b1 Cacna1d Fhl1 Kcnc1 Kcnrg Neto2 Wwp2
GO:0010873	positive regulation of cholesterol ester...	9	4	0.66	0.00274	0.00274	Agt Apoa1 Apoa2 Apoa4
GO:0010898	positive regulation of triglyceride cata...	9	4	0.66	0.00274	0.00274	Aadac Apoa4 Apoc2 Apoh
GO:0034372	very-low-density lipoprotein particle re...	9	4	0.66	0.00274	0.00274	Apoa1 Apoa2 Apoa4 Lipc
GO:0050882	voluntary musculoskeletal movement	9	4	0.66	0.00274	0.00274	Itpr1 Map1a Parp1 Spr
GO:2001187	positive regulation of CD8-positive, alp...	9	4	0.66	0.00274	0.00274	Cd244a H2-T23 Nckap1l Runx1
GO:0009267	cellular response to starvation	143	18	10.54	0.01793	0.00291	Alb Angptl4 Cdkn1a Clec16a Dsc2 Eif2ak2 Foxa3 Gabarapl1 Gas6 Lamp2 Nuak2 Pck1 Pcsk9 Pik3r4 Sesn3 Slc39a5 Usp33 Wdr45
GO:0071168	protein localization to chromatin	28	7	2.06	0.00348	0.00327	Esr1 Ezh2 Hdac8 Lemd2 Mcm8 Mcm9 Pphln1
GO:0045944	positive regulation of transcription by ...	1223	118	90.1	0.00147	0.0033	Acvrl1 Arhgef10l Arnt Ash1l Ash2l Atf1 Atf2 Bag1 Bex2 Brd4 Caprin2 Carf Ccnt2 Cebpd Cebpg Chd6 Chd7 Crtc1 Csrnp1 Dab2 Dab2ip Dcn Ddx58 E2f6 Eaf1 Efcab7 Egr1 Elf4 Epc1 Ercc2 Esr1 Esrrb F2rl1 Fgf2 Foxa3 Foxj1 Fzd5 Gabpb2 Glp1r Gnl3 Grem1 Hdac8 Helz2 Hnf4a Hnrnpk Hoxa10 Hsph1 Ihh Ikzf1 Il1a Irf5 Irf6 Kat5 Kdm3a Klf9 Kmt2c Lhx6 Lpin2 Lum Maff Mapk14 Mcf2l Mcrs1 Mef2a Meis2 Mitf Mnat1 Nfib Nfix Nr1h3 …
GO:0050775	positive regulation of dendrite morphoge...	55	12	4.05	0.00055	0.00344	Afdn Anapc2 Caprin2 Cdkl3 Cdkl5 Fbxo31 Lrp8 Opa1 Pafah1b1 Ptprf Tbc1d24 Vamp7
GO:0021819	layer formation in cerebral cortex	15	5	1.11	0.00347	0.00347	Cdk5r1 Dab2ip Lrp8 Mboat7 Pafah1b1
GO:1903543	positive regulation of exosomal secretio...	15	5	1.11	0.00347	0.00347	Hgs Pdcd6ip Sdc4 Sdcbp Smpd3
GO:0051084	'de novo' posttranslational protein fold...	35	11	2.58	2.7e-05	0.00353	Bag1 Cd74 Chchd4 Dnajb4 Dnajb5 Dnajc18 Entpd5 Ero1l Hspa13 Hsph1 Selenof
GO:0033085	negative regulation of T cell differenti...	10	5	0.74	0.0004	0.00356	Foxj1 Ihh Ptpn2 Tmem131l Zfp608
GO:0032803	regulation of low-density lipoprotein pa...	5	3	0.37	0.00357	0.00357	Anxa2 Mylip Pcsk9
GO:0033031	positive regulation of neutrophil apopto...	5	3	0.37	0.00357	0.00357	Cd44 Hcar2 Pik3cd
GO:0038163	thrombopoietin-mediated signaling pathwa...	5	3	0.37	0.00357	0.00357	Cib1 Sh2b3 Thpo
GO:0060689	cell differentiation involved in salivar...	5	3	0.37	0.00357	0.00357	Clcn2 Ctnnd1 Nfib
GO:0072385	minus-end-directed organelle transport a...	5	3	0.37	0.00357	0.00357	Bicd1 Dync1h1 Kifc1
GO:1900372	negative regulation of purine nucleotide...	5	3	0.37	0.00357	0.00357	Hpca Parp1 Pid1
GO:2001184	positive regulation of interleukin-12 se...	5	3	0.37	0.00357	0.00357	Mapk11 Mapk14 Mdk
GO:0061045	negative regulation of wound healing	71	23	5.23	6.4e-10	0.00407	Abat Adamts18 Adtrp Anxa2 Apoh C1qtnf1 Cd109 Cdkn1a Cdkn1b Clasp1 Clasp2 F2 Fga Fgb Fgf2 Fgg Kng1 Kng2 Plg Proc Serpinf2 Sh2b3 Tfpi
GO:0050919	negative chemotaxis	44	9	3.24	0.00421	0.00421	Apoa1 Igfals Itgav Lgr4 Robo1 Sema4g Slit1 Slit2 Slit3
GO:0048857	neural nucleus development	22	6	1.62	0.00423	0.00423	Aldh1a3 Cdk5r1 Fgf2 Fgfr3 Kirrel3 Nfib
GO:0000183	rDNA heterochromatin assembly	10	4	0.74	0.0043	0.0043	Naa40 Phf8 Suv39h1 Ubtf
GO:0034380	high-density lipoprotein particle assemb...	10	4	0.74	0.0043	0.0043	Apoa1 Apoa2 Apoa4 Apom
GO:0140052	cellular response to oxidised low-densit...	10	4	0.74	0.0043	0.0043	Adtrp Cd68 Myd88 Smpd3
GO:2000347	positive regulation of hepatocyte prolif...	10	4	0.74	0.0043	0.0043	Cflar Hpn Itpr1 Mdk
GO:1902042	negative regulation of extrinsic apoptot...	29	7	2.14	0.0043	0.0043	Cflar Dapk1 Fga Fgb Fgg Tnfrsf22 Tnfrsf23
GO:0016525	negative regulation of angiogenesis	112	15	8.25	0.01745	0.00442	Adamts1 Agt Apoh Atf2 Cd59a Dab2ip Dcn Gtf2i Hgs Pde3b Plg Serpinf1 Sulf1 Synj2bp Tcf4
GO:0002042	cell migration involved in sprouting ang...	55	8	4.05	0.04719	0.00474	Adtrp Cib1 Ephb4 Fgf2 Grem1 Jcad Robo1 Slit2
GO:0016540	protein autoprocessing	16	5	1.18	0.00474	0.00474	Capn2 Parp1 Pcsk9 Pidd1 Tmprss2
GO:0033036	macromolecule localization	2944	314	216.9	1.9e-12	0.00475	4933427D14Rik A1cf Abat Abca5 Abca6 Abca8a Abcc2 Abhd17a Adtrp Afdn Agt Ajuba Amn Ank2 Anks4b Ano1 Ano7 Anxa2 Ap3m2 Ap3s1 Ap4m1 Ap5m1 Apoa1 Apoa2 Apoa4 Apob Apoc1 Apoc2 Apoh Apom Aqp8 Arfgap1 Arl1 Arl4a Arpc2 Atp1b1 Atp8a2 Atp8b1 Atp8b2 Aurka Bad Bag1 Bag3 Bbs9 Bicd1 Birc5 Blzf1 C1qtnf1 Cacna1d Cacnb1 Camk2d Camsap3 Capn10 Cchcr1 Cct8 Cd244a Cd63 Cd68 Cd74 Cdk5r1 Cdkn1a Celsr3 Cep250 Cep63 Chchd1…
GO:0071539	protein localization to centrosome	33	8	2.43	0.00224	0.00535	4933427D14Rik Aurka Bicd1 Cep250 Cep63 Golgb1 Nedd1 Pibf1
GO:0042147	retrograde transport, endosome to Golgi	79	13	5.82	0.0049	0.00539	Arl1 Dctn1 Evi5 Gga1 Ric1 Stx5a Tmem87a Tmem87b Trim27 Vps26a Vps50 Vps52 Vps53
GO:0010171	body morphogenesis	62	11	4.57	0.00521	0.0054	Ankrd11 Clasp1 Clasp2 Col1a1 Csrnp1 Gatad2a Gnas Gpc3 Ihh Mab21l2 Specc1l
GO:1900026	positive regulation of substrate adhesio...	38	8	2.8	0.00569	0.00569	Apoa1 Arpc2 Cib1 Cspg5 Dab2 Mdk Net1 Rreb1
GO:0006897	endocytosis	623	66	45.9	0.00186	0.00573	Amn Ank2 Anxa2 Apoc2 Arfgap1 Bicd1 Cd151 Cd300a Cd63 Clcn5 Clint1 Colec12 Cubn Dab2 Dnajc6 Dtnbp1 Ehd1 Epha3 Ezr F2rl1 Fcgr3 Fcho1 Fkbp15 Gapvd1 Gpc3 Grb2 Grem1 Hnrnpk Hpca Hspg2 Htr2b Ighd Itsn1 Lmbr1l Lrp11 Lrp2 Lrp4 Lrp8 March2 Nckap1l Nr1h3 Pcsk9 Pear1 Pik3cg Rab17 Rab27b Rab31 Reps1 Rhobtb2 Sag Sdcbp Sh3bp1 Slc9a3 Snx18 Sorl1 Sphk1 Src Synj2bp Synrg Trf Trip10 Usp33 Vamp4 Vamp7 Vtn Xkr9
GO:0048812	neuron projection morphogenesis	677	78	49.88	5.6e-05	0.00617	Abi1 Adarb1 Adnp Afdn Anapc2 Apbb2 Arhgef28 Atl1 Atp7a Atp8a2 Aurka Btbd3 Caprin2 Ccdc141 Cdk5r1 Cdkl3 Cdkl5 Celsr3 Clasp2 Cxcr4 Cyfip2 Dab2ip Dclk1 Dixdc1 Dpysl4 Dtnbp1 Elavl4 Epb41l3 Epha3 Epha7 Ephb4 Ephb6 Evl Fbxo31 Fgfr3 Fn1 Gas7 Hdac6 Hnrnpk Igfals Jade2 Kirrel3 L1cam Lgr4 Lpar3 Lrp2 Lrp4 Lrp8 Map1a Mef2a Mycbp2 Nckap1l Nefh Nek3 Nfib Nin Ntn3 Opa1 Pafah1b1 Phactr1 Prtg Ptprf Rbfox2 Rnf157 …
GO:0050892	intestinal absorption	37	9	2.73	0.00118	0.00627	Abcg2 Apoa1 Apoa2 Apoa4 Ezr Pls1 Slc5a1 Vdr Vil1
GO:0007159	leukocyte cell-cell adhesion	319	33	23.5	0.03057	0.00628	Adtrp Apoa4 Ass1 Bad Ccdc88b Ccl28 Cd244a Cd300a Cd44 Cd74 Cd83 Cyld Dpp4 Dusp22 Ephb4 Ephb6 Foxj1 H2-T23 Hsph1 Ihh Ikzf1 Itgam L1cam Lgals8 Mdk Nckap1l Ptpn2 Rc3h2 Runx1 Sdc4 Tmem131l Tnip1 Zfp608
GO:0007202	activation of phospholipase C activity	17	5	1.25	0.00631	0.00631	Agt Arhgap6 Gpr55 Htr2b Nmur1
GO:0051895	negative regulation of focal adhesion as...	17	5	1.25	0.00631	0.00631	Acvrl1 Arhgap6 Clasp2 Dusp22 Src
GO:0045814	negative regulation of gene expression, ...	59	11	4.35	0.00351	0.00632	Epc1 Ezh2 Hira Mier1 Morc2a Morf4l1 Mthfr Pphln1 Suv39h1 Trim27 Uty
GO:0010458	exit from mitosis	28	7	2.06	0.00348	0.00634	Birc5 Cdkn1b Cdkn1c Clasp1 Clasp2 Eps8 Ube2s
GO:0032463	negative regulation of protein homooligo...	11	4	0.81	0.00636	0.00636	Crbn Cryab Lamp2 Src
GO:0033700	phospholipid efflux	11	4	0.81	0.00636	0.00636	Apoa1 Apoa2 Apoa4 Apoc2
GO:0048312	intracellular distribution of mitochondr...	11	4	0.81	0.00636	0.00636	Cluh Opa1 Synj2 Synj2bp
GO:0097421	liver regeneration	11	4	0.81	0.00636	0.00636	Aurka Ezh2 Itpr1 Vtn
GO:0042059	negative regulation of epidermal growth ...	25	5	1.84	0.03322	0.00636	Dab2ip Ptpn2 Ptprf Ptprj Zgpat
GO:2000352	negative regulation of endothelial cell ...	31	7	2.28	0.00637	0.00637	Angptl4 Fga Fgb Fgg Gas6 Ndnf Tert
GO:0044770	cell cycle phase transition	393	59	28.95	1.3e-07	0.00643	Abraxas1 Adam17 Adamts1 Anapc11 Anapc15 Anapc5 Apex1 Birc5 Brd4 Camk2d Ccnb2 Ccnj Cdc25b Cdc7 Cdk14 Cdk2ap2 Cdkn1a Cdkn1b Cdkn1c Clasp1 Clasp2 Ctc1 Dbf4 Dgkz Donson E2f6 Eps8 Ercc2 Esrrb Ezh2 Fbxo31 Fhl1 Hus1 Jade1 Lcmt1 Mdm2 Mnat1 Nacc2 Nasp Nek6 Nsmce2 Pagr1a Pbx1 Phf8 Pidd1 Plk3 Rint1 Rpl17 Taok3 Tert Timeless Tipin Tpr Tpra1 Ube2s Upf1 Zfp36l1 Zfp655 Zfp830
GO:0030177	positive regulation of Wnt signaling pat...	132	22	9.73	0.00025	0.00657	Aspm Caprin2 Col1a1 Dab2 Depdc1b Dixdc1 Fam53b Fgf2 Fgf9 Fgfr3 Gpc3 Lgr4 Macf1 Plekha4 Src Sulf1 Tert Wls Wnk2 Xiap Zbed3 Zeb2
GO:0001654	eye development	397	36	29.25	0.11485	0.00668	Acvrl1 Adamts18 Aldh1a3 Atp8a2 Cdkn1b Cdkn1c Chd7 Clcn2 Col8a2 Cryab Crybg3 Crygn Fgf2 Fgf9 Fgfr3 Flt1 Fzd5 Gnb1 Hipk1 Ihh Ikzf1 Kmt2c Mab21l2 Meis2 Mitf Ninj1 Pax2 Pde6c Pfdn5 Phactr4 Sdk2 Sipa1l3 Slc39a5 Tsku Zdhhc16 Zeb2
GO:0007548	sex differentiation	288	29	21.22	0.05401	0.00668	Adamts1 Afp Agt Ahsg Aspm Bcl2l2 Chd7 Col9a3 Dhh Esr1 Fancg Fgf9 Fkbp4 Hnf4a Hnrnpk Hoxa10 Il1a Itgav Lgr4 Lrp2 Nefh Pbx1 Runx1 Serpinb6b Sox3 Src Srd5a1 Zfp830 Zfpm2
GO:0010988	regulation of low-density lipoprotein pa...	13	5	0.96	0.00168	0.00672	Anxa2 Hnrnpk Mylip Nr1h4 Pcsk9
GO:0046031	ADP metabolic process	94	10	6.93	0.15358	0.00673	Ak1 Aldob Ampd3 Bad Entpd5 Esrrb Galk1 Gapdh Hkdc1 Pfkfb2
GO:0000915	actomyosin contractile ring assembly	6	3	0.44	0.00674	0.00674	Kif23 Pdcd6ip Racgap1
GO:0010756	positive regulation of plasminogen activ...	6	3	0.44	0.00674	0.00674	Hpn Meltf Plgrkt
GO:0015074	DNA integration	6	3	0.44	0.00674	0.00674	Gin1 Nynrin Zfp869
GO:0034382	chylomicron remnant clearance	6	3	0.44	0.00674	0.00674	Apoc2 Lipc Lmf1
GO:0043504	mitochondrial DNA repair	6	3	0.44	0.00674	0.00674	Chchd4 Mgme1 Parp1
GO:0052150	modulation by symbiont of host apoptotic...	6	3	0.44	0.00674	0.00674	Bad Gapdh Serpinb9
GO:0071671	regulation of smooth muscle cell chemota...	6	3	0.44	0.00674	0.00674	Coro1b Mdk Slit2
GO:1900748	positive regulation of vascular endothel...	6	3	0.44	0.00674	0.00674	Ccbe1 Jcad Robo1
GO:1903551	regulation of extracellular exosome asse...	6	3	0.44	0.00674	0.00674	Pdcd6ip Sdc4 Sdcbp
GO:1903689	regulation of wound healing, spreading o...	6	3	0.44	0.00674	0.00674	Clasp1 Clasp2 Rreb1
GO:0090263	positive regulation of canonical Wnt sig...	101	15	7.44	0.00702	0.00702	Aspm Caprin2 Col1a1 Fam53b Fgf2 Fgf9 Fgfr3 Gpc3 Lgr4 Plekha4 Src Wls Wnk2 Xiap Zbed3
GO:0000122	negative regulation of transcription by ...	857	85	63.14	0.00309	0.00757	Ajuba Ankrd2 Atf2 Axin1 Bag3 Cc2d1a Cdkn1c Cnot2 Dab2ip Dnajb4 Dnajb5 Dusp22 E2f6 Egr1 Epc1 Esr1 Ezh2 Ezr Fgf9 Fgfr3 Foxj1 Gatad2a Gbp4 H3c14 Hba-x Hbb-bh1 Hbb-y Hif1an Hipk1 Hnrnpk Ikzf1 Jarid2 Kat5 Lin37 Lmcd1 Mad2l2 Mdm2 Mef2a Mier1 Mitf Mnt Mxd3 Myef2 Mypop Nacc2 Nfib Nfix Nr1h3 Nr1h4 Nr6a1 Nsd1 Pax2 Pde2a Pkig Plk3 Ppp1r15a Ptpn2 Rfx5 Rreb1 Runx1 Samd11 Sap130 Spdef Stat6 Suv39h1 Taf1 Tbx15 …
GO:0031122	cytoplasmic microtubule organization	59	12	4.35	0.00107	0.00758	Axin1 Camsap3 Ccdc88b Cib1 Clasp1 Dync1h1 Ezr Fignl2 Hook2 Kpnb1 Pafah1b1 Plk3
GO:0042447	hormone catabolic process	18	5	1.33	0.00822	0.00822	Acaa1a Hsd11b1 Pon3 Srd5a1 Ugt1a7c
GO:0051493	regulation of cytoskeleton organization	538	66	39.64	3.1e-05	0.00856	Add3 Ankrd23 Apoa1 Arhgap18 Arhgap6 Arhgef10l Arpc2 Bicd1 Camsap3 Capn2 Capn6 Ccl27a Cdk2ap2 Cdk5r1 Cdkn1b Cep250 Cfl2 Cib1 Clasp1 Clasp2 Coro1b Cyld Dctn1 Dixdc1 Dync1h1 Epha3 Eps8 Evl F2rl1 Fhod3 Fkbp4 Gba2 Gpsm2 Grb2 Hdac6 Hsph1 Il1a Iqgap2 Kifc1 Limch1 Map1a Mapre2 Mdk Mycbp2 Myo3b Nckap1l Neb Nin Pafah1b1 Pdcd6ip Ppm1e Rassf7 Rbm14 Rhobtb2 Sdc4 Serpinf2 Sh3bp1 Slit2 Smc1a Specc1l Spef1l Spta…
GO:0019433	triglyceride catabolic process	26	10	1.92	8.1e-06	0.0089	Aadac Apoa1 Apoa4 Apob Apoc2 Apoh Lipc Lipe Pik3cg Sorl1
GO:0000380	alternative mRNA splicing, via spliceoso...	76	13	5.6	0.00348	0.00891	Celf1 Esrp2 Hnrnpm Mbnl2 Rbfox2 Rbm25 Rbm5 Rbmx Rsrc1 Sart3 Sfswap Srsf5 Wtap
GO:0031639	plasminogen activation	25	9	1.84	4.3e-05	0.00892	Anxa2 Apoh Fga Fgb Fgg Hpn Meltf Plgrkt Serpinf2
GO:0048813	dendrite morphogenesis	178	25	13.11	0.00139	0.00893	Abi1 Afdn Anapc2 Atp7a Btbd3 Caprin2 Cdk5r1 Cdkl3 Cdkl5 Dclk1 Dtnbp1 Elavl4 Fbxo31 Hdac6 Lrp4 Lrp8 Mef2a Opa1 Pafah1b1 Phactr1 Ptprf Rbfox2 Robo1 Tbc1d24 Vamp7
GO:0001682	tRNA 5'-leader removal	12	4	0.88	0.00899	0.00899	Pop1 Pop5 Pop7 Rpp40
GO:0045080	positive regulation of chemokine biosynt...	12	4	0.88	0.00899	0.00899	Cd74 Egr1 Myd88 Tlr3
GO:0010634	positive regulation of epithelial cell m...	143	17	10.54	0.03424	0.00904	Adam17 Agt Anxa3 Atp5a1 Bcar1 Ccbe1 Cib1 Clasp1 Clasp2 Fgf2 Gab2 Hdac6 Jcad Mapre2 Rreb1 Src Vil1
GO:0007026	negative regulation of microtubule depol...	33	7	2.43	0.00909	0.00909	Camsap3 Cib1 Clasp1 Clasp2 Hdac6 Map1a Specc1l
GO:0006506	GPI anchor biosynthetic process	31	7	2.28	0.00637	0.01012	Dpm1 Pigb Pigo Pigq Pigt Pigw Pigx
GO:0046827	positive regulation of protein export fr...	19	5	1.4	0.01048	0.01048	Bag3 Gas6 Mdm2 Tpr Xpo4
GO:0038066	p38MAPK cascade	48	8	3.54	0.02293	0.01112	Cyld Dab2ip Ezr Fgfr3 Hsph1 Mapk14 Sphk1 Zfp36l1
GO:0031023	microtubule organizing center organizati...	130	14	9.58	0.09779	0.01112	4933427D14Rik Aurka Bnip2 Cep250 Cep63 Clasp1 Clasp2 Dctn1 Kifc1 Nin Pafah1b1 Pdcd6ip Rbm14 Usp33
GO:0030212	hyaluronan metabolic process	27	6	1.99	0.01224	0.01112	Cd44 Fgf2 Itih2 Itih3 Itih4 Smpd3
GO:0060428	lung epithelium development	51	7	3.76	0.07886	0.01114	Fgfr3 Fgfr4 Foxj1 Gpsm2 Nfib Rcn3 Spdef
GO:0071073	positive regulation of phospholipid bios...	12	4	0.88	0.00899	0.01114	Capn2 Fabp3 Htr2b Nr1h4
GO:0002072	optic cup morphogenesis involved in came...	7	3	0.52	0.01115	0.01115	Aldh1a3 Pax2 Phactr4
GO:0006621	protein retention in ER lumen	7	3	0.52	0.01115	0.01115	Grik5 Kdelr1 Rer1
GO:0010519	negative regulation of phospholipase act...	7	3	0.52	0.01115	0.01115	Anxa8 Bicd1 Rgs2
GO:0010533	regulation of activation of Janus kinase...	7	3	0.52	0.01115	0.01115	Agt Cd300a Hnf4a
GO:0021800	cerebral cortex tangential migration	7	3	0.52	0.01115	0.01115	Lhx6 Robo1 Slit2
GO:0051918	negative regulation of fibrinolysis	7	3	0.52	0.01115	0.01115	Apoh Plg Serpinf2
GO:1903003	positive regulation of protein deubiquit...	7	3	0.52	0.01115	0.01115	Sart3 Tank Tnip1
GO:1903753	negative regulation of p38MAPK cascade	7	3	0.52	0.01115	0.01115	Cyld Ezr Hsph1
GO:2000858	regulation of aldosterone secretion	7	3	0.52	0.01115	0.01115	Agt C1qtnf1 Dab2
GO:0014911	positive regulation of smooth muscle cel...	62	15	4.57	3.3e-05	0.01195	Adamts1 Agt Arpc2 Atp7a Camk2d Egr1 Fga Fgf9 Mdk Mdm2 P2ry2 Src Ssh1 Tert Vtn
GO:0071897	DNA biosynthetic process	167	26	12.3	0.00023	0.01198	Acvrl1 Camk2d Cct8 Cdkn1a Chtf18 Chtf8 Ctc1 Dnajc2 Dscc1 Faap20 Fgf2 Fgfr4 Grem1 Lox Mcrs1 Pnkp Pold1 Poli Rfc3 Smpd3 Sphk1 Src Tcp1 Tent4b Tert Tk2
GO:0010717	regulation of epithelial to mesenchymal ...	87	14	6.41	0.0044	0.01213	Clasp1 Clasp2 Col1a1 Dab2 Dab2ip Epha3 Ezh2 Grem1 Hpn Mad2l2 Mdk Sdcbp Tgfb1i1 Vasn
GO:0040018	positive regulation of multicellular org...	43	8	3.17	0.01218	0.01218	Agt Atp8a2 Celf1 Chd7 Ezr Ikzf1 Pls1 Vil1
GO:1903489	positive regulation of lactation	27	6	1.99	0.01224	0.01224	Prl2b1 Prl2c5 Prl7a2 Prl7c1 Prl8a8 Prl8a9
GO:0006491	N-glycan processing	13	4	0.96	0.01224	0.01224	Ganab Gnptab Man1c1 Man2a2
GO:0045899	positive regulation of RNA polymerase II...	13	4	0.96	0.01224	0.01224	Esr1 Ikzf1 Psmc4 Psmc5
GO:1904707	positive regulation of vascular smooth m...	35	7	2.58	0.01259	0.01259	Adamts1 Agt Camk2d Fgf2 Fgf9 Mdm2 Tert
GO:0070301	cellular response to hydrogen peroxide	89	12	6.56	0.02989	0.01288	Ankzf1 Apex1 Ezh2 Hdac6 Hsph1 Net1 Pax2 Pink1 Smpd3 Sphk1 Src Stat6
GO:0008283	cell population proliferation	1996	204	147.06	6.6e-07	0.0131	Acvrl1 Adam17 Adam33 Adamts1 Adarb1 Afdn Agt Ankrd2 Anxa2 Apela Apoa1 Apoh Ash2l Aspm Atf2 Atp5a1 Atp7a Bad Bcl2l2 Bex4 Birc5 Bnc1 Brd4 Camk2d Ccdc88b Cd109 Cd151 Cd244a Cd300a Cd44 Cd74 Cdc7 Cdkn1a Cdkn1b Cfb Cflar Cherp Chst11 Cib1 Cip2a Clmn Col8a2 Ctc1 Ctps Cxcr4 Dab2 Dab2ip Ddah1 Dixdc1 Dph1 Dpp4 Dusp22 Ecm1 Egfl7 Egln3 Egr1 Eif2ak2 Elf4 Enpep Enpp7 Entpd5 Ephb6 Ercc2 Esr1 Esrp2 Esrrb Ezh2 F…
GO:0035855	megakaryocyte development	20	5	1.47	0.01315	0.01315	Abi1 Pip4k2a Sh2b3 Thpo Zfp385a
GO:0006953	acute-phase response	41	7	3.02	0.02871	0.01463	Ahsg F2 Fn1 Il1a Itih4 Serpina1b Serpinf2
GO:0030511	positive regulation of transforming grow...	28	6	2.06	0.01463	0.01463	Adam17 Axin1 Dab2 Rnf111 Sdcbp Tgfb1i1
GO:0036297	interstrand cross-link repair	28	6	2.06	0.01463	0.01463	Faap20 Fancg Mcm8 Mcm9 Rad51ap1 Xpa
GO:0032984	protein-containing complex disassembly	205	31	15.1	0.0001	0.01523	Add3 Arpc2 Camsap3 Cebpg Cfl2 Chchd10 Cib1 Clasp1 Clasp2 Clec16a Dnajc6 Eps8 Evl F2rl1 Hdac6 Irgm2 Lamp2 Map1a Nedd1 Ogfod1 Pbrm1 Pym1 Sh3bp1 Smarcc1 Snx14 Specc1l Sptan1 Upf1 Vil1 Vill Zfand1
GO:0030832	regulation of actin filament length	179	23	13.19	0.00646	0.01533	Add3 Arhgap18 Arpc2 Cfl2 Coro1b Eps8 Evl F2rl1 Fhod3 Gba2 Grb2 Iqgap2 Myo3b Nckap1l Neb Rhobtb2 Sh3bp1 Slit2 Specc1l Sptan1 Trim27 Vil1 Vill
GO:0042359	vitamin D metabolic process	16	4	1.18	0.02611	0.01546	Cyp24a1 Fgfr4 Gc Vdr
GO:0040001	establishment of mitotic spindle localiz...	33	5	2.43	0.09187	0.01546	Clasp1 Dctn1 Gpsm2 Kpnb1 Pafah1b1
GO:0061042	vascular wound healing	9	3	0.66	0.02394	0.01547	Cxcr4 Hpse Ndnf
GO:0019511	peptidyl-proline hydroxylation	11	3	0.81	0.04211	0.01547	Egln3 Ogfod1 P3h2
GO:0051154	negative regulation of striated muscle c...	41	5	3.02	0.18152	0.01547	Ankrd2 Cflar Ezh2 Rgs2 Ybx1
GO:1902110	positive regulation of mitochondrial mem...	32	3	2.36	0.42278	0.0155	Atf2 Chchd10 Stpg1
GO:0086003	cardiac muscle cell contraction	66	5	4.86	0.54124	0.01551	Ank2 Cacna1d Camk2d Dsc2 Uty
GO:0009792	embryo development ending in birth or eg...	841	80	61.96	0.0111	0.01566	9130008F23Rik Abcg2 Abi1 Acvrl1 Ankrd11 Apob Arnt Atp1b1 Axin1 Bnip2 Brd4 C6 Camsap3 Capn2 Ccnb2 Cdk5r1 Cdkn1c Chd7 Chst11 Cited1 Cnot2 Col11a1 Col1a1 Col2a1 Colec10 Cubn Dab2 Ercc2 Esrrb Etl4 Fgf2 Fgf9 Fzd5 Gatad2a Ggnbp2 Gnas Grb2 Hs6st1 Hspg2 Hus1 Ihh Itgav Itpk1 Kdm6a Klhl12 Lrp2 Luzp1 Maff Meg3 Mthfr Myo18b Nasp Ocrl Opa1 Pax2 Pbrm1 Pbx1 Pdzk1 Phactr4 Plg Prickle2 Psmc4 Rmrp Runx1 Runx2 Sdc4…
GO:0043171	peptide catabolic process	25	7	1.84	0.00172	0.01609	Adamts13 Anpep Cpn1 Enpep Ggt1 Ggt5 Tpp1
GO:0034453	microtubule anchoring	26	7	1.92	0.0022	0.01609	Bicd1 Camsap3 Clasp1 Clasp2 Dctn1 Fopnl Nin
GO:0010955	negative regulation of protein processin...	29	7	2.14	0.0043	0.01609	Cst7 Ctla2a Mdm2 Serpinf2 Sirt4 Tmem98 Xiap
GO:0034116	positive regulation of heterotypic cell-...	14	4	1.03	0.01616	0.01616	Cd44 Fga Fgb Fgg
GO:0090141	positive regulation of mitochondrial fis...	14	4	1.03	0.01616	0.01616	Dcn Ddhd1 Mief2 Pink1
GO:0030048	actin filament-based movement	112	12	8.25	0.12203	0.01622	Ank2 Apbb2 Cacna1d Camk2d Dsc2 Evl Myo19 Myo7a Shtn1 Sun2 Uty Vil1
GO:0006541	glutamine metabolic process	21	5	1.55	0.01623	0.01623	Ctps Ctps2 Glud1 Nr1h4 Sirt4
GO:2001224	positive regulation of neuron migration	21	5	1.55	0.01623	0.01623	Dab2ip Fbxo31 Mdk Shtn1 Tbc1d24
GO:0007178	transmembrane receptor protein serine/th...	357	42	26.3	0.00181	0.01651	Acvrl1 Adam17 Afp Apela Axin1 Cd109 Chst11 Cited1 Col1a2 Dab2 Dusp22 Egr1 Fgf9 Gpc3 Grem1 Hnf4a Htra3 Jade2 Lemd2 Lemd3 Lox Lrp2 Ltbp3 Mapk14 Meg3 Myd88 Nup93 Parp1 Rbm14 Rnf111 Runx2 Sdcbp Slc39a5 Smpd3 Sorl1 Src Sulf1 Synj2bp Tgfb1i1 Trf Trps1 Vasn
GO:0051180	vitamin transport	32	10	2.36	6.6e-05	0.01673	Amn Apoa1 Cubn Gc Lrp2 Slc19a1 Slc2a2 Slc2a3 Slc35f3 Stra6l
GO:0010803	regulation of tumor necrosis factor-medi...	30	9	2.21	0.00022	0.01676	Adam17 Apoa1 Cyld F2rl1 Gas6 Hipk1 Nr1h4 Ptpn2 Sphk1
GO:0048668	collateral sprouting	32	5	2.36	0.08272	0.01687	Epha7 Hdac6 Lpar3 Nin Zeb2
GO:0000052	citrulline metabolic process	8	3	0.59	0.01687	0.01687	Ass1 Ddah1 Otc
GO:0030300	regulation of intestinal cholesterol abs...	8	3	0.59	0.01687	0.01687	Apoa1 Apoa2 Apoa4
GO:0032534	regulation of microvillus assembly	8	3	0.59	0.01687	0.01687	Atp8b1 Hnf4a Pld1
GO:0034334	adherens junction maintenance	8	3	0.59	0.01687	0.01687	Afdn Camsap3 Kifc3
GO:0035385	Roundabout signaling pathway	8	3	0.59	0.01687	0.01687	Robo1 Slit2 Slit3
GO:0043983	histone H4-K12 acetylation	8	3	0.59	0.01687	0.01687	Brd4 Jade1 Jade2
GO:0045842	positive regulation of mitotic metaphase...	8	3	0.59	0.01687	0.01687	Anapc11 Anapc5 Nsmce2
GO:0061744	motor behavior	8	3	0.59	0.01687	0.01687	Adarb1 Dctn1 Dpp4
GO:0070314	G1 to G0 transition	8	3	0.59	0.01687	0.01687	Ezh2 Smpd3 Zfp503
GO:0071578	zinc ion import across plasma membrane	8	3	0.59	0.01687	0.01687	Slc39a5 Slc39a6 Slc39a8
GO:1901642	nucleoside transmembrane transport	8	3	0.59	0.01687	0.01687	Slc28a1 Slc29a1 Slc29a4
GO:2000096	positive regulation of Wnt signaling pat...	8	3	0.59	0.01687	0.01687	Dab2 Gpc3 Plekha4
GO:2000586	regulation of platelet-derived growth fa...	8	3	0.59	0.01687	0.01687	Lox Ptpn2 Src
GO:2000643	positive regulation of early endosome to...	8	3	0.59	0.01687	0.01687	Dab2 Ezr Vps11
GO:1904064	positive regulation of cation transmembr...	163	12	12.01	0.54427	0.01694	Agt Ank2 Atp1b1 Cacna1d Chchd10 F2 Gpr39 Kcnc1 Kcnj11 Pdzk1 Pink1 Wnk2
GO:0035264	multicellular organism growth	212	27	15.62	0.00381	0.01696	Adarb1 Agt Ankrd11 Atp8a2 Cdkn1c Celf1 Chd7 Ctc1 Ercc2 Ezr Gnas Ihh Ikzf1 Kdm6a Kmt2c Lncpint Meg3 Pls1 Rc3h2 Slc12a5 Smpd3 Spr Suv39h1 Vil1 Wdr11 Xpa Zfp36l1
GO:0043488	regulation of mRNA stability	98	13	7.22	0.02757	0.01724	Apex1 Elavl4 Fastkd3 Hnrnpm Larp1 Mettl14 Myd88 Myef2 Pum2 Tent4b Upf1 Ybx1 Zfp36l1
GO:0002092	positive regulation of receptor internal...	29	6	2.14	0.01733	0.01733	Cd63 Dab2 Dtnbp1 Grem1 Pcsk9 Synj2bp
GO:0006898	receptor-mediated endocytosis	222	29	16.36	0.0019	0.01758	Amn Anxa2 Apoc2 Bicd1 Cd300a Cd63 Cubn Dab2 Dnajc6 Dtnbp1 Ezr Fcho1 Grb2 Grem1 Hnrnpk Hpca Hspg2 Htr2b Lmbr1l Lrp2 Pcsk9 Rab31 Reps1 Sag Sdcbp Slc9a3 Synj2bp Trf Vtn
GO:0010811	positive regulation of cell-substrate ad...	127	21	9.36	0.00039	0.01764	Apoa1 Arpc2 Ccdc80 Ccl28 Cib1 Col16a1 Cspg5 Dab2 Emid1 Emilin3 Fn1 L1cam Mdk Ndnf Net1 Ninj1 Ptprj Rreb1 Rsu1 Sdc4 Vtn
GO:0055114	oxidation-reduction process	880	82	64.83	0.01642	0.01908	Aass Acaa1a Acad10 Acat3 Acox1 Acox2 Acox3 Agl Aifm3 Aldh16a1 Aldh7a1 Aldob Alkbh6 Alkbh8 Aox2 Apoa1 Apoa2 Atp5d Bckdhb Chchd4 Coq10a Cp Cpt1a Cyb561d1 Cyb5a Cyb5rl Cyp21a1 Cyp24a1 Cyp2ab1 Cyp2c23 Cyp2c70 Cyp3a13 Cyp4v3 Dcxr Degs2 Dhrs13 Dhrs4 Egln3 Enox1 Ero1l Esrrb Fabp3 Fastkd3 Fmo1 Foxred1 Gaa Glud1 Gnas Hif1an Hsd11b1 Ifi30 Kdm3a Kdm5d Kdm6a Lox Maob Mapk14 Marc1 Mthfr Ndufaf2 Ndufb8 Ndufs3 …
GO:0006644	phospholipid metabolic process	348	51	25.64	1.9e-06	0.01921	Ajuba Apoa1 Apoa2 Apoa4 Apoc2 Capn2 Dab2ip Dgkz Dpm1 Enpp7 Fabp3 Fam126a Fgf2 Fgfr3 Flt1 Gpat3 Htr2b Impa2 Inpp1 Inpp4b Ip6k2 Lipc Lyst Mboat7 Mtm1 Mtmr1 Nr1h4 Ocrl Pcsk9 Pigb Pigo Pigq Pigt Pigw Pigx Pik3cd Pik3cg Pik3r4 Pip4k2a Pla2g12b Pla2g3 Pla2g6 Plb1 Pld1 Plpp5 Pnpla6 Sgpp1 Smg1 Smpd3 Src Synj2
GO:0046854	phosphatidylinositol phosphorylation	38	7	2.8	0.01951	0.01951	Fam126a Impa2 Inpp1 Ip6k2 Pik3cd Pik3cg Smg1
GO:0046628	positive regulation of insulin receptor ...	22	5	1.62	0.01976	0.01976	Agt Nr1h4 Opa1 Sorl1 Src
GO:0051017	actin filament bundle assembly	165	22	12.16	0.00493	0.02004	Add3 Apoa1 Arhgap6 Arhgef10l Clasp1 Clasp2 Coro1b Eps8 Evl Ezr Fscn3 Gas7 Limch1 Phactr1 Pls1 Ppm1e Sdc4 Serpinf2 Shroom1 Src Tnfaip1 Vil1
GO:0046034	ATP metabolic process	245	23	18.05	0.13793	0.02028	Ak1 Aldob Ampd3 Atp1b1 Atp5a1 Atp5d Atp6v1a Atp7a Bad Chchd10 Cox7a2l Entpd5 Esrrb Galk1 Gapdh Hkdc1 Ndufb8 Nudt5 Parp1 Pde2a Pfkfb2 Pid1 Pink1
GO:0042744	hydrogen peroxide catabolic process	30	6	2.21	0.02034	0.02034	Apoa4 Gpx3 Hba-x Hbb-bh1 Hbb-y Pxdn
GO:0015031	protein transport	1807	187	133.13	9e-07	0.02069	A1cf Abat Adtrp Agt Amn Ank2 Ano1 Ap3m2 Ap3s1 Ap4m1 Ap5m1 Apoa1 Apoa2 Apob Apoc2 Arfgap1 Arl1 Arl4a Arpc2 Bad Bag3 Bbs9 Birc5 Blzf1 Cacna1d Cacnb1 Camsap3 Capn10 Cchcr1 Cd244a Cd63 Cd74 Cdk5r1 Cdkn1a Chchd4 Chml Cib1 Clec4n Col1a1 Copg2 Cox18 Cpt1a Cubn Dab2 Ddx58 Dnajc14 Dnlz Doc2b Dusp18 Efcab7 Ehd1 Ephb6 Evi5 Exoc4 Exoc8 Ezr F2rl1 Fam53b Fga Fgb Fgf9 Fgg Fn1 Fras1 Fzd5 Gapdh Gapvd1 Gas6 Gbp4 G…
GO:0042953	lipoprotein transport	15	4	1.11	0.02077	0.02077	Apob Apoc2 Cubn Lrp2
GO:0043116	negative regulation of vascular permeabi...	15	4	1.11	0.02077	0.02077	Ddah1 Pde2a Ptprj Slit2
GO:0006281	DNA repair	464	55	34.19	0.00033	0.02133	Abraxas1 Apex1 Ccdc155 Cdc7 Cebpg Chaf1b Chchd4 Ercc2 Eya3 Faap20 Fancg Fancm Fbxo6 Fignl2 Gtf2h4 Herc2 Hus1 Ino80d Kat5 Mad2l2 Mcm5 Mcm8 Mcm9 Mcrs1 Mgme1 Mlh1 Mms22l Mnat1 Morf4l1 Neil3 Nsmce2 Parp1 Pnkp Pold1 Poli Rad1 Rad51ap1 Rnaseh2a Rnf111 Rnf138rt1 Rtel1 Samhd1 Smc1a Smg1 Ssrp1 Suv39h1 Taok3 Tfpt Timeless Ube2d3 Ube2n Upf1 Usp51 Uvssa Xpa
GO:0048839	inner ear development	211	24	15.55	0.02253	0.02203	Aldh1a3 Alg10b Atp8a2 Atp8b1 Cdkn1b Cebpd Chd7 Col11a1 Col2a1 Cxcl14 Esrrb Fgf9 Fgfr3 H2-T23 Hpca Hpn Lrig1 Mcoln3 Mpv17 Myo3b Myo7a Pafah1b1 Pax2 Sdc4
GO:0046427	positive regulation of receptor signalin...	102	13	7.51	0.0367	0.02222	Agt Cd300a Fgfr3 Hnf4a Hpx Il10rb Pibf1 Prl2b1 Prl2c5 Prl7a2 Prl7c1 Prl8a8 Prl8a9
GO:1900087	positive regulation of G1/S transition o...	39	7	2.87	0.02231	0.02231	Adam17 Adamts1 Apex1 Dbf4 Mdm2 Rpl17 Tert
GO:0048863	stem cell differentiation	228	21	16.8	0.17144	0.02294	A2m Eif2ak2 Ercc2 Esr1 Esrrb Fgf2 Fn1 Grem1 Htr2b Jarid2 Kdm3a Klhl12 L3mbtl2 Lin28a Ltbp3 Pax2 Phactr4 Runx2 Sema4g Tcf7l1 Zeb2
GO:0007568	aging	247	20	18.2	0.36343	0.02295	Abat Apex1 Atp8a2 Capn10 Cd68 Cdkn1a Cdkn1c Ctc1 Ercc2 Grb2 Krt14 Lncpint Mapk14 Meg3 Mnt Nsmce2 Opa1 Prdm2 Suv39h1 Tert
GO:0002063	chondrocyte development	45	8	3.32	0.0159	0.02368	Chst11 Col11a1 Col6a1 Col6a2 Ecm1 Runx2 Smpd3 Sulf1
GO:0001958	endochondral ossification	31	6	2.28	0.0237	0.0237	Col1a1 Col2a1 Gnas Hspg2 Runx2 Smpd3
GO:0085029	extracellular matrix assembly	36	9	2.65	0.00095	0.02379	Agt Atp7a Clasp1 Clasp2 Col1a2 Ihh Lox Smpd3 Thsd4
GO:0010863	positive regulation of phospholipase C a...	26	8	1.92	0.0004	0.0238	Agt Arhgap6 Esr1 Fgf2 Flt1 Gpr55 Htr2b Nmur1
GO:0060351	cartilage development involved in endoch...	52	9	3.83	0.01289	0.02384	Anxa2 Col1a1 Col2a1 Col6a1 Col6a2 Hspg2 Ihh Scube2 Smpd3
GO:0031113	regulation of microtubule polymerization	53	7	3.9	0.09272	0.02391	Camsap3 Cdkn1b Clasp2 Dctn1 Fkbp4 Gba2 Nin
GO:0018158	protein oxidation	14	4	1.03	0.01616	0.02392	Apoa1 Apoa2 Chchd4 Lox
GO:0006013	mannose metabolic process	9	3	0.66	0.02394	0.02394	Man1c1 Man2a2 Man2c1
GO:0009221	pyrimidine deoxyribonucleotide biosynthe...	9	3	0.66	0.02394	0.02394	Cmpk2 Dctd Dut
GO:0015810	aspartate transmembrane transport	9	3	0.66	0.02394	0.02394	Lrrc8d Slc13a3 Slc25a22
GO:0015886	heme transport	9	3	0.66	0.02394	0.02394	Cubn Hpx Lrp2
GO:0021957	corticospinal tract morphogenesis	9	3	0.66	0.02394	0.02394	Nin Slit2 Zeb2
GO:0022028	tangential migration from the subventric...	9	3	0.66	0.02394	0.02394	Robo1 Slit1 Slit2
GO:0034374	low-density lipoprotein particle remodel...	9	3	0.66	0.02394	0.02394	Apoa2 Apob Lipc
GO:0034384	high-density lipoprotein particle cleara...	9	3	0.66	0.02394	0.02394	Apoa2 Apoc2 Apom
GO:0048251	elastic fiber assembly	9	3	0.66	0.02394	0.02394	Atp7a Lox Thsd4
GO:1903054	negative regulation of extracellular mat...	9	3	0.66	0.02394	0.02394	Adtrp Chadl Dpp4
GO:1903589	positive regulation of blood vessel endo...	9	3	0.66	0.02394	0.02394	Apela Jcad Ppp1r16b
GO:0050821	protein stabilization	169	20	12.45	0.02415	0.02415	A1cf Ank2 Apbb2 Apoa1 Apoa2 Atp1b1 Bag3 Cct8 Cryab Dnlz Gapdh Ifi30 Irgm2 Lamp2 Mcm8 Pink1 Taf1 Tcp1 Usp33 Zbed3
GO:0007265	Ras protein signal transduction	414	46	30.5	0.00352	0.0248	Apoa1 Arfgap1 Arhgap24 Arhgap32 Arhgef10l Arhgef28 Camk2d Col1a2 Cyth4 Dab2ip Dgkz Dok1 Eps8 Eps8l3 F2rl1 Git1 Gpr55 Gpsm2 Grb2 Ift22 Iqsec2 Itsn1 Kpnb1 Ksr1 Mapre2 Mcf2l Mras Net1 Phactr4 Plce1 Plekhg5 Plekhg6 Prag1 Psd3 Rab17 Rab27b Rab31 Rab40c Ralgps2 Rhobtb2 Robo1 Rsu1 Sdcbp Shtn1 Synj2bp Tnfaip1
GO:0031532	actin cytoskeleton reorganization	101	13	7.44	0.03424	0.02512	Arpc2 Atp2c1 Bcar1 Capn10 Ccl27a Dtnbp1 Eps8 Ezr Mdk Phactr1 Rhobtb2 Sptan1 Thsd7a
GO:0032963	collagen metabolic process	109	14	8.03	0.02922	0.02596	Col1a1 Col1a2 Ctsk F2 Fgfr3 Ihh Larp6 Mmp1a P3h2 Plod2 Rcn3 Serpinf2 Smpd3 Suco
GO:0051016	barbed-end actin filament capping	21	5	1.55	0.01623	0.02608	Add3 Arpc2 Eps8 Evl Vil1
GO:0046835	carbohydrate phosphorylation	16	4	1.18	0.02611	0.02611	Galk1 Gnptab Itpk1 Rbks
GO:0071514	genetic imprinting	37	5	2.73	0.13329	0.02614	Axin1 Cdkn1c Gnas Meg3 Xist
GO:0008203	cholesterol metabolic process	126	14	9.28	0.0804	0.02662	Apoa1 Apoa2 Apoa4 Apob Apoc1 Cubn Gba2 Lipc Lipe Lmf1 Mbtps1 Pcsk9 Soat2 Sorl1
GO:0032869	cellular response to insulin stimulus	193	24	14.22	0.00819	0.02738	Agt Ahsg Bcar1 Capn10 Grb2 Hnrnpk Lpin2 Nr1h4 Opa1 Parp1 Pck1 Pcsk9 Pde3b Pid1 Ptpn2 Ptprf Rab31 Rarres2 Sesn3 Smarcc1 Sorl1 Src Ybx1 Zfp36l1
GO:0002486	antigen processing and presentation of e...	32	6	2.36	0.0274	0.0274	Gm7030 H2-Q1 H2-Q10 H2-Q7 H2-T22 H2-T23
GO:0035025	positive regulation of Rho protein signa...	32	6	2.36	0.0274	0.0274	Apoa1 F2rl1 Gpr55 Mcf2l Prag1 Robo1
GO:0016042	lipid catabolic process	306	41	22.54	0.00015	0.02775	Aadac Acaa1a Acap1 Acat3 Acox1 Acox2 Acox3 Adtrp Apoa1 Apoa2 Apoa4 Apob Apoc2 Apoh Cpt1a Ddhd1 Enpp7 Gba2 Hcar2 Hint2 Hsd11b1 Lipc Lipe Lpin2 Pafah1b1 Pafah1b3 Pck1 Pde3b Pik3cg Pla2g12b Pla2g6 Plb1 Plce1 Pld1 Pnpla6 Rarres2 Slc27a2 Smpd3 Sorl1 Srd5a1 Ugt1a7c
GO:0045453	bone resorption	74	9	5.45	0.09313	0.02822	Ahsg Ctsk Gpr55 Ihh Itgav Ltbp3 Src Tpp1 Trf
GO:0071364	cellular response to epidermal growth fa...	41	7	3.02	0.02871	0.02871	Arpc2 Dab2 Dab2ip Dusp22 Git1 Vil1 Zfp36l1
GO:0001649	osteoblast differentiation	199	18	14.66	0.21492	0.02876	Cebpd Cited1 Clic1 Col1a1 Dhh Fgf2 Fgf9 Gnas Grem1 Hira Ihh Lgr4 Lox Nbr1 Runx2 Scube2 Suco Trp53inp2
GO:0023052	signaling	6647	503	489.72	0.23822	0.02891	Abat Abi1 Abraxas1 Acap1 Ackr4 Acvrl1 Adam17 Adamts12 Adarb1 Adcy2 Adcy3 Adgrl3 Adm2 Adnp Adtrp Afdn Afp Agt Ahsg Ajuba Aldh1a3 Amer2 Anapc2 Ank2 Ankrd2 Ano1 Anxa2 Anxa3 Apela Apoa1 Apoa2 Arfgap1 Arhgap11a Arhgap18 Arhgap24 Arhgap30 Arhgap32 Arhgap6 Arhgap8 Arhgef10l Arhgef28 Arpc2 Arrdc3 Ash1l Aspm Atp1b1 Atp7a Axin1 Bad Bag3 Bcar1 Bcl2l2 Bfar Bicd1 Birc5 Bnip2 C1qtnf1 Cacna1d Cacnb1 Calca Camk2…
GO:1901991	negative regulation of mitotic cell cycl...	141	23	10.39	0.00026	0.02909	Anapc15 Birc5 Cdk2ap2 Cdkn1a Dgkz Donson Ezh2 Fbxo31 Fhl1 Hus1 Jade1 Lcmt1 Mdm2 Nacc2 Pidd1 Plk3 Rint1 Taok3 Tpr Tpra1 Zfp36l1 Zfp655 Zfp830
GO:0048146	positive regulation of fibroblast prolif...	69	10	5.08	0.02912	0.02912	Agt Anxa2 Cd74 Cdkn1a Ctc1 Esr1 Fn1 Gas6 Kmt2c Sphk1
GO:2001242	regulation of intrinsic apoptotic signal...	169	21	12.45	0.01287	0.02922	Ankrd2 Bad Bcl2l2 Cd44 Cd74 Cep63 Cyld Dapk2 Hnrnpk Hsph1 Mdm2 Nacc2 Ndufs3 Opa1 Parp1 Pink1 Ptpn2 Selenos Sept4 Src Zfp385a
GO:0043647	inositol phosphate metabolic process	65	13	4.79	0.00079	0.02923	Cd244a Fgf2 Impa2 Inpp1 Inpp4b Inpp5a Ip6k2 Itpk1 Nudt10 Nudt11 Ocrl Plce1 Synj2
GO:0045005	DNA-dependent DNA replication maintenanc...	38	10	2.8	0.00032	0.02926	Donson Fancm Mcm9 Mms22l Pold1 Rtel1 Samhd1 Timeless Tipin Zfp830
GO:1900746	regulation of vascular endothelial growt...	17	7	1.25	0.00012	0.02931	Ccbe1 Cd63 Dab2ip Dcn Jcad Robo1 Tcf4
GO:0045911	positive regulation of DNA recombination	40	8	2.95	0.00785	0.02934	Ercc2 Mad2l2 Mlh1 Pagr1a Parp1 Prdm9 Stat6 Timeless
GO:0060192	negative regulation of lipase activity	16	6	1.18	0.00067	0.02934	Angptl4 Anxa8 Apoa1 Apoa2 Bicd1 Rgs2
GO:0090218	positive regulation of lipid kinase acti...	33	7	2.43	0.00909	0.02935	Dgkz F2 Fgf2 Fgfr3 Flt1 Pik3r4 Src
GO:0000076	DNA replication checkpoint	14	4	1.03	0.01616	0.0294	Hus1 Timeless Tipin Zfp830
GO:0090520	sphingolipid mediated signaling pathway	9	3	0.66	0.02394	0.02942	Ezr Smpd3 Sphk1
GO:0010958	regulation of amino acid import across p...	10	3	0.74	0.03236	0.02943	Agt Rgs2 Sept2
GO:1903431	positive regulation of cell maturation	11	3	0.81	0.04211	0.02943	Aurka Opa1 Runx1
GO:0043312	neutrophil degranulation	12	3	0.88	0.05315	0.02943	Anxa3 Itgam Vamp7
GO:0048846	axon extension involved in axon guidance	37	4	2.73	0.2891	0.02946	Sema4g Slit1 Slit2 Slit3
GO:0010952	positive regulation of peptidase activit...	162	10	11.94	0.7628	0.02956	Bad Casp9 Cyfip2 Dapk1 Gramd4 Mapk14 Pidd1 Rcn3 Robo1 Tank
GO:0010628	positive regulation of gene expression	2258	220	166.36	7.1e-06	0.02999	Acvrl1 Adam17 Adarb1 Adm2 Adtrp Afdn Agt Ank2 Apoa2 Apob Arhgef10l Arnt Ash1l Ash2l Atf1 Atf2 Axin1 Bag1 Bex2 Brd4 Bud23 C1qtnf1 Caprin2 Carf Ccbe1 Ccdc88b Ccnt2 Cd244a Cd44 Cd74 Cd83 Cebpd Cebpg Chchd10 Chd6 Chd7 Cited1 Clec4n Col1a1 Crtc1 Csrnp1 Ctnnd1 Cyp3a13 Dab2 Dab2ip Dcn Ddx58 Dhx34 Dimt1 Dnajc2 Dtnbp1 Dyrk1b E2f6 Eaf1 Efcab7 Egr1 Eif2ak2 Eif2s3y Elf4 Epc1 Ercc2 Esr1 Esrrb Ezr F2rl1 Fastkd…
GO:0043066	negative regulation of apoptotic process	922	86	67.93	0.01394	0.03019	Abraxas2 Adam17 Adnp Agt Alb Angptl4 Apbb2 Apoh Atp7a Aurka Bad Bag1 Bag3 Bcl2l2 Bfar Birc5 Cd44 Cd74 Cdkn1a Cdkn1b Cep63 Cflar Chst11 Ciapin1 Cib1 Cited1 Col2a1 Cryab Dab2 Dapk1 Dffa Eif2ak2 Eya3 Fga Fgb Fgg Fn1 Gapdh Gas6 Glp1r Grem1 Hnrnpk Hpn Hsph1 Htr2b Ihh Il2rb Itgav Itsn1 Mdk Mdm2 Mitf Mnat1 Mnt Myo18a Naip2 Nckap1l Ndnf Ndufaf4 Ndufs3 Nr1h4 Nuak2 Opa1 Pa2g4 Pax2 Pidd1 Pik3cg Pink1 Plk3 P…
GO:0006935	chemotaxis	597	63	43.98	0.00255	0.03024	Ackr4 Adam17 Apbb2 Apoa1 Bcar1 Ccdc141 Ccl27a Ccl28 Cd74 Cdk5r1 Celsr3 Coro1b Cxcl14 Cxcr4 Cxcr6 Cyfip2 Dapk2 Dpysl4 Ear2 Epha3 Epha7 Ephb4 Ephb6 Evl F2rl1 Fcgr3 Fgf2 Flt1 Fn1 Gas6 Grem1 Igfals Itgam Itgav L1cam Lect2 Lgr4 Lox Lrp2 Lyst Mapk14 Mdk Mtus1 Mycbp2 Nckap1l Nfib Ntn3 Pik3cd Pik3cg Pla2g6 Plekhg5 Plgrkt Prtg Ptpn2 Ptprj Rarres2 Robo1 Sema4g Slc37a4 Slit1 Slit2 Slit3 Usp33
GO:0006468	protein phosphorylation	1817	185	133.87	3e-06	0.03026	Abi1 Acvrl1 Adam17 Adarb1 Adm2 Adnp Adtrp Agt Ajuba Anxa2 Apoa1 Ash1l Aurka Axin1 Bag1 Birc5 Bmp2k Bnip2 Brd4 C1qtnf1 Camk2d Caprin2 Ccnb2 Ccnj Cd109 Cd300a Cd44 Cd74 Cdc25b Cdc7 Cdk14 Cdk18 Cdk5r1 Cdk8 Cdkl3 Cdkl5 Cdkn1a Cdkn1b Celsr3 Cflar Cib1 Clec1b Cryab Csnk1a1 Ctnnd1 Cxcr4 Cyld Cysltr2 Dab2 Dab2ip Dapk1 Dapk2 Dazap2 Dclk1 Dixdc1 Dmpk Dok1 Dok7 Dtnbp1 Dusp22 Dyrk1b Egr1 Eif2ak2 Epha3 Epha7 …
GO:0040008	regulation of growth	717	85	52.83	9e-06	0.03075	Acvrl1 Adam17 Adnp Afdn Agt Ahsg Anapc2 Apbb2 Atp8a2 Caprin2 Ccnb2 Cd44 Cda Cdhr2 Cdk5r1 Cdkl3 Cdkl5 Cdkn1a Cdkn1b Celf1 Chd7 Cib1 Clasp2 Clstn3 Cryab Cspg5 Cxcr4 Dab2 Dab2ip Dnajc2 Epb41l3 Epc1 Epha7 Ezr F2 Fgf2 Fgf9 Fgfr3 Fhl1 Fn1 Gas6 Gnas Gpc3 Grem1 Hnf4a Hnrnpk Hpn Ihh Ikzf1 Ip6k2 Jarid2 Kat5 Kazald1 Kctd11 L1cam Lpar3 Mad2l2 Mapk11 Mapk14 Morf4l1 Mtm1 Ndufs3 Pafah1b1 Parp1 Pls1 Ptk6 Ptprj R…
GO:0019725	cellular homeostasis	933	95	68.74	0.00081	0.03114	Abcc2 Ackr4 Agt Ank2 Ano1 Apex1 Atp1b1 Atp2c1 Atp6v0a4 Atp6v0d2 Atp6v1a Atp7a Atp7b Bad Bag3 Birc5 C1qtnf1 Cacna1d Calca Camk2d Ccl28 Cfl2 Chd7 Cherp Cp Cubn Cxcr4 Cxcr6 Dctn1 Dmpk Ero1l Esr1 F2 F2rl1 Fgf2 Foxa3 Gaa Gas6 Glp1r Gnb1 Gpr39 Gpr55 Grin2d Gtf2i Hkdc1 Hpx Htr2b Inpp4b Itgav Itpr1 Kng1 Kng2 Lamp2 Lin28a Lox Lpar3 Lrp2 Map1a Micu1 Mt2 Mtln Mtm1 Ncoa4 Ndufaf2 Nr1h4 P2ry2 Pax2 Pck1 Pde1c P…
GO:0002009	morphogenesis of an epithelium	553	59	40.74	0.00268	0.03125	Acvrl1 Adamts12 Agt Ajuba Aldh1a3 Arhgap24 Atp7a Camsap3 Cd151 Cd44 Celsr3 Cited1 Clasp1 Clasp2 Ctnnd1 Cxcr4 Dab2 Epha7 Esr1 Esrp2 Fem1b Fgf2 Fgfr3 Flt1 Fras1 Fzd5 Gatad2a Gpc3 Grb2 Grem1 Ihh Kdm6a Krt6a Lgr4 Lrp2 Luzp1 Mdk Mthfr Opa1 Pafah1b1 Pax2 Pbx1 Phactr4 Plekha4 Robo1 Rreb1 Runx1 Sdc4 Sh3bp1 Slit2 Src Sulf1 Tbx4 Tgfb1i1 Timeless Tnc Vdr Zeb2 Zfp568
GO:0007156	homophilic cell adhesion via plasma memb...	110	14	8.1	0.0313	0.0313	Anxa3 Ccdc141 Cdhr2 Celsr3 Clstn3 Dsc2 Hmcn1 Igsf9 Kirrel3 L1cam Prtg Ptprf Robo1 Sdk2
GO:0030282	bone mineralization	116	14	8.55	0.04607	0.03132	Ahsg Bmp2k Col1a2 Ecm1 Ercc2 Fgfr3 Gpc3 Grem1 Lgr4 Lox Ltbp3 Nbr1 Smpd3 Suv39h1
GO:0002476	antigen processing and presentation of e...	33	6	2.43	0.03147	0.03147	Gm7030 H2-Q1 H2-Q10 H2-Q7 H2-T22 H2-T23
GO:0070371	ERK1 and ERK2 cascade	323	37	23.8	0.00507	0.03157	Adam17 Agt Camk2d Cd44 Cd74 Cflar Cib1 Cysltr2 Dab2 Dab2ip Epha7 Esr1 Ezr F2rl1 Fga Fgb Fgf2 Fgfr3 Fgfr4 Fgg Flt1 Fn1 Gas6 Gpr55 Htr2b Il1a Itgav L1cam Ptpn2 Serpinf2 Src Synj2bp Thpo Tnip1 Trf Wnk2 Zfp36l1
GO:0022617	extracellular matrix disassembly	32	9	2.36	0.00037	0.03197	Clasp1 Clasp2 Dpp4 Exoc8 Fgfr4 Hpn Kif9 Meltf Plg
GO:0010954	positive regulation of protein processin...	23	7	1.69	0.001	0.03205	Ccbe1 Ctnnd1 Hpn Meltf Plgrkt Spon1 Src
GO:0046470	phosphatidylcholine metabolic process	37	8	2.73	0.0048	0.03205	Apoa1 Apoa2 Apoa4 Capn2 Fabp3 Lipc Pla2g3 Pnpla6
GO:0033260	nuclear DNA replication	37	7	2.73	0.01696	0.03211	Cdc7 Dbf4 Donson Mcm5 Rtel1 Upf1 Zfp830
GO:0042770	signal transduction in response to DNA d...	90	13	6.63	0.01446	0.03216	Abraxas1 Casp9 Cd44 Cd74 Cdkn1a Grb2 Kat5 Mad2l2 Mapk14 Mdm2 Pidd1 Rint1 Zfp385a
GO:0034383	low-density lipoprotein particle clearan...	23	8	1.69	0.00015	0.03216	Anxa2 Apob Ehd1 Hnrnpk Lipc Mylip Nr1h4 Pcsk9
GO:0036120	cellular response to platelet-derived gr...	17	4	1.25	0.03221	0.03221	Arpc2 Atp7a Coro1b Src
GO:1905331	negative regulation of morphogenesis of ...	17	4	1.25	0.03221	0.03221	Cited1 Clasp1 Clasp2 Sulf1
GO:0043903	regulation of interspecies interactions ...	198	19	14.59	0.14317	0.03225	Adarb1 Anxa2 Bad Cd74 Cxcr4 Eif2ak2 F2rl1 Gapdh Hpn Igf2r Itgav Kpna2 Larp1 Morc2a Oas1b Shfl Tmprss2 Trim27 Zfp809
GO:0006000	fructose metabolic process	10	3	0.74	0.03236	0.03236	Aldob Fbp2 Pfkfb4
GO:0032375	negative regulation of cholesterol trans...	10	3	0.74	0.03236	0.03236	Apoa2 Apoc2 Pcsk9
GO:0033299	secretion of lysosomal enzymes	10	3	0.74	0.03236	0.03236	Gnptab Lyst Nr1h3
GO:0051775	response to redox state	10	3	0.74	0.03236	0.03236	Selenos Smpd3 Vasn
GO:0060052	neurofilament cytoskeleton organization	10	3	0.74	0.03236	0.03236	Arhgef28 Atp8a2 Nefh
GO:0061684	chaperone-mediated autophagy	10	3	0.74	0.03236	0.03236	Bag3 Lamp2 Plk3
GO:0090091	positive regulation of extracellular mat...	10	3	0.74	0.03236	0.03236	Clasp1 Clasp2 Meltf
GO:0090129	positive regulation of synapse maturatio...	10	3	0.74	0.03236	0.03236	Anapc2 Dab2ip Hnrnpk
GO:0048260	positive regulation of receptor-mediated...	57	11	4.2	0.00265	0.03296	Anxa2 Bicd1 Cd63 Dab2 Dtnbp1 Grem1 Hnrnpk Pcsk9 Synj2bp Trf Vtn
GO:0010575	positive regulation of vascular endothel...	25	5	1.84	0.03322	0.03322	Arnt Ccbe1 Hpse Il1a Sulf1
GO:0007420	brain development	634	62	46.71	0.01376	0.03432	Adgrl3 Afdn Aldh1a3 Aspm Atp7a B4galt2 Btbd3 Ccdc141 Cdk5r1 Chd7 Cited1 Cxcr4 Dab2ip Dclk1 Dixdc1 Epha7 Ezh2 Fgf2 Fgfr3 Foxj1 Hnrnpk Hsd3b1 Hspg2 Ikzf1 Kirrel3 Lhx6 Lrp2 Lrp8 Macrod2 Mboat7 Mdk Mettl14 Mnat1 Nefh Nfib Nfix Nin Nnat Pafah1b1 Pafah1b3 Pax2 Phactr1 Pitx1 Rbfox2 Robo1 Sept4 Sez6l Slc6a4 Slit1 Slit2 Smarca1 Sox3 Sphk1 Src Sun2 Synj2 Taf1 Trnp1 Tsku Utp3 Wls Zeb2
GO:0046777	protein autophosphorylation	240	26	17.68	0.0312	0.03446	Brd4 Camk2d Cdkl5 Ctnnd1 Dapk1 Dyrk1b Eif2ak2 Epha7 Ephb4 Fgfr3 Fgfr4 Flt1 Gfra2 Grem1 Mapk14 Mvp Myo3b Nek6 Pink1 Ptk6 Smg1 Src Stk16 Taf1 Taok3 Wnk2
GO:0007565	female pregnancy	160	17	11.79	0.08137	0.03523	A1cf A2m Abcg2 Ash1l Esr1 Fkbp4 H2-Q7 Klf9 Maged2 Prl2b1 Prl2c5 Prl7a2 Prl7c1 Prl8a8 Prl8a9 Pzp Vdr
GO:0001501	skeletal system development	530	55	39.05	0.00643	0.03563	Abi1 Adamts12 Ankrd11 Anxa2 Ash1l Atp7a Axin1 Bbx Cdkn1c Chadl Chd7 Chst11 Col11a1 Col1a1 Col1a2 Col2a1 Col6a1 Col6a2 Csrnp1 Ctc1 Ctsk Ecm1 Etl4 Fgf2 Fgf9 Fgfr3 Gnas Grem1 Hoxa10 Hspg2 Ihh Lncpint Lox Ltbp3 Mapk14 Mdk Nfib Pafah1b1 Pbx1 Pip4k2a Pitx1 Runx1 Runx2 Scube2 Sh2b3 Smpd3 Src Sulf1 Tbx15 Tbx4 Thpo Trps1 Vcan Vdr Zfp385a
GO:0007519	skeletal muscle tissue development	197	15	14.51	0.48613	0.03573	Ankrd2 Ccnt2 Cfl2 Cflar Egr1 Hdac6 Lemd2 Lemd3 Maff Mapk14 Meg3 Mtm1 Mylpf Myorg Pitx1
GO:0061098	positive regulation of protein tyrosine ...	44	7	3.24	0.04048	0.03589	Adam17 Agt Dok7 Gas6 Grem1 Hsph1 Lrp8
GO:0032543	mitochondrial translation	75	11	5.53	0.02102	0.0361	Chchd1 Ears2 Fastkd3 Gatb Lars2 Mrpl16 Mrpl2 Mrps17 Mrps25 Rpusd4 Trub2
GO:0003007	heart morphogenesis	280	22	20.63	0.40865	0.03651	Acvrl1 Adamts1 Atf2 Chd7 Col11a1 Col2a1 Ephb4 Fgf9 Gaa Htr2b Ihh Kdm6a Lemd2 Lrp2 Mdm2 Mybpc3 Pbrm1 Robo1 Slit2 Slit3 Uty Zfpm2
GO:0000724	double-strand break repair via homologou...	127	19	9.36	0.0024	0.03709	Ccdc155 Cdc7 Fignl2 Hus1 Mad2l2 Mcm5 Mcm8 Mcm9 Mms22l Morf4l1 Nsmce2 Parp1 Rad51ap1 Rnf138rt1 Rtel1 Samhd1 Timeless Ube2n Usp51
GO:0046849	bone remodeling	102	18	7.51	0.00044	0.0385	Ahsg Ctsk Fgfr3 Gpr55 Grem1 Ihh Inpp4b Itgav Lgr4 Ltbp3 Mdk Mitf Spp2 Src Suco Tph1 Tpp1 Trf
GO:1900006	positive regulation of dendrite developm...	108	18	7.96	0.00089	0.03853	Afdn Anapc2 Caprin2 Cdkl3 Cdkl5 Crtc1 Dab2ip Elavl4 Ezh2 Fbxo31 Hnrnpk Itsn1 Lrp8 Opa1 Pafah1b1 Ptprf Tbc1d24 Vamp7
GO:0001824	blastocyst development	149	14	10.98	0.20872	0.03872	9130008F23Rik Atp1b1 Bnip2 Brd4 Capn2 Cnot2 Esrrb Nasp Pbrm1 Prickle2 Psmc4 Suv39h1 Uspl1 Zfp830
GO:0051642	centrosome localization	32	9	2.36	0.00037	0.03877	Aspm Aurka Ccdc141 Ezr Gpsm2 Nin Pafah1b1 Spout1 Sun2
GO:0001961	positive regulation of cytokine-mediated...	45	8	3.32	0.0159	0.03892	Adam17 Cd74 Cxcr4 Gas6 Hpx Irgm2 Pafah1b1 Zbp1
GO:0030858	positive regulation of epithelial cell d...	62	8	4.57	0.08401	0.03901	Acvrl1 Bad Foxa3 Foxj1 Pax2 Proc Vdr Zeb2
GO:0046856	phosphatidylinositol dephosphorylation	24	5	1.77	0.02824	0.03902	Inpp4b Mtm1 Mtmr1 Ocrl Synj2
GO:0051289	protein homotetramerization	103	13	7.59	0.03928	0.03928	Aldh1a3 Cda Crtc1 Cryz Dcxr Evl Gapdh Gbp5 Gpx3 Itpr1 Pcbd1 Samhd1 Tdo2
GO:0071236	cellular response to antibiotic	199	22	14.66	0.0369	0.04009	Adcy2 Adcy3 Ankzf1 Apex1 Arpc2 Cdkn1b Egr1 Ezh2 Hdac6 Hnrnpk Hsph1 Larp1 Mdm2 Net1 Pax2 Pink1 Scn3a Smpd3 Sphk1 Src Stat6 Timeless
GO:0043406	positive regulation of MAP kinase activi...	220	21	16.21	0.13412	0.04037	Ajuba Axin1 Cd74 Dab2 Dab2ip Eif2ak2 Ezh2 Fgf2 Flt1 Fzd5 Gpr39 Htr2b Lpar3 Map3k10 Pik3cg Plce1 Robo1 Src Taok3 Trf Zeb2
GO:0048477	oogenesis	95	10	7	0.16108	0.04078	Aspm Aurka Ccdc155 Cdc25b Ihh Mdk Mlh1 Pabpc1l Src Zfp830
GO:0010466	negative regulation of peptidase activit...	242	40	17.83	1.2e-06	0.04169	A2m Agt Ahsg Anxa8 Birc5 Cd109 Cd44 Cflar Cryab Cst7 Ecm1 Gapdh Gas6 Gpc3 Itih2 Itih3 Itih4 Kng1 Kng2 Mdm2 Naip2 Pax2 Pzp Serpina10 Serpina1a Serpina1b Serpina1c Serpina1d Serpinb1a Serpinb6b Serpinb9 Serpind1 Serpinf1 Serpinf2 Sorl1 Spink1 Src Tfpi Vtn Xiap
GO:0035313	wound healing, spreading of epidermal ce...	17	6	1.25	0.00097	0.04195	Acvrl1 Ajuba Arhgap24 Clasp1 Clasp2 Rreb1
GO:0006865	amino acid transport	146	14	10.76	0.18831	0.04204	Abat Agt Dtnbp1 Kmo Lrrc8d Rgs2 Sept2 Sfxn5 Slc13a3 Slc17a5 Slc25a22 Slc3a1 Slc6a19 Slc7a9
GO:0050922	negative regulation of chemotaxis	54	7	3.98	0.10013	0.04206	Coro1b Grem1 Ptpn2 Robo1 Sema4g Slit1 Slit2
GO:0042448	progesterone metabolic process	16	4	1.18	0.02611	0.04207	Afp Cyp21a1 Egr1 Srd5a1
GO:0006977	DNA damage response, signal transduction...	11	3	0.81	0.04211	0.04211	Cdkn1a Mdm2 Pidd1
GO:0010870	positive regulation of receptor biosynth...	11	3	0.81	0.04211	0.04211	Hdac6 Hnrnpk Nr1h3
GO:0018206	peptidyl-methionine modification	11	3	0.81	0.04211	0.04211	Apoa1 Apoa2 Metap2
GO:0030953	astral microtubule organization	11	3	0.81	0.04211	0.04211	Clasp1 Ezr Kpnb1
GO:0043619	regulation of transcription from RNA pol...	11	3	0.81	0.04211	0.04211	Ankrd2 Arnt Chd6
GO:0070493	thrombin-activated receptor signaling pa...	11	3	0.81	0.04211	0.04211	F2 F2rl1 Iqgap2
GO:0090148	membrane fission	11	3	0.81	0.04211	0.04211	Mx1 Opa1 Tmcc1
GO:1902166	negative regulation of intrinsic apoptot...	11	3	0.81	0.04211	0.04211	Cd44 Cd74 Zfp385a
GO:1902514	regulation of calcium ion transmembrane ...	11	3	0.81	0.04211	0.04211	Cacna1d Cacnb1 Camk2d
GO:0007041	lysosomal transport	98	17	7.22	0.00077	0.04409	Ap4m1 Clec16a Gnptab Hgs Hook2 Igf2r Lamp2 Lyst Mtm1 Ncoa4 Pcsk9 Pink1 Sorl1 Vamp7 Vps11 Vps52 Vps53
GO:0000381	regulation of alternative mRNA splicing,...	64	9	4.72	0.04413	0.04413	Celf1 Mbnl2 Rbfox2 Rbm25 Rbm5 Rbmx Sart3 Srsf5 Wtap
GO:0010971	positive regulation of G2/M transition o...	27	5	1.99	0.04473	0.04473	Brd4 Camk2d Cdc25b Cdc7 Pbx1
GO:0061003	positive regulation of dendritic spine m...	27	5	1.99	0.04473	0.04473	Afdn Caprin2 Lrp8 Opa1 Pafah1b1
GO:0048858	cell projection morphogenesis	696	85	51.28	2.8e-06	0.04504	Abi1 Adarb1 Adnp Afdn Anapc2 Apbb2 Arhgef28 Atl1 Atp7a Atp8a2 Aurka Btbd3 Caprin2 Ccdc141 Cd44 Cdk5r1 Cdkl3 Cdkl5 Celsr3 Clasp2 Coro1b Cspg5 Cxcr4 Cyfip2 Dab2ip Dclk1 Dixdc1 Dpysl4 Dtnbp1 Elavl4 Epb41l3 Epha3 Epha7 Ephb4 Ephb6 Evl Fbxo31 Fgfr3 Fn1 Gas7 Hdac6 Hnrnpk Igfals Jade2 Kirrel3 L1cam Lgr4 Lpar3 Lrp2 Lrp4 Lrp8 Map1a Mdk Mef2a Mycbp2 Nckap1l Nefh Nek3 Nfib Nin Ntn3 Opa1 Pafah1b1 Phactr1 Prt…
GO:0030866	cortical actin cytoskeleton organization	42	9	3.09	0.00302	0.04568	Epb41l2 Epb41l3 Ezr Kif23 Nckap1l Pdcd6ip Pls1 Racgap1 Vil1
GO:0006520	cellular amino acid metabolic process	249	37	18.35	3.5e-05	0.04583	Aass Abat Acy1 Adssl1 Ass1 Atp7a Bckdhb Ctps Ctps2 Ddah1 Ears2 Enoph1 Ero1l Farsa Gatb Ggt1 Ggt5 Glud1 Hars2 Hnf4a Hoga1 Iars Kmo Lars2 Mthfr Nr1h4 Otc Padi4 Pcbd1 Plod2 Prodh2 Psat1 Sirt4 Spr Tdh Tdo2 Tph1
GO:0043068	positive regulation of programmed cell d...	637	57	46.93	0.07349	0.04626	Adam17 Agt Aldh1a3 Apbb2 Atf2 Bad Bag1 C6 Camk2d Capn10 Capn2 Casp9 Cd44 Cdk5r1 Cdkn1a Chchd10 Cyld Dab2ip Dapk1 Dffa Egr1 Eif2ak2 Epha7 Fgfr3 Gapdh Gramd4 Grik5 Hcar2 Hdac6 Igf2r Ip6k2 Irf5 Itpr1 Ltbr Map3k10 Nacc2 Net1 Pcsk9 Pidd1 Pik3cd Pink1 Pla2g6 Ppp2r1b Ptpn2 Ptprf Rbm5 Robo1 Sept4 Slit2 Spdef Src Srpx Stpg1 Tfpt Trps1 Utp11 Vdr
GO:0009617	response to bacterium	907	59	66.82	0.86052	0.04626	Adam17 Anxa3 B3galt5 Ccdc80 Cd68 Cflar Chd7 Cited1 Cmpk2 Cubn Dab2ip Eif2ak2 F2 F2rl1 Fga Fgb Fzd5 Gbp5 Ggt1 Gpc3 H2-T23 Hmcn1 Ighd Il22ra1 Irf5 Irgm2 Itgav Krt6a Ly6a Lypd8 Lyst Macrod2 Mapk14 Mlh1 Mt2 Muc5b Myd88 Naip2 Nfib Nr1h3 Nr1h4 Palm3 Pck1 Pde2a Pgc Pla2g6 Pld1 Plscr3 Rarres2 Selenos Serpinb9 Slc17a5 Slfn4 Snhg1 Tent5a Tmem255a Trf Upf1 Vil1
GO:0042158	lipoprotein biosynthetic process	95	15	7	0.00393	0.04638	Abhd17a Apoa1 Apob Dpm1 Irgm2 Pigb Pigo Pigq Pigt Pigw Pigx Wdr45 Zdhhc16 Zdhhc24 Zdhhc6
GO:0070206	protein trimerization	62	11	4.57	0.00521	0.04645	C1qtnf1 Cd74 Col1a1 Col1a2 Col6a1 Col6a2 Cubn Dut Gnb1 Otc Trim27
GO:0002702	positive regulation of production of mol...	100	13	7.37	0.0319	0.04649	Cd244a Cd74 Ddx58 F2rl1 Fzd5 H2-T23 Hpx Mad2l2 Mapk14 Mlh1 Pagr1a Pgc Stat6
GO:0051653	spindle localization	48	8	3.54	0.02293	0.04655	Aspm Ccdc155 Clasp1 Dctn1 Dync1h1 Gpsm2 Kpnb1 Pafah1b1
GO:0010569	regulation of double-strand break repair...	44	7	3.24	0.04048	0.04658	Fignl2 Mad2l2 Parp1 Rad51ap1 Rtel1 Timeless Usp51
GO:0010715	regulation of extracellular matrix disas...	15	5	1.11	0.00347	0.04658	Clasp1 Clasp2 Dpp4 Fgfr4 Meltf
GO:0007007	inner mitochondrial membrane organizatio...	29	6	2.14	0.01733	0.04658	Chchd10 Dnajc11 Opa1 Pink1 Timm22 Tmem11
GO:0061028	establishment of endothelial barrier	45	7	3.32	0.04501	0.04659	Afdn Ezr F2rl1 Myd88 Pde2a Ppp1r16b Proc
GO:1903055	positive regulation of extracellular mat...	22	5	1.62	0.01976	0.04661	Agt Cflar Clasp1 Clasp2 Meltf
GO:0090043	regulation of tubulin deacetylation	11	4	0.81	0.00636	0.04662	Bex4 Fry Nek3 Tada3
GO:0003413	chondrocyte differentiation involved in ...	29	5	2.14	0.05835	0.04664	Col6a1 Col6a2 Ihh Scube2 Smpd3
GO:0060669	embryonic placenta morphogenesis	32	5	2.36	0.08272	0.04665	Cdkn1c Fzd5 Grb2 Zfp36l1 Zfp568
GO:0030201	heparan sulfate proteoglycan metabolic p...	35	5	2.58	0.11165	0.04666	Hpse Hs3st1 Hs6st1 Lipc Sulf1
GO:0097066	response to thyroid hormone	14	3	1.03	0.07886	0.04668	Cfb Hpn Klf9
GO:0030502	negative regulation of bone mineralizati...	19	4	1.4	0.04668	0.04668	Ahsg Ecm1 Grem1 Ltbp3
GO:0034063	stress granule assembly	19	4	1.4	0.04668	0.04668	Bicd1 Dync1h1 Ogfod1 Pum2
GO:0050860	negative regulation of T cell receptor s...	19	4	1.4	0.04668	0.04668	Dusp22 Ezr Ptpn2 Ptprj
GO:0060442	branching involved in prostate gland mor...	15	3	1.11	0.09338	0.04668	Cd44 Esr1 Fem1b
GO:0001788	antibody-dependent cellular cytotoxicity	5	2	0.37	0.0467	0.0467	Fcgr3 H2-T23
GO:0002175	protein localization to paranode region ...	5	2	0.37	0.0467	0.0467	Epb41l3 Ugt8a
GO:0002740	negative regulation of cytokine secretio...	5	2	0.37	0.0467	0.0467	Apoa1 Apoa2
GO:0002906	negative regulation of mature B cell apo...	5	2	0.37	0.0467	0.0467	Cd44 Cd74
GO:0006751	glutathione catabolic process	5	2	0.37	0.0467	0.0467	Ggt1 Ggt5
GO:0009177	pyrimidine deoxyribonucleoside monophosp...	5	2	0.37	0.0467	0.0467	Dctd Dut
GO:0009211	pyrimidine deoxyribonucleoside triphosph...	5	2	0.37	0.0467	0.0467	Cmpk2 Dut
GO:0009407	toxin catabolic process	5	2	0.37	0.0467	0.0467	Acaa1a Pon3
GO:0010897	negative regulation of triglyceride cata...	5	2	0.37	0.0467	0.0467	Pik3cg Sorl1
GO:0014005	microglia development	5	2	0.37	0.0467	0.0467	Itgam Tspan2
GO:0014063	negative regulation of serotonin secreti...	5	2	0.37	0.0467	0.0467	Cd300a Maob
GO:0015889	cobalamin transport	5	2	0.37	0.0467	0.0467	Amn Cubn
GO:0015961	diadenosine polyphosphate catabolic proc...	5	2	0.37	0.0467	0.0467	Nudt10 Nudt11
GO:0030382	sperm mitochondrion organization	5	2	0.37	0.0467	0.0467	Ddhd1 Sept4
GO:0032687	negative regulation of interferon-alpha ...	5	2	0.37	0.0467	0.0467	Gbp4 Nmi
GO:0033088	negative regulation of immature T cell p...	5	2	0.37	0.0467	0.0467	Ihh Tmem131l
GO:0035771	interleukin-4-mediated signaling pathway	5	2	0.37	0.0467	0.0467	Ptpn2 Stat6
GO:0035898	parathyroid hormone secretion	5	2	0.37	0.0467	0.0467	Fgfr4 Gnas
GO:0038145	macrophage colony-stimulating factor sig...	5	2	0.37	0.0467	0.0467	Dok1 Ptpn2
GO:0043308	eosinophil degranulation	5	2	0.37	0.0467	0.0467	F2rl1 Vamp7
GO:0045354	regulation of interferon-alpha biosynthe...	5	2	0.37	0.0467	0.0467	Nmi Tlr3
GO:0046078	dUMP metabolic process	5	2	0.37	0.0467	0.0467	Dctd Dut
GO:0048319	axial mesoderm morphogenesis	5	2	0.37	0.0467	0.0467	Axin1 Tcf7l1
GO:0051081	nuclear envelope disassembly	5	2	0.37	0.0467	0.0467	Dctn1 Pafah1b1
GO:0051256	mitotic spindle midzone assembly	5	2	0.37	0.0467	0.0467	Kif23 Racgap1
GO:0051387	negative regulation of neurotrophin TRK ...	5	2	0.37	0.0467	0.0467	Agt Ptprf
GO:0061026	cardiac muscle tissue regeneration	5	2	0.37	0.0467	0.0467	Cdkn1a Cdkn1b
GO:0061476	response to anticoagulant	5	2	0.37	0.0467	0.0467	Egr1 Slit2
GO:0070669	response to interleukin-2	5	2	0.37	0.0467	0.0467	Cited1 Ptpn2
GO:0070837	dehydroascorbic acid transport	5	2	0.37	0.0467	0.0467	Slc2a2 Slc2a3
GO:0070940	dephosphorylation of RNA polymerase II C...	5	2	0.37	0.0467	0.0467	Rprd1a Rprd1b
GO:0072300	positive regulation of metanephric glome...	5	2	0.37	0.0467	0.0467	Egr1 Pax2
GO:0090118	receptor-mediated endocytosis involved i...	5	2	0.37	0.0467	0.0467	Anxa2 Pcsk9
GO:0090272	negative regulation of fibroblast growth...	5	2	0.37	0.0467	0.0467	Cd59a Fgfr4
GO:1900004	negative regulation of serine-type endop...	5	2	0.37	0.0467	0.0467	Anxa8 Spink1
GO:1900736	regulation of phospholipase C-activating...	5	2	0.37	0.0467	0.0467	Bicd1 F2
GO:1902308	regulation of peptidyl-serine dephosphor...	5	2	0.37	0.0467	0.0467	Ppp1r15a Ppp1r16b
GO:1902744	negative regulation of lamellipodium org...	5	2	0.37	0.0467	0.0467	Coro1b Slit2
GO:1902817	negative regulation of protein localizat...	5	2	0.37	0.0467	0.0467	Abhd17a Map1a
GO:1904261	positive regulation of basement membrane...	5	2	0.37	0.0467	0.0467	Clasp1 Clasp2
GO:1904447	folate import across plasma membrane	5	2	0.37	0.0467	0.0467	Lrp2 Slc19a1
GO:1904970	brush border assembly	5	2	0.37	0.0467	0.0467	Anks4b Cdhr2
GO:1905077	negative regulation of interleukin-17 se...	5	2	0.37	0.0467	0.0467	Otud5 Parp1
GO:1905832	positive regulation of spindle assembly	5	2	0.37	0.0467	0.0467	Dync1h1 Gpsm2
GO:2000196	positive regulation of female gonad deve...	5	2	0.37	0.0467	0.0467	Runx1 Src
GO:2000304	positive regulation of ceramide biosynth...	5	2	0.37	0.0467	0.0467	Pla2g6 Smpd3
GO:2000523	regulation of T cell costimulation	5	2	0.37	0.0467	0.0467	Ephb4 Ephb6
GO:2001137	positive regulation of endocytic recycli...	5	2	0.37	0.0467	0.0467	Ehd1 Sorl1
GO:2001245	regulation of phosphatidylcholine biosyn...	5	2	0.37	0.0467	0.0467	Capn2 Fabp3
GO:0045773	positive regulation of axon extension	55	8	4.05	0.04719	0.04719	Adnp Anapc2 Cdkl5 Fn1 L1cam Pafah1b1 Rufy3 Shtn1
GO:0001932	regulation of protein phosphorylation	1410	139	103.88	0.00023	0.04755	Acvrl1 Adam17 Adarb1 Adnp Adtrp Agt Ajuba Anxa2 Apoa1 Ash1l Axin1 Bag1 Bnip2 C1qtnf1 Camk2d Caprin2 Ccnb2 Ccnj Cd109 Cd300a Cd44 Cd74 Cdc25b Cdk5r1 Cdkn1a Cdkn1b Celsr3 Cflar Cib1 Ctnnd1 Cxcr4 Cyld Cysltr2 Dab2 Dab2ip Dazap2 Dixdc1 Dok1 Dok7 Dtnbp1 Dusp22 Egr1 Eif2ak2 Epha7 Esr1 Ezh2 Ezr F2 F2rl1 Fga Fgb Fgf2 Fgf9 Fgfr3 Fgfr4 Fgg Flt1 Fn1 Fzd5 Gas6 Gbp4 Gfra2 Ggnbp2 Gnas Gpr39 Gpr55 Grb2 Grem1 Hd…
GO:0045597	positive regulation of cell differentiat...	1097	113	80.82	0.00017	0.04797	Acvrl1 Adam17 Adamts1 Adnp Afdn Agt Anapc2 Anxa2 Apoa1 Apob Arpc2 Aspm Atf1 Atp8a2 Aurka Bad Bag1 Bnip2 Capn2 Caprin2 Cd74 Cd83 Cdkl3 Cdkl5 Cebpd Cflar Cib1 Clic1 Col1a1 Crtc1 Cspg5 Cxcr4 Cyld Dab2 Dab2ip Dixdc1 Ehd1 Elavl4 Epc1 Epha3 Ezh2 Fbxo31 Fgf2 Fgfr3 Flt1 Fn1 Foxa3 Foxj1 Gas6 Glp1r Gnas Grem1 Hif1an Hnrnpk Ihh Ikzf1 Itpr1 Itsn1 Jade2 Kctd11 L1cam Lin28a Lpar3 Lrp2 Lrp8 Ltbp3 Mapk14 Mdk Med…
GO:0030198	extracellular matrix organization	271	46	19.97	8.8e-08	0.0482	Adtrp Agt Anxa2 Apbb2 Atp7a Ccdc80 Cflar Chadl Clasp1 Clasp2 Col11a1 Col16a1 Col1a1 Col1a2 Col2a1 Col4a6 Col8a2 Col9a2 Col9a3 Dpp4 Ercc2 Ero1l Exoc8 Fgfr4 Fn1 Grem1 Hpn Hspg2 Ihh Kazald1 Kif9 Lemd3 Lox Lum Meltf Mmp1a Mpv17 Ndnf Plg Plod2 Pxdn Serpinf2 Smpd3 Sulf1 Thsd4 Vtn

## Sheet: Supplementary_file_1f
GO.ID	Term	Annotated	Significant	Expected	classicFisher	weight01Fisher	Genes
GO:0045893	positive regulation of transcription, DN...	1533	210	127.67	1.7e-13	1.8e-09	Afap1l2 Ago1 Apobec1 App Arhgef10l Arhgef2 Arnt Arntl Atad2b Atmin Atxn7l3 Bcas3 Bclaf1 Bicra Bmpr1a Bmpr2 Brd8 Calcoco1 Ccnc Cd28 Cdk2 Cebpd Cela1 Cep290 Chd7 Cited2 Cops5 Creb5 Crem Crlf3 Ctbp2 Ctr9 Dab2 Daxx Dcn Dll1 Dnajc2 Dvl2 E2f2 E2f6 Eaf1 Eaf2 Eif2a Elf2 Elf3 Esr1 Eya1 Fgfr1 Flcn Fosl1 Fosl2 Foxa2 Foxj3 Foxl2 Fubp3 Fzd1 Gabpa Gabpb1 Gata1 Gata3 Ghrh Glis1 Gtf2a2 Gtf2f1 Gzf1 Hax1 Hey2 Hinf…
GO:0001701	in utero embryonic development	538	83	44.81	3.1e-08	8.6e-09	4933434E20Rik Adar Alkbh1 Amd1 Arnt Bmpr1a Cdk11b Cdkn1c Chd7 Chtop Cited2 Cmip Cnot1 Cnot3 Cpt2 Ctr9 Cul4a Dab2 Dbn1 Dll1 Ednra Elf3 Eno1 Epn2 Fgfr1 Flcn Flvcr1 Fosl1 Foxa2 Gabpa Gata1 Gata3 Gja1 Hba-a1 Hba-a2 Hc Hcn4 Hectd1 Hey2 Hinfp Icmt Inpp5k Kdm6a Kidins220 Krt19 Msh2 Mtss1 Myh10 Myo18b Ncoa3 Nfe2 Npat Nr2f2 Ocrl Ovol2 Pdgfrb Plcg1 Plk4 Psmc3 Pth1r Rrn3 Rrp7a Rtf1 Runx1 Rxra Sin3a Skil Sma…
GO:0045892	negative regulation of transcription, DN...	1180	173	98.27	8.3e-14	3.1e-07	A430033K04Rik Acvr2b Aebp1 Ajuba Apobec1 Arntl Atad2b Atn1 Atp8b1 Bag3 Bclaf1 Btg2 Ccar2 Ccdc85b Cdk2 Cdkn1b Cdkn1c Cebpd Cela1 Cic Cipc Cited2 Cnot1 Crem Crym Ctbp1 Ctbp2 Ctr9 Cxxc5 Dab2 Daxx Dcaf1 Dedd Dnajb5 Drap1 Dusp22 E2f2 E2f6 E4f1 Eed Ehmt2 Elf2 Elf3 Esr1 Ezr Fabp4 Fam172a Fgfr1 Fhl2 Flcn Foxl2 Foxs1 Fzd1 Gabpa Gata1 Gata3 Glis1 Gon4l Gzf1 H3f3a Hba-x Hbb-bh1 Hey2 Hinfp Hoxd9 Inpp5k Kdm5a…
GO:0000122	negative regulation of transcription by ...	857	114	71.37	3.6e-07	7.5e-07	Acvr2b Aebp1 Ajuba Atn1 Bag3 Btg2 Cdk2 Cdkn1c Cela1 Cic Cited2 Cnot1 Crem Crym Ctbp1 Ctr9 Cxxc5 Daxx Dcaf1 Dnajb5 Drap1 Dusp22 E2f2 E2f6 E4f1 Eed Ehmt2 Esr1 Ezr Fgfr1 Fhl2 Flcn Foxl2 Foxs1 Gabpa Gata1 Gata3 Glis1 Gzf1 Hba-x Hbb-bh1 Hey2 Hinfp Hoxd9 Kdm5a Klf11 Klf4 Ldb1 Lmcd1 Lpin1 Lrrfip1 Lyar Max Mbd1 Mecp2 Men1 Mitf Mmp12 Mta3 Myocd Nck2 Ncoa2 Nelfcd Noc2l Nr1d1 Nr1h3 Nr2c1 Nr2f1 Nr2f2 Nr4a3 N…
GO:0045944	positive regulation of transcription by ...	1223	152	101.86	3.1e-07	2.3e-06	Ago1 App Arhgef10l Arhgef2 Arnt Arntl Atad2b Bcas3 Bmpr1a Bmpr2 Brd8 Calcoco1 Ccnc Cd28 Cebpd Cela1 Chd7 Cited2 Cops5 Creb5 Crem Crlf3 Ctbp2 Ctr9 Dab2 Daxx Dcn Dll1 E2f2 E2f6 Eaf1 Eaf2 Eif2a Elf3 Esr1 Eya1 Fgfr1 Flcn Fosl1 Fosl2 Foxa2 Foxj3 Foxl2 Fubp3 Gabpa Gabpb1 Gata1 Gata3 Glis1 Gtf2a2 Gtf2f1 Gzf1 Hax1 Hey2 Hmga1 Hmgn3 Hoxa10 Hoxa9 Hoxb2 Hoxb5 Hoxd9 Hsph1 Ikbkg Inhba Itga6 Jak3 Jmjd6 Jup Kdm3…
GO:0008626	granzyme-mediated apoptotic signaling pa...	11	7	0.92	6.7e-06	6.7e-06	Bnip3 Gzmb Gzmc Gzmd Gzme Gzmf Gzmg
GO:0043066	negative regulation of apoptotic process	922	131	76.79	8.2e-10	1.5e-05	Abraxas2 Adam17 Adar Adnp Adora2a Ago4 Alkbh1 Apbb3 Armc10 Arrb2 Atad3a Atad5 Atg7 Aurka Axl Bad Bag3 Bcl2a1b Birc3 Bnip3 Btc Btg2 Card14 Ccar2 Cdk11b Cdkn1b Cfdp1 Cflar Cited2 Ckmt1 Clcf1 Cln3 Cops5 Csnk2a1 Dab2 Dapk1 Daxx Dffa Dll1 Ednra Eya1 Fhl2 Fnta Fyn Gata1 Gata3 Ghrh Ghrl Hax1 Hey2 Hsph1 Hypk Ido1 Ikbkg Ing2 Itga6 Itpkb Itsn1 Jak3 Klf4 Klhl20 Ltk Madd Maea Map2k4 Mapk7 Mapk8 Mecp2 Mitf Mn…
GO:0048821	erythrocyte development	40	15	3.33	3.3e-07	1.6e-05	Adgrf5 Cited2 Dmtn Flvcr1 Gata1 Hba-a1 Hba-a2 Hba-x Jmjd6 Lyar Maea Rhd Slc4a1 Tal1 Zbtb7a
GO:0070373	negative regulation of ERK1 and ERK2 cas...	75	18	6.25	3.3e-05	3.3e-05	Cnksr3 Dab2 Dusp6 Dynlt1b Ephb2 Errfi1 Ezr Fbln1 Flcn Klf4 Ptprc Ptprr Sema6a Sirpa Sirt3 Spry1 Timp3 Tlr4
GO:0051092	positive regulation of NF-kappaB transcr...	128	25	10.66	4.9e-05	4.9e-05	Ager Ankrd42 App Arhgef2 Card14 Cflar Flot2 Ikbkg Il18rap Lrrfip1 Lrrfip2 Malt1 Nod2 Prkch Rab7b Ripk4 Ror1 Rps6ka5 Sphk1 Stat3 Tlr4 Tnfrsf8 Trim13 Wnt5a Zbtb7a
GO:0019835	cytolysis	35	11	2.91	8.3e-05	5.2e-05	Cfh Fgl2 Gzmb Gzmc Gzmd Gzme Gzmf Gzmg Hc Pf4 Prf1
GO:0060065	uterus development	26	10	2.17	2.4e-05	0.00011	Cdkn1c Esr1 Foxl2 Gata3 Hoxa10 Hoxa9 Kdm5b Myocd Wnt5a Wnt7a
GO:0006260	DNA replication	242	34	20.15	0.00184	0.00015	Adra2a Atad5 Atg7 Cdk2 Cdt1 Chtf8 Dbf4 Dnajc2 Donson Dscc1 E4f1 Ehmt2 Fen1 Fgfr1 Gins2 Hus1 Lrwd1 Map2k4 Mapk8 Mre11a Nup98 Orc6 Pif1 Rbbp4 Recql4 Rrm2 Rtel1 Samhd1 Sin3a Ssrp1 Stag2 Thoc1 Top1 Top1mt
GO:1905564	positive regulation of vascular endothel...	16	7	1.33	0.00016	0.00016	Adam17 Akt3 Fgfr1 Ghrl Plcg1 Sirt6 Stat3
GO:0110104	mRNA alternative polyadenylation	5	4	0.42	0.00022	0.00022	Cpsf6 Cpsf7 Virma Ythdc1
GO:0016567	protein ubiquitination	568	89	47.3	4.6e-09	0.00024	Anapc1 Anapc10 Arrb2 Arrdc3 Atg7 Atxn7l3 Birc3 Cblb Ccnc Ccnf Cdc23 Cdc27 Cdc34b Cnot4 Ctr9 Cul1 Cul4a Cul5 Cul9 Daxx Dcaf1 Dcaf15 Dzip3 Fancl Fbxl3 Fbxo11 Fbxo9 Fem1b Fyn Gm28043 Hectd1 Hecw2 Hspbp1 Kcmf1 Klhl12 Klhl20 Klhl42 Klhl8 Mapk8 March3 Med24 Med7 Mylip Ndfip1 Nod2 Os9 Park7 Pcgf3 Pcnp Pdzrn3 Peli2 Phc1 Pja1 Plaa Rassf5 Rc3h2 Rffl Rlim Rnf135 Rnf139 Rnf165 Rnf181 Rnf19b Rnf20 Rnf217 Rnf6…
GO:0030511	positive regulation of transforming grow...	28	9	2.33	0.0003	0.0003	Adam17 Cited2 Dab2 Flcn Furin Ing2 Men1 Myocd Sdcbp
GO:0007052	mitotic spindle organization	105	20	8.74	0.00038	0.00031	Abraxas2 Aurka Cep126 Cep192 Drg1 Eml1 Map4 Mecp2 Msto1 Nup62 Parp3 Ptpa Ripor2 Stag1 Stag2 Stil Stmn1 Tacc1 Tbce Tpr
GO:0050885	neuromuscular process controlling balanc...	69	15	5.75	0.00046	0.00033	Abr Ap1s2 App Camk2b Cdh23 Cln3 Foxs1 Jph3 Myh10 Myo5a Nr4a3 Pafah1b1 Pde8b Rac3 Shank1
GO:0030335	positive regulation of cell migration	539	71	44.89	7.8e-05	0.00035	Abcc1 Adam17 Adra2a Ager Akt3 Aldoa App Arhgef2 Atp8a1 Bcas3 Bmpr2 Capn1 Col18a1 Cpeb1 Cxcl14 Dab2 Dmtn Ednra Elp1 F7 Fam110c Fbln1 Fgfr1 Furin Gata3 Gpsm3 Irs1 Itga6 Kif20b Lgr6 Map3k3 Mapk14 Mapk8 Mcam Myo1c Myo5a Nr4a3 Numb Oxsr1 Pak3 Pdgfc Pdgfrb Pgr Plaa Plcg1 Pld1 Ptger3 Ptgs2 Ptk2 Ptprc Rarres2 Ripor2 Rufy3 Sdcbp Sema3b Sema3g Sema5b Sema6a Sema6c Sphk1 Stat3 Swap70 Syne2 Synpo2 Thy1 Trem2…
GO:0043161	proteasome-mediated ubiquitin-dependent ...	394	62	32.81	8.5e-07	0.00036	Anapc1 Anapc10 Armc8 Arntl Arrb2 Atg7 Aup1 Aurka Ccar2 Ccnf Cd2ap Cdc34b Clec16a Cul1 Cul4a Cul5 Dab2 Dcaf11 Dnajb12 Fbxl18 Fbxl3 Fbxo9 Hecw2 Hspbp1 Klhl20 Klhl42 Maea Map1a Mapk8 Nccrp1 Nsfl1c Os9 Park7 Pcnp Plaa Plk3 Pmp22 Psma5 Psmb7 Psmb9 Psmd12 Rad23b Rffl Rnf121 Rnf19b Rnf217 Rpl11 Rybp Sdcbp Syvn1 Tbl1x Trim13 Trim3 Ube2a Ube2d3 Ube2h Ube2k Ubr2 Ubr3 Usp5 Usp7 Wac
GO:0051642	centrosome localization	32	10	2.67	0.00018	0.00038	Aurka Ccdc141 Ezr Nubp1 Pafah1b1 Pard3 Plxna2 Sema6a Syne1 Syne2
GO:0006511	ubiquitin-dependent protein catabolic pr...	580	93	48.3	6.1e-10	0.0004	Anapc1 Anapc10 Armc8 Arntl Arrb2 Atg7 Aup1 Aurka Cacul1 Ccar2 Ccnf Cd2ap Cdc34b Clec16a Cnot4 Csnk2a1 Cul1 Cul4a Cul5 Cul9 Dab2 Dcaf11 Dnajb12 Fbxl18 Fbxl3 Fbxo11 Fbxo9 Gm28043 Gm9774 Hecw2 Hspbp1 Klhl20 Klhl42 Klhl8 Maea Map1a Mapk8 Mylip Nccrp1 Ndfip1 Nsfl1c Os9 Park7 Pcnp Plaa Plk3 Pmp22 Psma5 Psmb7 Psmb9 Psmd12 Ptk2 Rad23b Rffl Rlim Rnf121 Rnf130 Rnf139 Rnf19b Rnf20 Rnf217 Rnf6 Rpl11 Rybp Sdc…
GO:0006338	chromatin remodeling	163	31	13.58	1.1e-05	0.0005	Actr5 Apobec1 Chd1 Chd3 Chd5 Chd7 Daxx Fam172a Gata3 H3f3a Kdm5a Kdm5b Kdm5d Kdm6a Mbd1 Men1 Morf4l1 Phf8 Pphln1 Rbbp4 Resf1 Riox1 Ruvbl1 Ruvbl2 Sirt6 Smarca2 Smarca4 Smarcad1 Top1 Tpr Zbtb7a
GO:0007010	cytoskeleton organization	1297	185	108.02	1.4e-13	0.00056	4933427D14Rik Abr Abraxas2 Acta1 Actr1a Add3 Agfg1 Ajuba Akap13 Alkbh4 Arhgap17 Arhgap18 Arhgap25 Arhgef10l Arhgef2 Arhgef28 Arhgef5 Arpin Aurka Bcas3 Bin1 Brwd1 Camsap2 Capg Capn1 Capzb Cavin3 Ccnf Cd2ap Cdc14a Cdc42bpa Cdk2 Cdkn1b Cep126 Cep152 Cep192 Cep290 Cep295 Cflar Chd3 Clip3 Cln3 Cnn2 Coro1b Cul9 Dbn1 Dlc1 Dmtn Dock2 Drg1 Dynlt1b Eml1 Eml4 Enah Epb41l1 Eya1 Ezr Fes Gas2l3 Gas7 Gda Ghrl G…
GO:2000145	regulation of cell motility	939	133	78.2	7.5e-10	0.00062	Abcc1 Abr Adam15 Adam17 Adra2a Ager Ajuba Akt3 Aldoa App Arhgap18 Arhgef2 Atp8a1 Bcas3 Bmpr1a Bmpr2 Camk2b Capn1 Ccn3 Cited2 Cnn2 Col18a1 Coro1b Cpeb1 Csnk2b Cxcl14 Dab2 Dcn Dlc1 Dmtn Dusp22 Ecm1 Ednra Efemp1 Elp1 F7 Fam110c Fbln1 Fes Fgfr1 Flcn Furin Gata3 Glul Gpsm3 Hc Idh2 Inpp5f Irs1 Itga6 Jup Kif20b Kiss1r Klf4 Krt16 Ldb1 Lgr6 Map2k2 Map3k3 Mapk14 Mapk8 Marveld3 Mcam Mcc Mecp2 Mgat3 Mitf Mkk…
GO:0090209	negative regulation of triglyceride meta...	11	5	0.92	0.0012	0.00063	Apobec1 Ccnc Esr1 Pik3cg Sik1
GO:1902075	cellular response to salt	6	4	0.5	0.00063	0.00063	Daxx Hpca Lmnb1 Zc3h12a
GO:1904683	regulation of metalloendopeptidase activ...	6	4	0.5	0.00063	0.00063	Picalm Reck Stat3 Timp3
GO:1905049	negative regulation of metallopeptidase ...	6	4	0.5	0.00063	0.00063	Picalm Reck Timp1 Timp3
GO:0001649	osteoblast differentiation	199	30	16.57	0.00109	0.00064	Acvr2b Adar Asf1a Axin2 Bmpr1a Bmpr2 Cebpd Fam20c Fgfr1 Fhl2 Fzd1 Gdf10 Gja1 Glis1 H3f3a Lgr4 Lox Men1 Pth1r Ptk2 Riox1 Rorb Runx2 Scube2 Spp1 Trp53inp2 Wnt11 Wnt4 Wnt7b Zhx3
GO:0000398	mRNA splicing, via spliceosome	256	40	21.32	8.3e-05	0.00066	Bcas2 Casc3 Dbr1 Ddx23 Ddx39 Ddx46 Dhx16 Esrp1 Esrp2 Fam172a Hnrnpl Ik Jmjd6 Lsm5 Lsm7 Malat1 Nup98 Plrg1 Prdx6 Prpf31 Rbm22 Rbm4b Scaf11 Sf3a1 Sf3a3 Sfpq Smu1 Snrnp70 Son Srrm1 Srrm4 Srsf1 Srsf10 Srsf3 Thrap3 Ubl5 Usp49 Ythdc1 Zbtb7a Zcrb1
GO:0061684	chaperone-mediated autophagy	10	5	0.83	0.0007	0.0007	Atg7 Bag3 Lamp2 Plk3 Synpo2
GO:0006635	fatty acid beta-oxidation	67	14	5.58	0.00107	0.00084	Acaa1a Acox1 Acox3 Cpt2 Dbi Decr1 Echdc2 Ehhadh Etfdh Hadhb Hsd17b4 Irs1 Mlycd Pex5
GO:0120162	positive regulation of cold-induced ther...	96	18	8	0.00088	0.00088	Cnot3 Cpt2 Decr1 Elovl6 Fabp4 G0s2 Gadd45g Gatm Ghrl Gja1 Kdm3a Lepr Lpin1 Pdgfc Prkab1 Sirt6 Stat6 Trpv2
GO:0006406	mRNA export from nucleus	50	10	4.16	0.00737	0.00091	Ddx19a Ddx39 Fyttd1 Nup85 Nup88 Srsf3 Thoc1 Thoc7 Tpr Ythdc1
GO:0010976	positive regulation of neuron projection...	362	53	30.15	4e-05	0.00109	Adam17 Adnp Bmpr2 Cacng7 Camk2b Cflar Cpeb1 Dbn1 Ddx56 Dynlt1b Fbxo38 Fes Fgfr1 Fyn Fzd1 Gprc5b Itga6 Itpr1 Itsn1 Kalrn Kidins220 Kif3c Ltk Map2k2 Mecp2 Mfn1 Ntrk2 Numb Pafah1b1 Pak3 Palm Picalm Plaa Plxna2 Plxnb1 Rgma Rnd2 Robo1 Rrn3 Rufy3 S100a9 Scarf1 Shank1 Shank2 Skil Snap91 Sphk1 Tmem30a Trpv2 Washc5 Wnt5a Zeb2 Zfyve27
GO:0072583	clathrin-dependent endocytosis	36	10	3	0.00053	0.00112	Ap2a2 Ap2b1 Dab2 Dll1 Fcho1 Gak Inpp5f Picalm Snap91 Tnk2
GO:0051770	positive regulation of nitric-oxide synt...	21	7	1.75	0.00112	0.00112	Cpeb1 Fnta Jak3 Map2k4 Nod2 Stat1 Tlr4
GO:0016358	dendrite development	294	37	24.49	0.00771	0.00113	App Camk2b Camsap2 Dab1 Dbn1 Ephb2 Fyn Ghrl Hecw2 Hprt Itsn1 Kalrn Kidins220 Map1a Map2 Mapk8 Matn2 Mecp2 Mfn1 Nck2 Ntrk2 Numb Pafah1b1 Pak3 Palm Picalm Ptprs Robo1 Scarf1 Shank1 Shank2 Sipa1l1 Srcin1 Syne1 Trappc4 Tulp1 Wnt7a
GO:0010971	positive regulation of G2/M transition o...	27	8	2.25	0.0012	0.0012	App Cdc25a Lmnb1 Mecp2 Mta3 Pbx1 Rcc2 Sin3a
GO:0042754	negative regulation of circadian rhythm	18	6	1.5	0.00256	0.0012	Cipc Ghrl Lepr Ptger3 Sfpq Sin3a
GO:0048102	autophagic cell death	11	5	0.92	0.0012	0.0012	Acp2 Atg7 Bnip3 Cdkn1b Trem2
GO:0045332	phospholipid translocation	45	9	3.75	0.01077	0.0012	Abcc1 Atp11b Atp11c Atp8a1 Atp8b1 Atp8b2 Atp9b Slc4a1 Tmem30a
GO:0006468	protein phosphorylation	1817	232	151.33	1.3e-11	0.00125	Acvr2b Adam17 Adar Adnp Adora2a Adra2a Ager Ajuba Akap13 Akt1s1 Akt3 Als2 App Arhgef2 Arhgef5 Arrb2 Aurka Axin2 Axl Bmpr1a Bmpr2 C3 Cacul1 Camk2b Camk2g Card14 Cavin3 Cblb Ccl6 Ccnf Cd80 Cdc42bpa Cdk11b Cdk14 Cdk2 Cdkn1b Celsr3 Cflar Clcf1 Clip3 Cln3 Cnksr3 Cnot9 Cops5 Csnk2a1 Csnk2b Ctnnd1 Ctsg Cysltr2 Dab1 Dab2 Dapk1 Daxx Dcaf1 Dmpk Dmtn Dusp2 Dusp22 Dusp6 Dvl2 Dynlt1b Ednra Efemp1 Eif2a Elp1 E…
GO:0040013	negative regulation of locomotion	316	51	26.32	3.7e-06	0.00131	Abr Adam15 Adora2a Ager Arrdc3 Bmpr1a Ccn3 Cited2 Cnn2 Coro1b Csnk2b Dbn1 Dcn Dlc1 Dusp22 Fbln1 Flcn Gata3 Ghrl Hc Idh2 Jup Kiss1r Klf4 Krt16 Marveld3 Mcc Mecp2 Mitf Myocd Nr2f2 Olfm1 Ptk2 Ptprr Reck Ripor2 Rnf20 Robo1 Robo4 Sema3b Sema3g Sema5b Sema6a Sema6c Stat3 Thy1 Timp1 Tpm1 Wnt11 Wnt4 Wnt5a
GO:0001525	angiogenesis	513	71	42.72	1.6e-05	0.00136	Adam12 Adam15 Ago1 Akt3 Anpep Bcas3 C3 Ccn3 Cela1 Col18a1 Col4a3 Cysltr2 Dcn Dll1 E2f2 Ecm1 Ednra Ephb2 Ephb4 Epn2 Fgfr1 Flcn Ghrl Glul Gpr4 H2-M3 Hc Hk2 Itgb8 Jmjd6 Jup Klf4 Lepr Map3k3 Mapk14 Mapk7 Mcam Mecp2 Mmp19 Nrp2 Ovol2 Pdgfrb Pf4 Pik3cg Plcg1 Plxdc1 Ptgs2 Ptk2 Reck Robo1 Robo4 Runx1 Rxra Sema6a Shc1 Sirt6 Sphk1 Stat1 Stat3 Stk4 Tal1 Tcf4 Thbs2 Thsd7a Thy1 Unc5b Vegfd Wnt5a Wnt7a Wnt7b Zc…
GO:0034720	histone H3-K4 demethylation	7	4	0.58	0.00137	0.00137	Kdm5a Kdm5b Kdm5d Riox1
GO:0035331	negative regulation of hippo signaling	7	4	0.58	0.00137	0.00137	Ajuba Mark3 Wtip Wwc1
GO:0006397	mRNA processing	448	75	37.31	4.2e-09	0.00139	Adar Ahcyl1 Apobec1 App Bcas2 Casc3 Ccar2 Cdk11b Cpeb1 Cpsf1 Cpsf6 Cpsf7 Csdc2 Ctr9 Dbr1 Ddx23 Ddx39 Ddx46 Dhx16 Esrp1 Esrp2 Fam172a Fip1l1 Hnrnpl Ik Jmjd6 Lsm10 Lsm5 Lsm7 Malat1 Mtrex Nono Nup98 Phrf1 Plrg1 Ppp1r8 Prdx6 Prpf31 Puf60 Rbm22 Rbm28 Rbm4b Rnf20 Rpusd3 Scaf11 Scaf4 Sf3a1 Sf3a3 Sfpq Smu1 Snrnp40 Snrnp70 Son Srrm1 Srrm4 Srsf1 Srsf10 Srsf3 Sugp2 Tbrg4 Tent2 Thoc1 Thoc7 Thrap3 Tut1 Ubl5 U…
GO:0002244	hematopoietic progenitor cell differenti...	158	23	13.16	0.00604	0.00142	Adar Ap2a2 Cebpd Cited2 Eml1 Flcn Gata3 Inhba Muc4 Pdgfrb Prrc2c Ptprc Pus7 Rbm47 Runx1 Siglecg Sin3a Sirpa Ston2 Tal1 Tent2 Thsd1 Tmem143
GO:0050772	positive regulation of axonogenesis	102	17	8.49	0.0044	0.00145	Adnp Bmpr2 Dbn1 Map2k2 Ntrk2 Pafah1b1 Picalm Plxna2 Plxnb1 Rnd2 Robo1 Rufy3 Skil Snap91 Trpv2 Zeb2 Zfyve27
GO:0032435	negative regulation of proteasomal ubiqu...	34	9	2.83	0.00146	0.00146	Ccar2 Clec16a Map1a Park7 Rpl11 Rybp Sdcbp Usp7 Wac
GO:0008380	RNA splicing	364	58	30.32	1.3e-06	0.00152	Ahnak2 Bcas2 Casc3 Ccar2 Dbr1 Ddx23 Ddx39 Ddx46 Dhx16 Esrp1 Esrp2 Fam172a Fastk Hnrnpl Ik Jmjd6 Lsm10 Lsm5 Lsm7 Malat1 Mtrex Nono Nup98 Plrg1 Ppp1r8 Prdx6 Prpf31 Puf60 Rbm22 Rbm28 Rbm4b Rps13 Scaf11 Sf3a1 Sf3a3 Sfpq Smu1 Snrnp40 Snrnp70 Son Srrm1 Srrm4 Srsf1 Srsf10 Srsf3 Sugp2 Thoc1 Thoc7 Thrap3 Trpt1 Ubl5 Usp49 Virma Wt1 Ythdc1 Zbtb7a Zcrb1 Zranb2
GO:0045444	fat cell differentiation	238	43	19.82	1.1e-06	0.00179	Adgrf5 Ap1s2 Arntl Bbs12 Bnip3 Ccdc85b Cebpd Clip3 Creb5 Ctbp1 Ctbp2 Enpp1 Ero1l Fabp4 Fbxo9 Fndc5 Gata3 Gdf10 Glis1 Itga6 Klf4 Lpin1 Lpl Mapk14 Mb Mettl8 Mex3c Mkks Nr1d1 Nr4a3 Ptgs2 Rarres2 Sav1 Selenbp1 Stk4 Tbl1x Tcf7l2 Wnt5a Zbtb16 Zbtb7a Zc3h12a Zfp36l1 Zfp385a
GO:0034501	protein localization to kinetochore	17	6	1.42	0.00183	0.00183	Bub3 Cdt1 Ik Rcc2 Ttk Zw10
GO:0046621	negative regulation of organ growth	42	8	3.5	0.02094	0.00192	Cited2 Gja1 Men1 Ptk2 Sav1 Stk4 Tcf7l2 Wwc1
GO:0001731	formation of translation preinitiation c...	12	5	1	0.00192	0.00192	Denr Eif2s3y Eif5 Mcts2 Rps2
GO:0032210	regulation of telomere maintenance via t...	53	8	4.41	0.07062	0.00216	Cct2 Exosc10 Nek7 Pif1 Pot1a Pot1b Smg5 Smg6
GO:0030282	bone mineralization	116	21	9.66	0.00056	0.00221	Acvr2b Atp2b1 Axin2 Bmpr1a Bmpr2 Ecm1 Enpp1 Fam20c Gata1 Gja1 Icmt Lgr4 Lox Ltbp3 Mtss1 Nfe2 Ptgs2 Pth1r Tcf7l2 Wnt11 Wnt4
GO:0071320	cellular response to cAMP	36	9	3	0.00225	0.00225	Dmtn Ezr Hcn4 Inpp5k Itpr1 Itpr3 Pik3cg Wt1 Zfp36l1
GO:0007015	actin filament organization	400	63	33.31	6.7e-07	0.00235	Acta1 Add3 Arhgap17 Arhgap18 Arhgap25 Arhgef10l Arhgef2 Arhgef5 Arpin Bin1 Capg Capn1 Capzb Cd2ap Coro1b Dbn1 Dlc1 Dmtn Enah Ezr Gas7 Ghrl Hax1 Inpp5k Iqgap2 Kirrel Kiss1r Mical3 Mkks Mtss1 Mybpc3 Myh10 Myo1c Myom2 Nck2 Neb Nrap Pak3 Ppm1e Rac3 Rnd2 Rufy3 Scin Shank1 Sirpa Sorbs1 Sorbs2 Specc1l Spta1 Sptbn1 Stmn1 Swap70 Synpo2 Tpm1 Tpm3 Tpm3-rs7 Tpm4 Triobp Vasp Wdr1 Whamm Wnt11 Wnt4
GO:0000132	establishment of mitotic spindle orienta...	30	8	2.5	0.00253	0.00253	Actr1a Arhgef2 Dynlt1b Eya1 Nsfl1c Pafah1b1 Spry1 Zw10
GO:0008298	intracellular mRNA localization	13	6	1.08	0.00034	0.00255	Casc3 Exosc10 Exosc2 Stau1 Zfp36l1 Zfp385a
GO:0060027	convergent extension involved in gastrul...	8	4	0.67	0.00255	0.00255	Dvl2 Nphp3 Wnt11 Wnt5a
GO:2000643	positive regulation of early endosome to...	8	4	0.67	0.00255	0.00255	Dab2 Ezr Msn Vps11
GO:0043406	positive regulation of MAP kinase activi...	220	27	18.32	0.02728	0.00278	Adra2a Ager Ajuba Akap13 Arhgef5 Dab2 Dvl2 Fgfr1 Gadd45g Ghrl Kiss1r Madd Map2k2 Map2k4 Mst1r Nod2 Pdgfc Pdgfrb Pik3cg Ptprc Robo1 Shc1 Shc2 Tlr4 Wnt5a Wnt7b Zeb2
GO:0050771	negative regulation of axonogenesis	67	16	5.58	9.4e-05	0.00286	Dab1 Ephb2 Map2 Ptk2 Ptprs Rgma Rnf6 Rufy3 Sema3b Sema3g Sema5b Sema6a Sema6c Spg20 Thy1 Wnt5a
GO:0007049	cell cycle	1640	227	136.58	4.9e-15	0.00287	4933427D14Rik Abraxas2 Actr1a Adam17 Afap1l2 Ago4 Ahctf1 Ajuba Alkbh4 Anapc1 Anapc10 Angel2 App Arhgef2 Arntl Atad5 Aurka Axin2 Bin1 Btc Btg2 Bub3 Cacul1 Camk2b Camk2g Ccar2 Ccnf Cd28 Cd2ap Cdc14a Cdc23 Cdc25a Cdc27 Cdk11b Cdk14 Cdk2 Cdkn1b Cdkn1c Cdt1 Cep126 Cep152 Cep192 Cep295 Chd3 Chtf8 Cited2 Cops5 Cpeb1 Crlf3 Csnk2a1 Ctbp1 Cul4a Cul9 Daxx Dbf4 Dclre1a Donson Drg1 Dscc1 Dsn1 Dynlt1b E2f2 E2f…
GO:0061099	negative regulation of protein tyrosine ...	27	8	2.25	0.0012	0.00289	Cblb Dusp22 Errfi1 Mvp Ptprc Srcin1 Thy1 Vps25
GO:2000772	regulation of cellular senescence	41	8	3.41	0.01824	0.0029	Akt3 Arntl Bmpr1a H2-M3 Icmt Ing2 Map3k3 Rsl1d1
GO:0006895	Golgi to endosome transport	13	5	1.08	0.0029	0.0029	Eps15 Kif16b Klhl20 Rab14 Wipi1
GO:0051974	negative regulation of telomerase activi...	13	5	1.08	0.0029	0.0029	Men1 Parp3 Pif1 Pot1a Pot1b
GO:0006351	transcription, DNA-templated	2805	388	233.61	6e-26	0.00291	A430033K04Rik Actr5 Acvr2b Adora2a Aebp1 Afap1l2 Ager Ago1 Ahctf1 Ajuba Ankrd42 Anxa4 Apbb3 Apobec1 App Arhgef10l Arhgef2 Arhgef5 Arnt Arntl Arrb2 Atad2b Atmin Atn1 Atp8b1 Atxn7l3 Bag3 Bcas3 Bclaf1 Bicra Bmpr1a Bmpr2 Brd8 Brwd1 Btg2 Calcoco1 Card14 Ccar2 Ccdc85b Ccnc Cd28 Cdk2 Cdkn1b Cdkn1c Cebpd Cela1 Cep290 Cflar Chd5 Chd7 Cic Cipc Cited2 Cnot1 Cnot3 Cops5 Crcp Creb5 Crem Crlf3 Crym Ctbp1 Ctbp2…
GO:0008285	negative regulation of cell population p...	681	85	56.72	0.00011	0.00302	Adora2a Ager App Axin2 Bmpr2 Btg2 Cblb Ccn3 Cd37 Cd80 Cdkn1b Chd5 Cited2 Cpeb1 Dab2 Dlc1 Dll1 Eaf2 Esr1 Fbln1 Flcn Fosl1 Gata1 Gata3 Ghrl Gja1 Gsdme H19 H2-Ab1 H2-M3 Idh2 Ido1 Ift122 Ing1 Ing2 Inhba Kiss1r Klf11 Klf13 Klf4 Marveld3 Mcc Men1 Mtss1 Myocd Ndfip1 Nfe2 Nr2f2 Nup62 Ovol2 Pds5b Plxnb1 Pmp22 Ptgs2 Pth1r Rassf5 Ripor2 Rnf139 Robo1 Runx1 Rxra Sav1 Scgb1a1 Scin Sirt6 Skap2 Slfn2 Smarca2 Spi…
GO:0010977	negative regulation of neuron projection...	175	32	14.57	1.9e-05	0.00305	Adam17 Dab1 Dab2 Efemp1 Ephb2 Gak H2-D1 H2-K1 Inpp5f Map2 Mecp2 Mylip Neo1 Nr2f1 Pafah1b1 Paqr3 Pmp22 Prag1 Ptk2 Ptprs Rap1gap2 Rgma Rnf6 Rufy3 Sema3b Sema3g Sema5b Sema6a Sema6c Spg20 Thy1 Wnt5a
GO:0008360	regulation of cell shape	150	23	12.49	0.00315	0.00315	Aldoa Arhgap18 Brwd1 Cfdp1 Dlc1 Dmtn Ezr Fblim1 Fes Fyn Gas7 Msn Myh10 Myo10 Palm Plxna2 Plxnb1 Prag1 Ptk2 Rnd2 Spta1 Strip2 Wdr1
GO:0007519	skeletal muscle tissue development	197	22	16.41	0.09715	0.00323	Acta1 Arntl Btg2 Cflar Cited2 Dll1 Foxl2 Gpcpd1 Hivep3 Hoxd9 Kel Mapk14 Mettl8 Myocd Nr2f2 Pmp22 Ripor2 Sin3b Skil Svil Taz Tcf7l2
GO:0051056	regulation of small GTPase mediated sign...	259	47	21.57	3e-07	0.00329	Abr Akap13 Als2 Arhgap18 Arhgap25 Arhgef10l Arhgef2 Arhgef28 Arhgef3 Arhgef40 Arhgef5 Arhgef6 Cd2ap Cdc42bpa Dlc1 Dock2 Ephb2 Eps8l2 F2rl3 Flcn Gpr35 Gpr4 Icmt Iqsec2 Itpkb Itsn1 Kalrn Madd Mcf2l Nup62 Pdgfrb Plekhg5 Prag1 Psd2 Psd4 Ralgapb Ralgps1 Rap1gap2 Rasgrf1 Rgl2 Ripor2 Robo1 Sipa1l1 Sipa1l2 Spry1 Ssx2ip Stmn1
GO:0048747	muscle fiber development	82	15	6.83	0.00293	0.00342	Acta1 Capzb Flnc Kel Lox Mybpc3 Myh11 Myo18b Myom2 Neb Nrap Pmp22 Ripor2 Sgcb Uchl1
GO:0006367	transcription initiation from RNA polyme...	62	12	5.16	0.00462	0.00344	Esr1 Gtf2a2 Gtf2e1 Gtf2f1 Hey2 Med24 Psmc3 Taf11 Taf2 Taf4 Tcf4 Thrap3
GO:0040037	negative regulation of fibroblast growth...	19	6	1.58	0.00348	0.00348	Gata3 Ofd1 Spry1 Tcf7l2 Wnt4 Wnt5a
GO:2000114	regulation of establishment of cell pola...	19	6	1.58	0.00348	0.00348	Bcas3 Flot2 Gata3 Kif20b Ripor2 Rufy3
GO:0006417	regulation of translation	332	46	27.65	0.00045	0.00359	Aco1 Ago1 Ago4 Alkbh1 App Btg2 Casc3 Cnot1 Cnot10 Cnot11 Cnot3 Cnot9 Cpeb1 Dapk1 Eif2a Eif2b5 Eif2s3y Eif5 Hnrnpl Hnrnpr Igf2bp1 Igf2bp3 Larp4b Larp6 Mknk2 Mvk Nck2 Ogfod1 Otud6b Pa2g4 Pus7 Rbm4b Rnf139 Rpl10 Rpusd3 Rxra S100a9 Samd4 Stat3 Tpr Trnau1ap Wt1 Zc3h12a Zfp36l1 Zfp36l3 Zfp385a
GO:0051301	cell division	574	77	47.8	2.1e-05	0.00373	Abraxas2 Ahctf1 Alkbh4 Anapc1 Anapc10 Arhgef2 Aurka Btc Bub3 Ccnf Cd2ap Cdc14a Cdc23 Cdc25a Cdk14 Cdk2 Cdt1 Daxx Dclre1a Dll1 Dsn1 E4f1 Evi5 Fgfr1 Flcn Ing2 Kif20b Klhl42 Maea Map4 Men1 Mical3 Myh10 Ncoa3 Numb Nup62 Nusap1 Opn1mw Orc6 Pafah1b1 Pard3 Pard6a Pard6g Pdgfc Pds5b Pkp4 Plk3 Rbl2 Rcc2 Ruvbl1 Sac3d1 Senp5 Sept2 Sept4 Setdb2 Smc5 Son Specc1l Spg20 Sptbn1 Stag1 Stag2 Stmn1 Syce1 Tacc1 Tal1…
GO:0031175	neuron projection development	1083	163	90.2	4.8e-14	0.00375	Acap3 Adam17 Adnp Adora2a Ager Alcam Alkbh1 Als2 App Arhgef28 Atg7 Aurka Bex1 Bicdl1 Bmpr2 Btg2 Cacng7 Camk2b Camsap2 Capzb Ccdc141 Cdh23 Celsr3 Cflar Col25a1 Cpeb1 Dab1 Dab2 Dbn1 Ddx56 Dynlt1b Efemp1 Efhd1 Enah Ephb2 Ephb4 Ext1 Fbxo38 Fes Fgfr1 Fyn Fzd1 Gak Gas7 Gata3 Ghrl Gja1 Gprc5b H2-D1 H2-K1 Hdgfl3 Hecw2 Hprt Inpp5f Itga6 Itpr1 Itsn1 Kalrn Kel Kidins220 Kif13b Kif20b Kif3c Kirrel3 Klf4 Lamc…
GO:0043065	positive regulation of apoptotic process	632	80	52.63	0.00011	0.00379	Adam17 Adora2a Ager Aifm2 Arrb2 Atg7 Bad Bclaf1 Bin1 Bnip3 Camk2b Capn1 Ccar2 Clip3 Col18a1 Col4a3 Dapk1 Daxx Ddx19a Dffa Dlc1 Dusp6 Eif2b5 Flcn Fosl1 Foxl2 G0s2 Gadd45g Gsdme H2-M3 Hcar2 Ido1 Inhba Itga6 Itpr1 Jak3 Klf11 Ltk Malt1 Map2k4 Mapk8 Men1 Nck2 Nr4a3 Olfm1 Pak3 Park7 Pdgfrb Pidd1 Plcg1 Ptgs2 Ptpa Ptprc Robo1 Rpl11 Rxra Rybp S100a9 Sav1 Scin Sept4 Sfpq Skil Stat1 Stk4 Tcf7l2 Timp3 Tlr4 T…
GO:0035025	positive regulation of Rho protein signa...	32	8	2.67	0.00391	0.00391	Akap13 F2rl3 Gpr35 Gpr4 Mcf2l Pdgfrb Prag1 Robo1
GO:0001501	skeletal system development	530	77	44.14	1.1e-06	0.00414	Acp2 Acvr2b Akap13 Alpl Anxa6 Axin2 Bbx Bmpr1a Bmpr2 Ccn3 Cdkn1c Chad Chd7 Cited2 Cldn18 Col12a1 Col4a3 Col5a2 Ecm1 Efemp1 Ext1 Eya1 Fam20c Fbn1 Fgfr1 Flvcr1 Foxn3 Ghrl Gja1 Gna11 Gpr68 Hoxa10 Hoxa9 Hoxb2 Hoxb5 Hoxd11 Hoxd9 Itgb8 Lncpint Lox Lrrk1 Ltbp3 Mapk14 Matn2 Mbtps2 Men1 Mex3c Mkks Nbeal2 Npr2 Nsd2 Pafah1b1 Pbx1 Pdgfc Pdgfrb Plxnb1 Prrx1 Pth1r Ptprc Rai1 Recql4 Runx1 Runx2 Scube2 Sik3 Spef…
GO:0021895	cerebral cortex neuron differentiation	25	7	2.08	0.00346	0.0042	Chd5 Hprt Lhx6 Pafah1b1 Pex5 Rac3 Sin3a
GO:2000036	regulation of stem cell population maint...	33	7	2.75	0.01713	0.00421	Cnot1 Cnot3 Kdm3a Ncoa3 Pax8 Sav1 Tal1
GO:0071709	membrane assembly	36	7	3	0.02694	0.00421	Ephb2 Flot2 Gak Picalm Sptbn1 Tlcd1 Ugcg
GO:0045647	negative regulation of erythrocyte diffe...	14	5	1.17	0.00421	0.00421	Klf13 Ldb1 Lmo2 Tal1 Zfp36l1
GO:0042254	ribosome biogenesis	294	44	24.49	0.00011	0.00421	Chd7 Cul4a Ddx27 Ddx56 Dimt1 Efl1 Eif2a Exosc1 Exosc10 Exosc2 Exosc7 Fdxacb1 Gar1 Glul Gtf3a Gtpbp10 Ipo4 Ltv1 Lyar Mettl15 Mphosph10 Mrps9 mt-Rnr1 mt-Rnr2 Mterf4 Mtrex Noc2l Nol10 Nop14 Nup88 Nvl Pa2g4 Pop7 Riox1 Rpl10 Rpl11 Rpl23a Rps2 Rrn3 Rrp7a Rsl1d1 Sdad1 Urb1 Urb2
GO:0022604	regulation of cell morphogenesis	523	80	43.56	7.9e-08	0.00424	Adnp Ago4 Aldoa Arhgap18 Bmpr2 Brwd1 Cacng7 Camk2b Capzb Cfdp1 Coro1b Dab1 Dab2 Dbn1 Dlc1 Dmtn Ephb2 Ezr Fblim1 Fbln1 Fes Fyn Gas7 Hecw2 Kalrn Kel Kif13b Map2 Map2k2 Mecp2 Mfn1 Msn Myh10 Myo10 Ntrk2 Numb Olfm1 Pafah1b1 Pak3 Palm Picalm Plaa Plxna2 Plxnb1 Prag1 Ptk2 Ptprs Rac3 Rcc2 Rgma Rnd2 Rnf6 Robo1 Rufy3 Sema3b Sema3g Sema5b Sema6a Sema6c Sh3d19 Sin3a Sipa1l1 Skil Snap91 Spg20 Spta1 Srcin1 Str…
GO:0034058	endosomal vesicle fusion	9	4	0.75	0.00429	0.00429	Ankfy1 Sphk1 Vps11 Vps4a
GO:0035023	regulation of Rho protein signal transdu...	135	26	11.24	4.5e-05	0.00459	Abr Akap13 Als2 Arhgef10l Arhgef2 Arhgef28 Arhgef3 Arhgef40 Arhgef5 Arhgef6 Dlc1 Eps8l2 F2rl3 Flcn Gpr35 Gpr4 Itsn1 Kalrn Mcf2l Pdgfrb Plekhg5 Prag1 Rasgrf1 Ripor2 Robo1 Stmn1
GO:0120163	negative regulation of cold-induced ther...	47	10	3.91	0.00467	0.00467	Acvr2b Adam17 Arntl Arrdc3 Flcn Lgr4 Nr1d1 Nr1h3 Tle3 Tlr4
GO:0007026	negative regulation of microtubule depol...	33	8	2.75	0.00479	0.00479	Arhgef2 Camsap2 Eml4 Hdgfl3 Map1a Map2 Mid1 Specc1l
GO:0030097	hemopoiesis	921	126	76.7	1.7e-08	0.00492	Adam17 Adar Adgrf5 Ager Ahctf1 Ap2a2 App Atg7 Atp11c Axl Bad Cd28 Cdkn1c Cebpd Chd7 Cited2 Clcf1 Cldn18 Clec2d Clptm1 Cnn2 Cnot4 Cr2 Ctr9 Cul4a Dab2 Dcaf1 Dll1 Dmtn Dock2 Eml1 Fam20c Fbn1 Fes Fgl2 Flcn Flvcr1 Gabpa Gadd45g Gata1 Gata3 Gon4l Gpr68 H2-Ab1 H2-M3 Hax1 Hba-a1 Hba-a2 Hba-x Hectd1 Hoxa9 Ifne Il1rl2 Inhba Itpkb Jak3 Jmjd6 Kirrel3 Klf13 Klf4 Ldb1 Lepr Lmo2 Lox Lrrk1 Ly9 Lyar Maea Malt1 Ma…
GO:1902041	regulation of extrinsic apoptotic signal...	47	11	3.91	0.00136	0.00504	Cflar Dapk1 Fem1b Madd Park7 Rffl Skil Stk4 Timp3 Tmc8 Tnfrsf23
GO:0036035	osteoclast development	16	6	1.33	0.00127	0.00506	Cldn18 Fam20c Fbn1 Gpr68 Lrrk1 Pafah1b1
GO:0048333	mesodermal cell differentiation	23	6	1.92	0.0097	0.00506	Bmpr1a Eya1 Fgfr1 Inhba Kdm6a Tal1
GO:0048659	smooth muscle cell proliferation	168	18	13.99	0.16195	0.00506	Ager Bmpr1a Ccn3 Cdkn1b Ednra Esr1 Il6ra Kalrn Klf4 Mnat1 Myocd Nr4a3 Pdgfrb Ptgs2 Ptk2 Shc1 Stat1 Tcf7l2
GO:0072102	glomerulus morphogenesis	11	4	0.92	0.00982	0.00507	Ctnnd1 Kirrel3 Mtss1 Pdgfrb
GO:0001915	negative regulation of T cell mediated c...	5	3	0.42	0.00507	0.00507	H2-M3 Muc4 Ptprc
GO:0019441	tryptophan catabolic process to kynureni...	5	3	0.42	0.00507	0.00507	Ido1 Ido2 Tdo2
GO:0032484	Ral protein signal transduction	5	3	0.42	0.00507	0.00507	Ralgapb Ralgps1 Rgl2
GO:0045829	negative regulation of isotype switching	5	3	0.42	0.00507	0.00507	Ndfip1 Parp3 Thoc1
GO:0048386	positive regulation of retinoic acid rec...	5	3	0.42	0.00507	0.00507	Ctbp2 Nr2c1 Trim16
GO:0060137	maternal process involved in parturition	5	3	0.42	0.00507	0.00507	Arntl Kalrn Ldoc1
GO:2000325	regulation of nuclear receptor transcrip...	5	3	0.42	0.00507	0.00507	Cnot9 Nr1h3 Tacc1
GO:1901380	negative regulation of potassium ion tra...	26	4	2.17	0.16644	0.00508	Bin1 Kel Oxsr1 Ptger3
GO:0017148	negative regulation of translation	136	22	11.33	0.00194	0.00528	Ago1 Ago4 Btg2 Cnot1 Cnot10 Cnot3 Cnot9 Cpeb1 Dapk1 Hnrnpr Igf2bp1 Mvk Otud6b Pus7 Rnf139 Samd4 Stat3 Tpr Wt1 Zc3h12a Zfp36l1 Zfp36l3
GO:0042127	regulation of cell population proliferat...	1649	200	137.33	2.5e-08	0.00531	Adam17 Adk Adora2a Ager Akt3 Apobec1 App Atad5 Axin2 Bad Bex1 Bmpr1a Bmpr2 Btc Btg2 Cacul1 Cblb Ccn3 Cd244a Cd28 Cd37 Cd80 Cdk2 Cdkn1b Cela1 Cfdp1 Cflar Chd5 Cited2 Clcf1 Clec11a Cnn2 Col18a1 Cpeb1 Csnk2a1 Cul4a Dab2 Dlc1 Dll1 Dusp22 Dvl2 Eaf2 Ecm1 Ednra Efemp1 Egln3 Eps15 Errfi1 Esr1 Esrp1 Esrp2 Eya1 Fabp4 Fancl Fbln1 Fes Fgfr1 Flcn Fnta Fosl1 Fosl2 Gak Gata1 Gata3 Ghrh Ghrl Gid8 Gja1 Glul Gsdme…
GO:0000082	G1/S transition of mitotic cell cycle	171	24	14.24	0.00805	0.00539	Adam17 Cacul1 Camk2b Camk2g Cdc25a Cdk2 Cdkn1b Crlf3 Cul4a Dbf4 E2f6 Hinfp Inhba Klf11 Klf4 Lsm10 Mnat1 Npat Phf8 Pidd1 Plk3 Plrg1 Rbl2 Rpl17
GO:0043087	regulation of GTPase activity	295	47	24.57	1.2e-05	0.00549	Abr Adap2 Ajuba Als2 Arap2 Arhgap1 Arhgef5 Arrb2 Bcas3 Bin1 Cblb Ccl6 Dennd1b Dvl2 Eif5 Evi5 Flcn Iqgap2 Itga6 Kalrn Mkks Ntrk2 Ocrl Pafah1b1 Picalm Pip5k1a Pkp4 Plxna2 Plxnb1 Pot1b Rab3gap2 Rabgap1 Ralgapb Rapgef6 Rasgrf1 Rcc2 Rgma Rgs8 Sbf1 Sipa1l1 Spry1 Tax1bp3 Tbc1d22b Thy1 Wnt11 Wnt4 Wnt5a
GO:0001764	neuron migration	185	32	15.41	5.9e-05	0.00556	Acap3 Adam17 Alkbh1 Arhgef2 Axl Camk2b Celsr3 Dab1 Fyn Gata3 Gja1 Kif20b Kirrel3 Lhx6 Mapk8 Matn2 Myh10 Nav1 Neo1 Neurog2 Nr2f1 Nr2f2 Nrp2 Ntrk2 Olfm1 Pafah1b1 Pex5 Plaa Ptk2 Sema6a Stat3 Ulk4
GO:0006979	response to oxidative stress	400	53	33.31	0.00052	0.00566	Abcc1 Adnp2 Als2 App Arnt Arntl Atg7 Axl Bnip3 Camk2g Capn1 Cflar Cyp11a1 Dapk1 Dgkk Ercc6l2 Etfdh Fut8 Fyn Fzd1 Gja3 Glrx2 Gpx3 Hp Hsph1 Mapk7 Mapk8 Mb Mgat3 Naprt Ndufs2 Ndufs8 Nono Nr4a3 Nudt15 Oxsr1 Park7 Pdgfrb Pla2r1 Plk3 Prdx6 Ptgs2 Rbpms Sfpq Sin3a Sirpa Slc4a1 Sphk1 Stat6 Stc2 Tlr4 Uaca Zc3h12a
GO:0045494	photoreceptor cell maintenance	41	9	3.41	0.00575	0.00575	Bbs10 Bbs12 Cdh23 Cdhr1 Cep290 Map1a Mkks Nphp3 Tulp1
GO:0030308	negative regulation of cell growth	194	32	16.16	0.00015	0.00578	Adam15 Bmpr2 Ccar2 Ccdc85b Ccn3 Cdkn1b Crlf3 Dab2 Dnajc2 Eaf2 Enpp1 Flcn Gja1 Inhba Map2 Mecp2 Prdm4 Ptprs Rgma Rnf6 Sema3b Sema3g Sema5b Sema6a Sema6c Smarca2 Smarca4 Spg20 St7l Wnt11 Wnt5a Wt1
GO:0007097	nuclear migration	32	8	2.67	0.00391	0.00587	Actr1a Cdc42bpa Myh10 Pafah1b1 Ptk2 Syne1 Syne2 Tacc1
GO:0043249	erythrocyte maturation	15	5	1.25	0.00589	0.00589	Flvcr1 Hba-x Maea Tal1 Zbtb7a
GO:0032693	negative regulation of interleukin-10 pr...	21	6	1.75	0.00602	0.00602	Ager Dll1 Ido1 Jak3 Tnfrsf21 Tnfrsf9
GO:1900017	positive regulation of cytokine producti...	21	6	1.75	0.00602	0.00602	Ankrd42 Gbp5 Gpsm3 Kpna6 Nod2 Tlr4
GO:0030198	extracellular matrix organization	271	36	22.57	0.0036	0.0063	Adamts2 Aebp1 App Cflar Col10a1 Col18a1 Col25a1 Col4a3 Col5a2 Colgalt1 Ctss Ecm2 Efemp2 Elf3 Ero1l Fbln1 Kazald1 Lamc1 Lox Lum Mmp10 Mmp12 Mmp19 Mmp1b Myh11 Nfkb2 Nphp3 Phldb1 Plod2 Pmp22 Pomt1 Ptk2 Reck Smarca4 Spint1 Wt1
GO:0051726	regulation of cell cycle	954	139	79.45	4.2e-11	0.00651	Adam17 Afap1l2 Ahctf1 Anapc1 Angel2 App Arntl Atad5 Aurka Axin2 Bin1 Btc Btg2 Bub3 Camk2b Ccar2 Ccnf Cd28 Cdc14a Cdc23 Cdc25a Cdc27 Cdk11b Cdk2 Cdkn1b Cdkn1c Cdt1 Cep192 Cep295 Cited2 Cops5 Crlf3 Csnk2a1 Ctbp1 Cul4a Cul9 Dbf4 Donson Drg1 E2f2 E2f6 E4f1 Esr1 Fbxl18 Fem1b Fen1 Fgfr1 Flcn Fnta Fosl1 Gadd45g Gata3 H2-M3 Hecw2 Hinfp Hus1 Ik Inhba Kif20b Klf4 Lmnb1 Lrrk1 Lsm10 Madd Mapk14 Mapk8 Mecp2 M…
GO:0051259	protein complex oligomerization	617	68	51.39	0.0107	0.00656	Adsl Als2 Anxa6 App Birc3 Camk2g Chrna2 Clpp Cpsf6 Cpsf7 Cuta Dcxr Decr1 Dffb Dvl2 Gbp5 Gja1 Glul Gna11 Gpx3 H2-M3 Hbb-bh1 Hmgcl Hprt Ide Irs1 Itpr1 Itpr3 Jmjd6 Jup Kcna7 Kcnj12 Kctd12 Lamp2 Malt1 Med24 Mlc1 Nod2 Nup62 Olfm1 Oxa1l Pex11b Pex14 Pex5 Pfkl Pmp22 Prf1 Prkab1 Ripor2 Rrm2 Rxra Samhd1 Sept4 Shkbp1 Skil Slc4a1 Snx2 Stom Tdo2 Thg1l Tmc8 Tmem173 Tnfrsf9 Trim6 Trp53bp1 Trpm6 Vasp Zc3h12a
GO:0050870	positive regulation of T cell activation	187	28	15.57	0.00174	0.00657	Adk Ager Bad Cd244a Cd28 Cd80 Ephb4 Fam49b Flot2 Gata3 H2-Ab1 H2-M3 Hsph1 Il12rb1 Il1rl2 Il6ra Itpkb Jak3 Malt1 Nck2 Ptprc Runx1 Sash3 Sirpa Slc4a1 Spta1 Thy1 Zbtb16
GO:0060765	regulation of androgen receptor signalin...	26	7	2.17	0.0044	0.00667	Arrb2 Dab2 Kdm5d Park7 Rnf6 Smarca4 Zbtb7a
GO:0048382	mesendoderm development	10	4	0.83	0.00669	0.00669	Bmpr1a Foxa2 Ldb1 Zfp36l1
GO:0060907	positive regulation of macrophage cytoki...	10	4	0.83	0.00669	0.00669	Gprc5b H2-M3 Tlr4 Wnt5a
GO:0061626	pharyngeal arch artery morphogenesis	10	4	0.83	0.00669	0.00669	Adgrf5 Bmpr1a Bmpr2 Smarca4
GO:0008283	cell population proliferation	1996	248	166.23	3.7e-11	0.00671	Adam17 Adk Adora2a Ager Akt3 Apobec1 App Arhgef2 Atad5 Axin2 Bad Bex1 Bmpr1a Bmpr2 Btc Btg2 Cacul1 Cblb Ccn3 Cd244a Cd28 Cd37 Cd80 Cdk2 Cdkn1b Cela1 Cfdp1 Cflar Chd5 Cited2 Clcf1 Clec11a Cnn2 Col18a1 Col4a3 Cpeb1 Cr2 Csnk2a1 Ctps Cul1 Cul4a Dab2 Dbi Dbn1 Dlc1 Dll1 Dock2 Dusp22 Dvl2 Eaf2 Ecm1 Ednra Efemp1 Egln3 Eml1 Eps15 Errfi1 Esr1 Esrp1 Esrp2 Eya1 Fabp4 Fancl Fbln1 Fes Fgfr1 Flcn Fnta Fosl1 Fos…
GO:0051091	positive regulation of DNA-binding trans...	244	43	20.32	2.1e-06	0.00686	Ager Ankrd42 App Arhgef2 Arhgef5 Card14 Cflar Cops5 Dvl2 Esr1 Flot2 Fosl1 Fzd1 Gtf2a2 Hmgn3 Ikbkg Il18rap Jup Lrrfip1 Lrrfip2 Malt1 Mbtps2 Myocd Ncoa3 Neurog2 Nod2 Park7 Prkch Rab7b Ripk4 Ror1 Rps6ka5 Sav1 Smarca4 Sphk1 Stat3 Tlr4 Tmem173 Tnfrsf8 Trim13 Trim26 Wnt5a Zbtb7a
GO:0003156	regulation of animal organ formation	44	9	3.66	0.00929	0.00691	Cited2 Eya1 Fgfr1 Hoxd11 Pim1 Robo1 Spry1 Wnt5a Wt1
GO:0002761	regulation of myeloid leukocyte differen...	125	15	10.41	0.09652	0.00691	Cldn18 Clec2d Cul4a Fbn1 Fes Gpr68 Hax1 Mitf Ndfip1 Pf4 Runx1 Tal1 Trem2 Zbtb7a Zfp36l1
GO:1902992	negative regulation of amyloid precursor...	17	5	1.42	0.01054	0.00692	Bin1 Flot2 Olfm1 Picalm Spon1
GO:0031453	positive regulation of heterochromatin a...	11	4	0.92	0.00982	0.00692	Pphln1 Resf1 Sirt6 Tpr
GO:1901977	negative regulation of cell cycle checkp...	7	3	0.58	0.01563	0.00693	Aurka Cdt1 Thoc1
GO:0046823	negative regulation of nucleocytoplasmic...	22	4	1.83	0.10526	0.00693	Nup153 Park7 Pkia Tpr
GO:0072273	metanephric nephron morphogenesis	22	4	1.83	0.10526	0.00693	Lgr4 Pax8 Wnt4 Wt1
GO:0061213	positive regulation of mesonephros devel...	25	4	2.08	0.1501	0.00693	Gata3 Lgr4 Pax8 Wt1
GO:0002418	immune response to tumor cell	24	3	2	0.3228	0.00694	Adam15 Muc4 Prf1
GO:0045747	positive regulation of Notch signaling p...	40	9	3.33	0.00484	0.00699	Ccn3 Dll1 Epn2 Eya1 Nod2 Reck Robo1 Slc35c2 Stat3
GO:0006355	regulation of transcription, DNA-templat...	2710	367	225.7	9.4e-23	0.0071	A430033K04Rik Actr5 Acvr2b Adora2a Aebp1 Afap1l2 Ager Ago1 Ahctf1 Ajuba Ankrd42 Anxa4 Apbb3 Apobec1 App Arhgef10l Arhgef2 Arhgef5 Arnt Arntl Arrb2 Atad2b Atmin Atn1 Atp8b1 Atxn7l3 Bag3 Bcas3 Bclaf1 Bicra Bmpr1a Bmpr2 Brd8 Brwd1 Btg2 Calcoco1 Card14 Ccar2 Ccdc85b Ccnc Cd28 Cdk2 Cdkn1b Cdkn1c Cebpd Cela1 Cep290 Cflar Chd5 Chd7 Cic Cipc Cited2 Cnot1 Cnot3 Cops5 Creb5 Crem Crlf3 Crym Ctbp1 Ctbp2 Ctr9…
GO:0006606	protein import into nucleus	151	26	12.58	0.0003	0.00727	Adar Arntl Bag3 Fam53a Fam53c Ing1 Ipo4 Jup Kpna6 Mapk14 Mmp12 Nup153 Nup50 Nup62 Nup85 Nup88 Nup98 Nutf2 Pkia Ptgs2 Rbm22 Stat3 Tnpo1 Tpr Uaca Zc3h12a
GO:0051028	mRNA transport	108	21	8.99	0.0002	0.0075	Ahctf1 Casc3 Cpeb1 Ddx19a Ddx39 Fyttd1 Igf2bp1 Igf2bp3 Myo1c Nup62 Nup85 Nup88 Nup98 Ranbp17 Srsf1 Srsf3 Thoc1 Thoc7 Tpr Ythdc1 Zfp36l1
GO:0019827	stem cell population maintenance	165	27	13.74	0.00053	0.00754	Bmpr1a Cnot1 Cnot3 Ctr9 Cul4a Dll1 Fgfr1 Igf2bp1 Kdm3a Klf4 Ldb1 Mapk8 Med15 Med24 Med7 Ncoa3 Pax8 Prrx1 Rtf1 Sav1 Setd6 Smarca4 Stag2 Stat3 Tal1 Tcf7l2 Wnt7a
GO:0007155	cell adhesion	1298	156	108.1	1.6e-06	0.00765	Adam12 Adam15 Adam17 Adam19 Adk Adora2a Ager Ajuba Alcam Apbb1ip App Axl Bad Bcas3 Capn1 Cblb Ccdc141 Ccn3 Cd244a Cd28 Cd2ap Cd80 Cdh23 Cdhr1 Celsr3 Cfdp1 Cited2 Col12a1 Col18a1 Col4a3 Ctnnal1 Ctnnd1 Dab1 Dab2 Dbn1 Dlc1 Dlg2 Dll1 Dmtn Dusp22 Ecm2 Ephb4 Fam49b Fblim1 Fbln1 Fbn1 Fes Fgl2 Flcn Flot2 Fndc3a Gata1 Gata3 H2-Ab1 H2-M3 Hsph1 Ido1 Il12rb1 Il1rl2 Il6ra Itga6 Itgb8 Itpkb Jak3 Jup Kifc3 Kirr…
GO:0007338	single fertilization	139	17	11.58	0.07042	0.00769	Aldoa Camk2b Cct2 Fam170b Foxl2 H3f3a Hoxa10 Hoxa9 Hoxd11 Hoxd9 Kdm5b Lhfpl2 Lrmp Park7 Pkdrej Unc13b Wt1
GO:0032922	circadian regulation of gene expression	66	12	5.5	0.00775	0.00775	Arntl Cavin3 Crem Kdm5a Lgr4 Ncoa2 Nr1d1 Ppp1cc Prkg2 Rai1 Rbm4b Top1
GO:0016477	cell migration	1448	193	120.59	2.1e-11	0.00778	2610528A11Rik Abcc1 Abr Acap3 Adam15 Adam17 Adra2a Ager Ajuba Akt3 Aldoa Alkbh1 Anxa6 App Arhgef2 Arhgef5 Arrb2 Atn1 Atp8a1 Axl Bcas3 Bmpr1a Bmpr2 Camk2b Capn1 Ccdc141 Ccl6 Ccn3 Cd2ap Cdc42bpa Celsr3 Cited2 Cln3 Cnn2 Col18a1 Coro1b Cpeb1 Csnk2b Cul5 Cxcl14 Cxcl2 Cxcr1 Dab1 Dab2 Dcn Dlc1 Dmtn Dusp22 Ecm1 Ednra Efemp1 Elmo3 Elp1 Ephb4 F7 Fam110c Fbln1 Fcgr3 Fgfr1 Flcn Furin Fut8 Fyn Gata3 Gja1 Glul…
GO:0021954	central nervous system neuron developmen...	91	18	7.58	0.00045	0.00786	Arhgef28 Atg7 Btg2 Ephb2 Fgfr1 Hprt Lhx6 Map2 Neurog2 Nrp2 Ntrk2 Pafah1b1 Prdm8 Ptk2 Rac3 Robo1 Wnt5a Zeb2
GO:0051489	regulation of filopodium assembly	47	9	3.91	0.01426	0.00796	Bcas3 Capzb Cln3 Dbn1 Dmtn Myo10 Myo3b Palm Ripor2
GO:0051693	actin filament capping	37	8	3.08	0.0099	0.00796	Add3 Capg Capzb Dmtn Scin Spta1 Sptbn1 Tpm1
GO:0042307	positive regulation of protein import in...	43	9	3.58	0.00796	0.00796	Bag3 Jup Mapk14 Nutf2 Ptgs2 Rbm22 Tpr Uaca Zc3h12a
[truncated: 324 more rows]

## Sheet: Supplementary_file_1g
	Cell_type	Frequency	Proportions
1	Basophil(Placenta)	41	0.00943396
2	Bcell(Placenta)	35	0.00805338
[truncated: 26 more rows]
