# Supplementary figures and images for: Determining the effects of paternal obesity on sperm chromatin at histone H3 lysine 4 tri-methylation in relation to the placental transcriptome and cellular composition
Source: eLife journal article supplement (doi:10.7554/elife.83288), 2024-11-29

Figure 6 - Figure supplement 1

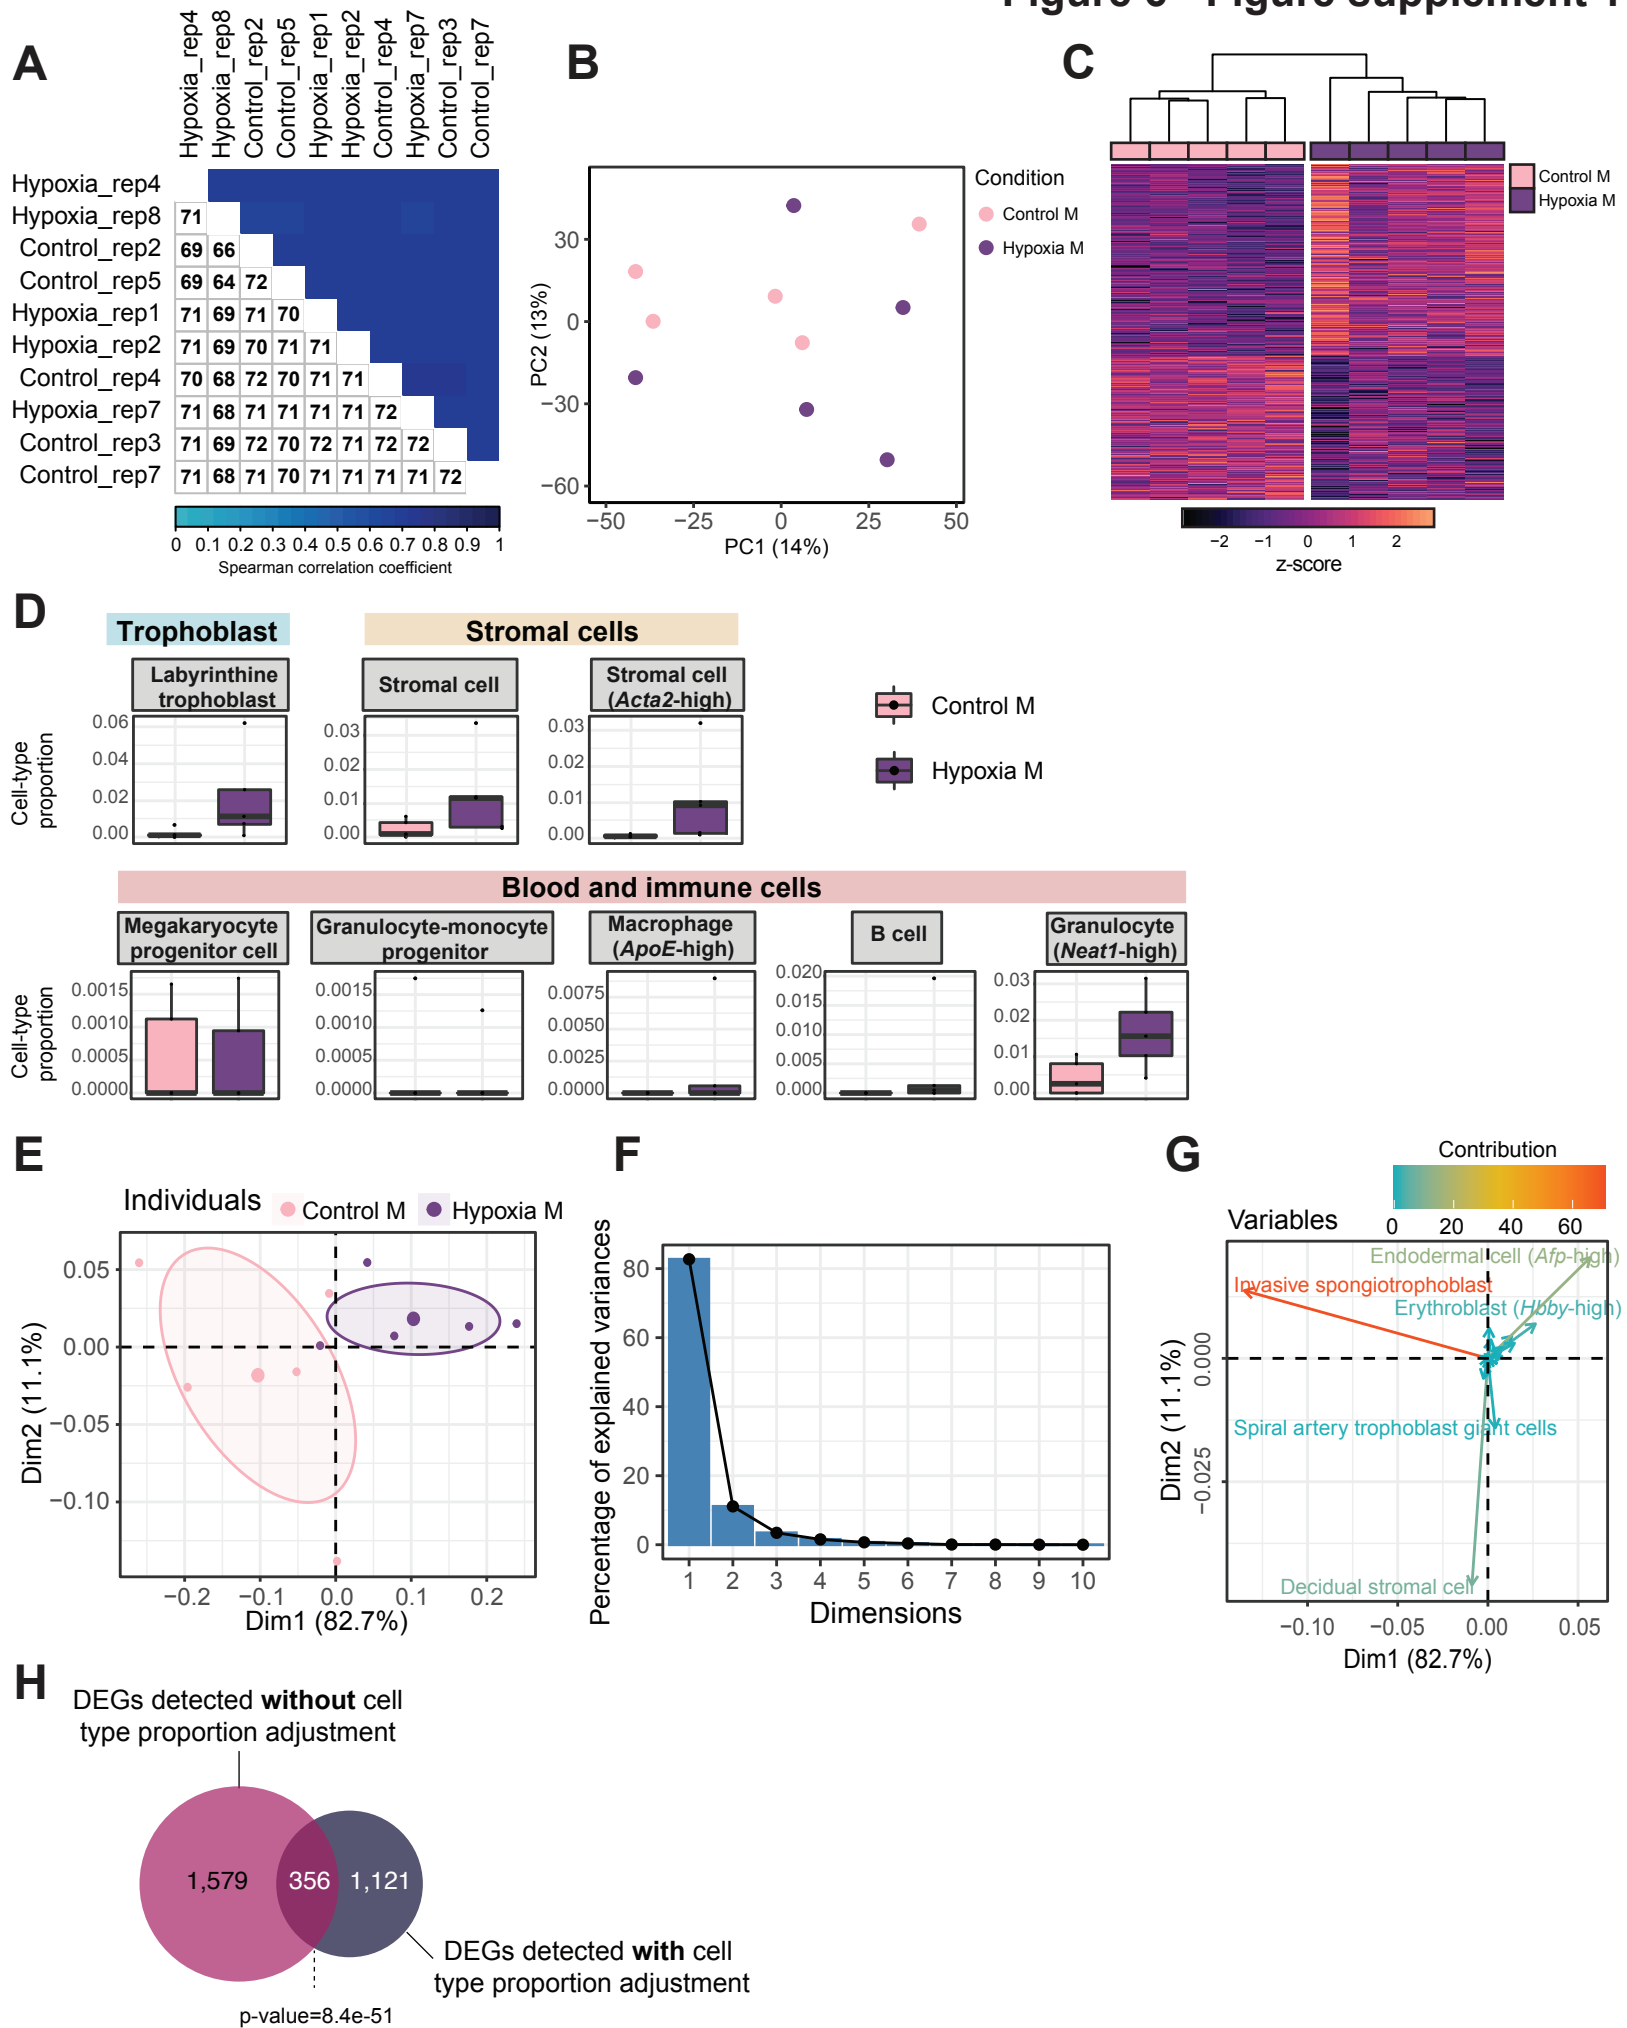

Supplement: supp [file elife-83288-supp-v1.zip]

A

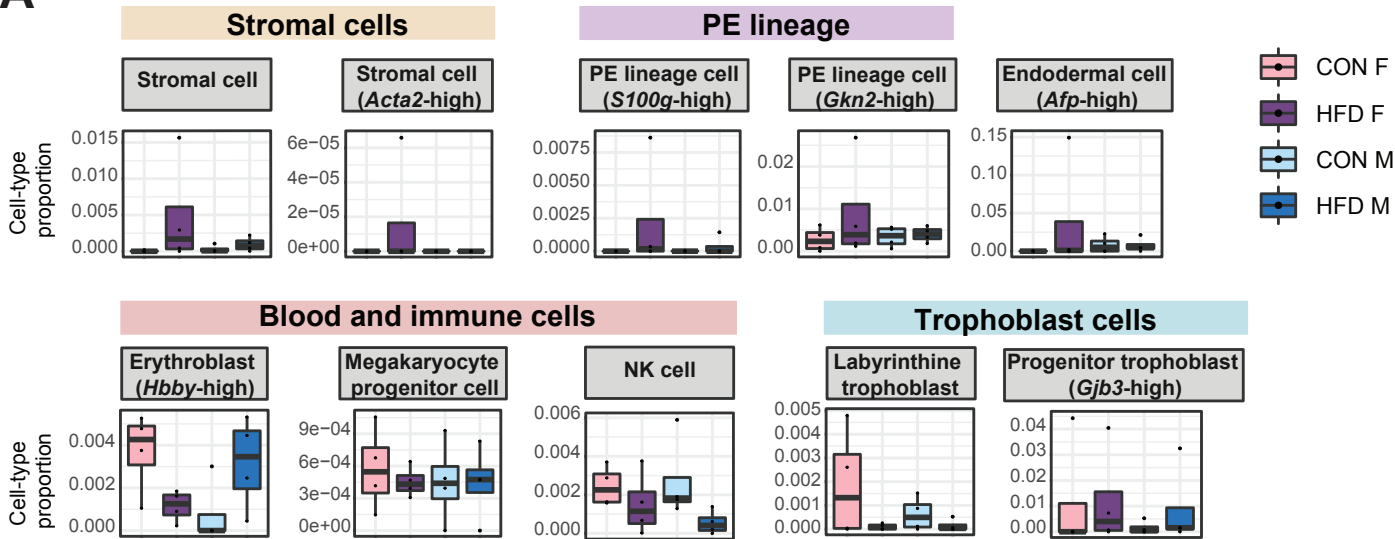

Supplement: supp [file elife-83288-supp-v1.zip]

**Figure 2 - Figure supplement 1**

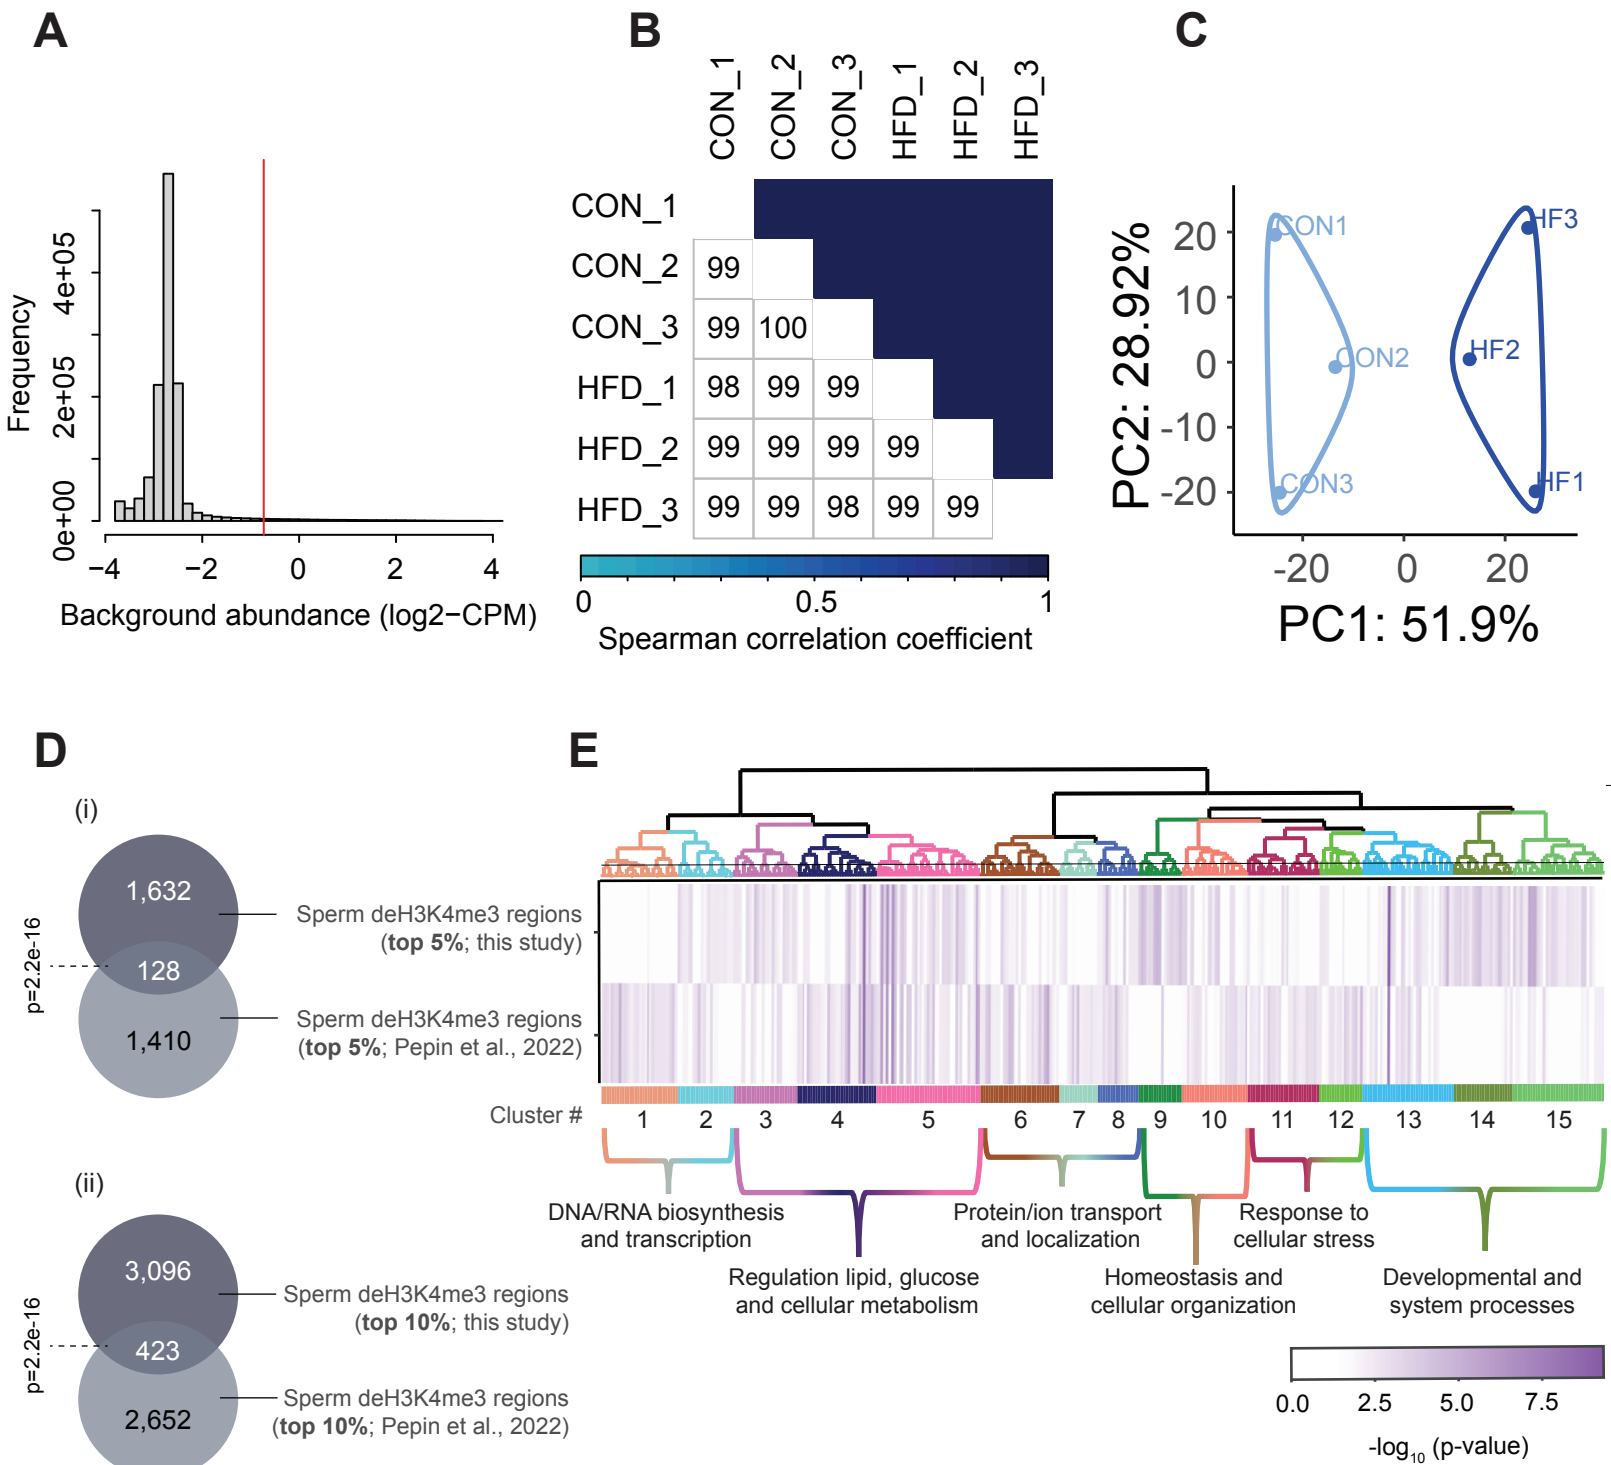

Supplement: supp [file elife-83288-supp-v1.zip]

Figure 4 - Figure supplement 1

**A**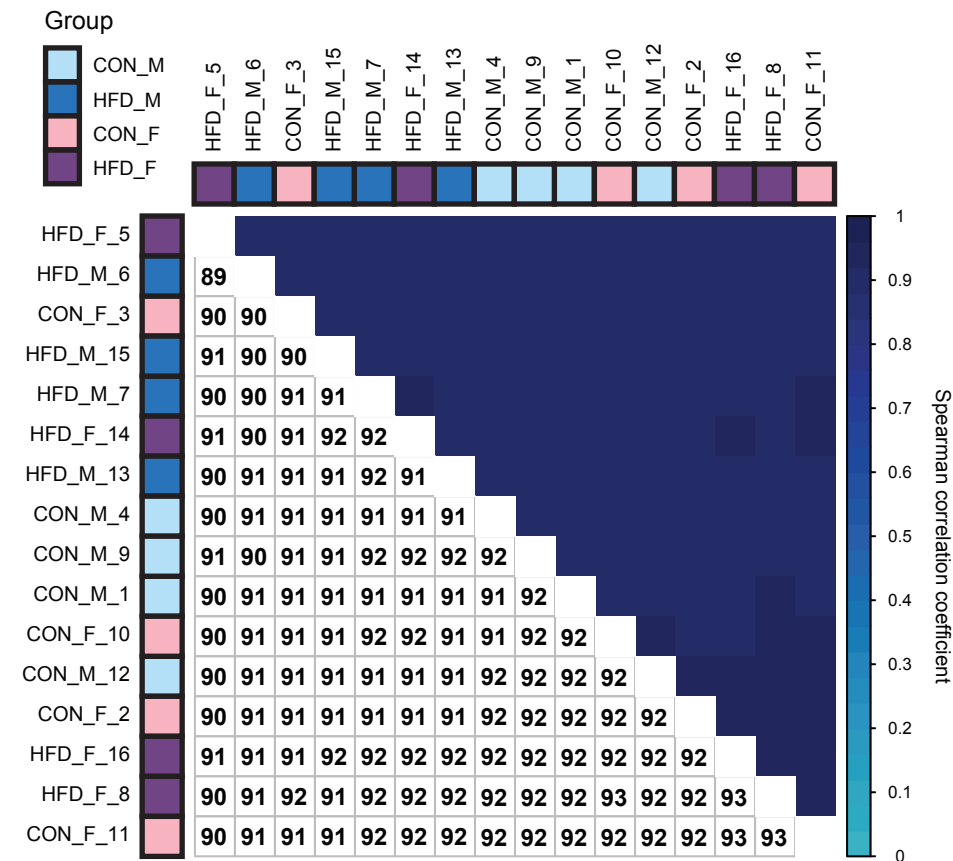**B**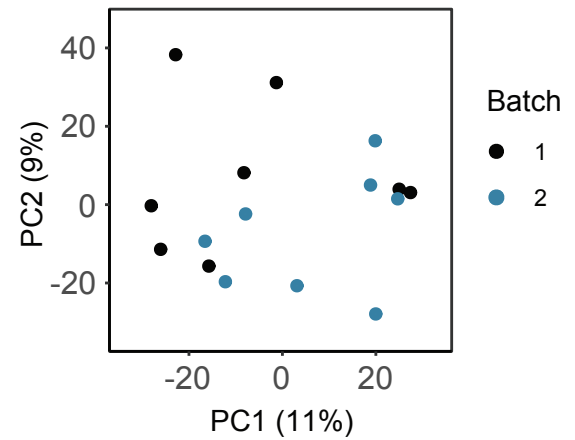**C**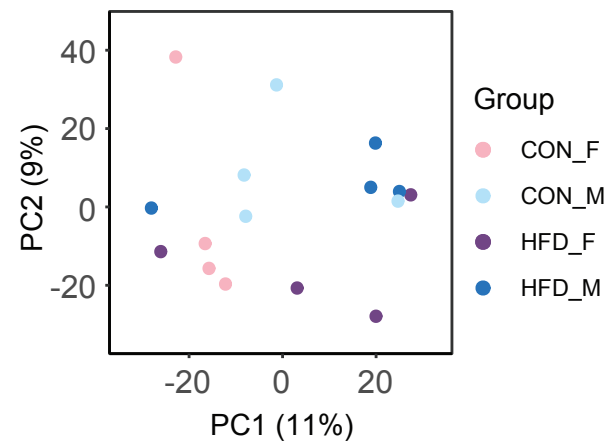**D**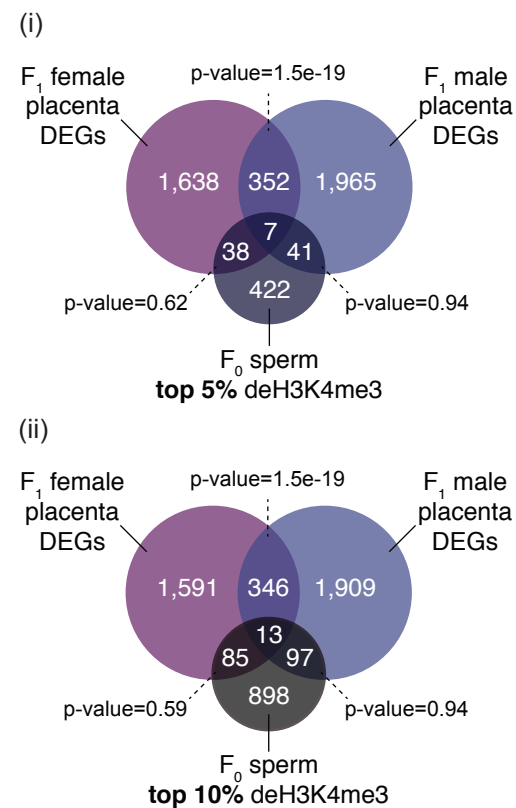**E**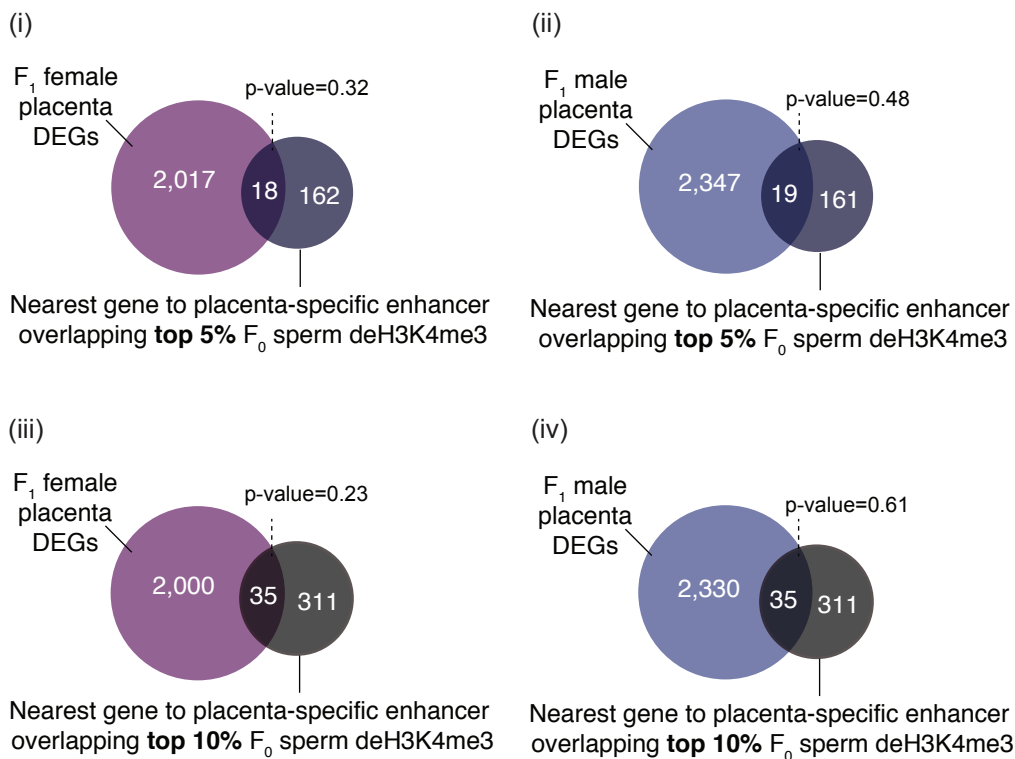

Supplement: supp [file elife-83288-supp-v1.zip]

Figure 5 - Figure supplement 3

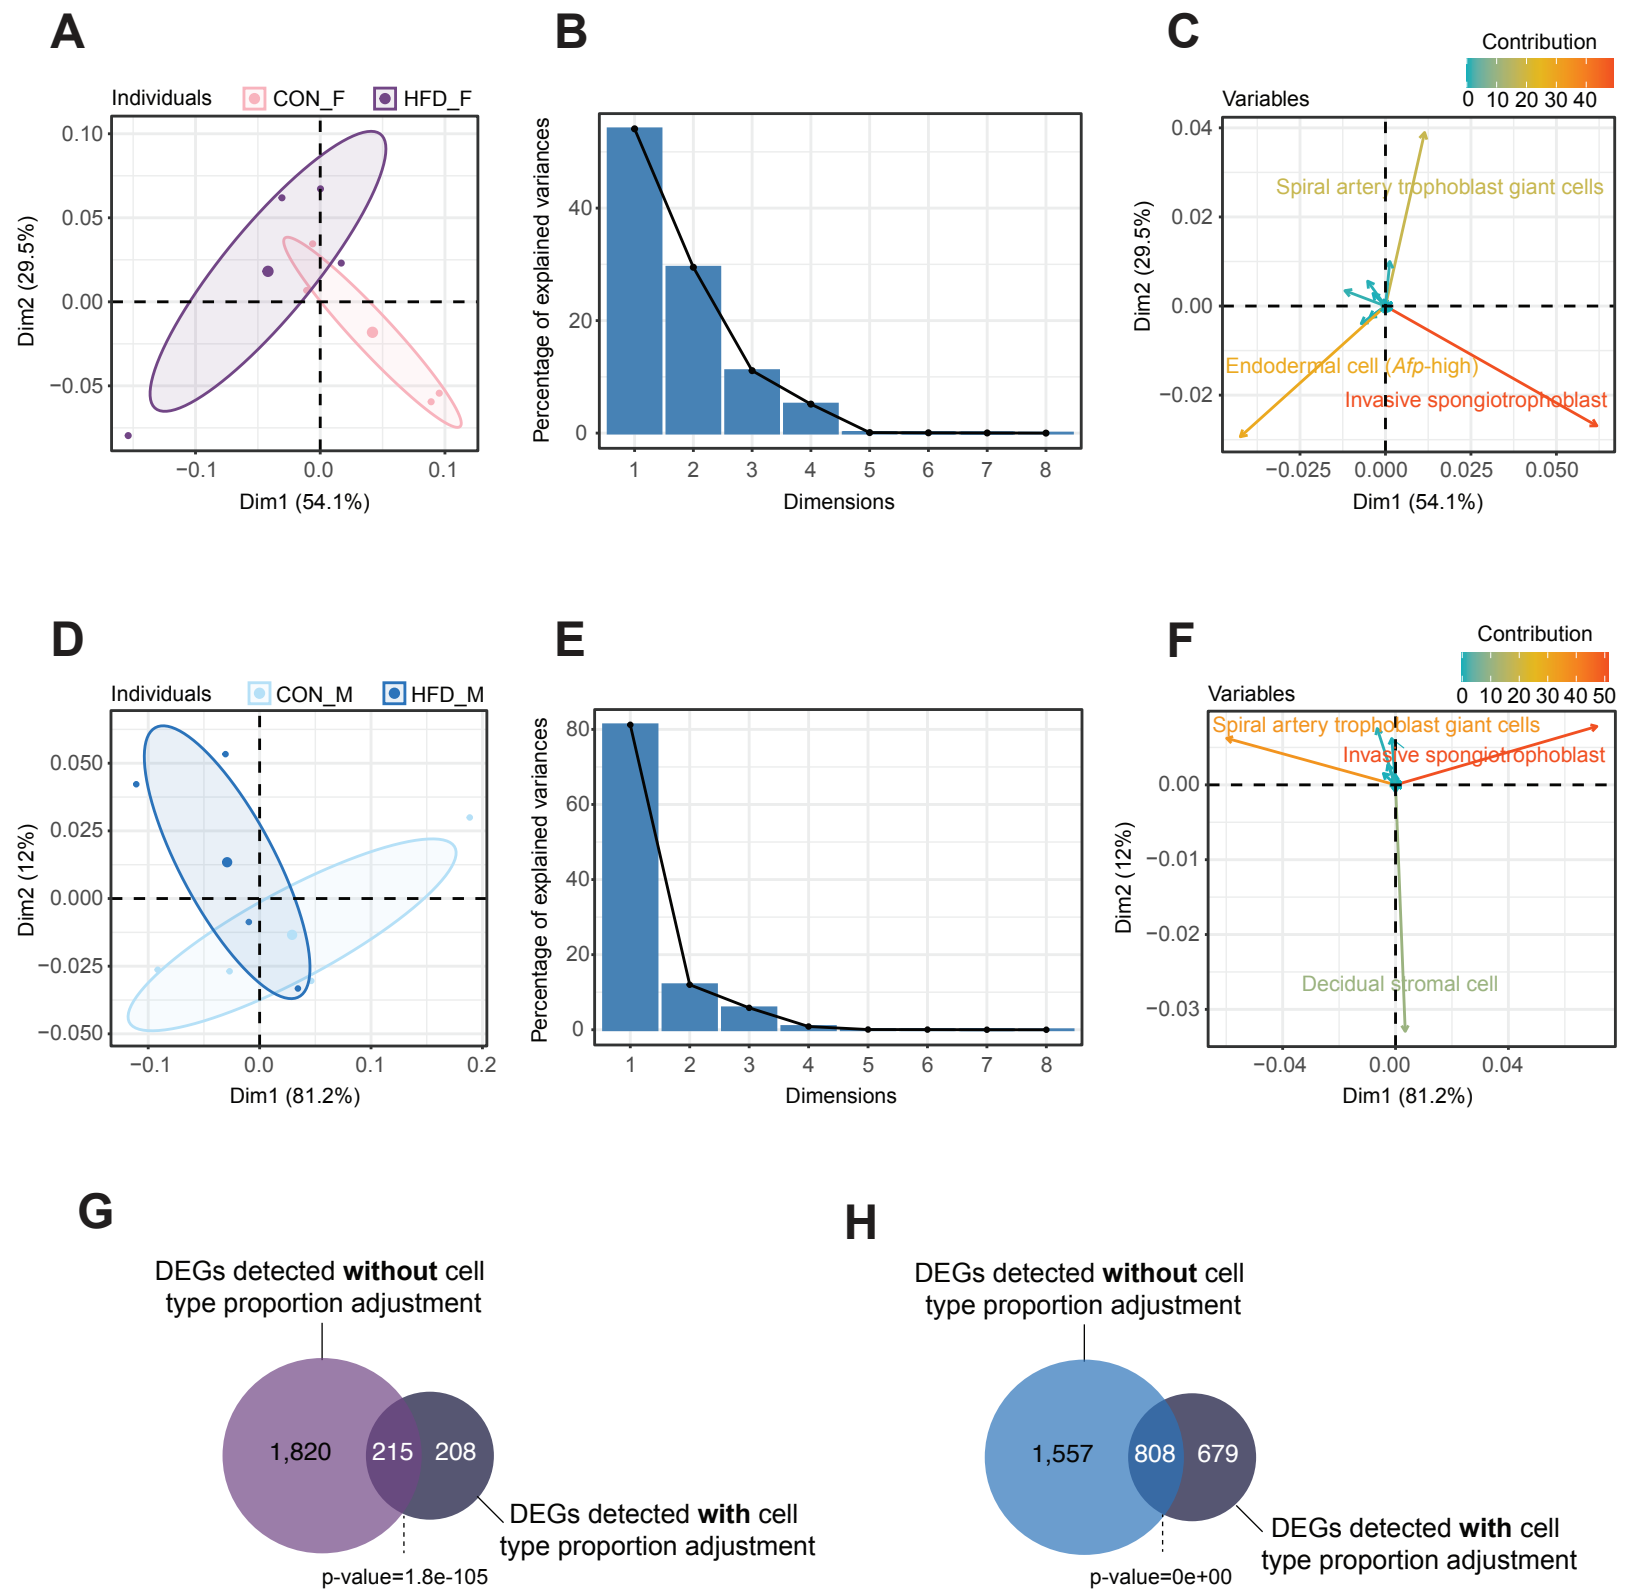

Supplement: supp [file elife-83288-supp-v1.zip]

Figure 5 - Figure supplement 1

A

Han et al., 2018

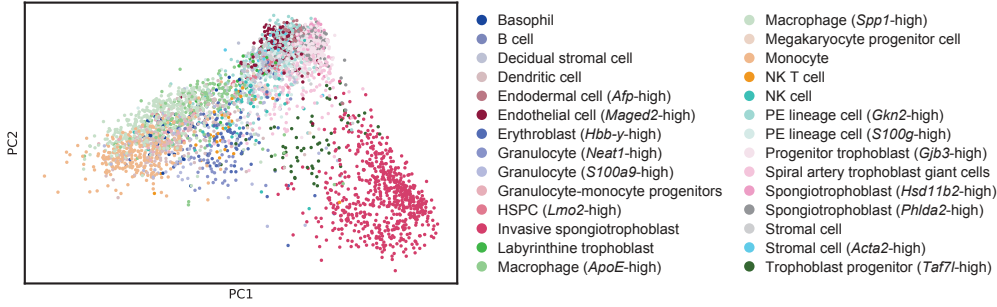

B

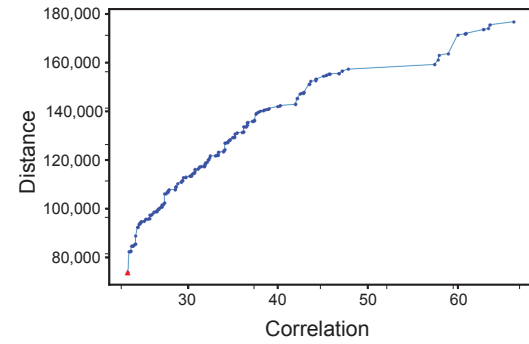

C

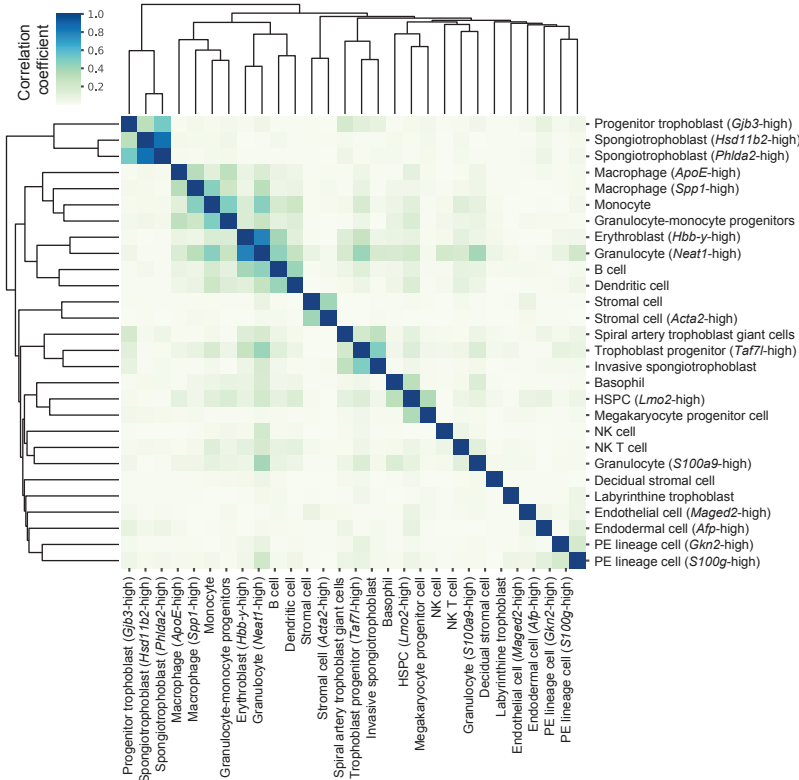

D

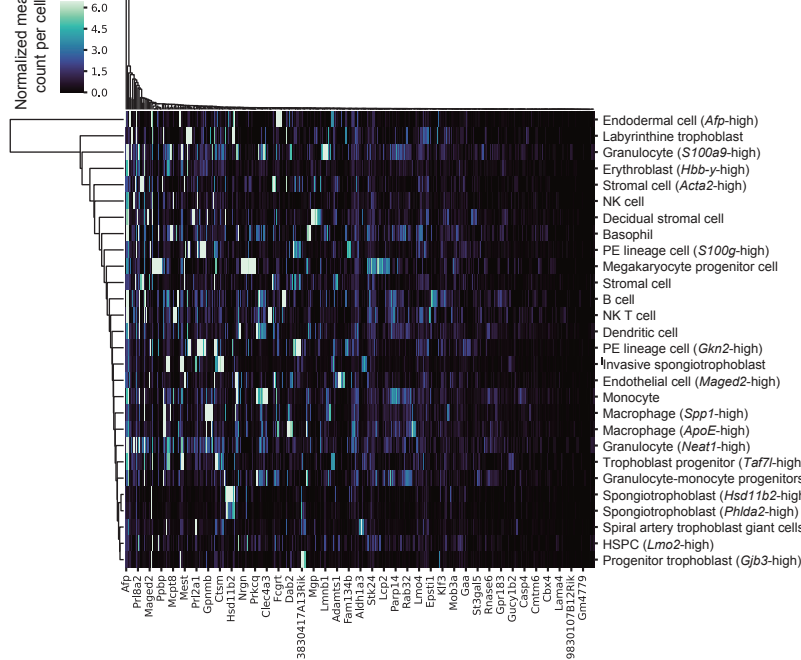

Supplement: supp [file elife-83288-supp-v1.zip]
